# Supplementary material for: Self-photocatalyzed regulable alkylation of 2H-benzothiazoles with diverse aliphatic C–H donors
Source: Royal Society of Chemistry journal article supplement (doi:10.1039/d2gc01225a), 2022-01-01
Supplement: d2gc01225a1.pdf [file d2gc01225a1.pdf]

## Supporting Information

### Self-photocatalyzed regulable alkylation of 2*H*-benzothiazoles with diverse aliphatic C–H donors

Jiadi Zhou,<sup>b, ‡</sup> Chaodong Wang,<sup>a, ‡</sup> Lei Huang,<sup>a</sup> Can Luo,<sup>a</sup> Shilu Ye,<sup>a</sup> Ning Xu,<sup>a</sup> Yunsheng Zhu,<sup>a</sup> Li Liu,<sup>a</sup> Quanlei Ren,<sup>a</sup> Zhi Chen,<sup>a</sup> Shengjie Song,<sup>a</sup> and Jianjun Li,<sup>\*a, b</sup>

<sup>a</sup> College of Pharmaceutical Sciences, Zhejiang University of Technology, Hangzhou 310014, P. R. of China.

<sup>b</sup> Collaborative Innovation Center of Yangtze River Delta Region Green Pharmaceuticals, Zhejiang University of Technology, Hangzhou 310014, P. R. of China.

<sup>‡</sup> These authors contributed equally.

\* Corresponding author. E-mail: [lijianjun@zjut.edu.cn](mailto:lijianjun@zjut.edu.cn)

### Table of contents

|                                                                   |     |
|-------------------------------------------------------------------|-----|
| 1. General method .....                                           | 2   |
| 2. General procedure .....                                        | 2   |
| 2.1 Representative procedure for the synthesis of <b>3</b> .....  | 2   |
| 2.2 Representative procedure for the synthesis of <b>11</b> ..... | 3   |
| 3. Additional optimization studies .....                          | 3   |
| 4. The mechanistic studies .....                                  | 4   |
| 4.1 Radical quenching experiment .....                            | 4   |
| 4.2 Chlorine radical trapping experiment .....                    | 6   |
| 4.3 Light on/off experiment .....                                 | 7   |
| 4.4 Kinetic isotope effect (KIE) experiment .....                 | 7   |
| 4.5 Singlet oxygen quenching experiment .....                     | 9   |
| 4.6 Superoxide radical quenching experiment .....                 | 9   |
| 4.7 Fluorescence quenching Screening Studies .....                | 9   |
| 4.8 Isomerization experiment of alcohols .....                    | 13  |
| 5. Characterization data for compounds .....                      | 15  |
| 6. NMR spectra .....                                              | 36  |
| 7. HRMS spectra .....                                             | 111 |

## 1. General method.

The reagents and solvents were purchased from commercial suppliers and used without further purification unless noted. All reactions were monitored by TLC with silica gel-coated plates.  $^1\text{H}$  (400 MHz or 600 MHz) NMR and  $^{13}\text{C}$  (101 MHz or 151 MHz) NMR spectra were recorded on a Varian spectrometer in  $\text{CDCl}_3$  or  $\text{DMSO}-d_6$  using tetramethylsilane (TMS) as internal standards. Data are reported as follows: Chemical shift (number of protons, multiplicity, coupling constants). Coupling constants were quoted to the nearest 0.1 Hz and multiplicity reported according to the following convention: s = singlet, d = doublet, t = triplet, q = quartet, hept = heptet, m = multiplet, dd = doublet of doublets, dt = doublet of triplets, td = triplet of doublets, ddd = doublet of doublet of doublets, br s = broad singlet. Mass spectra were measured with a HRMS-APCI instrument using ESI ionization. Fluorescence quenching experiments were performed on Hitachi F7000 FL Spectrophotometer and F97Pro Spectrophotometer.

## 2. General procedure

### 2.1 Representative procedure for the synthesis of **3**

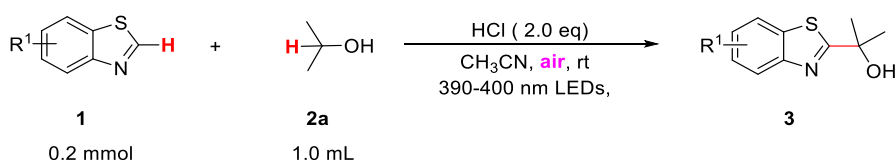

**General procedure A.** A mixture of compound **1** (0.2 mmol, 1.0 equiv.), alcohol **2** (1.0 mL), HCl (36wt%, 35  $\mu\text{L}$ , 2.0 equiv.) in a 10 mL Schlenk tube was added  $\text{CH}_3\text{CN}$  (2.0 mL). The reaction mixture was open to the air and stirred under the irradiation of  $2 \times 25$  W Purple LEDs ( $\lambda = 390 - 400$  nm) at room temperature for 24 h. The reaction mixture was quenched by  $\text{NaHCO}_3$  and then extracted with ethyl acetate ( $3 \times 10$  mL). The combined organic extracts were washed by brine, dried over  $\text{Na}_2\text{SO}_4$ , filtered, concentrated under reduced pressure and purified by column chromatography (petroleum ether/ethyl acetate = 30/1 – 3/1) on silica gel to give the products **3**.

## 2.2 Representative procedure for the synthesis of 11

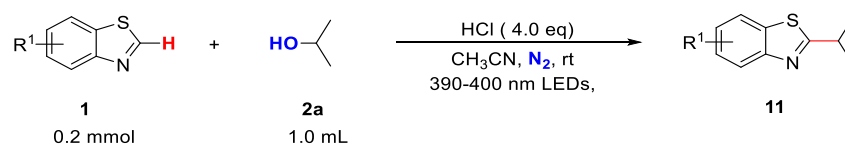

**General procedure B.** To a 10 mL Schlenk tube equipped with a magnetic stirring bar was added compound **1** (0.2 mmol, 1.0 equiv.). After three cycles of evacuation and backfilling of the reaction flask with  $\text{N}_2$ , alcohol **2** (1.0 mL), HCl (36wt%, 70  $\mu\text{L}$ , 4.0 equiv.) and  $\text{CH}_3\text{CN}$  (2.0 mL) was added. The reaction mixture stirred under the irradiation of  $2 \times 25$  W Purple LEDs ( $\lambda = 390 - 400$  nm) at room temperature for 48 h. The reaction mixture was quenched by  $\text{NaHCO}_3$  and then extracted with ethyl acetate ( $3 \times 10$  mL). The combined organic extracts were washed by brine, dried over  $\text{Na}_2\text{SO}_4$ , filtered, concentrated under reduced pressure and purified by column chromatography (petroleum ether/ethyl acetate = 60/1 – 30/1) on silica gel to give the products **11**.

## 3. Additional optimization studies

**Table S1. Additional optimization of reaction conditions.**<sup>[a]</sup>

| Entry | Deviation from standard conditions                          | Yield <b>3a</b><br>(%) <sup>[b]</sup> | Yield <b>11a</b><br>(%) <sup>[b]</sup> |
|-------|-------------------------------------------------------------|---------------------------------------|----------------------------------------|
| 1     | 40 mol% TBAB and TFA instead of HCl                         | 37                                    | 0                                      |
| 2     | 40 mol% TBAI and TFA instead of HCl                         | 0                                     | 0                                      |
| 3     | 40 mol% TBAC without HCl                                    | 22                                    | 0                                      |
| 3     | 25W Blue LEDs (450 – 460 nm) instead of Purple LEDs         | 15                                    | 0                                      |
| 4     | 25W White LEDs instead of Purple LEDs                       | 18                                    | 0                                      |
| 5     | Reaction at 60°C in the dark instead of light irradiation   | 0                                     | 0                                      |
| 6     | 5 equiv of <b>2a</b>                                        | 41                                    | 0                                      |
| 7     | 10 equiv of <b>2a</b>                                       | 64                                    | 0                                      |
| 8     | 0.2 mL (13 equiv) of <b>2a</b>                              | 66                                    | 0                                      |
| 9     | 0.5 mL (32 equiv) of <b>2a</b>                              | 71                                    | 0                                      |
| 10    | 1 equiv of HCl                                              | 62                                    | 0                                      |
| 11    | 3 equiv of HCl                                              | 86                                    | 0                                      |
| 12    | 4 equiv of TFA, under a $\text{N}_2$ atmosphere, 48 h       | trace                                 | 42                                     |
| 13    | 4 equiv of HCl, under a $\text{N}_2$ atmosphere, 48 h, 60°C | trace                                 | 68                                     |

[a] Reaction conditions: **1a** (0.2 mmol), **2a** (1.0 mL), HCl (2.0 equiv.),  $\text{CH}_3\text{CN}$  (2.0 mL),  $2 \times 25$  W Purple LEDs

(390 – 400 nm), 24 h, under an air atmosphere. [b] Isolated yields based on **1a**.

## 4. The mechanistic studies

### 4.1 Radical quenching experiment

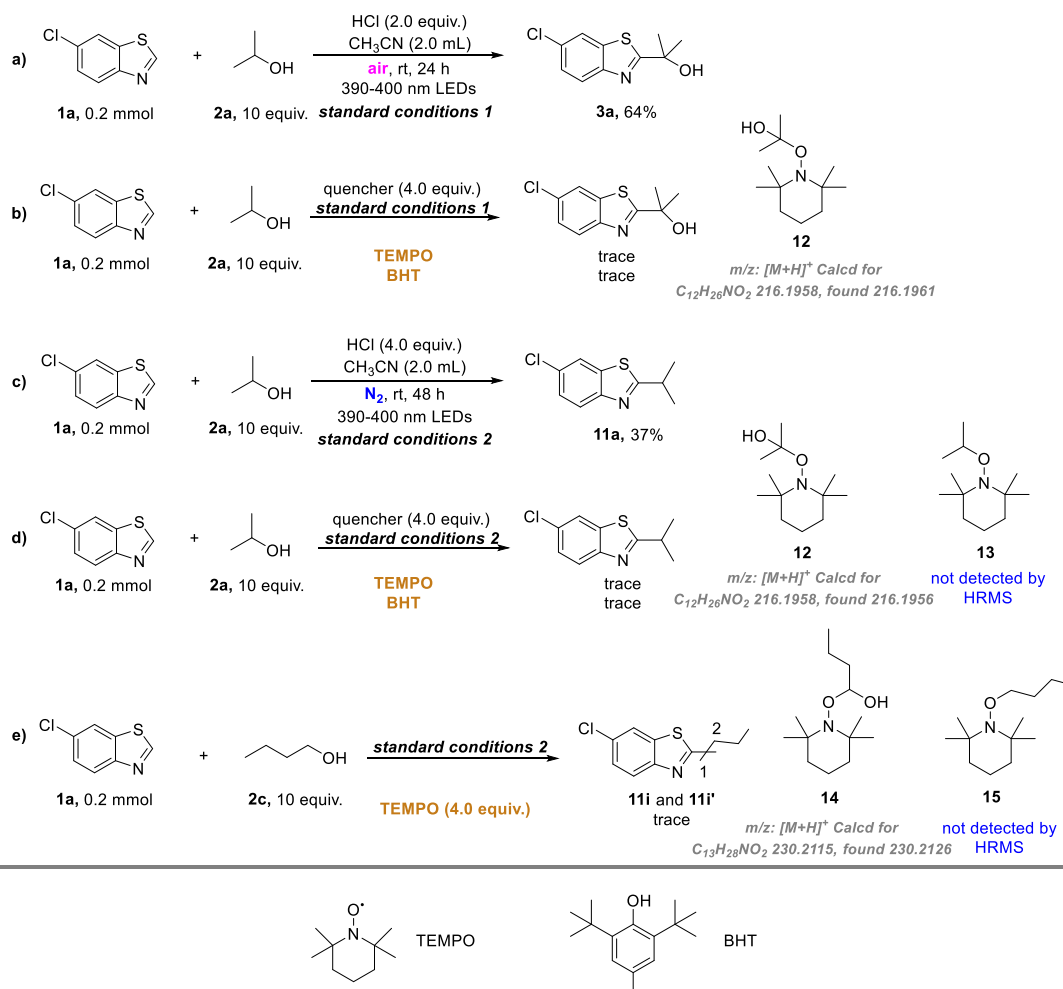

A mixture of compound **1a** (0.2 mmol, 1.0 equiv.), IPA **2a** (2.0 mmol, 10 equiv.), HCl (36wt%, 35  $\mu\text{L}$ , 2.0 equiv.) and a radical quencher (TEMPO or BHT, 0.8 mmol, 4.0 equiv.) in a 10 mL Schlenk tube was added CH<sub>3</sub>CN (2.0 mL). The reaction mixture was open to the air and stirred under the irradiation of 2×25 W Purple LEDs ( $\lambda = 390 - 400$  nm) at room temperature for 24 h. After the reaction was completed, only a trace amount of **3a** was observed by TLC.

To a 10 mL Schlenk tube equipped with a magnetic stirring bar was added compound **1a** (0.2 mmol, 1.0 equiv.) and a radical quencher (TEMPO or BHT, 0.8 mmol, 4.0 equiv.). After three cycles of evacuation and backfilling of the reaction flask with N<sub>2</sub>, IPA **2a** (2.0 mmol, 10 equiv.), HCl (36wt%,



70  $\mu\text{L}$ , 4.0 equiv.) and  $\text{CH}_3\text{CN}$  (2.0 mL) was added. The reaction mixture stirred under the irradiation of  $2 \times 25$  W Purple LEDs ( $\lambda = 390 - 400$  nm) at room temperature for 48 h. After the reaction was completed, only a trace amount of **11a** was observed by TLC.

To a 10 mL Schlenk tube equipped with a magnetic stirring bar was added compound **1a** (0.2 mmol, 1.0 equiv.) and TEMPO (0.8 mmol, 4.0 equiv.). After three cycles of evacuation and backfilling of the reaction flask with  $\text{N}_2$ , 1-butanol **2c** (2.0 mmol, 10 equiv.),  $\text{HCl}$  (36wt%, 70  $\mu\text{L}$ , 4.0 equiv.) and  $\text{CH}_3\text{CN}$  (2.0 mL) was added. The reaction mixture stirred under the irradiation of  $2 \times 25$  W Purple LEDs ( $\lambda = 390 - 400$  nm) at room temperature for 48 h. After the reaction was completed, only a trace amount of **11i** and **11i'** was observed by TLC.

The formation of **3a**, **11a**, **11i** and **11i'** was significantly suppressed by radical quenchers, which suggested that both dehydrogenative alkylation and dehydrative alkylation proceed through a radical-involved pathway.

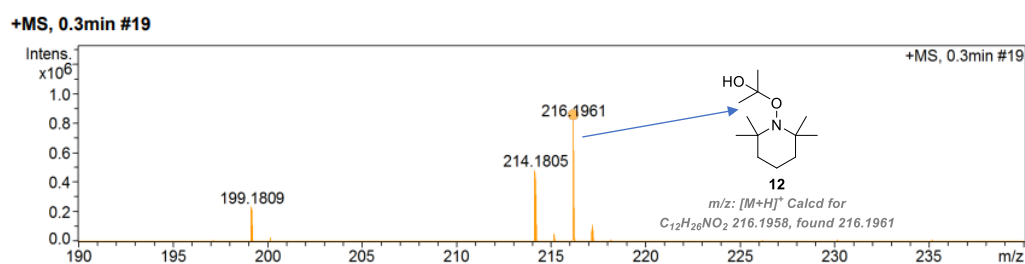

**Figure S1.** The HRMS analysis of radical quenching experiment **b**

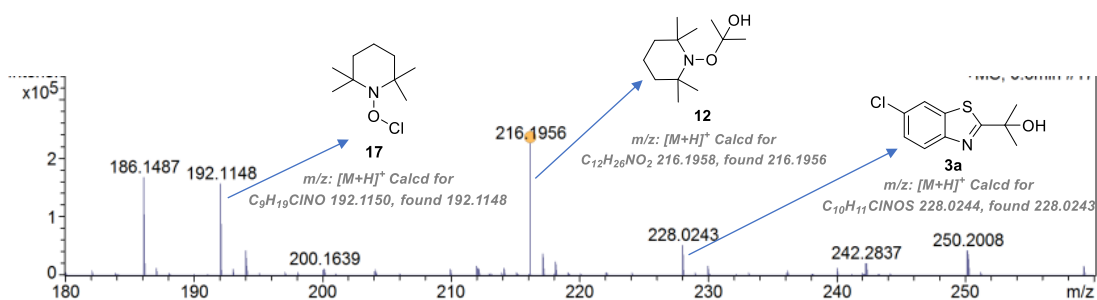

**Figure S2.** The HRMS analysis of radical quenching experiment **d**

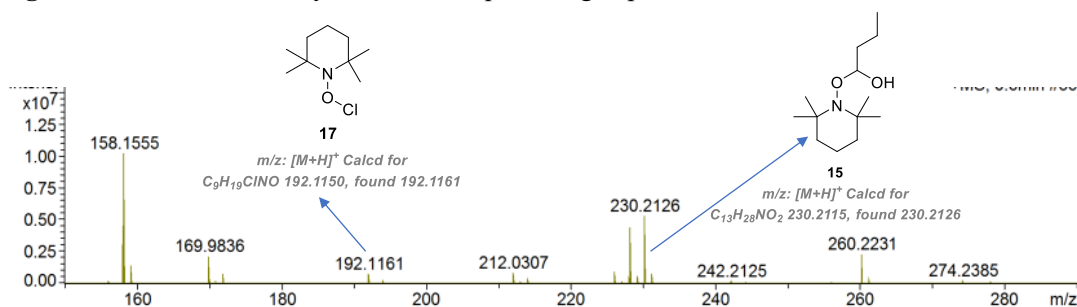

**Figure S3.** The HRMS analysis of radical quenching experiment **e**

## 4.2 Chlorine radical trapping experiment

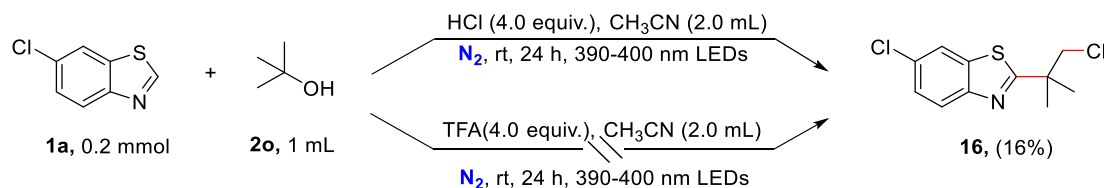

To a 10 mL Schlenk tube equipped with a magnetic stirring bar was added compound **1a** (0.2 mmol, 1.0 equiv.). After three cycles of evacuation and backfilling of the reaction flask with N<sub>2</sub>, *t*-BuOH **2o** (1.0 mL), HCl (36wt%, 70 μL, 4.0 equiv.) and CH<sub>3</sub>CN (2.0 mL) was added. The reaction mixture stirred under the irradiation of 2×25 W Purple LEDs ( $\lambda = 390 - 400$  nm) at room temperature for 24 h. The reaction mixture was quenched by NaHCO<sub>3</sub> and then extracted with ethyl acetate (3 × 10 mL). The combined organic extracts were washed by brine, dried over Na<sub>2</sub>SO<sub>4</sub>, filtered, concentrated under reduced pressure to obtain the crude product. The isolated **16** was obtained in 16% yield by preparative thin-layer chromatography using petroleum ether/ethyl acetate (50:1) as the eluent. On the contrary, no chloroalkylated product **16** was formed in the absence of chlorine anion.

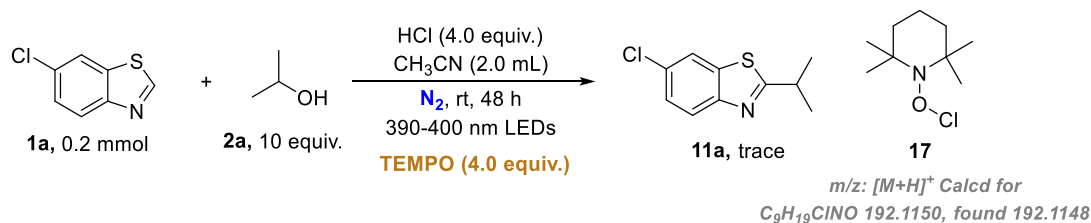

To a 10 mL Schlenk tube equipped with a magnetic stirring bar was added compound **1a** (0.2 mmol, 1.0 equiv.) and TEMPO (0.8 mmol, 4.0 equiv.). After three cycles of evacuation and backfilling of the reaction flask with N<sub>2</sub>, IPA **2a** (2.0 mmol, 10 equiv.), HCl (36wt%, 70 μL, 4.0 equiv.) and CH<sub>3</sub>CN (2.0 mL) was added. The reaction mixture stirred under the irradiation of 2×25 W Purple LEDs ( $\lambda = 390 - 400$  nm) at room temperature for 48 h. After the reaction was completed, a chlorine radical adduct **17** was detected by ESI-HRMS, which indicated the formation of Cl<sup>•</sup> in our case (see Figure S2).

### 4.3 Light on/off experiment

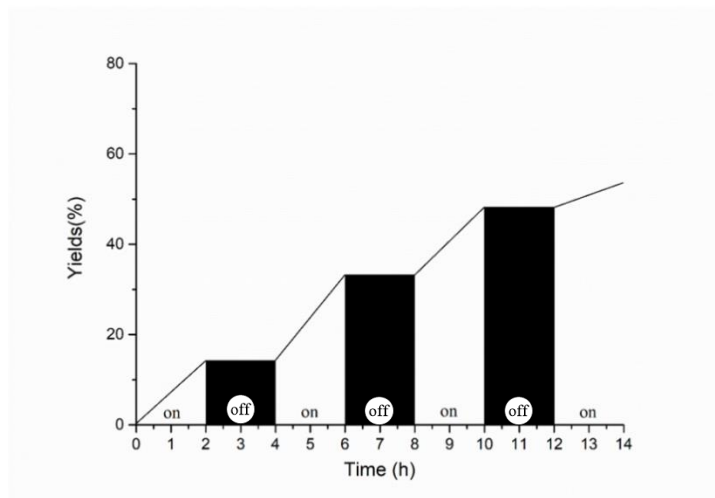

**Figure S4.** On/off light experiments for the model reaction under air atmosphere

### 4.4 Kinetic isotope effect (KIE) experiment

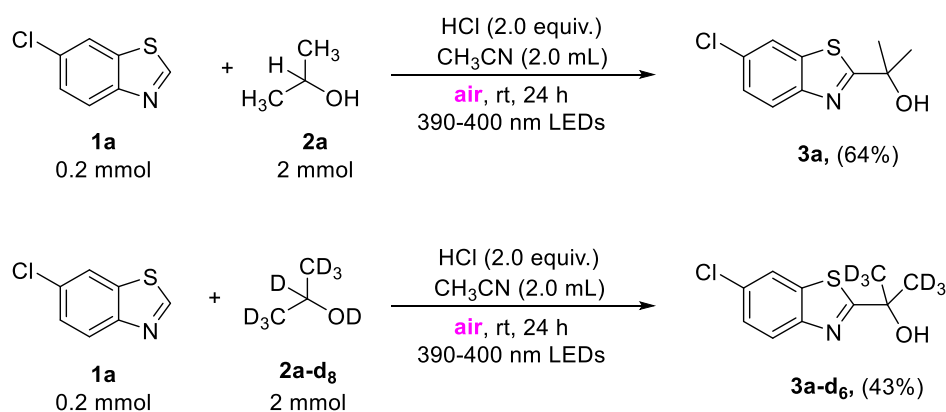

**Parallel reactions.** Two 10 mL Schlenk tubes were added **2a** (2 mmol) and **2a-d<sub>8</sub>** (2 mmol), separately. The mixtures were then sequentially added compound **1a** (0.2 mmol, 1.0 equiv.), HCl (36wt%, 35  $\mu\text{L}$ , 2.0 equiv.), CH<sub>3</sub>CN (2.0 mL). The reaction tubes were open to the air and stirred under the irradiation of 2 $\times$ 25 W Purple LEDs ( $\lambda = 390 - 400 \text{ nm}$ ) at room temperature for 24 h. The reaction mixtures were quenched by NaHCO<sub>3</sub> and then extracted with ethyl acetate (3  $\times$  10 mL). The combined organic extracts were washed by brine, dried over Na<sub>2</sub>SO<sub>4</sub>, filtered, concentrated under reduced pressure and purified by column chromatography (petroleum ether/ethyl acetate = 10/1) on silica get to give the products **3a** and **3a-d<sub>6</sub>** in 64% and 43% yields, respectively.  $k_H/k_D = 1.48$ .

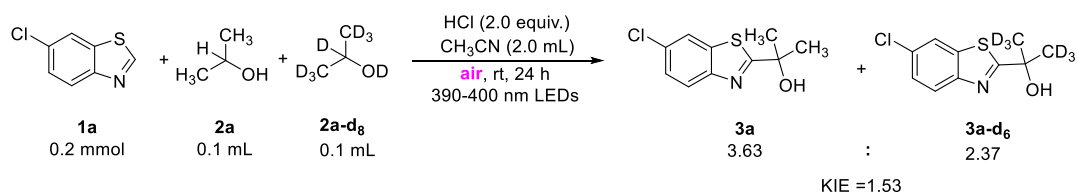

**Intermolecular competition.** A mixture of compound **1a** (0.2 mmol, 1.0 equiv.), **2a** (0.1 mL), **2a-d<sub>8</sub>** (0.1 mL), HCl (36wt%, 35  $\mu$ L, 2.0 equiv.) in a 10 mL Schlenk tube was added CH<sub>3</sub>CN (2.0 mL). The reaction mixture was open to the air and stirred under the irradiation of 2 $\times$ 25 W Purple LEDs ( $\lambda$  = 390 – 400 nm) at room temperature for 24 h. The reaction mixture was quenched by NaHCO<sub>3</sub> and then extracted with ethyl acetate (3  $\times$  10 mL). The combined organic extracts were washed by brine, dried over Na<sub>2</sub>SO<sub>4</sub>, filtered, concentrated under reduced pressure and purified by column chromatography (petroleum ether/ethyl acetate = 10/1) on silica gel to give the products **3a** and **3a-d<sub>6</sub>**, with a ratio of 3.63:2.37,  $k_H/k_D$  = 1.53.

Kinetic isotope effect experiment suggesting that the alkyl C–H cleavage might not be the rate-determine step.

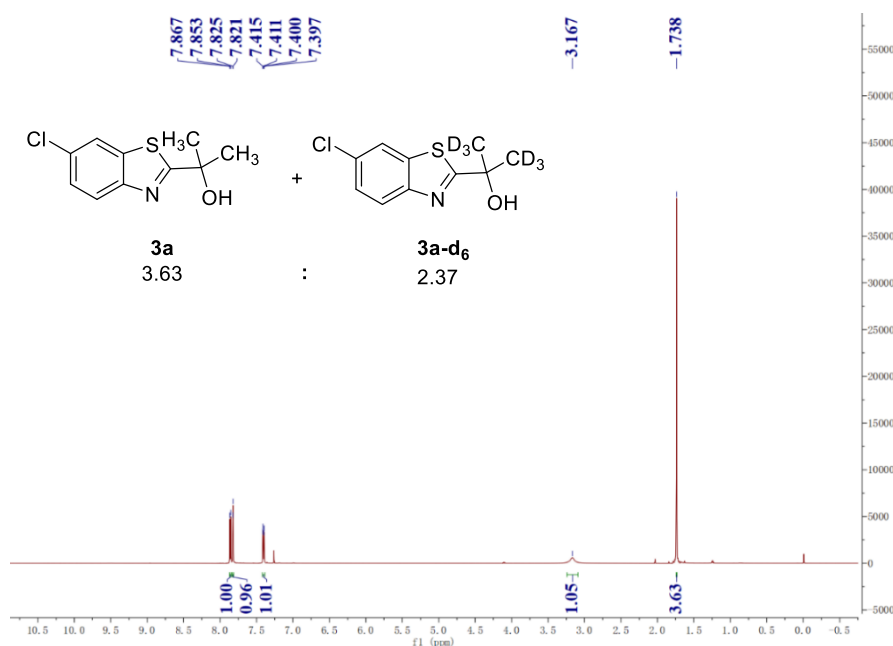

**Figure S5.** Determination of the ratio of **3a** and **3a-d<sub>6</sub>** by <sup>1</sup>H NMR

#### 4.5 Singlet oxygen quenching experiment

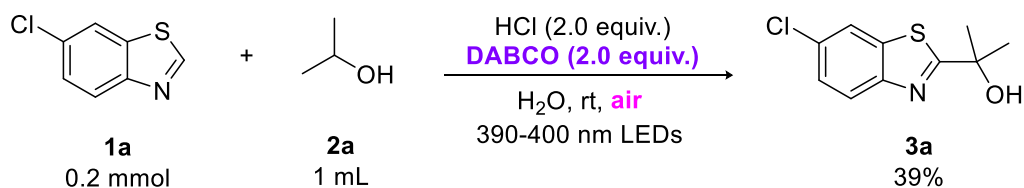

A mixture of compound **1a** (0.2 mmol, 1.0 equiv.), **2a** (IPA, 1.0 mL), HCl (36wt%, 35  $\mu$ L, 2.0 equiv.) and DABCO (0.4 mmol, 2.0 equiv.) in a 10 mL Schlenk tube was added H<sub>2</sub>O (2.0 mL). The reaction tubes was open to the air and stirred under the irradiation of 2 $\times$ 25 W Purple LEDs ( $\lambda$  = 390 – 400 nm) at room temperature for 24 h. The reaction mixtures were quenched by NaHCO<sub>3</sub> and then extracted with ethyl acetate (3  $\times$  10 mL). The combined organic extracts were washed by brine, dried over Na<sub>2</sub>SO<sub>4</sub>, filtered, concentrated under reduced pressure and purified by column chromatography (petroleum ether/ethyl acetate = 10/1) on silica get to give the products **3a** in 39% yields.

#### 4.6 Superoxide radical quenching experiment

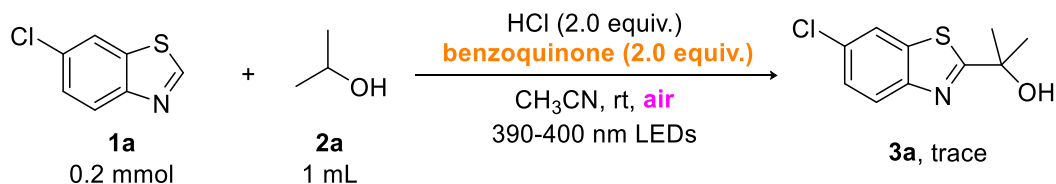

A mixture of compound **1a** (0.2 mmol, 1.0 equiv.), **2a** (IPA, 1.0 mL), HCl (36wt%, 35  $\mu$ L, 2.0 equiv.) and benzoquinone (0.4 mmol, 2.0 equiv.) in a 10 mL Schlenk tube was added CH<sub>3</sub>CN (2.0 mL). The reaction tubes was open to the air and stirred under the irradiation of 2 $\times$ 25 W Purple LEDs ( $\lambda$  = 390 – 400 nm) at room temperature for 24 h. After the reaction was completed, only a trace amount of **3a** was observed by TLC.

#### 4.7 Fluorescence quenching Screening Studies

**Preparation.** Four formulated solutions were prepared with CH<sub>3</sub>CN in 10 mL volumetric flasks. For flask A, 6-chlorobenzo[d]thiazole (**1a**, 0.5 mmol, 84.5 mg) was added; for flask B, 6-chlorobenzo[d]thiazole (**1a**, 0.5 mmol, 84.5 mg) and TFA (0.75 mmol, 57  $\mu$ L) were added; for the flask C, Bu<sub>4</sub>NCl (0.5 mmol, 139 mg) was added; for the flask D, isopropyl alcohol (**2a**, IPA, 0.5

mmol, 38  $\mu$ L). All these flasks were diluted to 10 mL to set the concentration to be 0.05 M.

**Fluorescence quenching experiments of 1a with Cl<sup>-</sup>.** A quartz cuvette (1 cm  $\times$  1 cm  $\times$  3.5 cm) was added 60  $\mu$ L of the formulated solution from flask A and was diluted to 3 mL as a 1  $\mu$ M **1a** solution, which was then irradiated at 350 nm. Duplicate experiments were performed with the addition of 0, 60, 90, 120, 180, 240  $\mu$ L 0.05 M Bu<sub>4</sub>NCl solution from flask C before diluted to 3 mL, emission spectra of the sample were collected instantly after each addition. The resulting fluorescence emission spectra are shown in Figure S6. No significant fluorescence quenching between excited **1a** and Bu<sub>4</sub>NCl was observed.

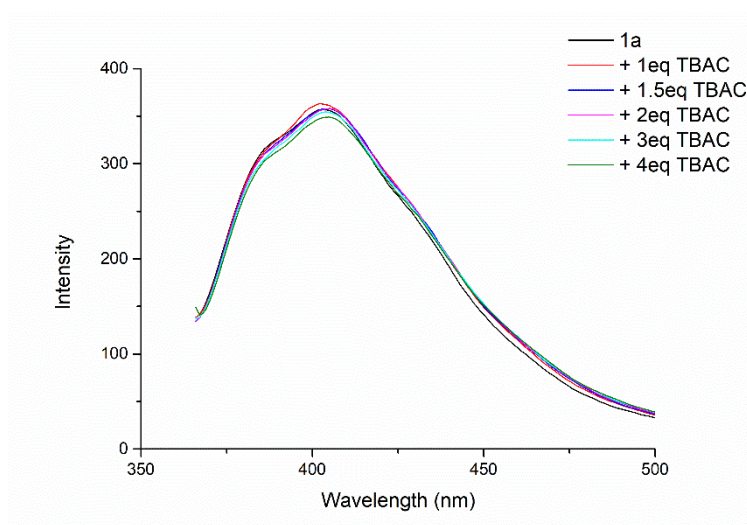

**Figure S6.** Emission intensity of 1  $\mu$ M **1a** in CH<sub>3</sub>CN, with varied amount of Bu<sub>4</sub>NCl

**Fluorescence quenching experiments of 1a-H<sup>+</sup> with Cl<sup>-</sup>.** A quartz cuvette (1 cm  $\times$  1 cm  $\times$  3.5 cm) was added 60  $\mu$ L of the formulated solution from flask B and was diluted to 3 mL as a 1  $\mu$ M **1a** solution, which was then irradiated at 350 nm. Duplicate experiments were performed with the addition of 0, 60, 120, 180, 240, 360  $\mu$ L 0.05 M Bu<sub>4</sub>NCl solution from flask C before diluted to 3 mL, emission spectra of the sample were collected instantly after each addition. The resulting fluorescence emission spectra are shown in Figure S7.

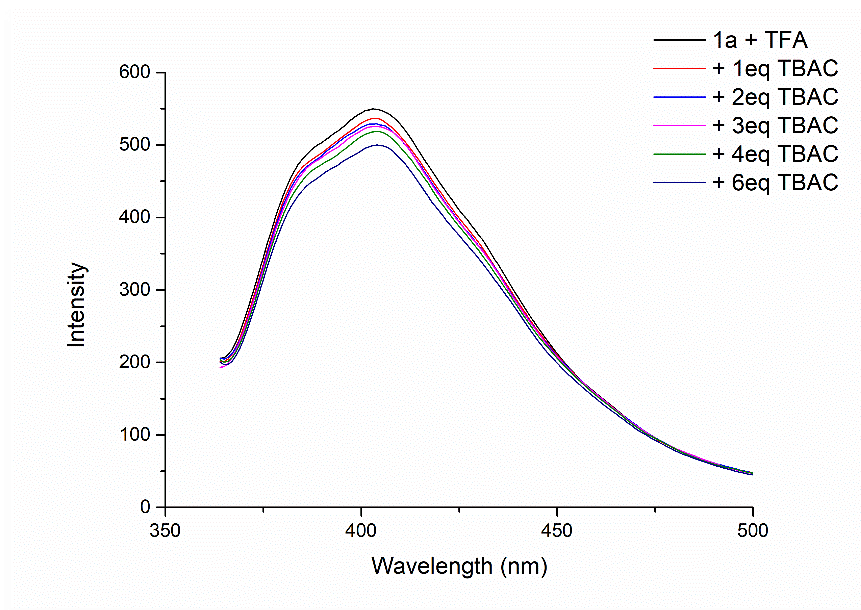

**Figure S7.** Emission intensity of 1  $\mu\text{M}$  **1a-H<sup>+</sup>** in  $\text{CH}_3\text{CN}$ , with varied amount of  $\text{Bu}_4\text{NCl}$

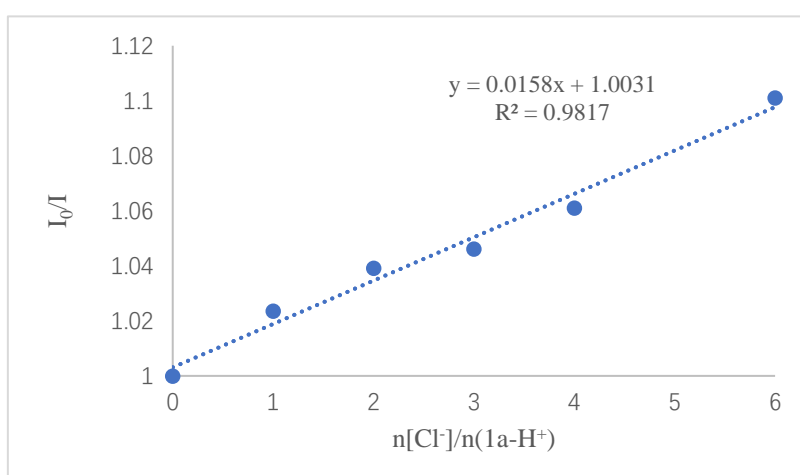

**Figure S8.** Stern-Volmer plot of **1a-H<sup>+</sup>** and  $\text{Bu}_4\text{NCl}$

**Fluorescence quenching experiments of 1a with IPA.** A quartz cuvette (1 cm  $\times$  1 cm  $\times$  3.5 cm) was added 60  $\mu\text{L}$  of the formulated solution from flask A and was diluted to 3 mL as a 1  $\mu\text{M}$  **1a** solution, which was then irradiated at 365 nm. Duplicate experiments were performed with the addition of 0, 60, 120, 180, 240, 360  $\mu\text{L}$  0.05 M IPA solution from flask D before diluted to 3 mL, emission spectra of the sample were collected instantly after each addition. The resulting fluorescence emission spectra are shown in Figure S9. No significant fluorescence quenching between excited **1a** and IPA was observed.

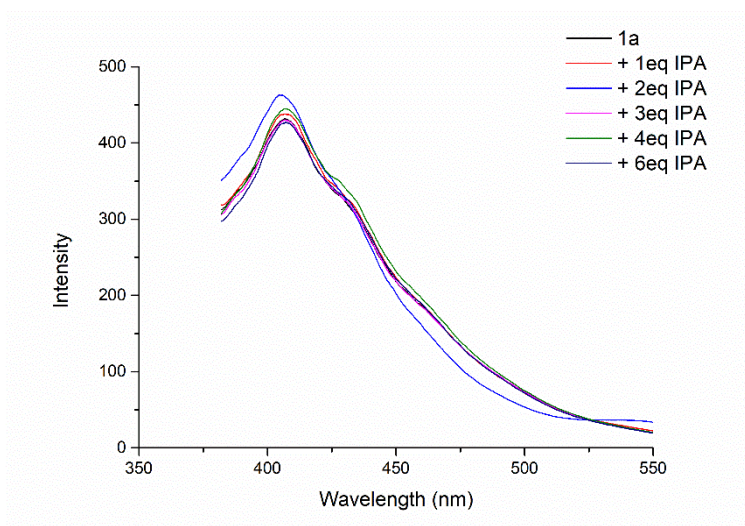

**Figure S9.** Emission intensity of 1  $\mu\text{M}$  **1a** in  $\text{CH}_3\text{CN}$ , with varied amount of IPA

**Fluorescence quenching experiments of  $1\text{a-H}^+$  with IPA.** A quartz cuvette (1 cm  $\times$  1 cm  $\times$  3.5 cm) was added 60  $\mu\text{L}$  of the formulated solution from flask B and was diluted to 3 mL as a 1  $\mu\text{M}$  **1a** solution, which was then irradiated at 350 nm. Duplicate experiments were performed with the addition of 0, 60, 120, 180, 240, 360  $\mu\text{L}$  0.05 M IPA solution from flask D before diluted to 3 mL, emission spectra of the sample were collected instantly after each addition. The resulting fluorescence emission spectra are shown in Figure S10.

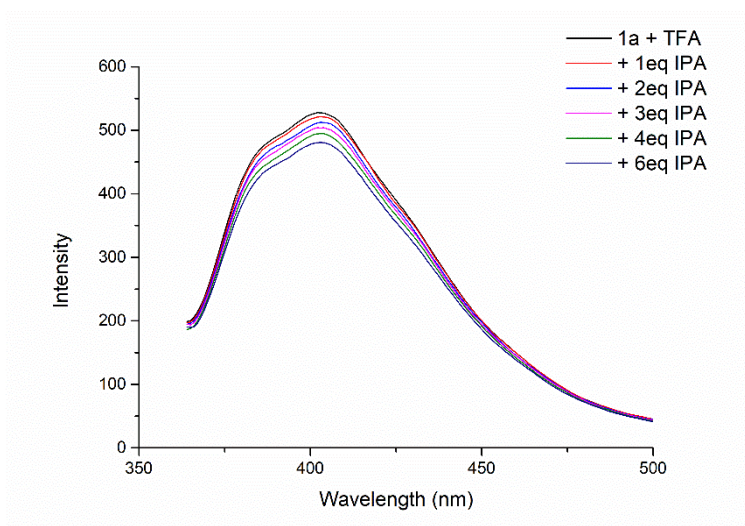

**Figure S10.** Emission intensity of 1  $\mu\text{M}$  **1a-H<sup>+</sup>** in  $\text{CH}_3\text{CN}$ , with varied amount of IPA



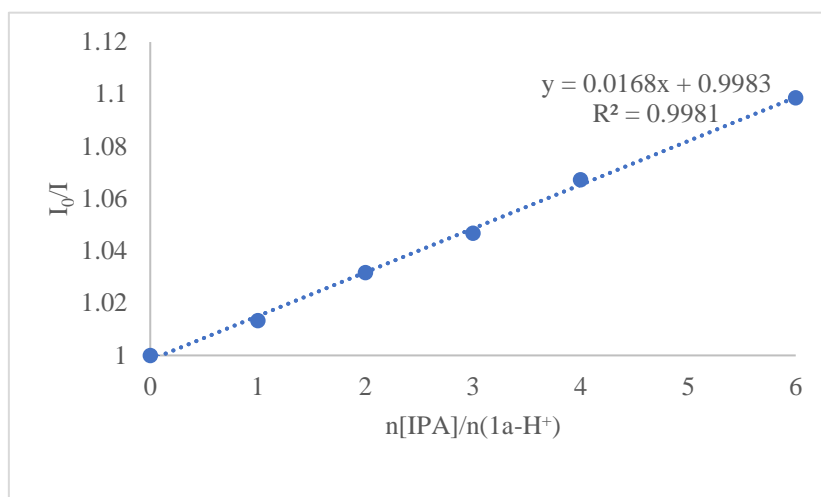

**Figure S11.** Stern-Volmer plot of **1a-H<sup>+</sup>** and IPA

#### 4.8 Isomerization experiment of alcohols

Three 10 mL Schlenk tubes were added IPA (1.0 mL), 1-butanol (1.0 mL) and 3-pentanol (1.0 mL). After three cycles of evacuation and backfilling of the reaction flask with N<sub>2</sub>. The mixtures were then sequentially added HCl (36wt%, 70 μL) and CH<sub>3</sub>CN (2.0 mL). The reaction mixture stirred under the irradiation of 2×25 W Purple LEDs (λ = 390 – 400 nm) at room temperature for 48 h. After the reaction was completed, the reaction mixture was directly detected by <sup>1</sup>H NMR. The results of <sup>1</sup>H NMR spectrogram showed that no isomers formed in our conditions.

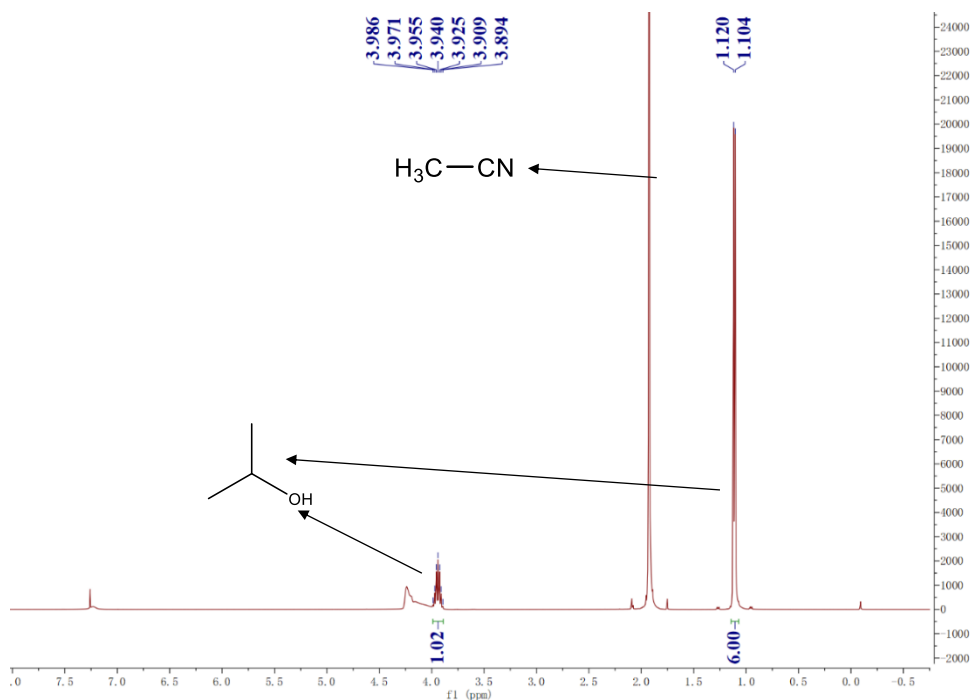

**Figure S12.** <sup>1</sup>H NMR (400 MHz, CDCl<sub>3</sub>) spectrogram of IPA under acidic condition in CH<sub>3</sub>CN

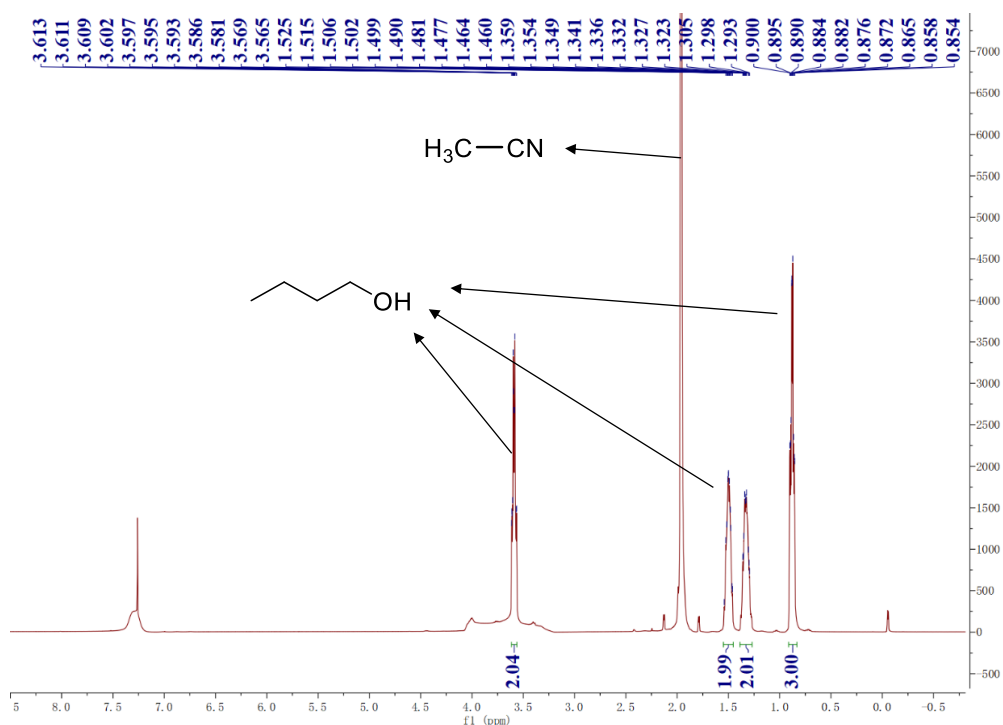

**Figure S13.**  $^1\text{H}$  NMR (400 MHz,  $\text{CDCl}_3$ ) spectrogram of 1-butanol under acidic condition in  $\text{CH}_3\text{CN}$

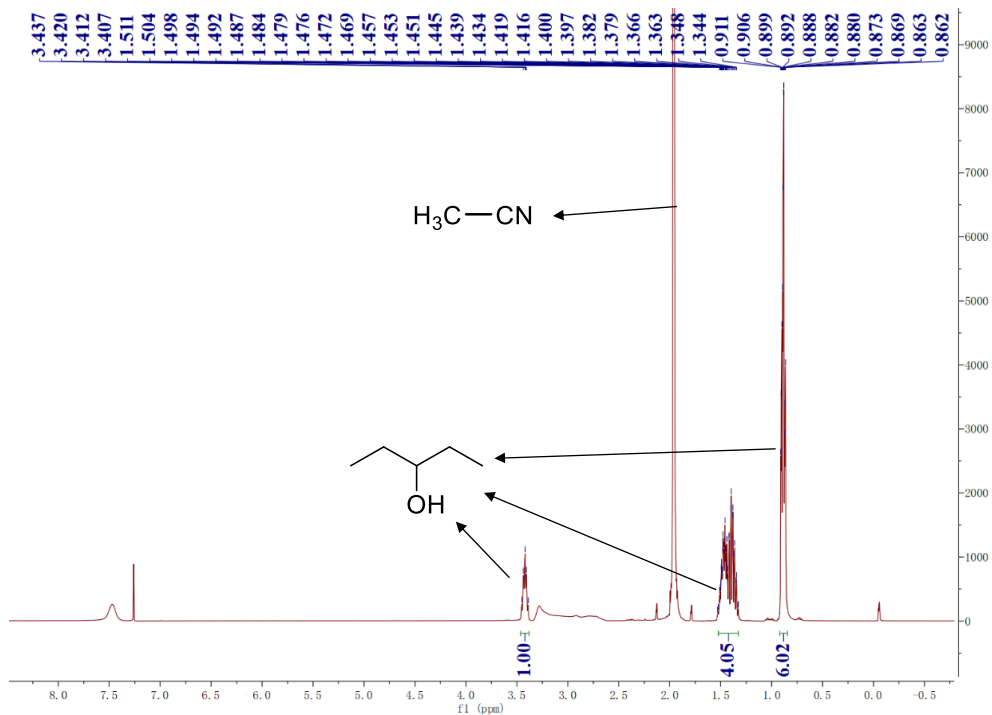

**Figure S14.**  $^1\text{H}$  NMR (400 MHz,  $\text{CDCl}_3$ ) spectrogram of 3-pentanol under acidic condition in  $\text{CH}_3\text{CN}$

## 5. Characterization data for compounds

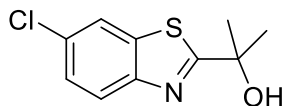

**2-(6-chlorobenzo[d]thiazol-2-yl)propan-2-ol (3a).** Yield = 82%; White solid;  $^1\text{H NMR}$  (600 MHz,  $\text{CDCl}_3$ )  $\delta$  7.88 (d,  $J = 8.7$  Hz, 1H), 7.85 (d,  $J = 2.1$  Hz, 1H), 7.43 (dd,  $J = 8.7, 2.0$  Hz, 1H), 2.77 (br, 1H), 1.75 (s, 6H);  $^{13}\text{C NMR}$  (151 MHz,  $\text{CDCl}_3$ )  $\delta$  180.69, 151.63, 136.51, 130.86, 126.88, 123.62, 121.41, 73.71, 30.74. **HRMS** (ESI) calcd for  $\text{C}_{10}\text{H}_{11}\text{ClNOS}$   $[\text{M}+\text{H}]^+$  : 228.0244, found 228.0243.

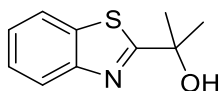

**2-(benzo[d]thiazol-2-yl)propan-2-ol (3b).** Yield = 65%; White solid;  $^1\text{H NMR}$  (400 MHz,  $\text{CDCl}_3$ )  $\delta$  7.98 (d,  $J = 8.2$  Hz, 1H), 7.86 (d,  $J = 7.9$  Hz, 1H), 7.48 – 7.44 (m, 1H), 7.38 – 7.34 (m, 1H), 3.26 (br, 1H), 1.75 (s, 6H);  $^{13}\text{C NMR}$  (101 MHz,  $\text{CDCl}_3$ )  $\delta$  180.28, 152.96, 135.26, 126.09, 124.97, 122.83, 121.81, 73.63, 30.82.

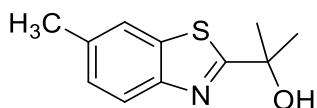

**2-(6-methylbenzo[d]thiazol-2-yl)propan-2-ol (3c).** Yield = 81%; White solid;  $^1\text{H NMR}$  (600 MHz,  $\text{CDCl}_3$ )  $\delta$  7.83 (d,  $J = 8.3$  Hz, 1H), 7.59 (s, 1H), 7.23 (d,  $J = 8.3$  Hz, 1H), 3.87 (br, 1H), 2.44 (s, 3H), 1.73 (s, 6H);  $^{13}\text{C NMR}$  (151 MHz,  $\text{CDCl}_3$ )  $\delta$  179.24, 151.15, 135.42, 134.92, 127.56, 122.29, 121.48, 73.52, 30.78, 21.48.

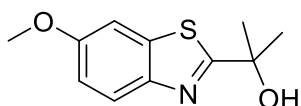

**2-(6-methoxybenzo[d]thiazol-2-yl)propan-2-ol (3d).** Yield = 67%; White solid;  $^1\text{H NMR}$  (400 MHz,  $\text{CDCl}_3$ )  $\delta$  7.84 (d,  $J = 8.9$  Hz, 1H), 7.33 – 7.29 (m, 1H), 7.05 (dd,  $J = 8.9, 2.4$  Hz, 1H), 3.86 (s, 3H), 3.18 (br, 1H), 1.73 (s, 6H);  $^{13}\text{C NMR}$  (151 MHz,  $\text{CDCl}_3$ )  $\delta$  177.51, 157.45, 147.45, 136.58, 123.29, 115.33,

104.29, 73.46, 55.80, 30.77.

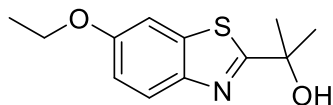

**2-(6-ethoxybenzo[d]thiazol-2-yl)propan-2-ol (3e).** Yield = 75%; White solid;  $^1\text{H NMR}$  (600 MHz,  $\text{CDCl}_3$ )  $\delta$  7.84 (d,  $J = 8.9$  Hz, 1H), 7.31 (d,  $J = 2.5$  Hz, 1H), 7.05 (dd,  $J = 8.9, 2.5$  Hz, 1H), 4.08 (q,  $J = 7.0$  Hz, 2H), 3.15 (br, 1H), 1.73 (s, 6H), 1.45 (t,  $J = 7.0$  Hz, 3H);  $^{13}\text{C NMR}$  (151 MHz,  $\text{CDCl}_3$ )  $\delta$  177.31, 156.82, 147.30, 136.55, 123.26, 115.80, 105.02, 73.45, 64.13, 30.79, 14.83. **HRMS** (ESI) calcd for  $\text{C}_{12}\text{H}_{16}\text{NO}_2\text{S}$   $[\text{M}+\text{H}]^+$ : 238.0896, found 238.0903.

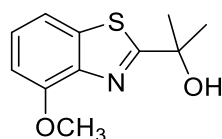

**2-(4-methoxybenzo[d]thiazol-2-yl)propan-2-ol (3f).** Yield = 68%; White solid;  $^1\text{H NMR}$  (600 MHz,  $\text{CDCl}_3$ )  $\delta$  7.44 (dd,  $J = 8.1, 1.0$  Hz, 1H), 7.29 (td,  $J = 8.0, 0.9$  Hz, 1H), 6.89 (dd,  $J = 8.0, 1.1$  Hz, 1H), 4.01 (s, 3H), 3.29 (br, 1H), 1.76 (s, 6H);  $^{13}\text{C NMR}$  (151 MHz,  $\text{CDCl}_3$ )  $\delta$  178.89, 153.13, 143.14, 136.97, 125.82, 113.78, 106.56, 73.69, 56.00, 30.80.

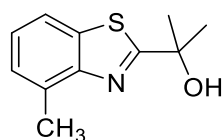

**2-(4-methylbenzo[d]thiazol-2-yl)propan-2-ol (3g).** Yield = 83%; White solid;  $^1\text{H NMR}$  (600 MHz,  $\text{CDCl}_3$ )  $\delta$  7.72 – 7.70 (m, 1H), 7.29 – 7.26 (m, 2H), 3.62 (br, 1H), 2.75 (s, 3H), 1.76 (s, 6H);  $^{13}\text{C NMR}$  (151 MHz,  $\text{CDCl}_3$ )  $\delta$  178.11, 152.05, 135.38, 132.97, 126.59, 124.86, 119.12, 73.42, 31.04, 18.30.

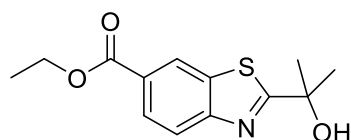

**ethyl 2-(2-hydroxypropan-2-yl)benzo[d]thiazole-6-carboxylate (3h).** Yield = 79%; White solid;  $^1\text{H NMR}$  (600 MHz,  $\text{CDCl}_3$ )  $\delta$  8.58 (d,  $J = 1.3$  Hz, 1H), 8.12 (dd,  $J = 8.6, 1.6$  Hz, 1H), 7.97 (d,  $J = 8.6$  Hz,

1H), 4.41 (q,  $J = 7.1$  Hz, 2H), 3.22 (br, 1H), 1.76 (s, 6H), 1.41 (t,  $J = 7.1$  Hz, 3H);  $^{13}\text{C}$  NMR (151 MHz,  $\text{CDCl}_3$ )  $\delta$  184.17, 166.27, 156.11, 135.21, 127.21, 126.99, 123.99, 122.50, 73.88, 61.34, 30.67, 14.35. **HRMS** (ESI) calcd for  $\text{C}_{13}\text{H}_{16}\text{NO}_3\text{S}$   $[\text{M}+\text{H}]^+$  : 266.0845, found 266.0854.

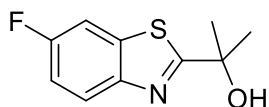

**2-(6-fluorobenzo[d]thiazol-2-yl)propan-2-ol (3i).** Yield = 71%; White solid;  $^1\text{H}$  NMR (600 MHz,  $\text{CDCl}_3$ )  $\delta$  7.91 (dd,  $J = 8.9, 4.8$  Hz, 1H), 7.55 (dd,  $J = 8.1, 2.6$  Hz, 1H), 7.20 (td,  $J = 8.9, 2.6$  Hz, 1H), 2.86 (br, 1H), 1.74 (s, 6H);  $^{13}\text{C}$  NMR (151 MHz,  $\text{CDCl}_3$ )  $\delta$  179.78 (d,  $J = 3.1$  Hz), 160.25 (d,  $J = 245.3$  Hz), 149.70 (d,  $J = 1.3$  Hz), 136.31 (d,  $J = 11.1$  Hz), 123.79 (d,  $J = 9.4$  Hz), 114.68 (d,  $J = 24.7$  Hz), 107.94 (d,  $J = 26.6$  Hz), 73.65, 30.74.

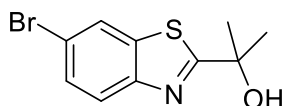

**2-(6-bromobenzo[d]thiazol-2-yl)propan-2-ol (3j).** Yield = 89%; White solid;  $^1\text{H}$  NMR (600 MHz,  $\text{CDCl}_3$ )  $\delta$  8.01 (d,  $J = 1.9$  Hz, 1H), 7.82 (d,  $J = 8.7$  Hz, 1H), 7.56 (dd,  $J = 8.7, 1.9$  Hz, 1H), 2.93 (br, 1H), 1.74 (s, 6H);  $^{13}\text{C}$  NMR (151 MHz,  $\text{CDCl}_3$ )  $\delta$  180.74, 152.00, 137.01, 129.55, 124.34, 124.00, 118.47, 73.71, 30.73. **HRMS** (ESI) calcd for  $\text{C}_{10}\text{H}_{11}\text{BrNOS}$   $[\text{M}+\text{H}]^+$  : 273.9719, found 273.9719.

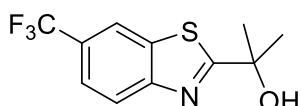

**2-(6-(trifluoromethyl)benzo[d]thiazol-2-yl)propan-2-ol (3k).** Yield = 78%; White solid;  $^1\text{H}$  NMR (600 MHz,  $\text{CDCl}_3$ )  $\delta$  8.18 (d,  $J = 1.5$  Hz, 1H), 8.06 (d,  $J = 8.6$  Hz, 1H), 7.71 (dd,  $J = 8.6, 1.5$  Hz, 1H), 2.87 (br, 1H), 1.77 (s, 6H);  $^{13}\text{C}$  NMR (151 MHz,  $\text{CDCl}_3$ )  $\delta$  183.57, 155.26, 135.46, 127.14 (q,  $J = 32.7$  Hz), 125.08 (q,  $J = 270.7$  Hz), 123.25, 123.02 (q,  $J = 3.4$  Hz), 119.51 (q,  $J = 4.2$  Hz), 73.94, 30.71. **HRMS** (ESI) calcd for  $\text{C}_{11}\text{H}_{11}\text{F}_3\text{NOS}$   $[\text{M}+\text{H}]^+$  : 262.0508, found 262.0514.

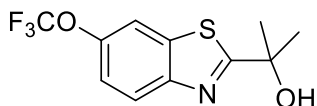

**2-(6-(trifluoromethoxy)benzo[d]thiazol-2-yl)propan-2-ol (3l).** Yield = 78%; White solid;  $^1\text{H NMR}$  (600 MHz,  $\text{CDCl}_3$ )  $\delta$  7.96 (d,  $J = 8.9$  Hz, 1H), 7.75 – 7.72 (m, 1H), 7.35 – 7.31 (m, 1H), 3.17 (br, 1H), 1.75 (s, 6H);  $^{13}\text{C NMR}$  (151 MHz,  $\text{CDCl}_3$ )  $\delta$  181.67, 151.68, 146.23 (q,  $J = 2.0$  Hz), 136.13, 123.66, 120.53 (q,  $J = 257.3$  Hz), 119.98, 114.37, 73.76, 30.67. **HRMS** (ESI) calcd for  $\text{C}_{11}\text{H}_{11}\text{F}_3\text{NO}_2\text{S}$   $[\text{M}+\text{H}]^+$  : 278.0457, found 278.0466.

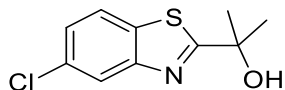

**2-(5-chlorobenzo[d]thiazol-2-yl)propan-2-ol (3m).** Yield = 84%; White solid;  $^1\text{H NMR}$  (600 MHz,  $\text{CDCl}_3$ )  $\delta$  7.96 (d,  $J = 2.0$  Hz, 1H), 7.77 (d,  $J = 8.5$  Hz, 1H), 7.34 (dd,  $J = 8.5, 2.0$  Hz, 1H), 3.01 (br, 1H), 1.74 (s, 6H);  $^{13}\text{C NMR}$  (151 MHz,  $\text{CDCl}_3$ )  $\delta$  182.24, 153.96, 133.57, 132.05, 125.44, 122.76, 122.50, 73.75, 30.73.

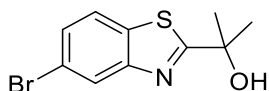

**2-(5-bromobenzo[d]thiazol-2-yl)propan-2-ol (3n).** Yield = 84%; White solid;  $^1\text{H NMR}$  (600 MHz,  $\text{CDCl}_3$ )  $\delta$  8.12 (d,  $J = 1.8$  Hz, 1H), 7.72 (d,  $J = 8.5$  Hz, 1H), 7.47 (dd,  $J = 8.5, 1.9$  Hz, 1H), 2.92 (br, 1H), 1.74 (s, 6H);  $^{13}\text{C NMR}$  (151 MHz,  $\text{CDCl}_3$ )  $\delta$  182.00, 154.31, 134.13, 128.05, 125.83, 122.84, 119.60, 73.73, 30.74. **HRMS** (ESI) calcd for  $\text{C}_{10}\text{H}_{11}\text{BrNOS}$   $[\text{M}+\text{H}]^+$  : 273.9719, found 273.9729.

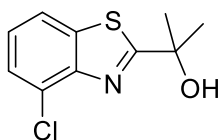

**2-(4-chlorobenzo[d]thiazol-2-yl)propan-2-ol (3o).** Yield = 80%; Colorless oil;  $^1\text{H NMR}$  (600 MHz,  $\text{CDCl}_3$ )  $\delta$  7.76 – 7.71 (m, 1H), 7.48 – 7.44 (m, 1H), 7.29 – 7.24 (m, 1H), 3.83 (br, 1H), 1.78 (s, 6H);  $^{13}\text{C NMR}$  (151 MHz,  $\text{CDCl}_3$ )  $\delta$  181.35, 150.12, 136.78, 127.55, 126.24, 125.38, 120.33, 73.81, 30.73. **HRMS** (ESI) calcd for  $\text{C}_{10}\text{H}_{11}\text{ClNOS}$   $[\text{M}+\text{H}]^+$  : 228.0244, found 228.0246.

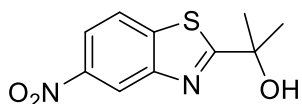

**2-(5-nitrobenzo[d]thiazol-2-yl)propan-2-ol (3p).** Yield = 35%; Yellow solid;  $^1\text{H NMR}$  (400 MHz,  $\text{CDCl}_3$ )  $\delta$  8.80 (d,  $J = 2.1$  Hz, 1H), 8.23 (dd,  $J = 8.8, 2.2$  Hz, 1H), 7.99 (d,  $J = 8.8$  Hz, 1H), 3.10 (br, 1H), 1.77 (s, 6H);  $^{13}\text{C NMR}$  (101 MHz,  $\text{CDCl}_3$ )  $\delta$  184.34, 153.18, 146.63, 142.09, 122.28, 119.35, 118.43, 74.00, 30.61.

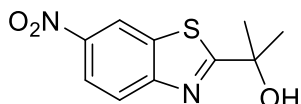

**2-(6-nitrobenzo[d]thiazol-2-yl)propan-2-ol (3q).** Yield = 28%; Yellow solid;  $^1\text{H NMR}$  (400 MHz,  $\text{CDCl}_3$ )  $\delta$  8.77 (d,  $J = 2.3$  Hz, 1H), 8.30 (dd,  $J = 9.0, 2.3$  Hz, 1H), 8.02 (d,  $J = 9.0$  Hz, 1H), 3.29 (br, 1H), 1.77 (s, 6H);  $^{13}\text{C NMR}$  (101 MHz,  $\text{CDCl}_3$ )  $\delta$  186.99, 157.22, 144.70, 135.71, 123.13, 121.47, 118.42, 74.21, 30.58.

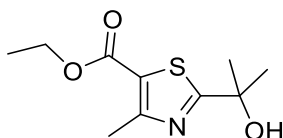

**ethyl 2-(2-hydroxypropan-2-yl)-4-methylthiazole-5-carboxylate (3r).** Yield = 75%; White solid;  $^1\text{H NMR}$  (600 MHz,  $\text{CDCl}_3$ )  $\delta$  4.30 (q,  $J = 7.1$  Hz, 2H), 3.16 (br, 1H), 2.67 (s, 3H), 1.64 (s, 6H), 1.34 (t,  $J = 7.1$  Hz, 3H);  $^{13}\text{C NMR}$  (151 MHz,  $\text{CDCl}_3$ )  $\delta$  181.92, 162.41, 159.86, 121.98, 73.37, 61.16, 30.72, 17.41, 14.29. **HRMS** (ESI) calcd for  $\text{C}_{10}\text{H}_{16}\text{NO}_3\text{S}$   $[\text{M}+\text{H}]^+$  : 230.0845, found 230.0856.

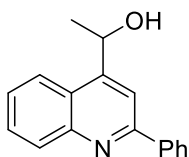

**1-(2-phenylquinolin-4-yl)ethan-1-ol (3s).** Yield = 43%; Yellow oil;  $^1\text{H NMR}$  (400 MHz,  $\text{CDCl}_3$ )  $\delta$  8.21 (d,  $J = 8.4$  Hz, 1H), 8.12 – 8.08 (m, 2H), 7.97 (s, 1H), 7.90 (d,  $J = 7.9$  Hz, 1H), 7.70 (ddd,  $J = 8.3, 6.9, 1.3$  Hz, 1H), 7.52 – 7.42 (m, 4H), 5.59 (q,  $J = 6.5$  Hz, 1H), 2.60 (br, 1H), 1.64 (d,  $J = 6.5$  Hz, 3H);  $^{13}\text{C NMR}$  (101 MHz,  $\text{CDCl}_3$ )  $\delta$  157.22, 152.10, 148.12, 139.34, 130.34, 129.44, 129.34, 128.78, 127.55, 126.23, 124.26, 122.71, 114.44, 66.37, 24.58.

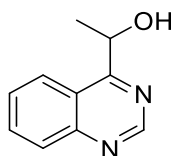

**1-(quinazolin-4-yl)ethan-1-ol (3t).** Yield = 56%; White solid;  $^1\text{H NMR}$  (400 MHz,  $\text{DMSO-}d_6$ )  $\delta$  11.80 (s, 1H), 8.11 (dd,  $J = 7.9, 1.2$  Hz, 1H), 7.84 – 7.76 (m, 1H), 7.64 (d,  $J = 8.1$  Hz, 1H), 7.53 – 7.45 (m, 1H), 5.66 (s, 1H), 4.60 (q,  $J = 6.3$  Hz, 1H), 1.43 (d,  $J = 6.6$  Hz, 3H);  $^{13}\text{C NMR}$  (101 MHz,  $\text{DMSO-}d_6$ )  $\delta$  162.00, 160.20, 148.93, 134.84, 127.43, 126.77, 126.29, 121.67, 67.62, 22.06.

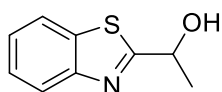

**1-(benzo[d]thiazol-2-yl)ethan-1-ol (4a).** Yield = 33%; White solid;  $^1\text{H NMR}$  (600 MHz,  $\text{CDCl}_3$ )  $\delta$  7.92 (d,  $J = 8.2$  Hz, 1H), 7.81 (d,  $J = 8.0$  Hz, 1H), 7.43 – 7.40 (m, 1H), 7.34 – 7.31 (m, 1H), 5.25 (q,  $J = 6.6$  Hz, 1H), 4.41 (br, 1H), 1.68 (d,  $J = 6.6$  Hz, 3H);  $^{13}\text{C NMR}$  (151 MHz,  $\text{CDCl}_3$ )  $\delta$  177.80, 152.73, 134.67, 126.10, 125.00, 122.67, 121.83, 68.34, 24.05.

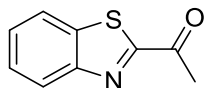

**1-(benzo[d]thiazol-2-yl)ethan-1-one (4a').** Yield = 21%; White solid;  $^1\text{H NMR}$  (600 MHz,  $\text{CDCl}_3$ )  $\delta$  8.18 (d,  $J = 8.2$  Hz, 1H), 7.96 (d,  $J = 8.2$  Hz, 1H), 7.58 – 7.55 (m, 1H), 7.53 – 7.50 (m, 1H), 2.82 (s, 3H);  $^{13}\text{C NMR}$  (151 MHz,  $\text{CDCl}_3$ )  $\delta$  193.13, 166.50, 153.58, 137.44, 127.70, 126.98, 125.45, 122.44, 26.16.

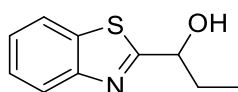

**1-(benzo[d]thiazol-2-yl)propan-1-ol (4b).** Yield = 31%; White solid;  $^1\text{H NMR}$  (600 MHz,  $\text{CDCl}_3$ )  $\delta$  7.98 (d,  $J = 8.1$  Hz, 1H), 7.88 (d,  $J = 8.0$  Hz, 1H), 7.48 – 7.46 (m, 1H), 7.39 – 7.36 (m, 1H), 5.05 (dd,  $J = 7.3, 4.9$  Hz, 1H), 3.07 (br, 1H), 2.13 – 1.92 (m, 2H), 1.06 (t,  $J = 7.4$  Hz, 3H);  $^{13}\text{C NMR}$  (151 MHz,  $\text{CDCl}_3$ )  $\delta$  176.13, 152.58, 134.78, 126.13, 125.06, 122.80, 121.84, 73.39, 31.14, 9.38.

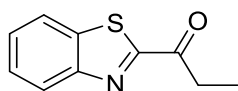



**1-(benzo[d]thiazol-2-yl)propan-1-one (4b')**. Yield = 17%; White solid;  $^1\text{H NMR}$  (600 MHz,  $\text{CDCl}_3$ )  $\delta$  8.17 (d,  $J = 8.2$  Hz, 1H), 7.97 (d,  $J = 7.8$  Hz, 1H), 7.58 – 7.55 (m, 1H), 7.53 – 7.50 (m, 1H), 3.30 (q,  $J = 7.3$  Hz, 2H), 1.30 (t,  $J = 7.3$  Hz, 3H);  $^{13}\text{C NMR}$  (151 MHz,  $\text{CDCl}_3$ )  $\delta$  195.98, 166.36, 153.59, 137.21, 127.56, 126.91, 125.36, 122.42, 32.09, 7.89.

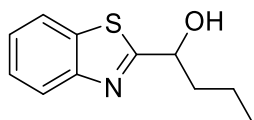

**1-(benzo[d]thiazol-2-yl)butan-1-ol (4c)**. Yield = 40%; White solid;  $^1\text{H NMR}$  (400 MHz,  $\text{CDCl}_3$ )  $\delta$  7.95 (d,  $J = 8.1$  Hz, 1H), 7.85 (d,  $J = 7.9$  Hz, 1H), 7.47 – 7.43 (m, 1H), 7.37 – 7.34 (m, 1H), 5.09 (dd,  $J = 7.9$ , 4.7 Hz, 1H), 3.35 (br, 1H), 2.06 – 1.84 (m, 2H), 1.63 – 1.44 (m, 2H), 0.96 (t,  $J = 7.4$  Hz, 3H);  $^{13}\text{C NMR}$  (101 MHz,  $\text{CDCl}_3$ )  $\delta$  176.83, 152.70, 134.73, 126.09, 125.01, 122.78, 121.84, 72.06, 40.18, 18.50, 13.83.

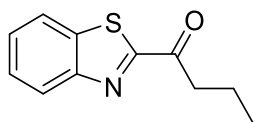

**1-(benzo[d]thiazol-2-yl)butan-1-one (4c')**. Yield = 26%; White solid;  $^1\text{H NMR}$  (400 MHz,  $\text{CDCl}_3$ )  $\delta$  8.17 (d,  $J = 8.0$  Hz, 1H), 7.95 (d,  $J = 7.9$  Hz, 1H), 7.58 – 7.48 (m, 2H), 3.24 (t,  $J = 7.4$  Hz, 2H), 1.89 – 1.79 (m, 2H), 1.04 (t,  $J = 7.1$  Hz, 3H);  $^{13}\text{C NMR}$  (101 MHz,  $\text{CDCl}_3$ )  $\delta$  195.47, 166.63, 153.59, 137.24, 127.58, 126.92, 125.38, 122.43, 40.49, 17.51, 13.79.

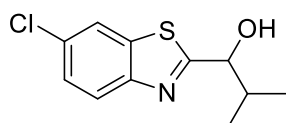

**1-(6-chlorobenzo[d]thiazol-2-yl)-2-methylpropan-1-ol (4d)**. Yield = 42%; White solid;  $^1\text{H NMR}$  (600 MHz,  $\text{CDCl}_3$ )  $\delta$  7.84 (d,  $J = 8.7$  Hz, 1H), 7.81 (d,  $J = 2.1$  Hz, 1H), 7.39 (dd,  $J = 8.7$ , 2.1 Hz, 1H), 4.85 (d,  $J = 4.9$  Hz, 1H), 3.61 (br, 1H), 2.28 – 2.20 (m, 1H), 1.03 (d,  $J = 6.9$  Hz, 3H), 0.96 (d,  $J = 6.8$  Hz, 3H);  $^{13}\text{C NMR}$  (151 MHz,  $\text{CDCl}_3$ )  $\delta$  176.64, 151.16, 135.95, 130.94, 126.84, 123.50, 121.36, 76.79, 35.13, 18.97, 16.48. **HRMS** (ESI) calcd for  $\text{C}_{11}\text{H}_{13}\text{ClNOS}$   $[\text{M}+\text{H}]^+$  : 242.0401, found 242.0400.

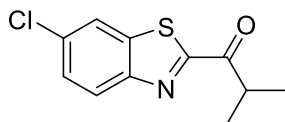

**1-(6-chlorobenzo[d]thiazol-2-yl)-2-methylpropan-1-one (4d')**. Yield = 23%; White solid;  $^1\text{H NMR}$  (600 MHz,  $\text{CDCl}_3$ )  $\delta$  8.06 (d,  $J = 8.8$  Hz, 1H), 7.93 (d,  $J = 2.0$  Hz, 1H), 7.50 (dd,  $J = 8.8, 2.1$  Hz, 1H), 3.92 (hept,  $J = 6.9$  Hz, 1H), 1.31 (d,  $J = 7.0$  Hz, 6H);  $^{13}\text{C NMR}$  (151 MHz,  $\text{CDCl}_3$ )  $\delta$  198.86, 166.52, 152.12, 138.40, 133.85, 127.91, 126.17, 121.94, 36.40, 18.63.

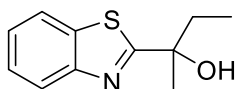

**2-(benzo[d]thiazol-2-yl)butan-2-ol (4e)**. Yield = 59%; White solid;  $^1\text{H NMR}$  (600 MHz,  $\text{CDCl}_3$ )  $\delta$  7.99 (d,  $J = 8.2$  Hz, 1H), 7.87 (d,  $J = 8.0$  Hz, 1H), 7.48 – 7.45 (m, 1H), 7.38 – 7.35 (m, 1H), 3.31 (br, 1H), 2.09 – 1.97 (m, 2H), 1.71 (s, 3H), 0.93 (t,  $J = 7.2$  Hz, 3H);  $^{13}\text{C NMR}$  (151 MHz,  $\text{CDCl}_3$ )  $\delta$  179.44, 152.89, 135.41, 126.01, 124.88, 122.84, 121.76, 76.09, 36.29, 29.14, 8.02.

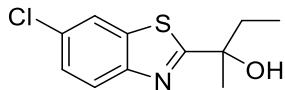

**2-(6-chlorobenzo[d]thiazol-2-yl)butan-2-ol (4e')**. Yield = 78%; Yellow oil;  $^1\text{H NMR}$  (400 MHz,  $\text{CDCl}_3$ )  $\delta$  7.88 (d,  $J = 8.7$  Hz, 1H), 7.84 (d,  $J = 2.1$  Hz, 1H), 7.42 (dd,  $J = 8.7, 2.1$  Hz, 1H), 2.90 (br, 1H), 2.11 – 1.93 (m, 2H), 1.69 (s, 3H), 0.92 (t,  $J = 7.4$  Hz, 3H);  $^{13}\text{C NMR}$  (101 MHz,  $\text{CDCl}_3$ )  $\delta$  180.11, 151.60, 136.61, 130.79, 126.77, 123.60, 121.35, 76.16, 36.18, 28.94, 7.95.

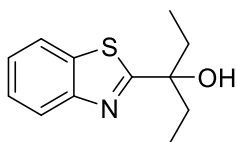

**3-(benzo[d]thiazol-2-yl)pentan-3-ol (4f)**. Yield = 61%; Colorless oil;  $^1\text{H NMR}$  (600 MHz,  $\text{CDCl}_3$ )  $\delta$  8.00 (d,  $J = 8.2$  Hz, 1H), 7.88 (d,  $J = 8.0$  Hz, 1H), 7.50 – 7.44 (m, 1H), 7.40 – 7.34 (m, 1H), 3.38 (br, 1H), 2.00 (dq,  $J = 14.1, 7.1$  Hz, 4H), 0.88 (t,  $J = 7.4$  Hz, 6H);  $^{13}\text{C NMR}$  (151 MHz,  $\text{CDCl}_3$ )  $\delta$  178.32, 152.69, 135.59, 125.95, 124.83, 122.83, 121.75, 78.73, 35.14, 7.72. **HRMS** (ESI) calcd for  $\text{C}_{12}\text{H}_{16}\text{NOS}$   $[\text{M}+\text{H}]^+$  : 222.0947, found 222.0955.

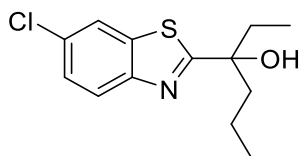

**3-(6-chlorobenzo[d]thiazol-2-yl)hexan-3-ol (4g).** Yield = 43%; Colorless oil;  $^1\text{H NMR}$  (600 MHz,  $\text{CDCl}_3$ )  $\delta$  7.89 (d,  $J = 8.7$  Hz, 1H), 7.84 (d,  $J = 2.0$  Hz, 1H), 7.42 (dd,  $J = 8.7, 2.1$  Hz, 1H), 3.12 (br, 1H), 2.06 – 1.90 (m, 4H), 1.53 – 1.45 (m, 1H), 1.17 – 1.09 (m, 1H), 0.89 – 0.86 (m, 6H).  $^{13}\text{C NMR}$  (151 MHz,  $\text{CDCl}_3$ )  $\delta$  179.42, 151.40, 136.69, 130.73, 126.73, 123.56, 121.33, 78.64, 44.46, 35.30, 16.71, 14.26, 7.66. **HRMS** (ESI) calcd for  $\text{C}_{13}\text{H}_{17}\text{ClNOS}$   $[\text{M}+\text{H}]^+$  : 270.0714, found 270.0721.

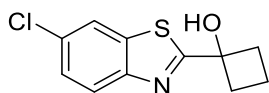

**1-(6-chlorobenzo[d]thiazol-2-yl)cyclobutan-1-ol (4h).** Yield = 52%; Pale yellow solid;  $^1\text{H NMR}$  (400 MHz,  $\text{CDCl}_3$ )  $\delta$  7.90 (d,  $J = 8.7$  Hz, 1H), 7.84 (d,  $J = 2.0$  Hz, 1H), 7.43 (dd,  $J = 8.7, 2.1$  Hz, 1H), 3.23 (br, 1H), 2.80 – 2.71 (m, 2H), 2.56 – 2.47 (m, 2H), 2.14 – 2.01 (m, 2H);  $^{13}\text{C NMR}$  (151 MHz,  $\text{CDCl}_3$ )  $\delta$  178.52, 151.35, 136.41, 130.91, 126.92, 123.62, 121.40, 76.74, 37.82, 12.81. **HRMS** (ESI) calcd for  $\text{C}_{11}\text{H}_{11}\text{ClNOS}$   $[\text{M}+\text{H}]^+$  : 240.0244, found 240.0253.

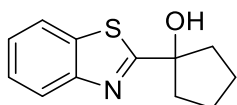

**1-(benzo[d]thiazol-2-yl)cyclopentan-1-ol (4i).** Yield = 54%; Pale yellow solid;  $^1\text{H NMR}$  (600 MHz,  $\text{CDCl}_3$ )  $\delta$  7.96 (d,  $J = 8.2$  Hz, 1H), 7.85 (d,  $J = 8.0$  Hz, 1H), 7.46 – 7.43 (m, 1H), 7.36 – 7.33 (m, 1H), 3.31 (br, 1H), 2.34 – 2.29 (m, 2H), 2.12 – 2.09 (m, 2H), 2.05 – 1.89 (m, 4H);  $^{13}\text{C NMR}$  (151 MHz,  $\text{CDCl}_3$ )  $\delta$  179.45, 153.16, 135.32, 126.00, 124.80, 122.75, 121.71, 83.92, 42.72, 24.24.

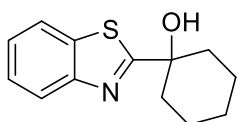

**1-(benzo[d]thiazol-2-yl)cyclohexan-1-ol (4j).** Yield = 66%; White solid;  $^1\text{H NMR}$  (600 MHz,  $\text{CDCl}_3$ )  $\delta$  8.00 (d,  $J = 8.2$  Hz, 1H), 7.88 (d,  $J = 8.0$  Hz, 1H), 7.46 – 7.43 (m, 1H), 7.36 – 7.33 (m, 1H), 3.09 (br,

1H), 2.10 – 2.05 (m, 2H), 1.98 – 1.93 (m, 2H), 1.80 – 1.66 (m, 5H), 1.42 – 1.36 (m, 1H); <sup>13</sup>C NMR (151 MHz, CDCl<sub>3</sub>) δ 180.91, 153.07, 135.08, 125.96, 124.82, 122.83, 121.77, 74.81, 38.41, 25.13, 21.73.

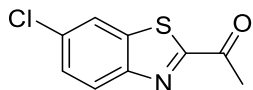

**1-(6-chlorobenzo[d]thiazol-2-yl)ethan-1-one (4k).** Yield = 41%; White solid; <sup>1</sup>H NMR (400 MHz, CDCl<sub>3</sub>) δ 8.08 (d, *J* = 8.8 Hz, 1H), 7.94 (d, *J* = 2.0 Hz, 1H), 7.52 (dd, *J* = 8.8, 2.1 Hz, 1H), 2.80 (s, 3H); <sup>13</sup>C NMR (101 MHz, CDCl<sub>3</sub>) δ 192.80, 166.92, 152.05, 138.54, 134.03, 128.06, 126.22, 122.00, 26.09.

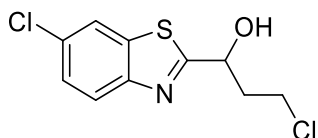

**3-chloro-1-(6-chlorobenzo[d]thiazol-2-yl)propan-1-ol (4l).** Yield = 31%; White solid; <sup>1</sup>H NMR (600 MHz, CDCl<sub>3</sub>) δ 7.88 (d, *J* = 8.7 Hz, 1H), 7.86 (d, *J* = 1.9 Hz, 1H), 7.44 (dd, *J* = 8.7, 2.0 Hz, 1H), 5.34 (dd, *J* = 9.0, 3.8 Hz, 1H), 3.89 – 3.83 (m, 1H), 3.78 – 3.74 (m, 1H), 2.86 (br, 1H), 2.51 – 2.46 (m, 1H), 2.37 – 2.32 (m, 1H); <sup>13</sup>C NMR (151 MHz, CDCl<sub>3</sub>) δ 175.61, 151.40, 135.99, 131.23, 127.12, 123.72, 121.50, 69.38, 40.78, 40.04. HRMS (ESI) calcd for C<sub>10</sub>H<sub>10</sub>Cl<sub>2</sub>NOS [M+H]<sup>+</sup> : 261.9855, found 261.9863.

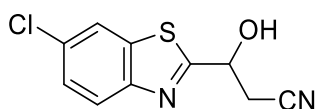

**3-(6-chlorobenzo[d]thiazol-2-yl)-3-hydroxypropanenitrile (4m).** Yield = 32%; Yellow solid; <sup>1</sup>H NMR (600 MHz, DMSO-*d*<sub>6</sub>) δ 8.28 (d, *J* = 2.1 Hz, 1H), 7.98 (d, *J* = 8.7 Hz, 1H), 7.55 (dd, *J* = 8.7, 2.2 Hz, 1H), 7.24 – 7.19 (m, 1H), 5.32 – 5.28 (m, 1H), 3.21 – 3.11 (m, 2H); <sup>13</sup>C NMR (151 MHz, DMSO-*d*<sub>6</sub>) δ 177.00, 152.18, 136.66, 130.15, 127.22, 124.34, 122.59, 118.39, 67.09, 26.15. HRMS (ESI) calcd for C<sub>10</sub>H<sub>8</sub>ClN<sub>2</sub>OS [M+H]<sup>+</sup> : 239.0040, found 239.0045.

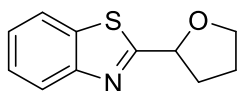

**2-(tetrahydrofuran-2-yl)benzo[d]thiazole (6a).** Yield = 55%; Yellow oil; <sup>1</sup>H NMR (600 MHz, CDCl<sub>3</sub>) δ 7.97 (d, *J* = 8.2 Hz, 1H), 7.87 (d, *J* = 8.0 Hz, 1H), 7.46 – 7.43 (m, 1H), 7.36 – 7.34 (m, 1H), 5.34 (dd,

$J = 7.8, 5.4$  Hz, 1H), 4.16 – 4.13 (m, 1H), 4.01 – 3.91 (m, 1H), 2.54 – 2.48 (m, 1H), 2.30 – 2.21 (m, 1H), 2.05 – 1.99 (m, 2H);  $^{13}\text{C}$  NMR (151 MHz,  $\text{CDCl}_3$ )  $\delta$  176.41, 153.60, 134.71, 125.94, 124.79, 122.77, 121.77, 78.75, 69.46, 33.39, 25.71.

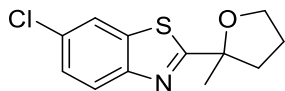

**6-chloro-2-(2-methyltetrahydrofuran-2-yl)benzo[d]thiazole (6b).** Yield = 50%; Colorless oil;  $^1\text{H}$  NMR (400 MHz,  $\text{CDCl}_3$ )  $\delta$  7.86 (d,  $J = 8.7$  Hz, 1H), 7.83 (d,  $J = 2.0$  Hz, 1H), 7.40 (dd,  $J = 8.7, 2.1$  Hz, 1H), 4.07 (dd,  $J = 7.3, 6.2$  Hz, 2H), 2.62 – 2.55 (m, 1H), 2.18 – 2.11 (m, 1H), 2.09 – 1.99 (m, 1H), 1.97 – 1.90 (m, 1H), 1.72 (s, 3H);  $^{13}\text{C}$  NMR (101 MHz,  $\text{CDCl}_3$ )  $\delta$  181.46, 152.50, 136.48, 130.57, 126.60, 123.50, 121.35, 84.92, 69.10, 39.19, 27.83, 26.15. HRMS (ESI) calcd for  $\text{C}_{12}\text{H}_{13}\text{ClNOS}$   $[\text{M}+\text{H}]^+$  : 254.0401, found 254.0409.

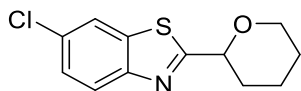

**6-chloro-2-(tetrahydro-2H-pyran-2-yl)benzo[d]thiazole (6c).** Yield = 58%; White solid;  $^1\text{H}$  NMR (600 MHz,  $\text{CDCl}_3$ )  $\delta$  7.89 (d,  $J = 8.7$  Hz, 1H), 7.87 (d,  $J = 2.0$  Hz, 1H), 7.42 (dd,  $J = 8.7, 2.1$  Hz, 1H), 4.76 (dd,  $J = 10.2, 2.6$  Hz, 1H), 4.22 – 4.16 (m, 1H), 3.69 (td,  $J = 11.5, 2.5$  Hz, 1H), 2.31 – 2.23 (m, 1H), 2.01 – 1.97 (m, 1H), 1.76 – 1.69 (m, 3H), 1.66 – 1.60 (m, 1H);  $^{13}\text{C}$  NMR (151 MHz,  $\text{CDCl}_3$ )  $\delta$  174.67, 151.47, 135.90, 130.78, 126.73, 123.61, 121.39, 77.68, 69.02, 32.35, 25.56, 22.93. HRMS (ESI) calcd for  $\text{C}_{12}\text{H}_{13}\text{ClNOS}$   $[\text{M}+\text{H}]^+$  : 254.0401, found 254.0406.

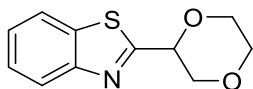

**2-(1,4-dioxan-2-yl)benzo[d]thiazole (6d).** Yield = 64%; White solid;  $^1\text{H}$  NMR (600 MHz,  $\text{CDCl}_3$ )  $\delta$  8.00 (d,  $J = 7.9$  Hz, 1H), 7.90 (d,  $J = 7.7$  Hz, 1H), 7.48 – 7.46 (m, 1H), 7.39 – 7.36 (m, 1H), 5.08 – 5.02 (m, 1H), 4.29 (d,  $J = 11.6$  Hz, 1H), 4.02 – 3.94 (m, 2H), 3.86 – 3.66 (m, 3H);  $^{13}\text{C}$  NMR (151 MHz,  $\text{CDCl}_3$ )  $\delta$  169.02, 152.98, 134.55, 126.13, 125.15, 123.11, 121.79, 75.43, 70.49, 66.99, 66.40.

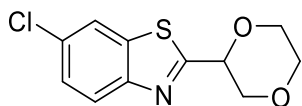

**6-chloro-2-(1,4-dioxan-2-yl)benzo[d]thiazole (6d')**. Yield = 73%; White solid;  $^1\text{H NMR}$  (400 MHz,  $\text{CDCl}_3$ )  $\delta$  7.92 – 7.87 (m, 2H), 7.44 (dd,  $J = 8.7, 2.1$  Hz, 1H), 5.03 (dd,  $J = 9.7, 3.1$  Hz, 1H), 4.29 (dd,  $J = 11.6, 3.1$  Hz, 1H), 4.05 – 3.93 (m, 2H), 3.87 – 3.73 (m, 2H), 3.69 (dd,  $J = 11.6, 9.7$  Hz, 1H);  $^{13}\text{C NMR}$  (101 MHz,  $\text{CDCl}_3$ )  $\delta$  169.67, 151.60, 135.84, 131.16, 126.96, 123.88, 121.40, 75.24, 70.33, 66.98, 66.39.

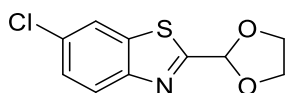

**6-chloro-2-(1,3-dioxolan-2-yl)benzo[d]thiazole (6e)**. Yield = 52%; White solid;  $^1\text{H NMR}$  (600 MHz,  $\text{CDCl}_3$ )  $\delta$  7.96 (d,  $J = 8.7$  Hz, 1H), 7.87 (d,  $J = 2.0$  Hz, 1H), 7.44 (dd,  $J = 8.7, 2.1$  Hz, 1H), 6.20 (s, 1H), 4.19 – 4.11 (m, 4H);  $^{13}\text{C NMR}$  (151 MHz,  $\text{CDCl}_3$ )  $\delta$  169.79, 151.84, 136.16, 131.72, 127.14, 124.57, 121.52, 100.32, 65.81.

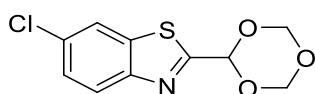

**6-chloro-2-(1,3,5-trioxan-2-yl)benzo[d]thiazole (6f)**. Yield = 77%; White solid;  $^1\text{H NMR}$  (400 MHz,  $\text{CDCl}_3$ )  $\delta$  7.98 – 7.94 (m, 1H), 7.91 – 7.88 (m, 1H), 7.47 – 7.43 (m, 1H), 6.24 – 6.21 (m, 1H), 5.42 – 5.37 (m, 2H), 5.37 – 5.32 (m, 2H);  $^{13}\text{C NMR}$  (151 MHz,  $\text{CDCl}_3$ )  $\delta$  165.99, 151.15, 136.08, 132.01, 127.31, 124.71, 121.57, 97.80, 93.40. **HRMS** (ESI) calcd for  $\text{C}_{10}\text{H}_9\text{ClNO}_3\text{S}$   $[\text{M}+\text{H}]^+$  : 257.9986, found 257.9993.

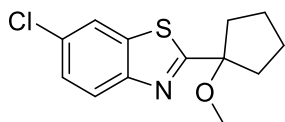

**6-chloro-2-(1-methoxycyclopentyl)benzo[d]thiazole (6g)**. Yield = 63%; Colorless oil;  $^1\text{H NMR}$  (600 MHz,  $\text{CDCl}_3$ )  $\delta$  7.88 (d,  $J = 8.7$  Hz, 1H), 7.84 (d,  $J = 2.0$  Hz, 1H), 7.40 (dd,  $J = 8.7, 2.1$  Hz, 1H), 3.24 (s, 3H), 2.26 – 2.18 (m, 4H), 1.91 – 1.82 (m, 4H);  $^{13}\text{C NMR}$  (151 MHz,  $\text{CDCl}_3$ )  $\delta$  177.96, 151.60, 137.05, 130.89, 126.57, 123.75, 121.33, 89.25, 52.31, 37.55, 23.66. **HRMS** (ESI) calcd for  $\text{C}_{13}\text{H}_{15}\text{ClNOS}$   $[\text{M}+\text{H}]^+$  : 268.0557, found 268.0559.

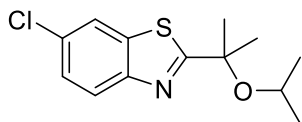

**6-chloro-2-(2-isopropoxypropan-2-yl)benzo[d]thiazole (6h).** Yield = 32%; Colorless oil;  $^1\text{H NMR}$  (600 MHz,  $\text{CDCl}_3$ )  $\delta$  7.88 (d,  $J = 8.7$  Hz, 1H), 7.83 (d,  $J = 2.1$  Hz, 1H), 7.39 (dd,  $J = 8.7, 2.1$  Hz, 1H), 3.86 (hept,  $J = 6.1$  Hz, 1H), 1.70 (s, 6H), 1.17 (d,  $J = 6.1$  Hz, 6H);  $^{13}\text{C NMR}$  (151 MHz,  $\text{CDCl}_3$ )  $\delta$  180.54, 151.50, 136.86, 130.75, 126.48, 123.73, 121.27, 78.00, 66.46, 28.19, 24.77. **HRMS** (ESI) calcd for  $\text{C}_{13}\text{H}_{17}\text{ClNOS}$   $[\text{M}+\text{H}]^+$  : 270.0714, found 270.0718.

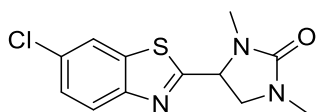

**4-(6-chlorobenzo[d]thiazol-2-yl)-1,3-dimethylimidazolidin-2-one (8a).** Yield = 68%; White solid;  $^1\text{H NMR}$  (400 MHz,  $\text{CDCl}_3$ )  $\delta$  7.81 (d,  $J = 8.7$  Hz, 1H), 7.79 (d,  $J = 2.0$  Hz, 1H), 7.36 (dd,  $J = 8.7, 2.1$  Hz, 1H), 4.81 (dd,  $J = 9.1, 7.3$  Hz, 1H), 3.75 (t,  $J = 9.2$  Hz, 1H), 3.28 (dd,  $J = 9.0, 7.3$  Hz, 1H), 2.78 (s, 3H), 2.75 (s, 3H);  $^{13}\text{C NMR}$  (101 MHz,  $\text{CDCl}_3$ )  $\delta$  172.33, 160.74, 151.47, 136.19, 131.56, 127.16, 123.90, 121.64, 58.75, 51.89, 31.16, 30.78. **HRMS** (ESI) calcd for  $\text{C}_{12}\text{H}_{13}\text{ClN}_3\text{OS}$   $[\text{M}+\text{H}]^+$  : 282.0462, found 282.0476.

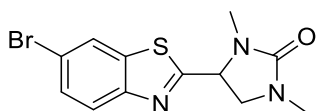

**4-(6-bromobenzo[d]thiazol-2-yl)-1,3-dimethylimidazolidin-2-one (8b).** Yield = 76%; White solid;  $^1\text{H NMR}$  (400 MHz,  $\text{CDCl}_3$ )  $\delta$  8.05 (d,  $J = 1.9$  Hz, 1H), 7.86 (d,  $J = 8.7$  Hz, 1H), 7.62 (dd,  $J = 8.7, 1.9$  Hz, 1H), 4.90 (dd,  $J = 9.3, 7.2$  Hz, 1H), 3.84 (t,  $J = 9.2$  Hz, 1H), 3.36 (dd,  $J = 9.2, 7.2$  Hz, 1H), 2.87 (s, 3H), 2.84 (s, 3H);  $^{13}\text{C NMR}$  (101 MHz,  $\text{CDCl}_3$ )  $\delta$  172.66, 160.83, 151.61, 136.60, 130.07, 124.68, 124.25, 119.48, 58.79, 51.97, 31.22, 30.89. **HRMS** (ESI) calcd for  $\text{C}_{12}\text{H}_{13}\text{BrN}_3\text{OS}$   $[\text{M}+\text{H}]^+$  : 327.9937, found 327.9937.

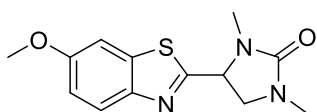

**4-(6-methoxybenzo[d]thiazol-2-yl)-1,3-dimethylimidazolidin-2-one (8c).** Yield = 51%; White solid;

**<sup>1</sup>H NMR** (600 MHz, CDCl<sub>3</sub>) δ 7.86 (d, *J* = 8.9 Hz, 1H), 7.33 (d, *J* = 2.5 Hz, 1H), 7.08 (dd, *J* = 8.9, 2.5 Hz, 1H), 4.86 (dd, *J* = 9.2, 7.4 Hz, 1H), 3.87 (s, 3H), 3.80 (t, *J* = 9.2 Hz, 1H), 3.35 (dd, *J* = 9.2, 7.4 Hz, 1H), 2.85 (s, 3H), 2.81 (s, 3H); **<sup>13</sup>C NMR** (151 MHz, CDCl<sub>3</sub>) δ 168.84, 160.91, 158.07, 147.22, 136.46, 123.63, 115.89, 104.37, 58.84, 55.84, 52.12, 31.20, 30.66. **HRMS** (ESI) calcd for C<sub>13</sub>H<sub>16</sub>N<sub>3</sub>O<sub>2</sub>S [M+H]<sup>+</sup> : 278.0958, found 278.0960.

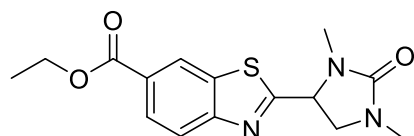

**ethyl 2-(1,3-dimethyl-2-oxoimidazolidin-4-yl)benzo[d]thiazole-6-carboxylate (8d)**. Yield = 74%; White solid; **<sup>1</sup>H NMR** (600 MHz, CDCl<sub>3</sub>) δ 8.58 (d, *J* = 1.4 Hz, 1H), 8.12 (dd, *J* = 8.6, 1.6 Hz, 1H), 7.97 (d, *J* = 8.6 Hz, 1H), 4.88 (dd, *J* = 9.3, 7.1 Hz, 1H), 4.37 (q, *J* = 7.1 Hz, 2H), 3.81 (t, *J* = 9.3 Hz, 1H), 3.34 (dd, *J* = 9.2, 7.1 Hz, 1H), 2.82 (s, 3H), 2.81 (s, 3H), 1.37 (t, *J* = 7.1 Hz, 3H); **<sup>13</sup>C NMR** (151 MHz, CDCl<sub>3</sub>) δ 175.41, 165.80, 160.75, 155.76, 134.89, 127.80, 127.48, 124.13, 122.85, 61.34, 58.91, 51.90, 31.13, 30.84, 14.31. **HRMS** (ESI) calcd for C<sub>15</sub>H<sub>18</sub>N<sub>3</sub>O<sub>3</sub>S [M+H]<sup>+</sup> : 320.1063, found 320.1064.

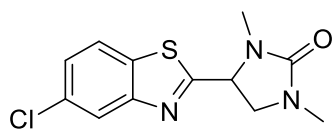

**4-(5-chlorobenzo[d]thiazol-2-yl)-1,3-dimethylimidazolidin-2-one (8e)**. Yield = 65%; White solid; **<sup>1</sup>H NMR** (600 MHz, CDCl<sub>3</sub>) δ 7.96 (d, *J* = 1.9 Hz, 1H), 7.80 (d, *J* = 8.6 Hz, 1H), 7.38 (dd, *J* = 8.6, 2.0 Hz, 1H), 4.88 (dd, *J* = 9.3, 7.1 Hz, 1H), 3.82 (t, *J* = 9.3 Hz, 1H), 3.34 (dd, *J* = 9.2, 7.1 Hz, 1H), 2.85 (s, 3H), 2.83 (s, 3H); **<sup>13</sup>C NMR** (151 MHz, CDCl<sub>3</sub>) δ 173.90, 160.81, 153.83, 133.28, 132.45, 126.20, 123.05, 122.79, 58.84, 51.99, 31.18, 30.82. **HRMS** (ESI) calcd for C<sub>12</sub>H<sub>13</sub>ClN<sub>3</sub>OS [M+H]<sup>+</sup> : 282.0462, found 282.0468.

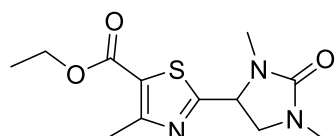

**ethyl 2-(1,3-dimethyl-2-oxoimidazolidin-4-yl)-4-methylthiazole-5-carboxylate (8f)**. Yield = 48%;



White solid;  $^1\text{H NMR}$  (600 MHz,  $\text{CDCl}_3$ )  $\delta$  4.70 (dd,  $J = 9.1, 7.0$  Hz, 1H), 4.30 (q,  $J = 7.1$  Hz, 2H), 3.74 (t,  $J = 9.2$  Hz, 1H), 3.23 (dd,  $J = 6.5, 2.5$  Hz, 1H), 2.81 (s, 3H), 2.79 (s, 3H), 2.68 (s, 3H), 1.33 (t,  $J = 7.1$  Hz, 3H);  $^{13}\text{C NMR}$  (151 MHz,  $\text{CDCl}_3$ )  $\delta$  173.31, 161.83, 160.74, 160.10, 123.04, 61.41, 58.33, 52.34, 31.13, 30.65, 17.25, 14.25. **HRMS** (ESI) calcd for  $\text{C}_{12}\text{H}_{18}\text{N}_3\text{O}_3\text{S}$   $[\text{M}+\text{H}]^+$  : 284.1063, found 284.1069.

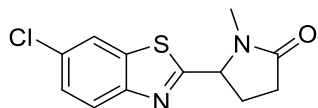

**5-(6-chlorobenzothiazol-2-yl)-1-methylpyrrolidin-2-one (8g)**. Yield = 44%; White solid;  $^1\text{H NMR}$  (600 MHz,  $\text{CDCl}_3$ )  $\delta$  7.88 (d,  $J = 8.7$  Hz, 1H), 7.85 (d,  $J = 2.0$  Hz, 1H), 7.44 (dd,  $J = 8.7, 2.1$  Hz, 1H), 4.98 (dd,  $J = 8.7, 4.2$  Hz, 1H), 2.85 (s, 3H), 2.68 – 2.58 (m, 2H), 2.50 – 2.43 (m, 1H), 2.21 – 2.14 (m, 1H);  $^{13}\text{C NMR}$  (151 MHz,  $\text{CDCl}_3$ )  $\delta$  175.07, 172.87, 151.59, 136.00, 131.65, 127.30, 124.02, 121.60, 62.65, 29.29, 28.94, 26.60. **HRMS** (ESI) calcd for  $\text{C}_{12}\text{H}_{12}\text{ClN}_2\text{OS}$   $[\text{M}+\text{H}]^+$  : 267.0353, found 267.0358.

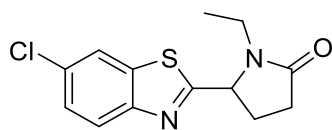

**5-(6-chlorobenzothiazol-2-yl)-1-ethylpyrrolidin-2-one (8h)**. Yield = 46%; White solid;  $^1\text{H NMR}$  (600 MHz,  $\text{CDCl}_3$ )  $\delta$  7.90 (d,  $J = 8.7$  Hz, 1H), 7.86 (d,  $J = 2.0$  Hz, 1H), 7.46 (dd,  $J = 8.7, 2.1$  Hz, 1H), 5.13 (dd,  $J = 8.6, 3.9$  Hz, 1H), 3.81 (dq,  $J = 14.6, 7.3$  Hz, 1H), 2.96 – 2.90 (m, 1H), 2.71 – 2.59 (m, 2H), 2.52 – 2.46 (m, 1H), 2.22 – 2.17 (m, 1H), 1.09 (t,  $J = 7.2$  Hz, 3H);  $^{13}\text{C NMR}$  (151 MHz,  $\text{CDCl}_3$ )  $\delta$  174.72, 173.31, 151.55, 136.03, 131.67, 127.30, 124.02, 121.60, 59.86, 36.43, 29.61, 26.80, 12.45. **HRMS** (ESI) calcd for  $\text{C}_{13}\text{H}_{14}\text{ClN}_2\text{OS}$   $[\text{M}+\text{H}]^+$  : 281.0510, found 281.0515.

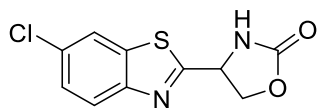

**4-(6-chlorobenzothiazol-2-yl)oxazolidin-2-one (8i)**. Yield = 63%; Yellow solid;  $^1\text{H NMR}$  (600 MHz,  $\text{DMSO}-d_6$ )  $\delta$  8.76 (s, 1H), 8.33 – 8.30 (m, 1H), 8.00 (d,  $J = 8.7$  Hz, 1H), 7.58 (dd,  $J = 8.7, 2.0$  Hz, 1H), 5.41 (ddd,  $J = 9.0, 4.7, 1.4$  Hz, 1H), 4.78 (t,  $J = 8.9$  Hz, 1H), 4.41 (dd,  $J = 8.8, 4.8$  Hz, 1H);  $^{13}\text{C NMR}$  (151 MHz,  $\text{DMSO}-d_6$ )  $\delta$  174.62, 158.90, 152.09, 136.35, 130.49, 127.51, 124.49, 122.80, 69.76, 54.15. **HRMS** (ESI) calcd for  $\text{C}_{10}\text{H}_8\text{ClN}_2\text{O}_2\text{S}$   $[\text{M}+\text{H}]^+$  : 254.9990, found 255.0001.

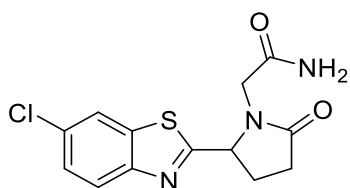

**2-(2-(6-chlorobenzo[d]thiazol-2-yl)-5-oxopyrrolidin-1-yl)acetamide (8j).** Yield = 28%; White solid; <sup>1</sup>H NMR (600 MHz, DMSO-*d*<sub>6</sub>) δ 8.30 (d, *J* = 2.1 Hz, 1H), 8.00 (d, *J* = 8.7 Hz, 1H), 7.57 (dd, *J* = 8.7, 2.2 Hz, 1H), 7.39 (s, 1H), 7.10 (s, 1H), 5.22 (dd, *J* = 8.6, 4.6 Hz, 1H), 4.23 (d, *J* = 16.9 Hz, 1H), 3.33 (d, *J* = 16.9 Hz, 1H), 2.68 – 2.61 (m, 1H), 2.54 – 2.40 (m, 2H), 2.12 – 2.07 (m, 1H); <sup>13</sup>C NMR (151 MHz, DMSO-*d*<sub>6</sub>) δ 175.38, 174.15, 169.40, 151.91, 136.55, 130.50, 127.41, 124.51, 122.71, 60.39, 43.90, 29.25, 26.72. **HRMS** (ESI) calcd for C<sub>13</sub>H<sub>13</sub>ClN<sub>3</sub>O<sub>2</sub>S [M+H]<sup>+</sup> : 310.0412, found 310.0420.

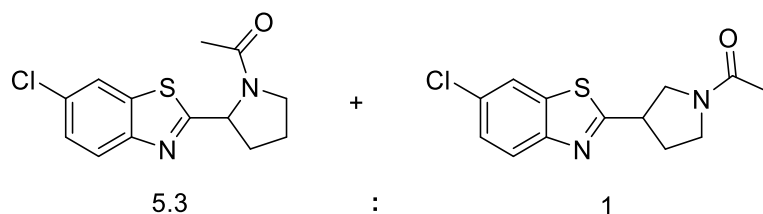

**1-(2-(6-chlorobenzo[d]thiazol-2-yl)pyrrolidin-1-yl)ethan-1-one, 1:0.54 rotamers (8k) and 1-(3-(6-chlorobenzo[d]thiazol-2-yl)pyrrolidin-1-yl)ethan-1-one (8k').** Yield = 22%; Colorless oil; <sup>1</sup>H NMR (600 MHz, CDCl<sub>3</sub>) δ 8.08 (d, *J* = 8.8 Hz, 0.29H), 7.96 (d, *J* = 1.9 Hz, 0.29H), 7.90 – 7.86 (m, 1.54H), 7.85 (d, *J* = 2.0 Hz, 0.54H), 7.78 (d, *J* = 2.0 Hz, 1H), 7.54 (dd, *J* = 8.8, 2.1 Hz, 0.29H), 7.46 (dd, *J* = 8.7, 2.1 Hz, 0.54H), 7.40 (dd, *J* = 8.7, 2.1 Hz, 1H), 5.53 (dd, *J* = 8.1, 2.0 Hz, 1H), 5.29 (dd, *J* = 8.2, 1.9 Hz, 0.54H), 4.32 (dd, *J* = 7.5, 4.7 Hz, 0.29H), 3.82 – 3.74 (m, 1.54H), 3.72 – 3.65 (m, 0.58H), 3.62 – 3.52 (m, 1.54H), 3.51 – 3.49 (m, 0.29H), 3.41 – 3.37 (m, 0.29H), 2.69 – 2.63 (m, 0.29H), 2.55 – 2.49 (m, 0.29H), 2.47 – 2.43 (m, 1.08H), 2.37 – 2.28 (m, 2H), 2.23 – 2.18 (m, 1.08H), 2.16 (s, 3H), 2.12 – 2.07 (m, 2H), 2.01 (s, 1.62H), 1.96 (s, 0.87H); <sup>13</sup>C NMR (151 MHz, CDCl<sub>3</sub>) δ 175.30, 174.54, 173.30, 170.26, 170.15, 170.09, 152.13, 151.98, 151.67, 138.28, 136.23, 135.89, 134.29, 131.38, 130.81, 128.26, 127.27, 126.73, 126.36, 123.84, 123.63, 122.01, 121.49, 121.15, 61.00, 58.74, 53.86, 48.10, 46.64, 39.83, 38.79, 34.92, 34.24, 31.99, 24.55, 23.30, 22.74, 22.60, 22.48. **HRMS** (ESI) calcd for C<sub>13</sub>H<sub>14</sub>ClN<sub>2</sub>OS [M+H]<sup>+</sup> : 281.0510, found 281.0522.

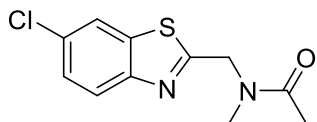

**N-((6-chlorobenzo[d]thiazol-2-yl)methyl)-N-methylacetamide, 1:0.3 rotamers (8l).** Yield = 18%; Yellow solid;  $^1\text{H NMR}$  (600 MHz,  $\text{CDCl}_3$ )  $\delta$  7.91 – 7.86 (m, 1+0.3H), 7.85 (d,  $J = 2.0$  Hz, 0.3H), 7.81 (d,  $J = 2.0$  Hz, 1H), 7.45 (dd,  $J = 8.7, 2.0$  Hz, 0.3H), 7.42 (dd,  $J = 8.7, 2.1$  Hz, 1H), 4.93 (s, 2H), 4.85 (s, 0.6H), 3.12 (s, 3H), 3.08 (s, 0.9H), 2.21 (s, 0.9H), 2.18 (s, 3H);  $^{13}\text{C NMR}$  (151 MHz,  $\text{CDCl}_3$ )  $\delta$  170.99, 170.81, 168.65, 168.43, 151.87, 151.20, 136.89, 136.02, 131.56, 131.23, 127.31, 126.90, 123.91, 123.67, 121.49, 121.33, 53.00, 49.39, 36.51, 34.45, 21.54, 21.50.

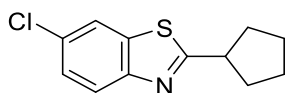

**6-chloro-2-cyclopentylbenzo[d]thiazole (10a).** Yield = 52%; Yellow solid;  $^1\text{H NMR}$  (600 MHz,  $\text{CDCl}_3$ )  $\delta$  7.85 (d,  $J = 8.7$  Hz, 1H), 7.79 (d,  $J = 2.1$  Hz, 1H), 7.39 (dd,  $J = 8.7, 2.1$  Hz, 1H), 3.55 – 3.50 (m, 1H), 2.30 – 2.19 (m, 2H), 1.98 – 1.82 (m, 4H), 1.79 – 1.70 (m, 2H);  $^{13}\text{C NMR}$  (151 MHz,  $\text{CDCl}_3$ )  $\delta$  177.73, 151.66, 136.00, 130.43, 126.60, 123.19, 121.10, 44.73, 34.00, 22.59. **HRMS** (ESI) calcd for  $\text{C}_{12}\text{H}_{13}\text{ClNS}$   $[\text{M}+\text{H}]^+$  : 238.0452, found 238.0457.

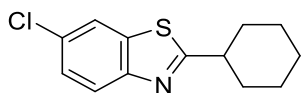

**6-chloro-2-cyclohexylbenzo[d]thiazole (10b).** Yield = 58%; Yellow solid;  $^1\text{H NMR}$  (600 MHz,  $\text{CDCl}_3$ )  $\delta$  7.87 (d,  $J = 8.7$  Hz, 1H), 7.81 (d,  $J = 1.8$  Hz, 1H), 7.39 (dd,  $J = 8.6, 1.7$  Hz, 1H), 3.11 – 3.06 (m, 1H), 2.21 – 2.18 (m, 2H), 1.90 – 1.87 (m, 2H), 1.78 – 1.75 (m, 1H), 1.65 – 1.59 (m, 2H), 1.48 – 1.40 (m, 2H), 1.35 – 1.27 (m, 1H);  $^{13}\text{C NMR}$  (151 MHz,  $\text{CDCl}_3$ )  $\delta$  178.26, 151.48, 135.69, 130.47, 126.63, 123.24, 121.17, 43.36, 33.33, 26.00, 25.73.

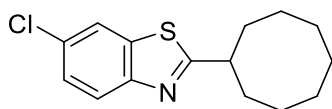

**6-chloro-2-cyclooctylbenzo[d]thiazole (10c);** Yield = 44%; Yellow oil;  $^1\text{H NMR}$  (600 MHz,  $\text{CDCl}_3$ )  $\delta$  7.86 (d,  $J = 8.7$  Hz, 1H), 7.81 – 7.79 (m, 1H), 7.41 – 7.37 (m, 1H), 3.38 – 3.33 (m, 1H), 2.17 – 2.12 (m,

2H), 1.99 – 1.91 (m, 2H), 1.85 – 1.78 (m, 2H), 1.68 – 1.60 (m, 8H);  $^{13}\text{C}$  NMR (151 MHz,  $\text{CDCl}_3$ )  $\delta$  179.68, 151.51, 135.92, 130.38, 126.55, 123.25, 121.11, 43.68, 32.79, 26.89, 26.09, 25.38. HRMS (ESI) calcd for  $\text{C}_{15}\text{H}_{19}\text{ClNS}$   $[\text{M}+\text{H}]^+$  : 280.0921, found 280.0928.

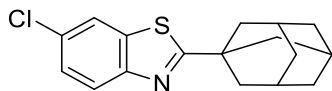

**2-(adamantan-1-yl)-6-chlorobenzo[d]thiazole (10d).** Yield = 65%; White solid;  $^1\text{H}$  NMR (400 MHz,  $\text{CDCl}_3$ )  $\delta$  7.88 (d,  $J = 8.7$  Hz, 1H), 7.81 (d,  $J = 2.0$  Hz, 1H), 7.38 (dd,  $J = 8.7, 2.1$  Hz, 1H), 2.12 (s, 8H), 2.04 – 1.94 (m, 1H), 1.81 (s, 6H);  $^{13}\text{C}$  NMR (101 MHz,  $\text{CDCl}_3$ )  $\delta$  182.72, 151.74, 135.63, 130.26, 126.45, 123.40, 121.17, 42.94, 40.28, 38.46, 37.50, 36.47, 32.58, 32.51, 28.53, 27.80, 27.54. HRMS (ESI) calcd for  $\text{C}_{17}\text{H}_{19}\text{ClNS}$   $[\text{M}+\text{H}]^+$  : 304.0921, found 304.0929.

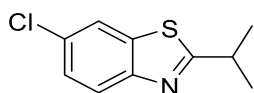

**6-chloro-2-isopropylbenzo[d]thiazole (11a).** Yield = 62%; Yellow oil;  $^1\text{H}$  NMR (400 MHz,  $\text{CDCl}_3$ )  $\delta$  7.88 (d,  $J = 8.7$  Hz, 1H), 7.82 (d,  $J = 2.0$  Hz, 1H), 7.41 (dd,  $J = 8.7, 2.1$  Hz, 1H), 3.41 (hept,  $J = 7.0$  Hz, 1H), 1.48 (d,  $J = 6.9$  Hz, 6H);  $^{13}\text{C}$  NMR (151 MHz,  $\text{CDCl}_3$ )  $\delta$  179.38, 151.35, 135.77, 130.61, 126.74, 123.24, 121.20, 34.05, 22.81.

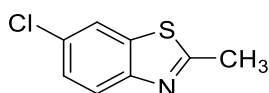

**6-chloro-2-methylbenzo[d]thiazole (11b).** Yield = 41%; Pale yellow solid;  $^1\text{H}$  NMR (600 MHz,  $\text{CDCl}_3$ )  $\delta$  7.86 (d,  $J = 8.7$  Hz, 1H), 7.80 (d,  $J = 2.0$  Hz, 1H), 7.41 (dd,  $J = 8.7, 2.1$  Hz, 1H), 2.83 (s, 3H);  $^{13}\text{C}$  NMR (151 MHz,  $\text{CDCl}_3$ )  $\delta$  167.62, 151.68, 136.72, 130.72, 126.77, 123.06, 121.05, 20.06.

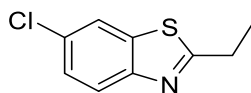

**6-chloro-2-ethylbenzo[d]thiazole (11c).** Yield = 53%; Yellow solid;  $^1\text{H}$  NMR (600 MHz,  $\text{CDCl}_3$ )  $\delta$  7.86 (d,  $J = 8.7$  Hz, 1H), 7.80 (d,  $J = 2.1$  Hz, 1H), 7.40 (dd,  $J = 8.7, 2.1$  Hz, 1H), 3.13 (q,  $J = 7.5$  Hz, 2H),

1.46 (t,  $J = 7.6$  Hz, 3H);  $^{13}\text{C NMR}$  (151 MHz,  $\text{CDCl}_3$ )  $\delta$  174.12, 151.72, 136.22, 130.57, 126.68, 123.20, 121.12, 27.74, 13.64.

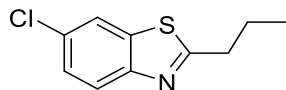

**6-chloro-2-propylbenzo[d]thiazole (11d).** Yield = 45%; Yellow solid;  $^1\text{H NMR}$  (600 MHz,  $\text{CDCl}_3$ )  $\delta$  7.86 (d,  $J = 8.7$  Hz, 1H), 7.80 (d,  $J = 2.0$  Hz, 1H), 7.40 (dd,  $J = 8.7, 2.0$  Hz, 1H), 3.07 (t,  $J = 7.6$  Hz, 2H), 1.93 – 1.87 (m, 2H), 1.05 (t,  $J = 7.4$  Hz, 3H);  $^{13}\text{C NMR}$  (151 MHz,  $\text{CDCl}_3$ )  $\delta$  172.76, 151.75, 136.32, 130.57, 126.65, 123.22, 121.10, 36.19, 22.98, 13.69.

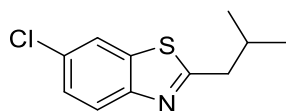

**6-chloro-2-isobutylbenzo[d]thiazole (11e).** Yield = 40%; Yellow oil;  $^1\text{H NMR}$  (600 MHz,  $\text{CDCl}_3$ )  $\delta$  7.88 (d,  $J = 8.6$  Hz, 1H), 7.81 (d,  $J = 2.0$  Hz, 1H), 7.41 (dd,  $J = 8.7, 2.0$  Hz, 1H), 2.97 (d,  $J = 7.2$  Hz, 2H), 2.25 – 2.18 (m, 1H), 1.04 (d,  $J = 6.6$  Hz, 6H);  $^{13}\text{C NMR}$  (151 MHz,  $\text{CDCl}_3$ )  $\delta$  171.92, 151.72, 136.41, 130.61, 126.66, 123.27, 121.08, 43.18, 29.71, 22.38. **HRMS** (ESI) calcd for  $\text{C}_{11}\text{H}_{13}\text{ClNS}$   $[\text{M}+\text{H}]^+$  : 226.0452, found 226.0462.

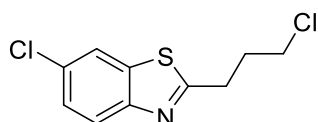

**6-chloro-2-(3-chloropropyl)benzo[d]thiazole (11f).** Yield = 30%; White solid;  $^1\text{H NMR}$  (600 MHz,  $\text{CDCl}_3$ )  $\delta$  7.88 (d,  $J = 8.7$  Hz, 1H), 7.82 (d,  $J = 2.1$  Hz, 1H), 7.42 (dd,  $J = 8.6, 2.1$  Hz, 1H), 3.68 (t,  $J = 6.3$  Hz, 2H), 3.29 (t,  $J = 7.4$  Hz, 2H), 2.37 (dt,  $J = 13.6, 6.5$  Hz, 2H);  $^{13}\text{C NMR}$  (151 MHz,  $\text{CDCl}_3$ )  $\delta$  170.60, 151.70, 136.24, 130.91, 126.88, 123.34, 121.16, 43.73, 31.65, 31.14.

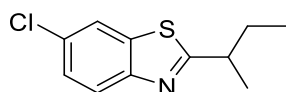

**2-(sec-butyl)-6-chlorobenzo[d]thiazole (11g).** Yield = 42%; Yellow oil;  $^1\text{H NMR}$  (600 MHz,  $\text{CDCl}_3$ )  $\delta$  7.88 (d,  $J = 8.7$  Hz, 1H), 7.82 (d,  $J = 2.0$  Hz, 1H), 7.40 (dd,  $J = 8.7, 2.0$  Hz, 1H), 3.23 – 3.17 (m, 1H),

1.94 – 1.74 (m, 2H), 1.44 (d,  $J = 6.9$  Hz, 3H), 0.97 (t,  $J = 7.4$  Hz, 3H);  $^{13}\text{C}$  NMR (151 MHz,  $\text{CDCl}_3$ )  $\delta$  178.49, 151.55, 135.87, 130.51, 126.60, 123.30, 121.17, 41.04, 30.53, 20.56, 11.77. HRMS (ESI) calcd for  $\text{C}_{11}\text{H}_{13}\text{ClNS}$   $[\text{M}+\text{H}]^+$  : 226.0452, found 226.0458.

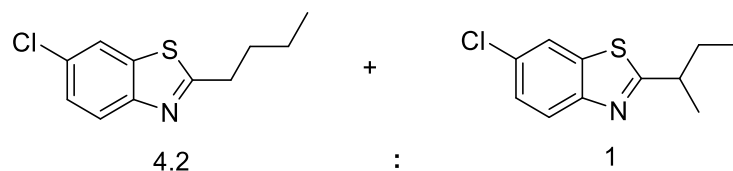

**2-butyl-6-chlorobenzo[d]thiazole (11i)** and **2-(sec-butyl)-6-chlorobenzo[d]thiazole (11i')**. Yield = 38%; Yellow oil;  $^1\text{H}$  NMR (400 MHz,  $\text{CDCl}_3$ )  $\delta$  7.88 – 7.85 (m, 1H+0.24H), 7.82 – 7.80 (m, 1H+0.24H), 7.40 (dd,  $J = 8.7, 2.1$  Hz, 1H+0.24H), 3.24 – 3.15 (m, 0.24H), 3.10 (t,  $J = 8.0$  Hz, 2H), 1.93 – 1.73 (m, 2H+0.48H), 1.51 – 1.41 (m, 2H+0.72H), 0.97 (t,  $J = 7.4$  Hz, 3H+0.72H);  $^{13}\text{C}$  NMR (101 MHz,  $\text{CDCl}_3$ )  $\delta$  178.55, 173.07, 151.67, 151.51, 136.27, 135.84, 130.55, 130.49, 126.68, 126.62, 123.29, 123.18, 121.20, 121.12, 41.05, 34.02, 31.67, 30.58, 22.31, 20.62, 13.79, 11.82. HRMS (ESI) calcd for  $\text{C}_{11}\text{H}_{13}\text{ClNS}$   $[\text{M}+\text{H}]^+$  : 226.0452, found 226.0453.

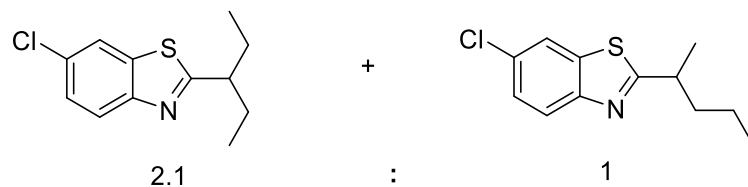

**6-chloro-2-(pentan-3-yl)benzo[d]thiazole (11j)** and **6-chloro-2-(pentan-2-yl)benzo[d]thiazole (11j')**. Yield = 43%; Yellow oil;  $^1\text{H}$  NMR (400 MHz,  $\text{CDCl}_3$ )  $\delta$  7.90 – 7.86 (m, 1H+0.48H), 7.83 – 7.82 (m, 1H+0.48H), 7.42 – 7.39 (m, 1H+0.48H), 3.33 – 3.24 (m, 0.48H), 3.02 – 2.94 (m, 1H), 1.89 – 1.72 (m, 4H), 1.76 – 1.65 (m, 0.95H), 1.44 (d,  $J = 6.9$  Hz, 1.43H), 1.41 – 1.32 (m, 0.95H), 0.94 – 0.90 (m, 6H+1.43H);  $^{13}\text{C}$  NMR (101 MHz,  $\text{CDCl}_3$ )  $\delta$  178.77, 177.57, 151.51, 151.47, 135.90, 135.83, 130.51, 130.49, 126.61, 126.57, 123.31, 123.29, 121.20, 48.69, 39.73, 39.28, 28.93, 21.07, 20.50, 13.98, 11.92. HRMS (ESI) calcd for  $\text{C}_{12}\text{H}_{15}\text{ClNS}$   $[\text{M}+\text{H}]^+$  : 240.0608, found 240.0614.

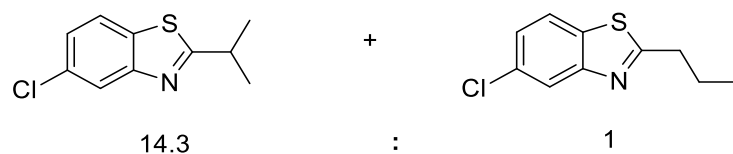

**6-chloro-2-isopropylbenzo[d]thiazole (11k)** and **6-chloro-2-propylbenzo[d]thiazole (11k')**. Yield = 56%; Pale yellow solid;  $^1\text{H NMR}$  (400 MHz,  $\text{CDCl}_3$ )  $\delta$  7.95 – 7.93 (m, 1H+0.07H), 7.73 – 7.70 (m, 1H+0.07H), 7.29 (dd,  $J = 8.5, 2.0$  Hz, 1H+0.07H), 3.40 (hept,  $J = 6.9$  Hz, 1H), 3.07 (t,  $J = 7.6$  Hz, 0.14H), 1.94 – 1.84 (m, 0.14H), 1.46 (d,  $J = 6.9$  Hz, 6H), 1.04 (t,  $J = 7.4$  Hz, 0.21H);  $^{13}\text{C NMR}$  (101 MHz,  $\text{CDCl}_3$ )  $\delta$  180.66, 174.25, 154.08, 154.01, 133.39, 132.97, 131.88, 131.83, 125.11, 125.05, 122.48, 122.40, 122.24, 122.17, 36.29, 34.19, 23.05, 22.83, 13.72. **HRMS** (ESI) calcd for  $\text{C}_{10}\text{H}_{11}\text{ClNS}$   $[\text{M}+\text{H}]^+$  : 212.0295, found 212.0299.

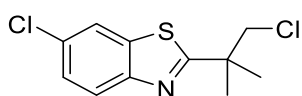

**6-chloro-2-(1-chloro-2-methylpropan-2-yl)benzo[d]thiazole (16)**. Yield = 16%; Yellow oil;  $^1\text{H NMR}$  (600 MHz,  $\text{CDCl}_3$ )  $\delta$  7.91 (d,  $J = 8.7$  Hz, 1H), 7.85 (d,  $J = 2.0$  Hz, 1H), 7.43 (dd,  $J = 8.7, 2.1$  Hz, 1H), 3.89 (s, 2H), 1.60 (s, 6H);  $^{13}\text{C NMR}$  (151 MHz,  $\text{CDCl}_3$ )  $\delta$  177.77, 151.64, 136.05, 130.88, 126.84, 123.70, 121.14, 54.26, 43.17, 26.45. **HRMS** (ESI) calcd for  $\text{C}_{11}\text{H}_{12}\text{Cl}_2\text{NS}$   $[\text{M}+\text{H}]^+$  : 260.0062, found 260.0073.

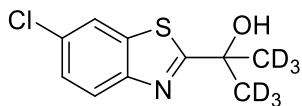

**2-(6-chlorobenzothiazol-2-yl)propan-1,1,3,3-d<sub>6</sub>-2-ol (3a-d<sub>6</sub>)**. Yield = 43%; White solid;  $^1\text{H NMR}$  (600 MHz,  $\text{CDCl}_3$ )  $\delta$  7.88 (d,  $J = 8.7$  Hz, 1H), 7.86 (d,  $J = 2.1$  Hz, 1H), 7.43 (dd,  $J = 8.7, 2.1$  Hz, 1H), 2.70 (br, 1H);  $^{13}\text{C NMR}$  (151 MHz,  $\text{CDCl}_3$ )  $\delta$  180.65, 151.71, 136.54, 130.82, 126.85, 123.64, 121.40, 73.45, 29.66. **HRMS** (ESI) calcd for  $\text{C}_{10}\text{H}_5\text{D}_6\text{ClNOS}$   $[\text{M}+\text{H}]^+$  : 234.0621, found 234.0623.

## 6. NMR spectra

### $^1\text{H}$ NMR (600 MHz, $\text{CDCl}_3$ ) of 3a

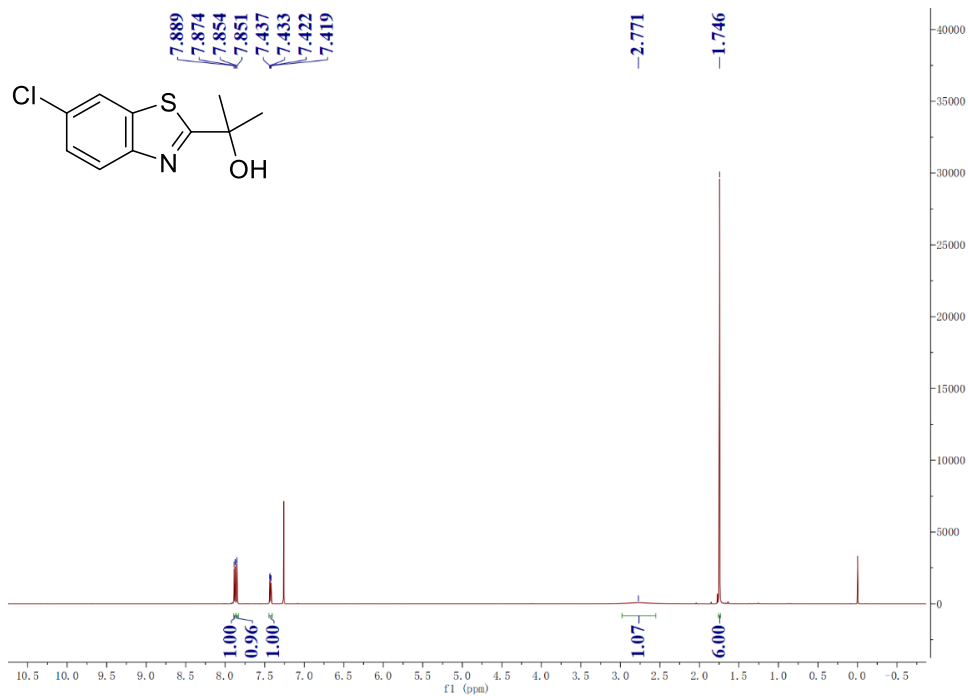

### $^{13}\text{C}$ NMR (151 MHz, $\text{CDCl}_3$ ) of 3a

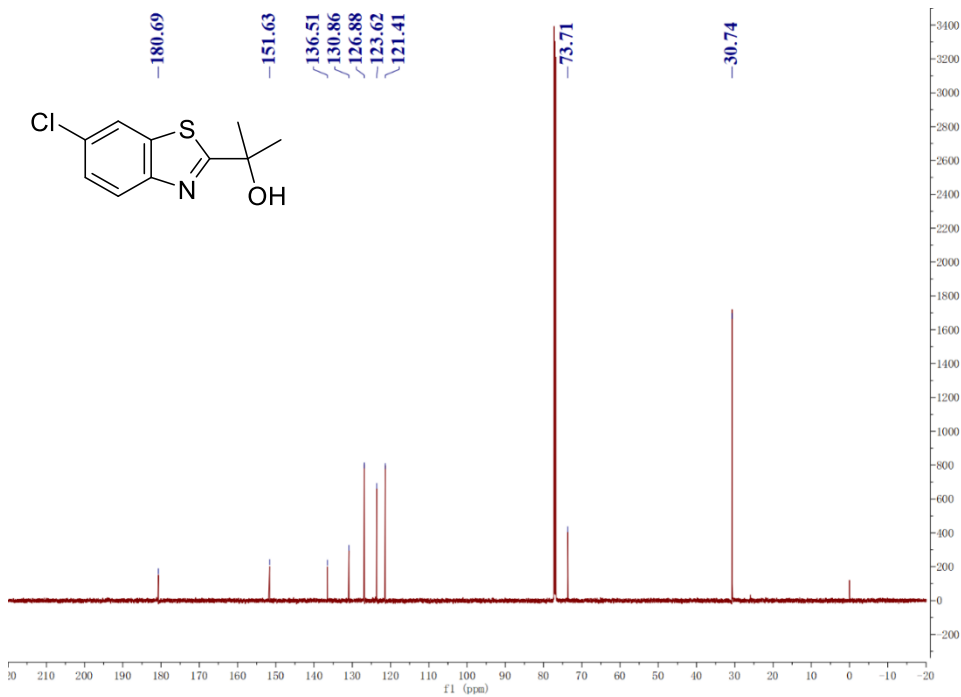



**<sup>1</sup>H NMR (400 MHz, CDCl<sub>3</sub>) of 3b**

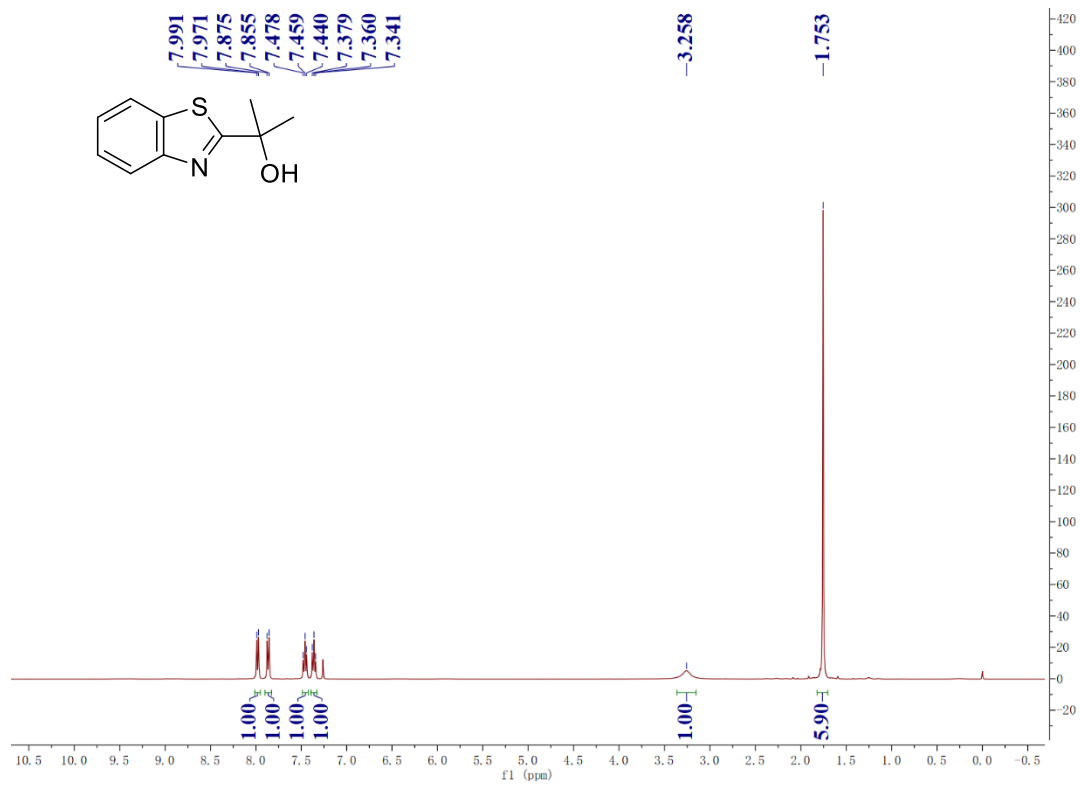

**<sup>13</sup>C NMR (101 MHz, CDCl<sub>3</sub>) of 3b**

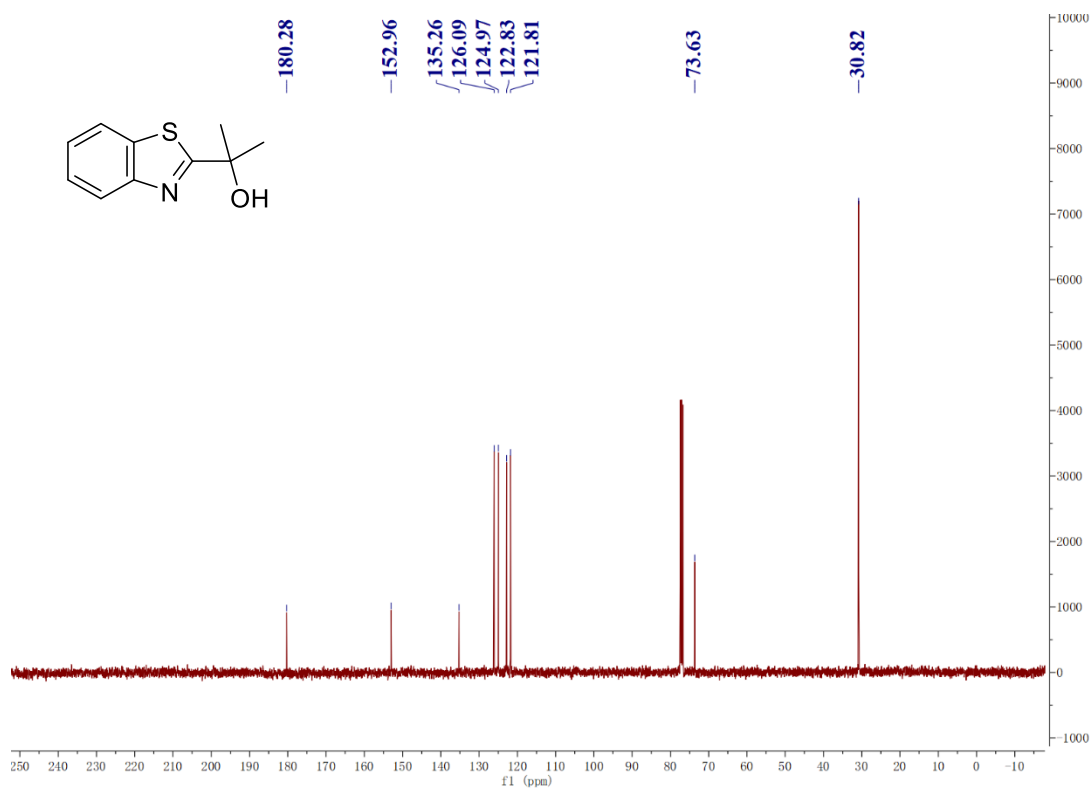

**<sup>1</sup>H NMR (600 MHz, CDCl<sub>3</sub>) of 3c**

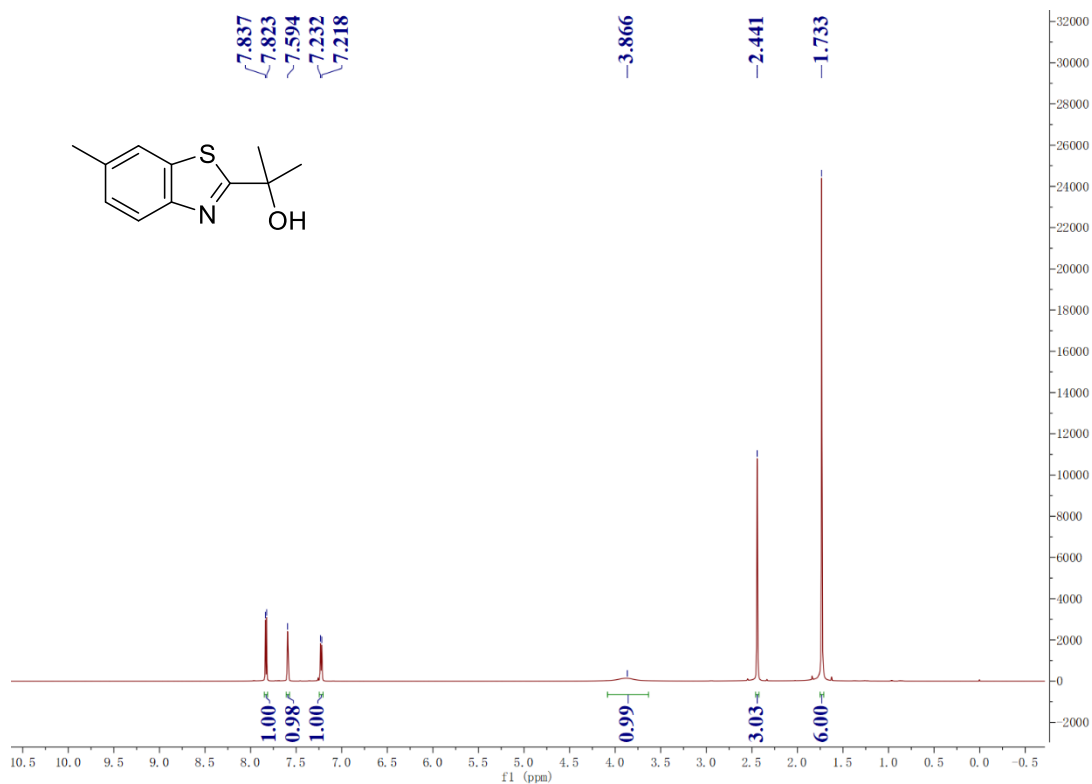

**<sup>13</sup>C NMR (151 MHz, CDCl<sub>3</sub>) of 3c**

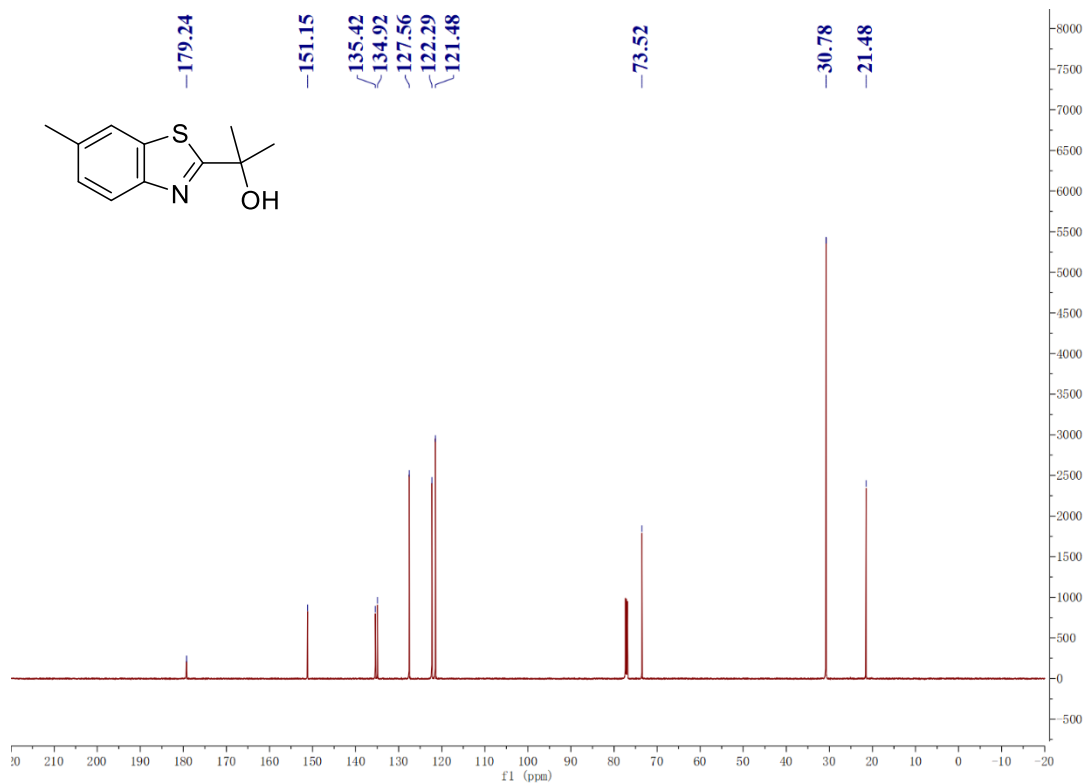

**<sup>1</sup>H NMR (400 MHz, CDCl<sub>3</sub>) of 3d**

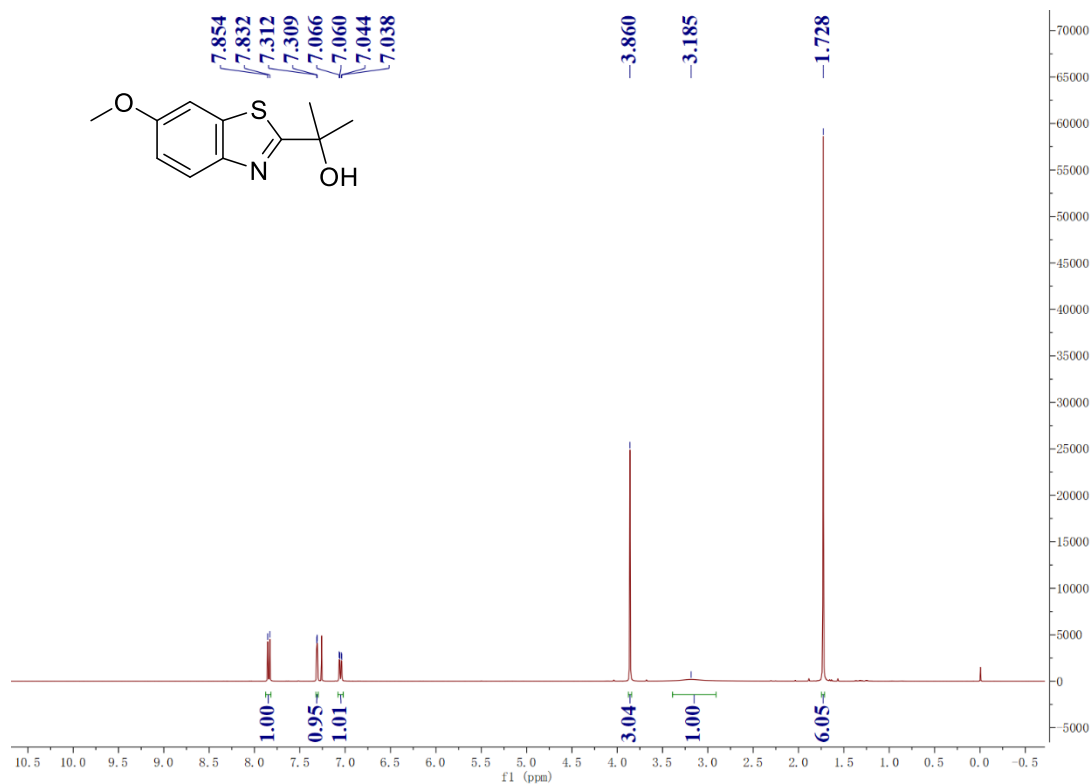

**<sup>13</sup>C NMR (151 MHz, CDCl<sub>3</sub>) of 3d**

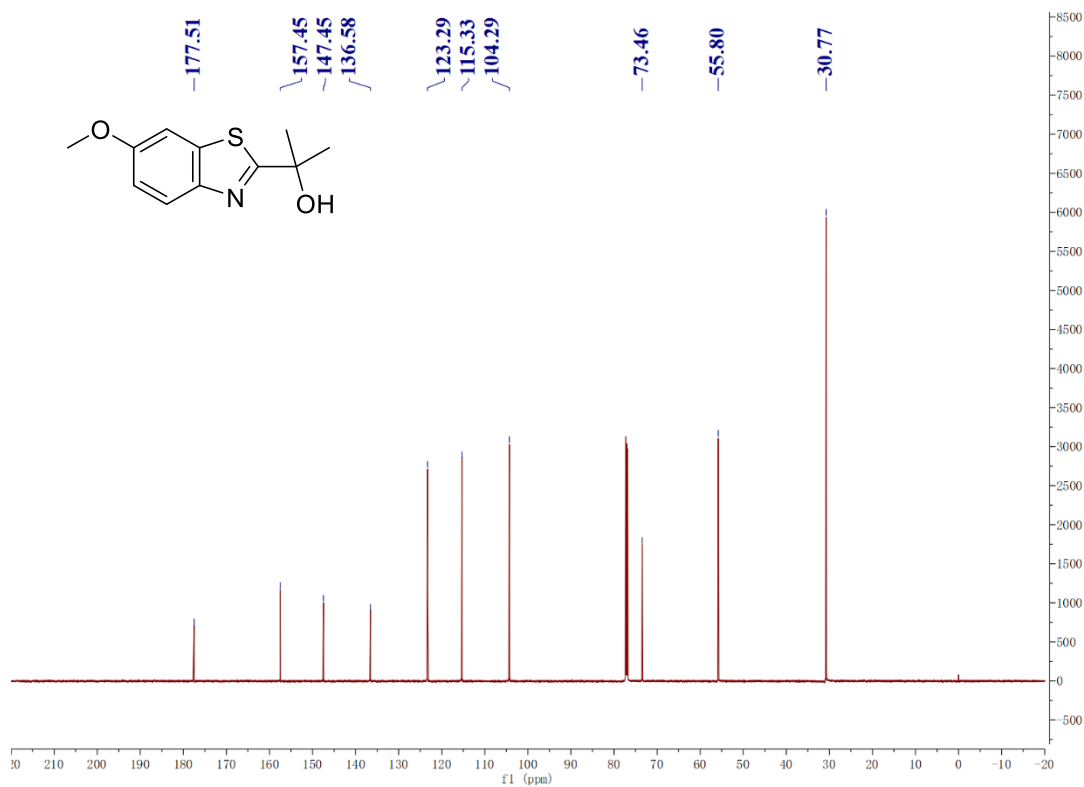

**<sup>1</sup>H NMR (600 MHz, CDCl<sub>3</sub>) of 3e**

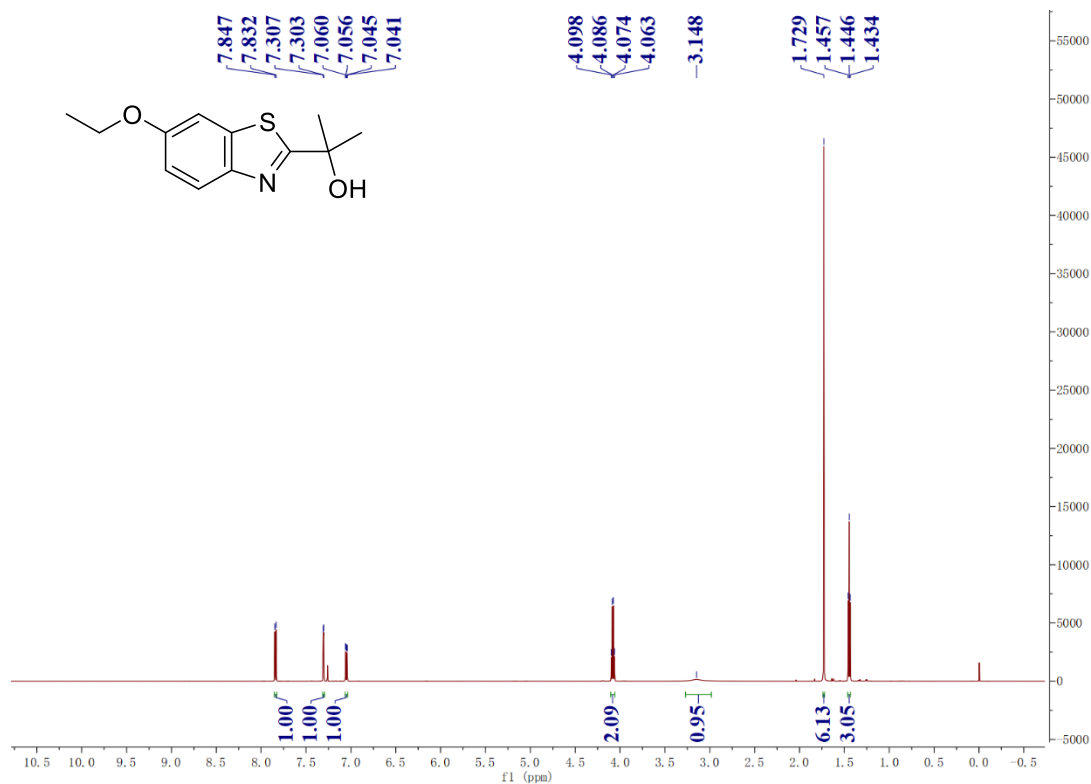

**<sup>13</sup>C NMR (151 MHz, CDCl<sub>3</sub>) of 3e**

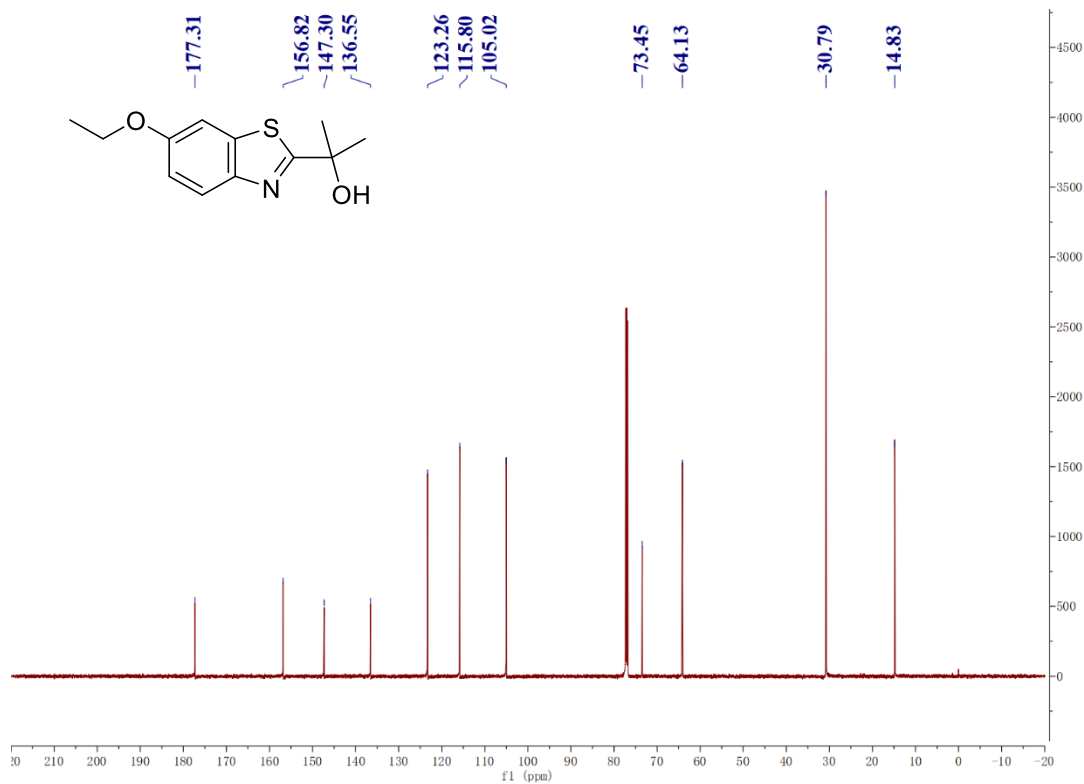

**<sup>1</sup>H NMR (600 MHz, CDCl<sub>3</sub>) of 3f**

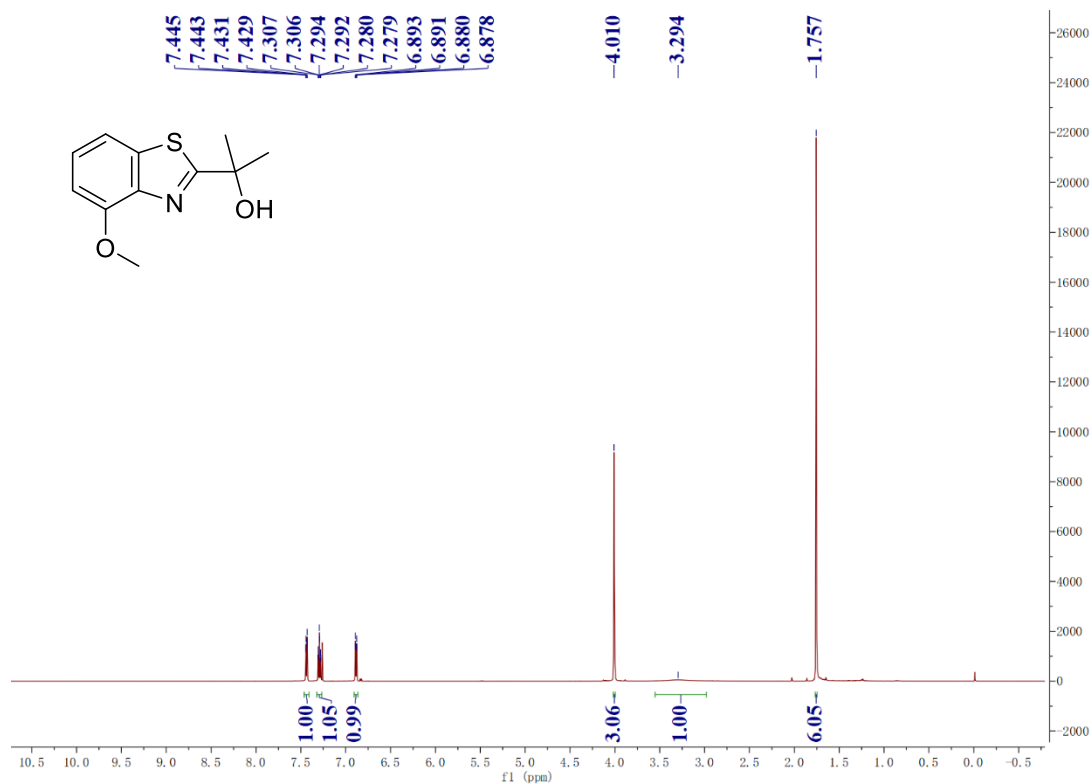

**<sup>13</sup>C NMR (151 MHz, CDCl<sub>3</sub>) of 3f**

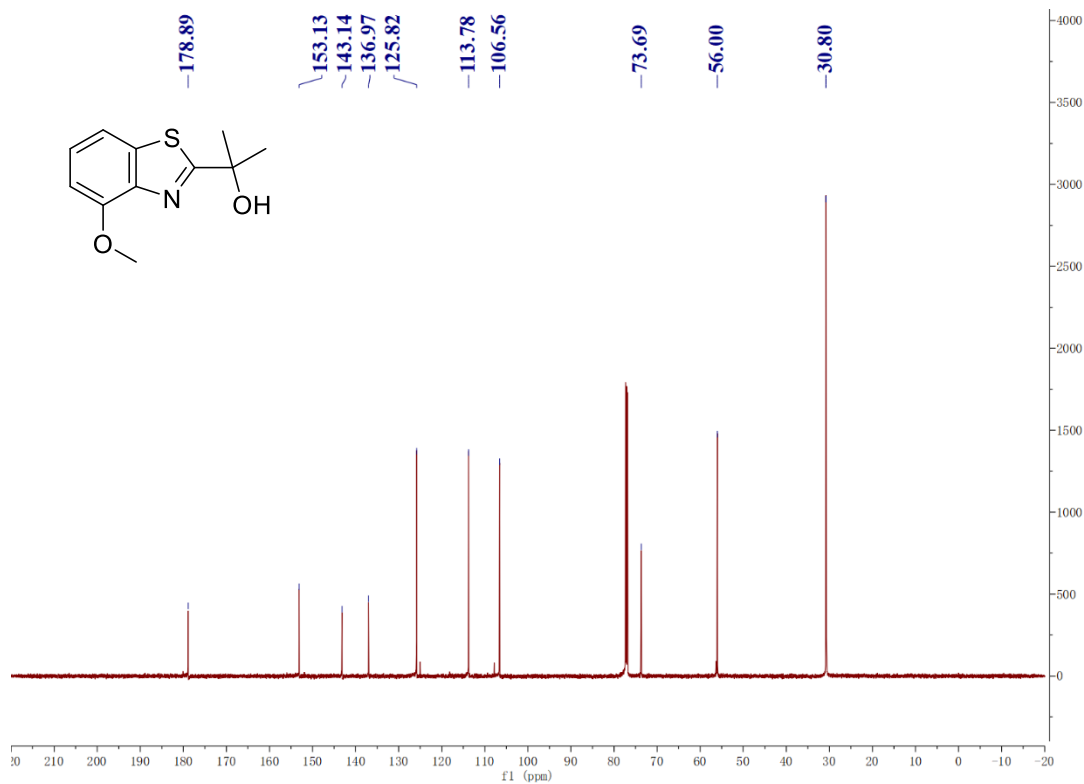

**<sup>1</sup>H NMR (600 MHz, CDCl<sub>3</sub>) of 3g**

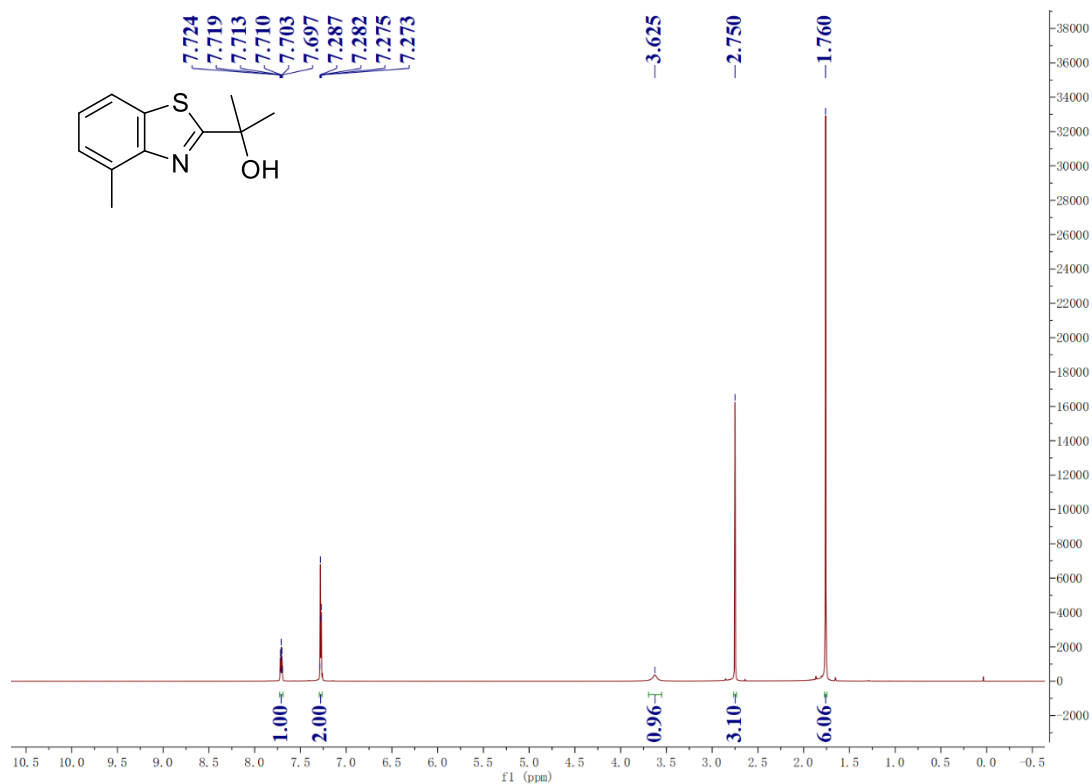

**<sup>13</sup>C NMR (151 MHz, CDCl<sub>3</sub>) of 3g**

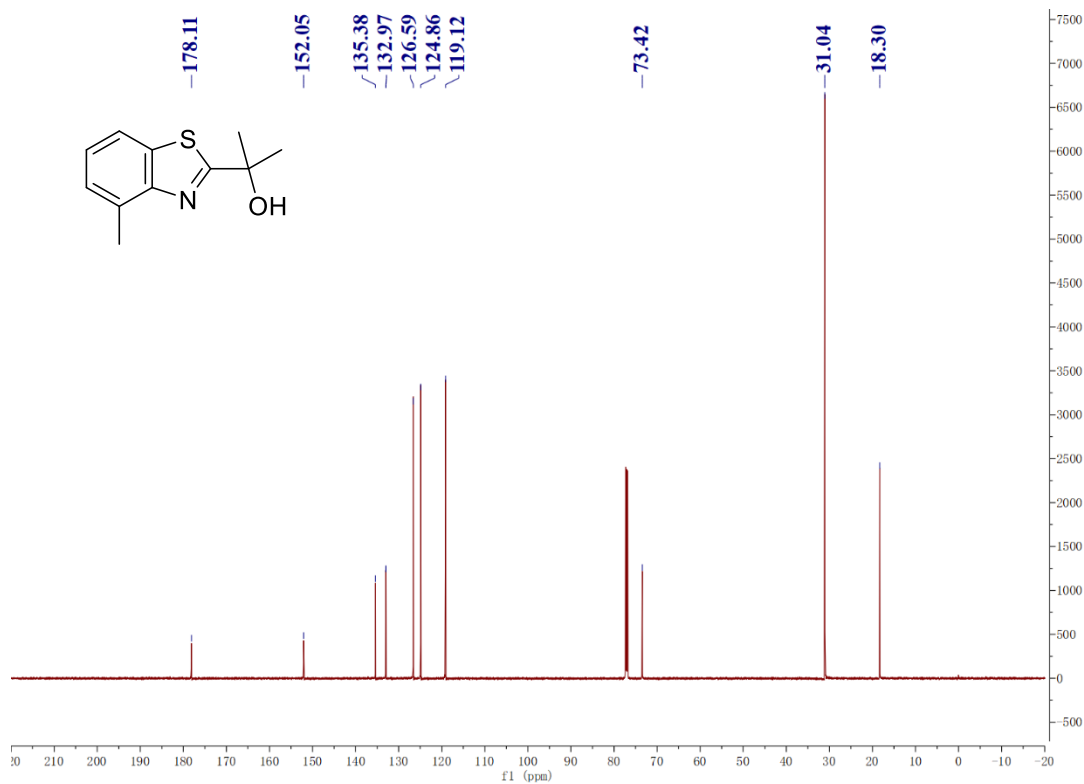

**<sup>1</sup>H NMR (600 MHz, CDCl<sub>3</sub>) of 3h**

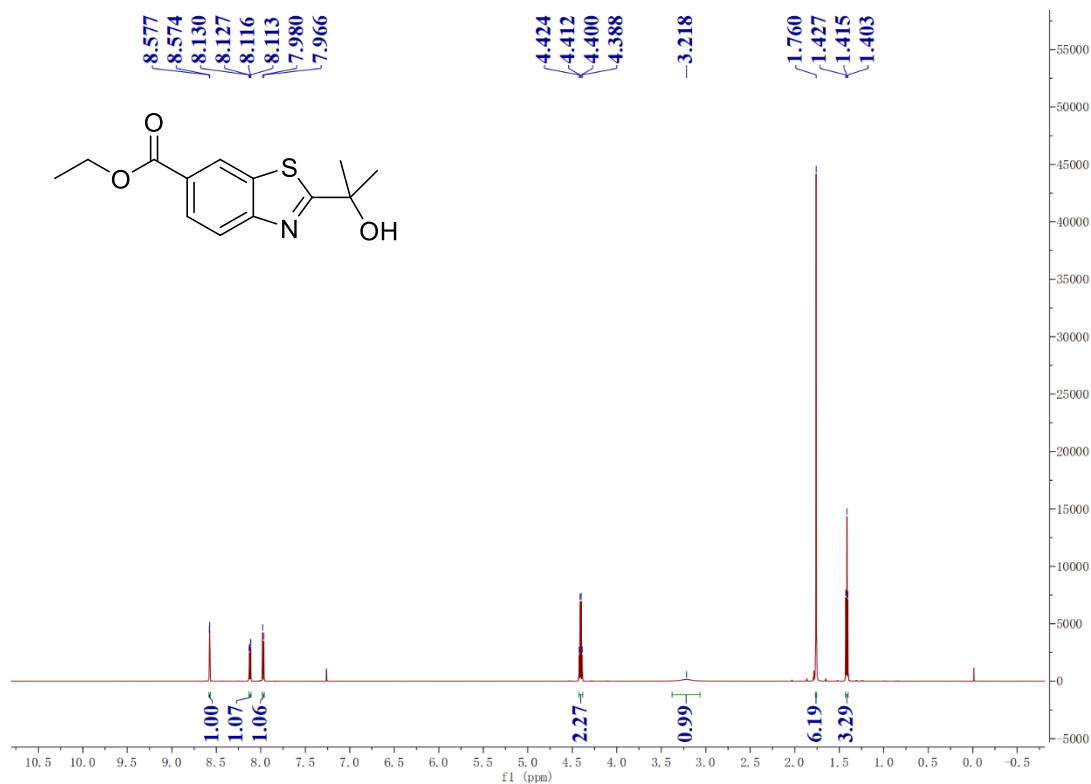

**<sup>13</sup>C NMR (151 MHz, CDCl<sub>3</sub>) of 3h**

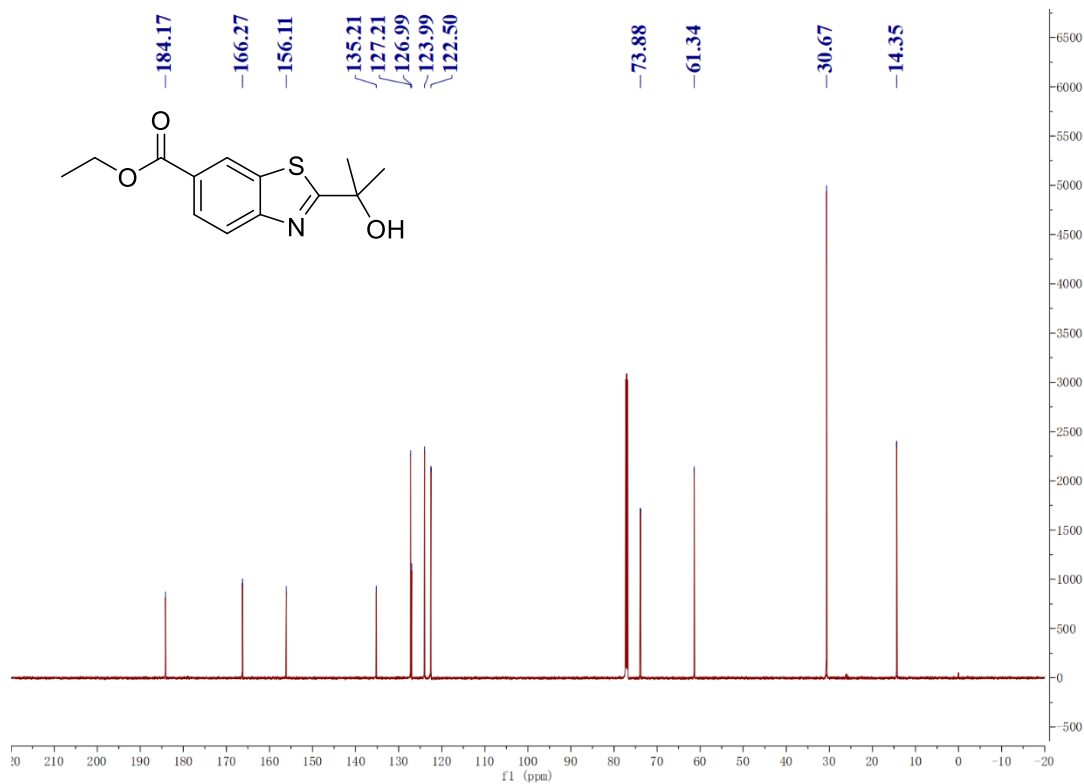

**<sup>1</sup>H NMR (600 MHz, CDCl<sub>3</sub>) of 3i**

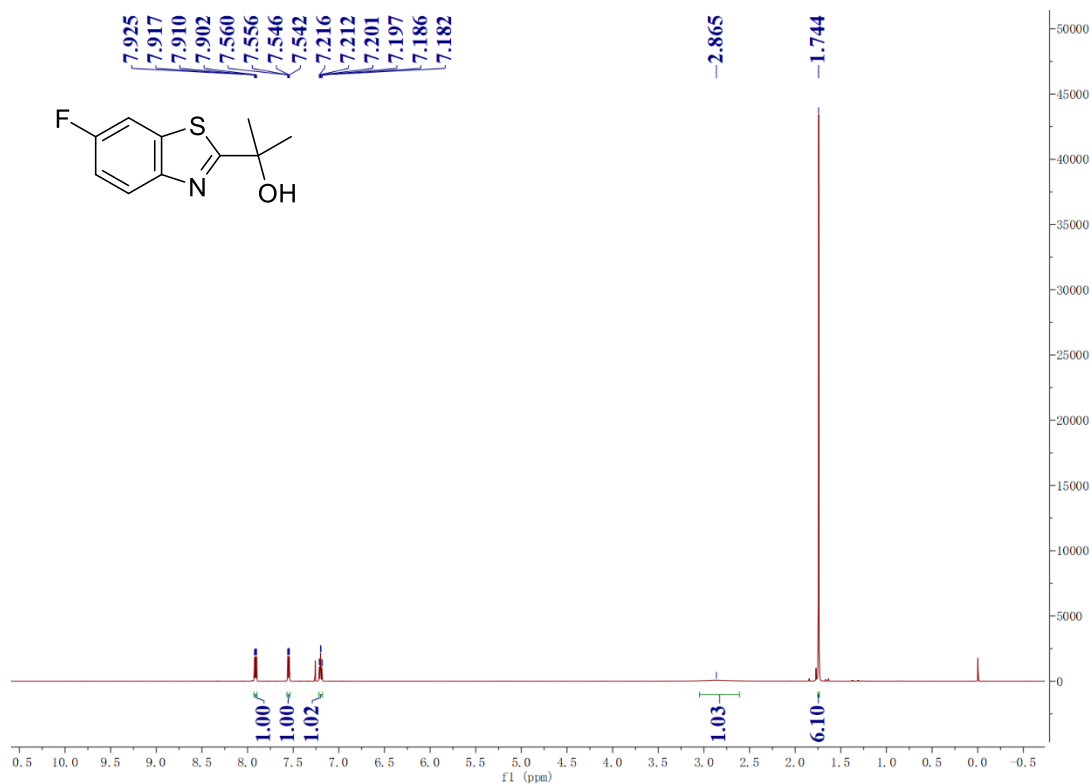

**<sup>13</sup>C NMR (151 MHz, CDCl<sub>3</sub>) of 3i**

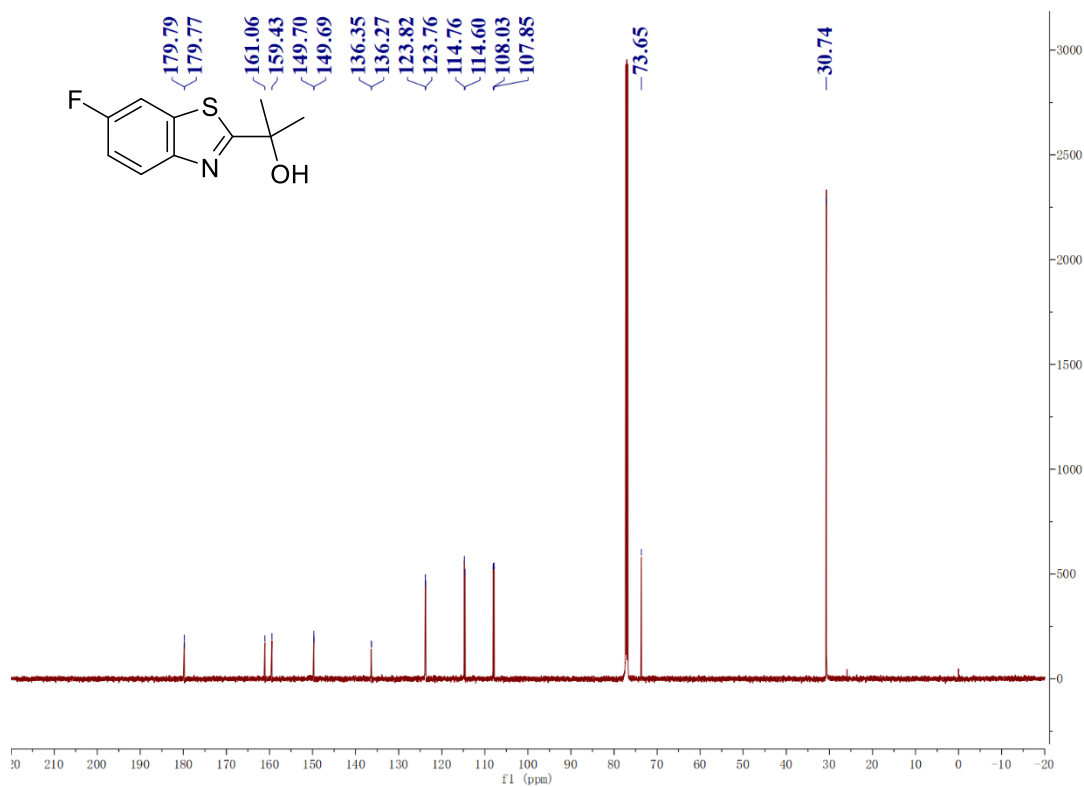



**<sup>1</sup>H NMR (600 MHz, CDCl<sub>3</sub>) of 3j**

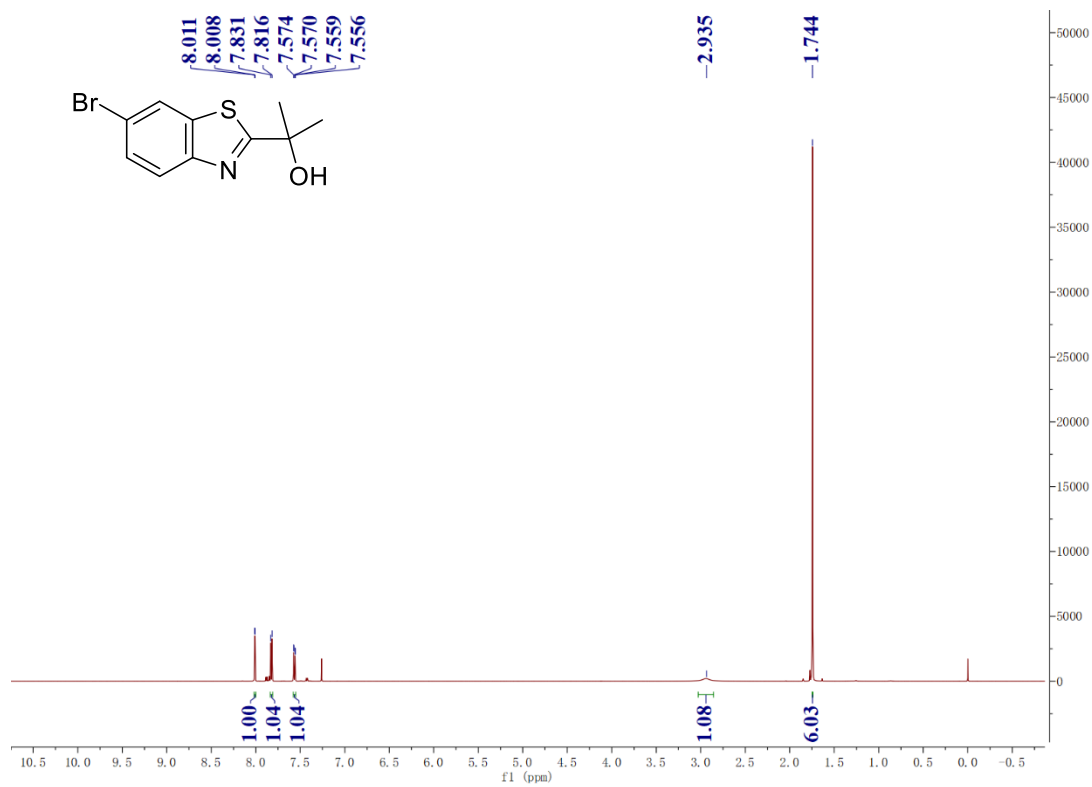

**<sup>13</sup>C NMR (151 MHz, CDCl<sub>3</sub>) of 3j**

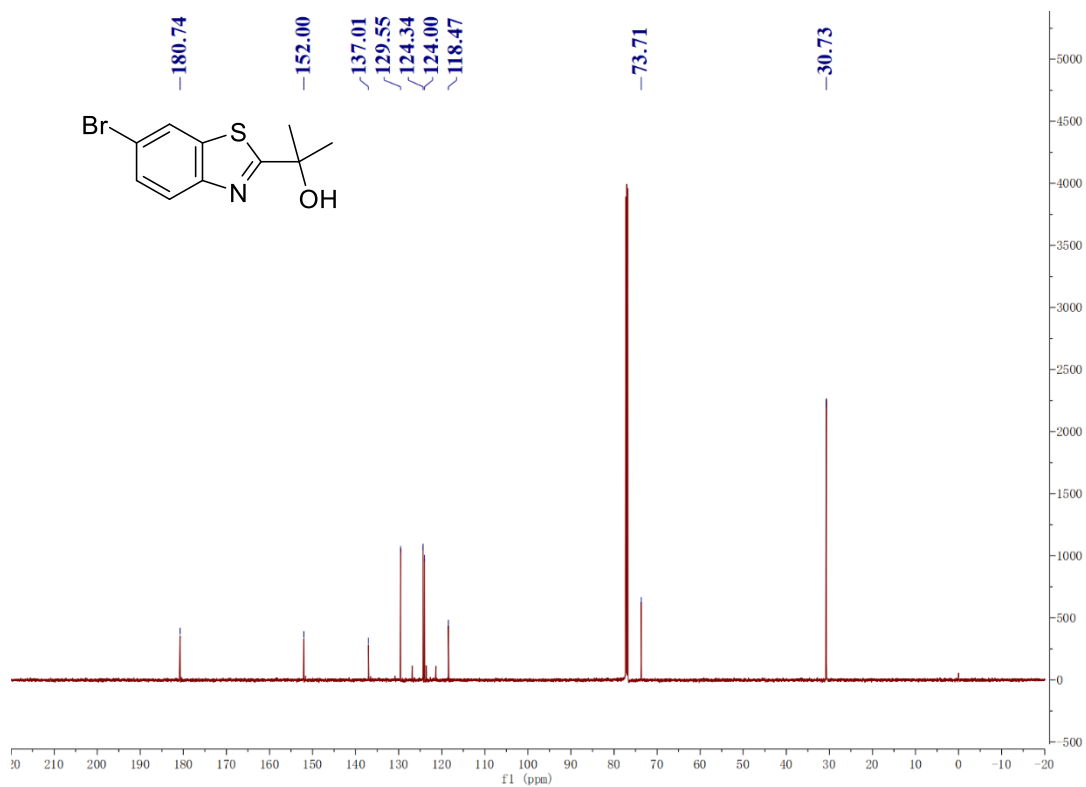

**<sup>1</sup>H NMR (600 MHz, CDCl<sub>3</sub>) of 3k**

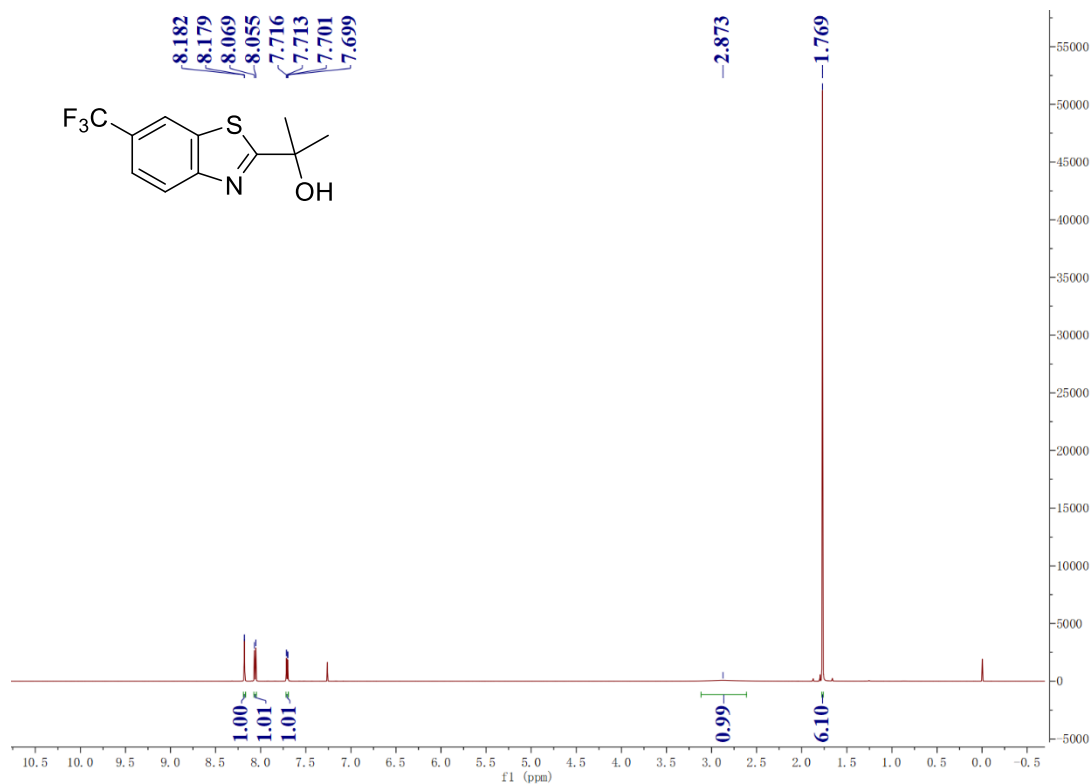

**<sup>13</sup>C NMR (151 MHz, CDCl<sub>3</sub>) of 3k**

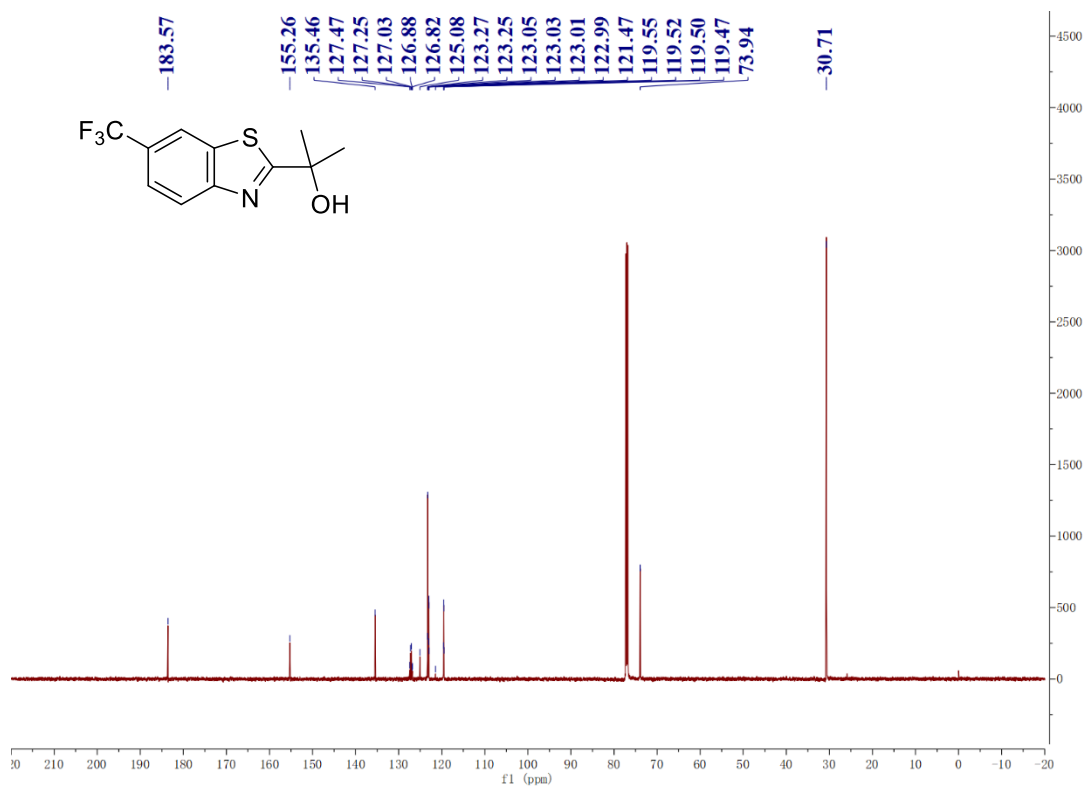

**<sup>1</sup>H NMR (600 MHz, CDCl<sub>3</sub>) of 31**

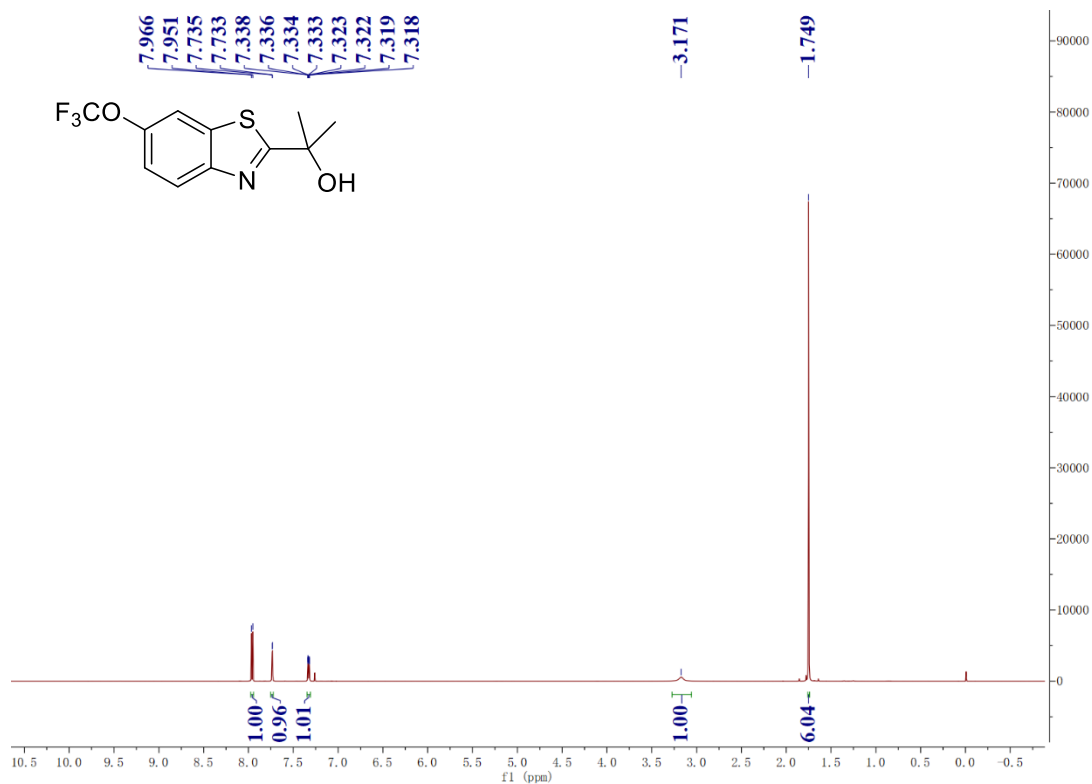

**<sup>13</sup>C NMR (151 MHz, CDCl<sub>3</sub>) of 31**

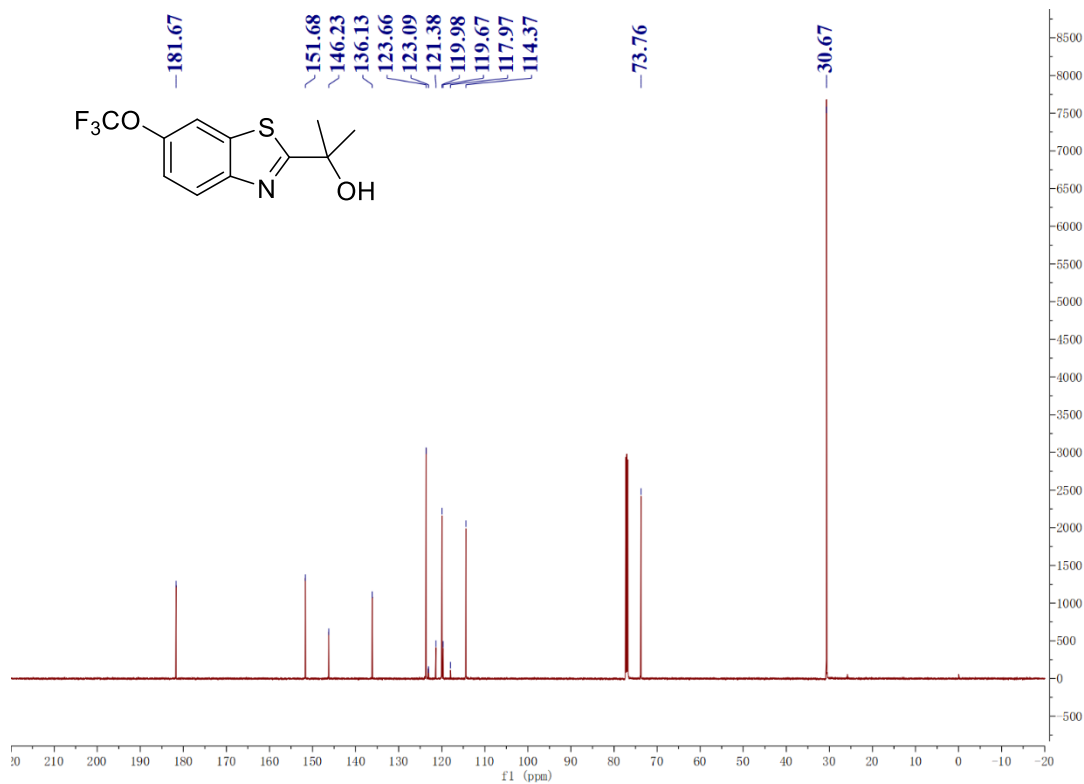

**<sup>1</sup>H NMR (600 MHz, CDCl<sub>3</sub>) of 3m**

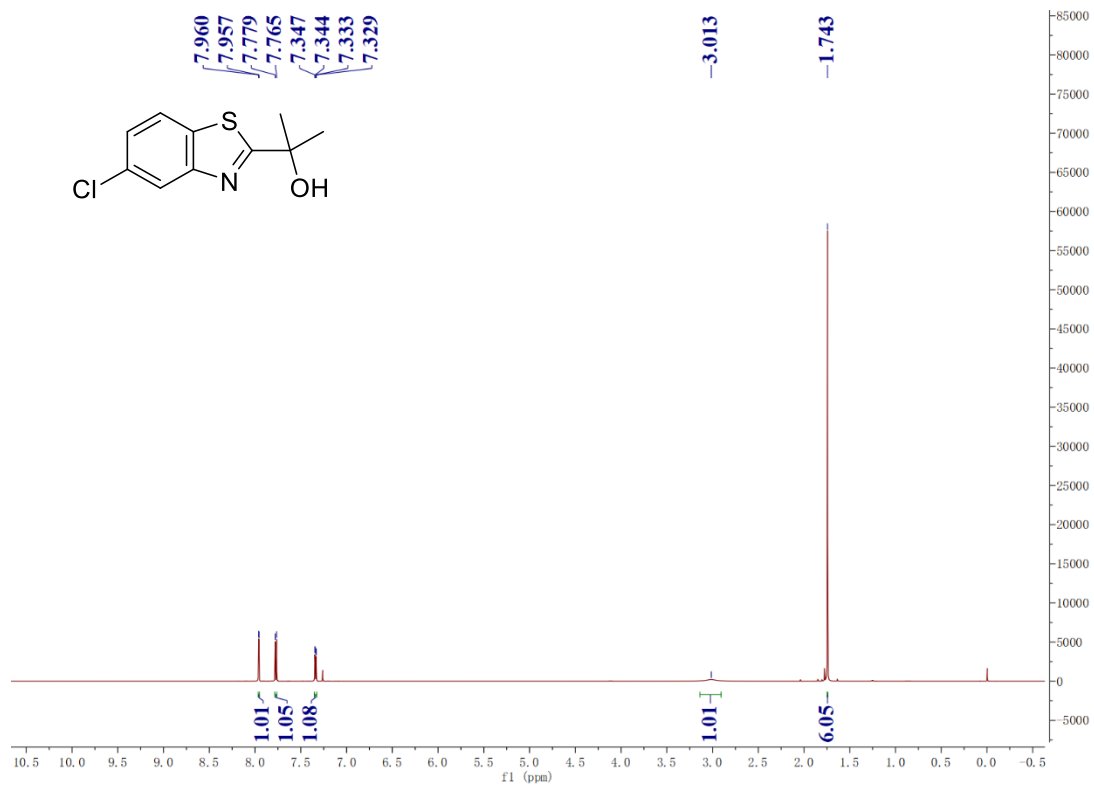

**<sup>13</sup>C NMR (151 MHz, CDCl<sub>3</sub>) of 3m**

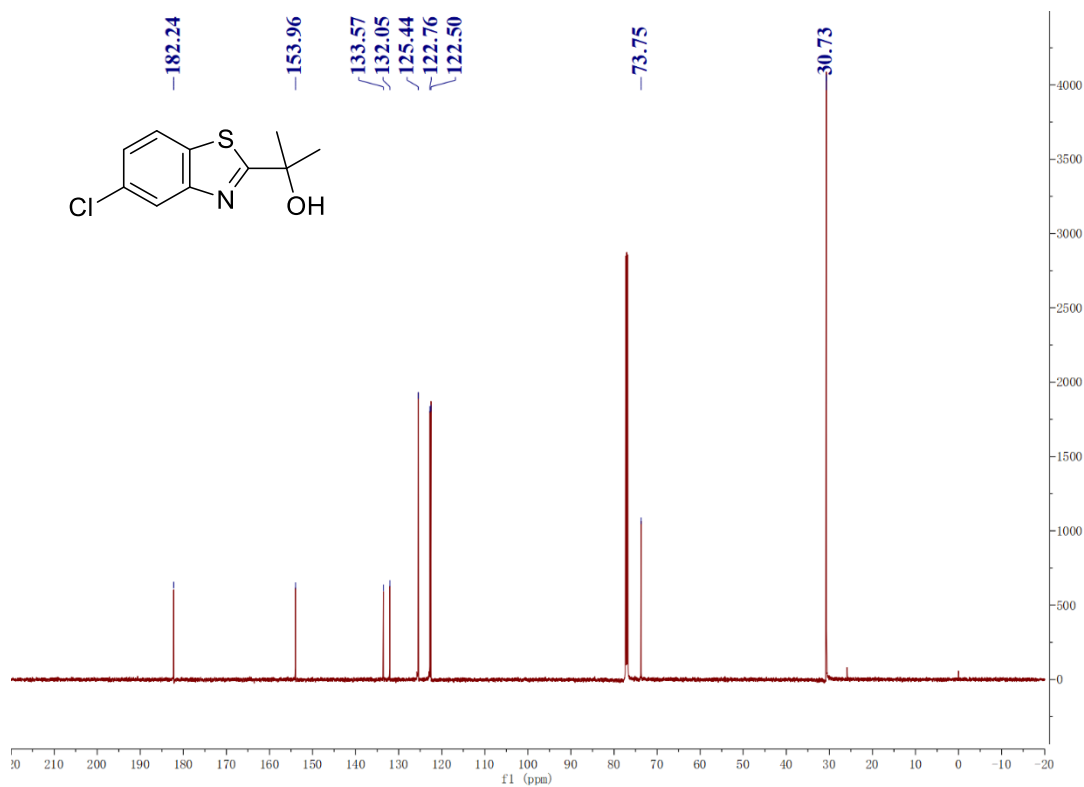

**<sup>1</sup>H NMR (600 MHz, CDCl<sub>3</sub>) of 3n**

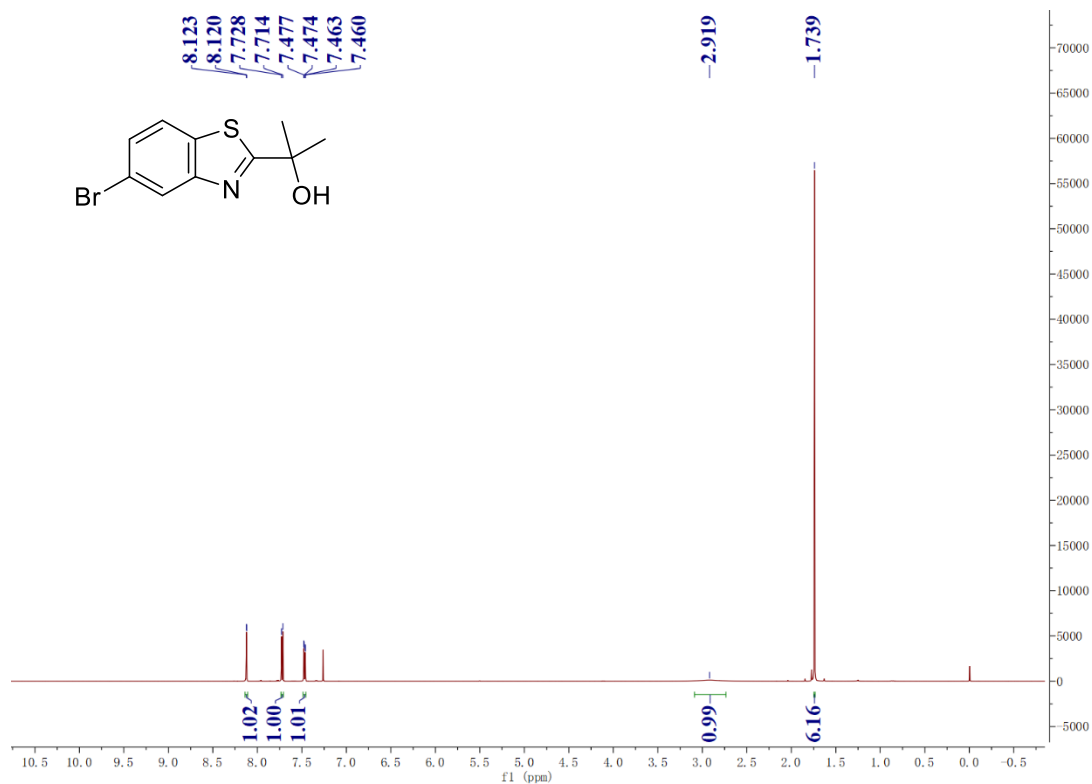

**<sup>13</sup>C NMR (151 MHz, CDCl<sub>3</sub>) of 3n**

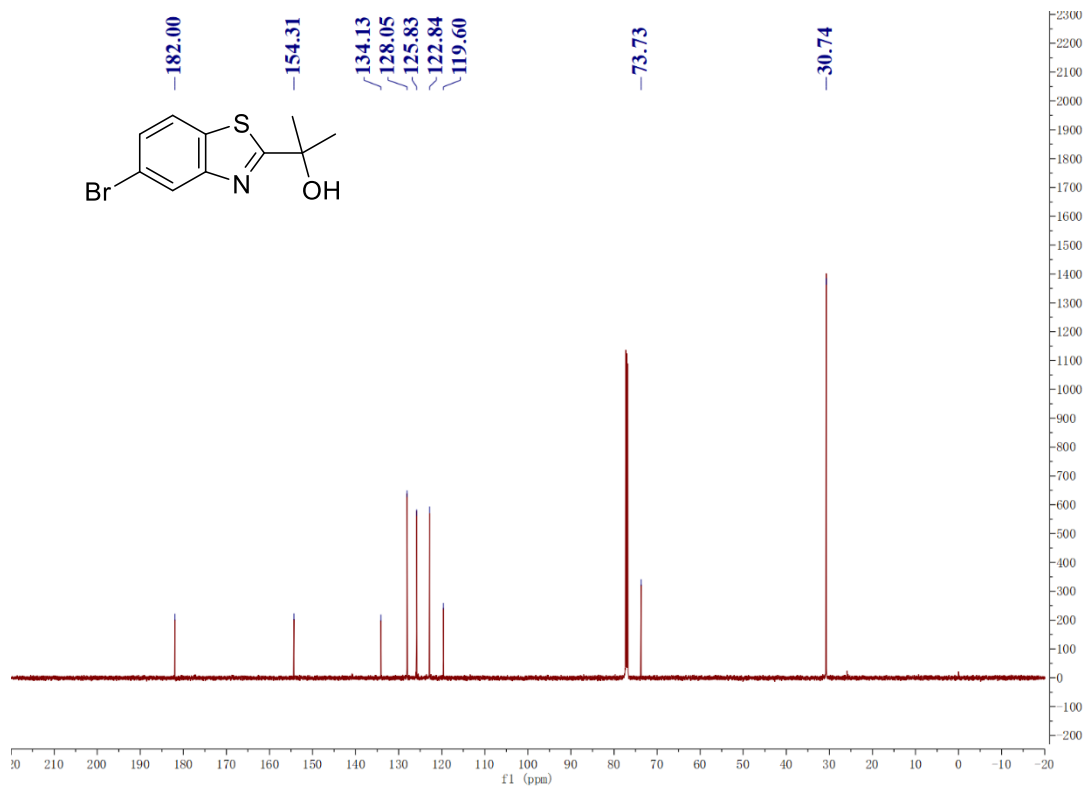

**<sup>1</sup>H NMR (600 MHz, CDCl<sub>3</sub>) of 3o**

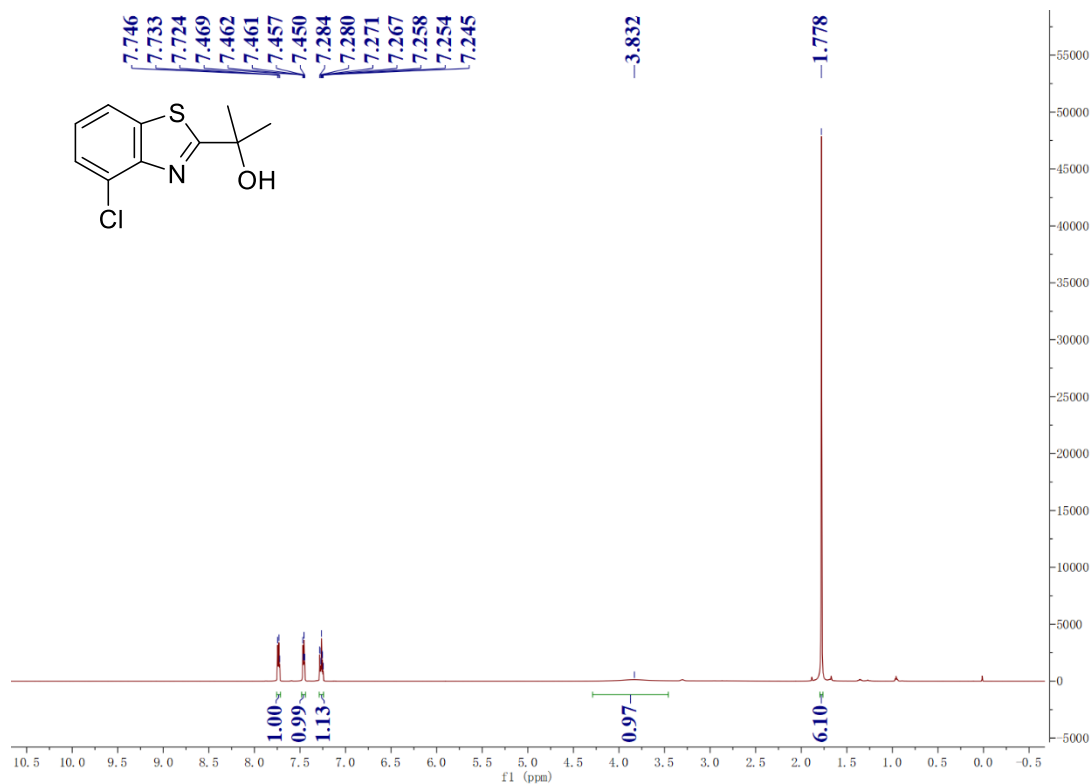

**<sup>13</sup>C NMR (151 MHz, CDCl<sub>3</sub>) of 3o**

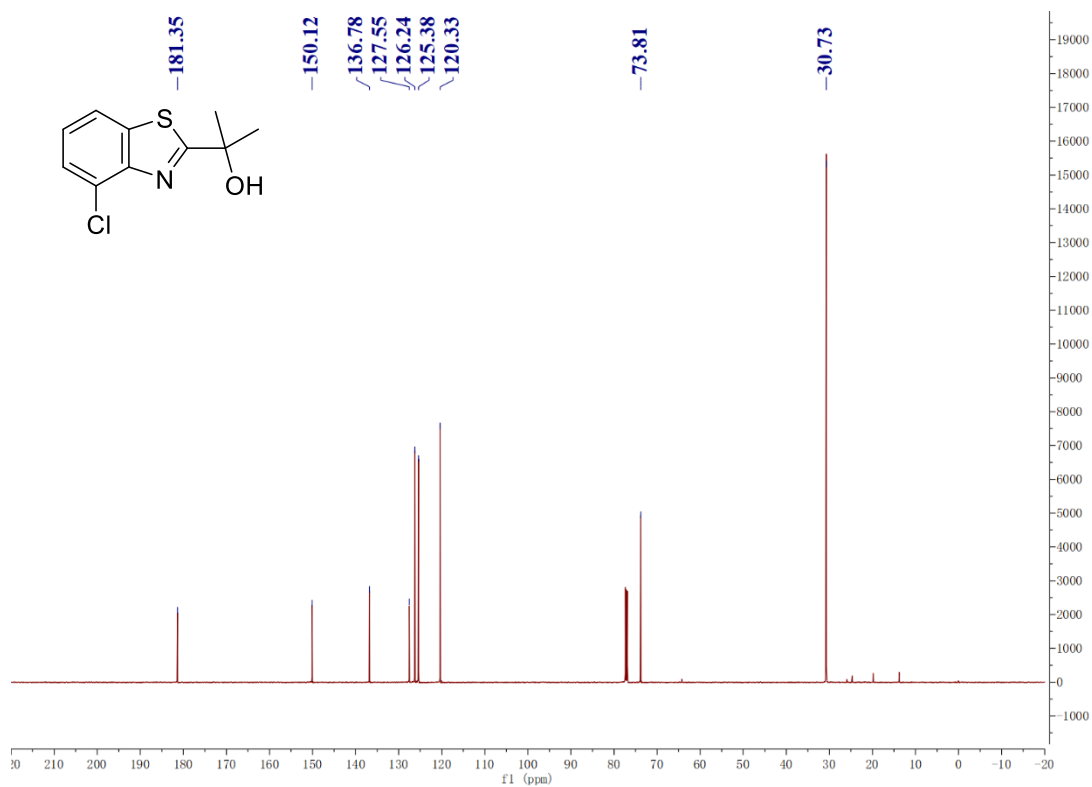

**<sup>1</sup>H NMR (400 MHz, CDCl<sub>3</sub>) of 3p**

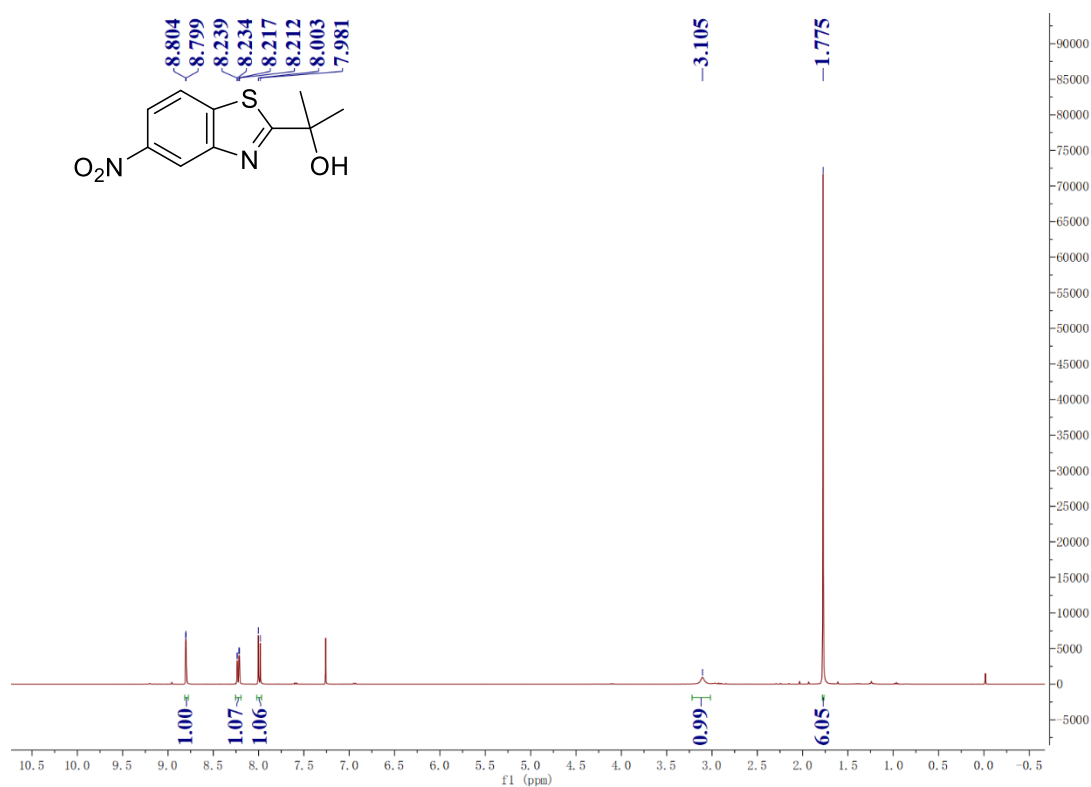

**<sup>13</sup>C NMR (101 MHz, CDCl<sub>3</sub>) of 3p**

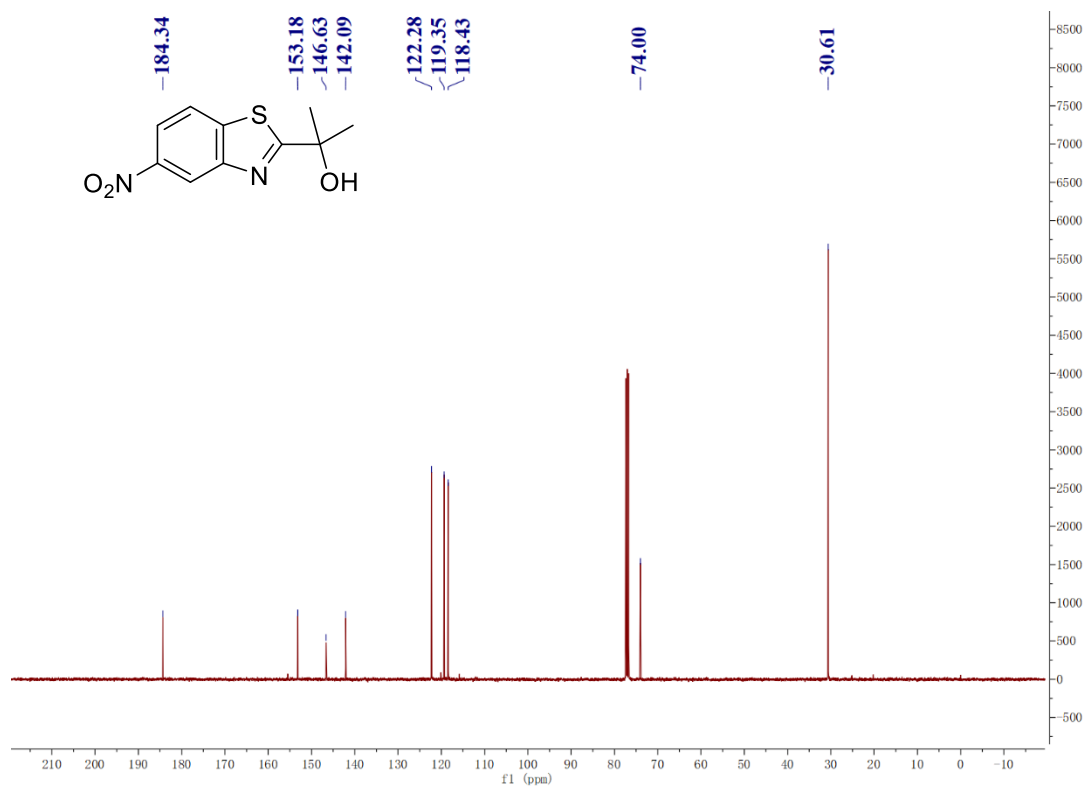

**<sup>1</sup>H NMR (400 MHz, CDCl<sub>3</sub>) of 3q**

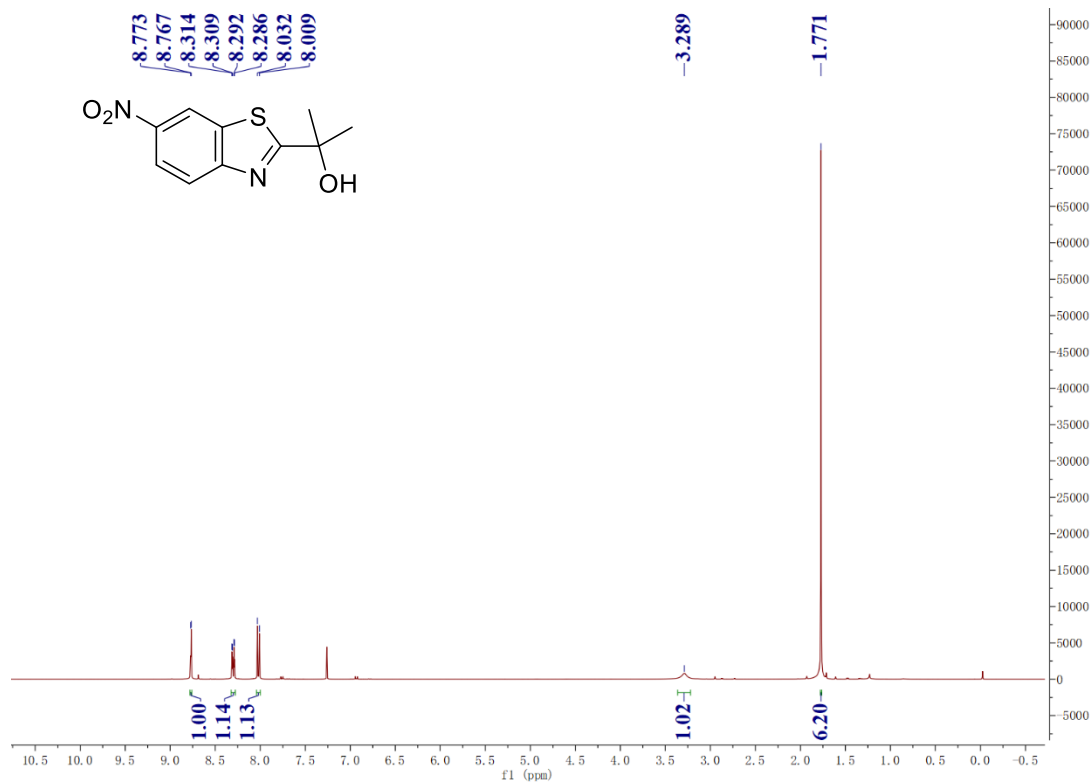

**<sup>13</sup>C NMR (101 MHz, CDCl<sub>3</sub>) of 3q**

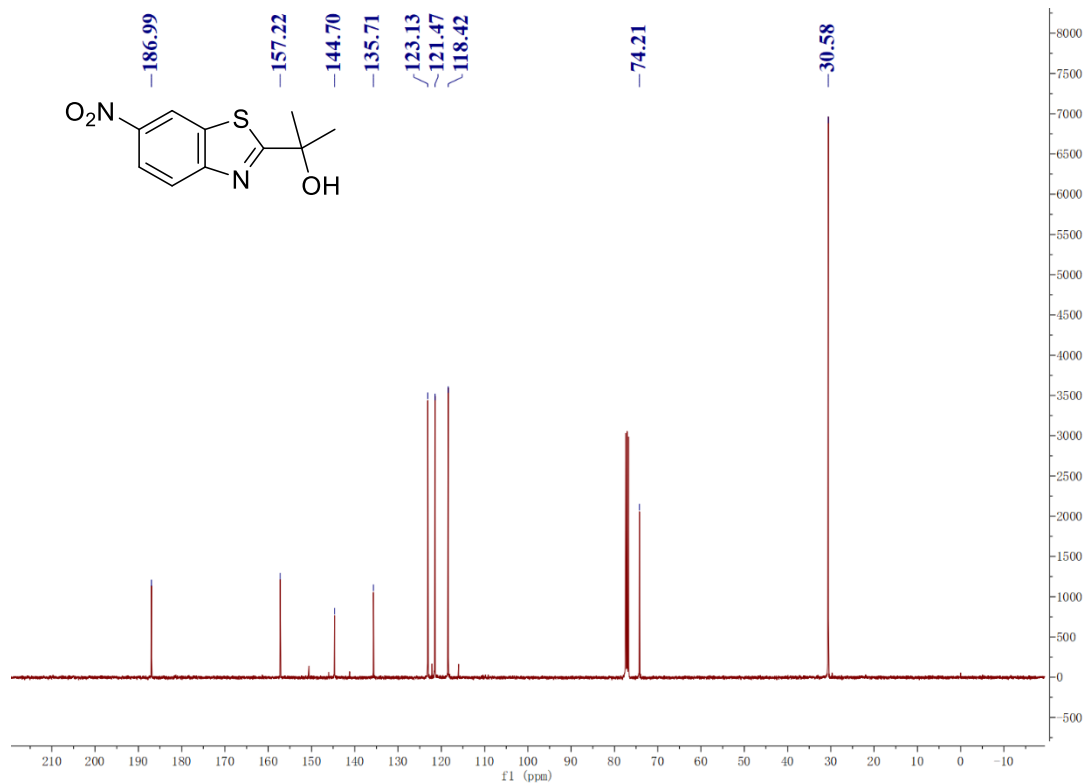



**<sup>1</sup>H NMR (600 MHz, CDCl<sub>3</sub>) of 3r**

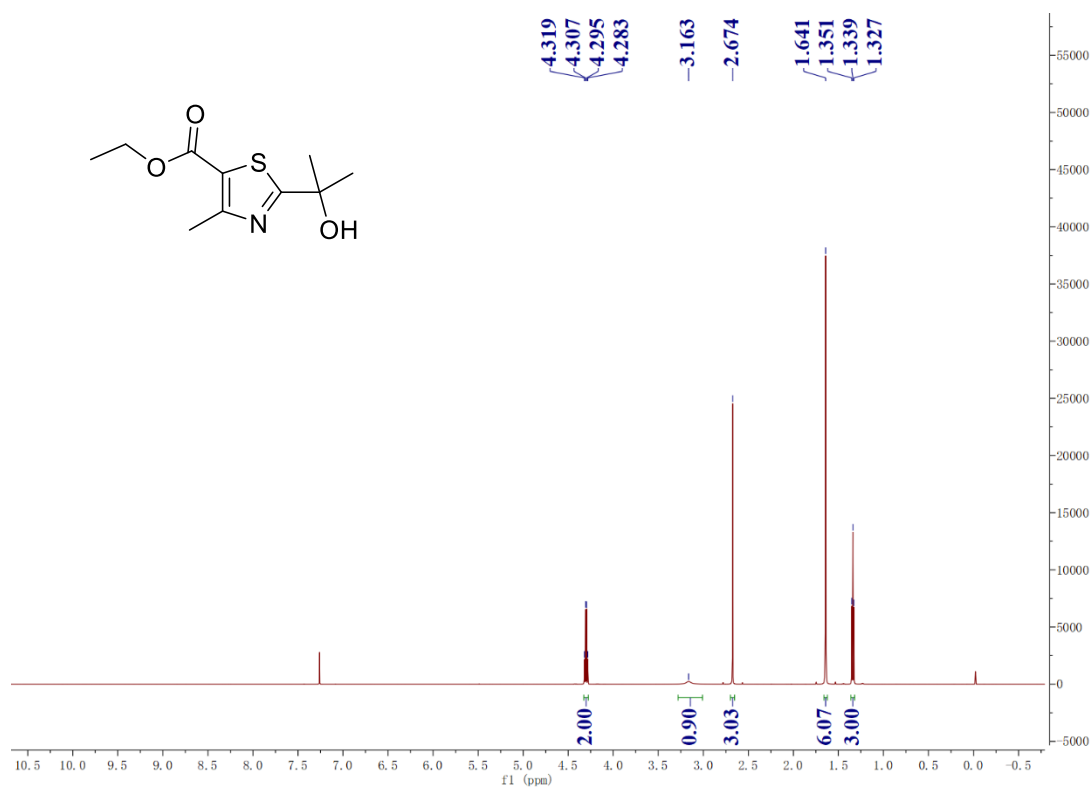

**<sup>13</sup>C NMR (151 MHz, CDCl<sub>3</sub>) of 3r**

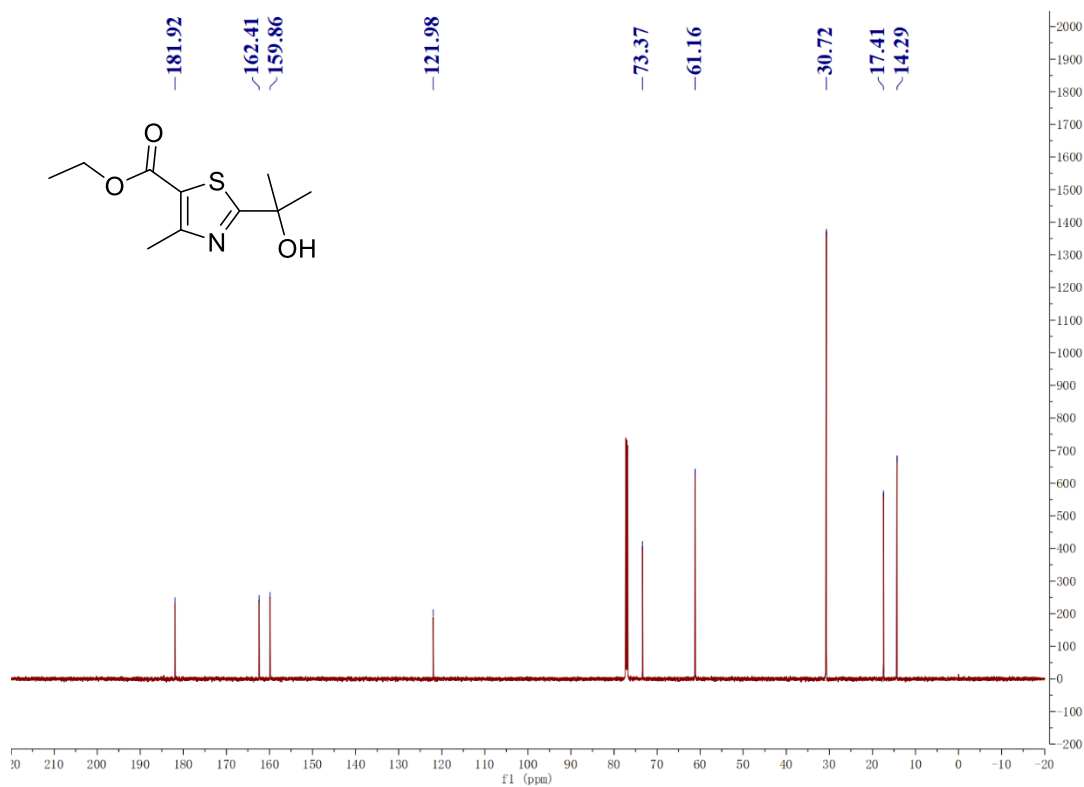

**<sup>1</sup>H NMR (400 MHz, CDCl<sub>3</sub>) of 3s**

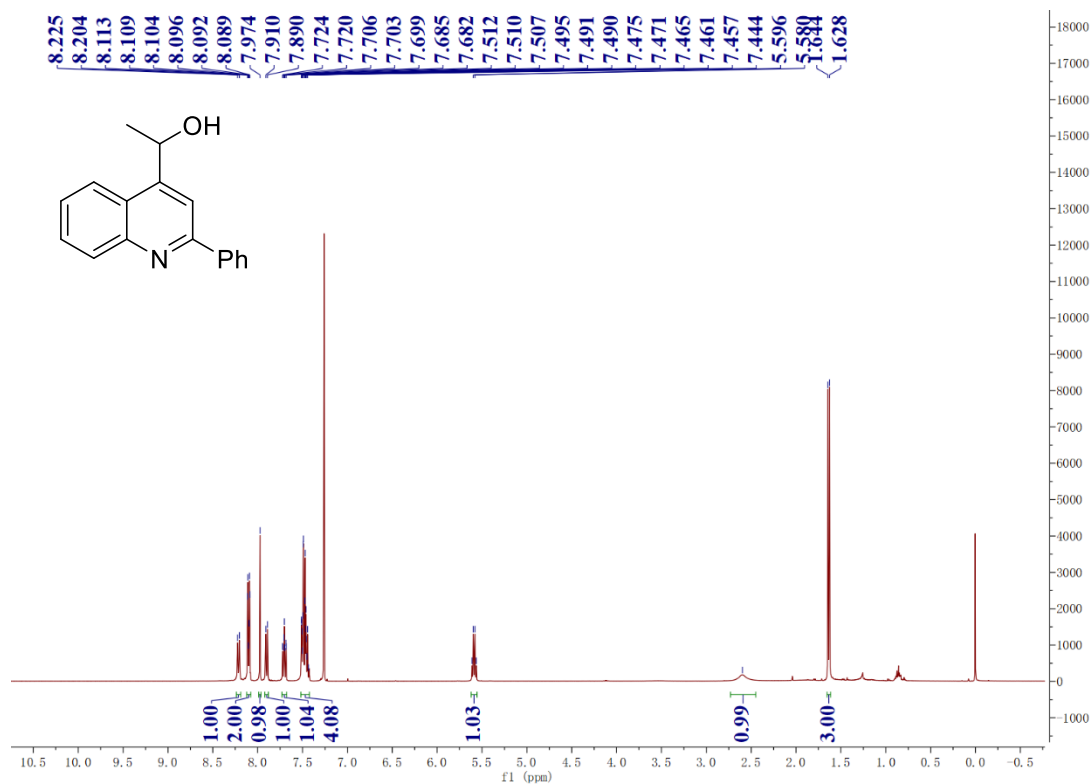

**<sup>13</sup>C NMR (101 MHz, CDCl<sub>3</sub>) of 3s**

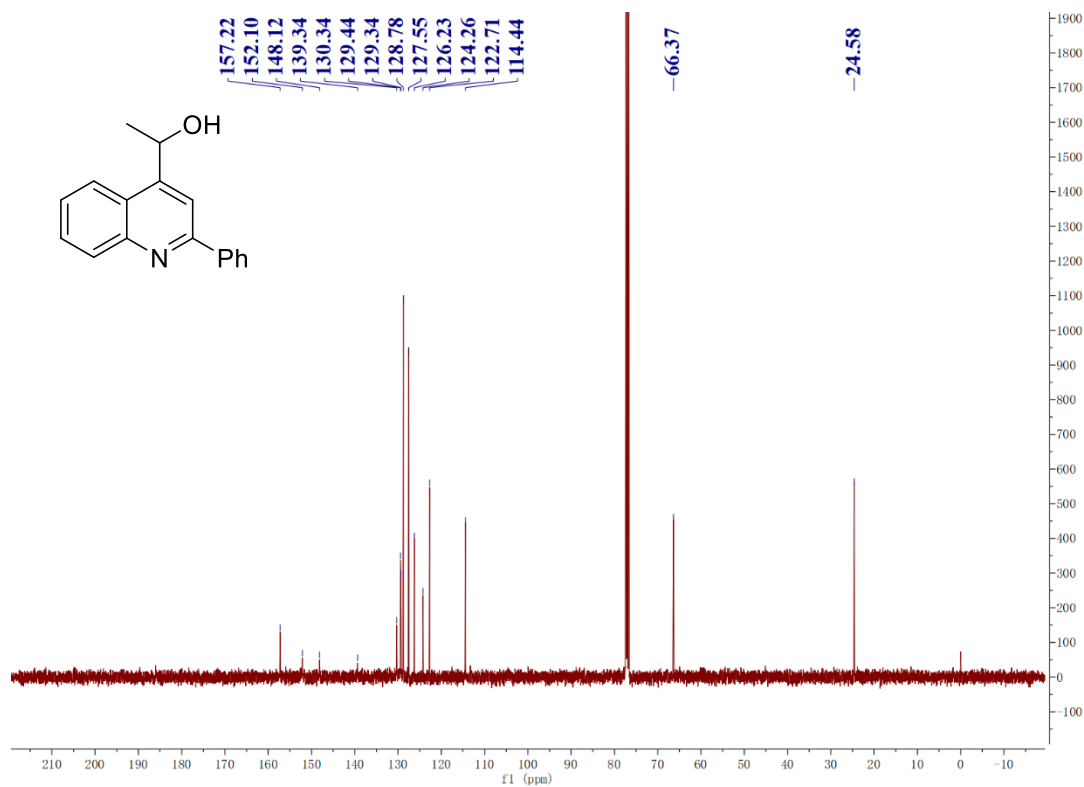

**<sup>1</sup>H NMR (400 MHz, DMSO-*d*<sub>6</sub>) of 3t**

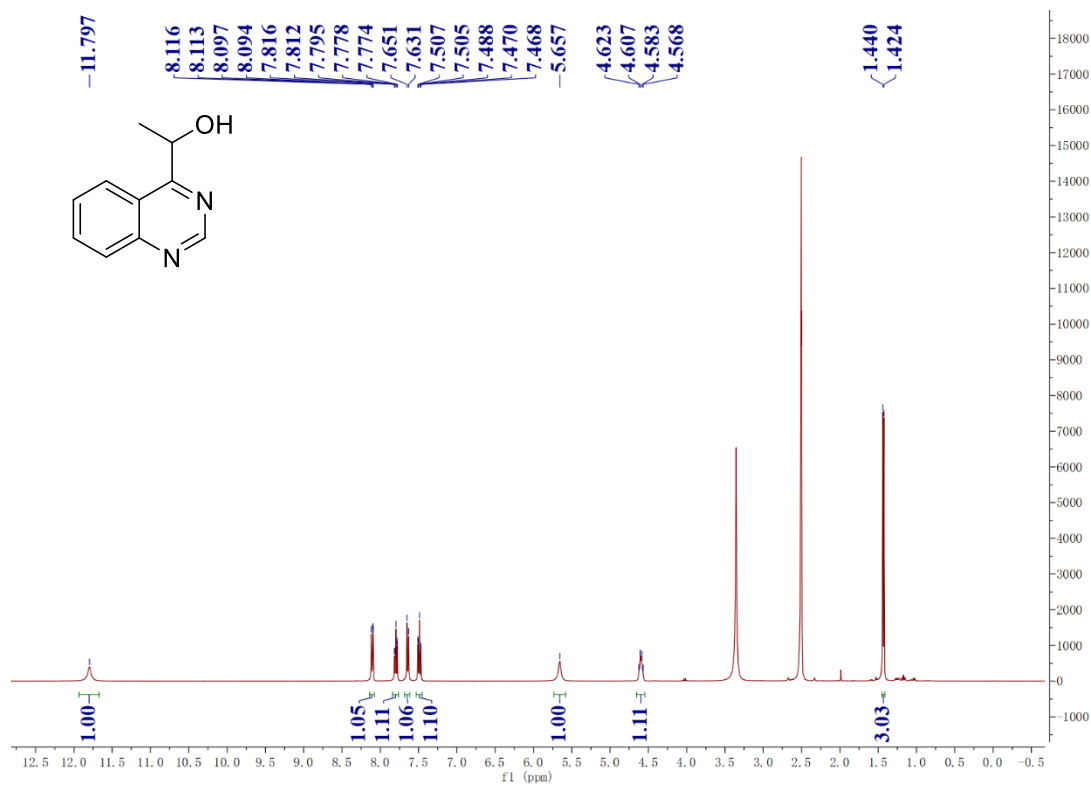

**<sup>13</sup>C NMR (101 MHz, DMSO-*d*<sub>6</sub>) of 3t**

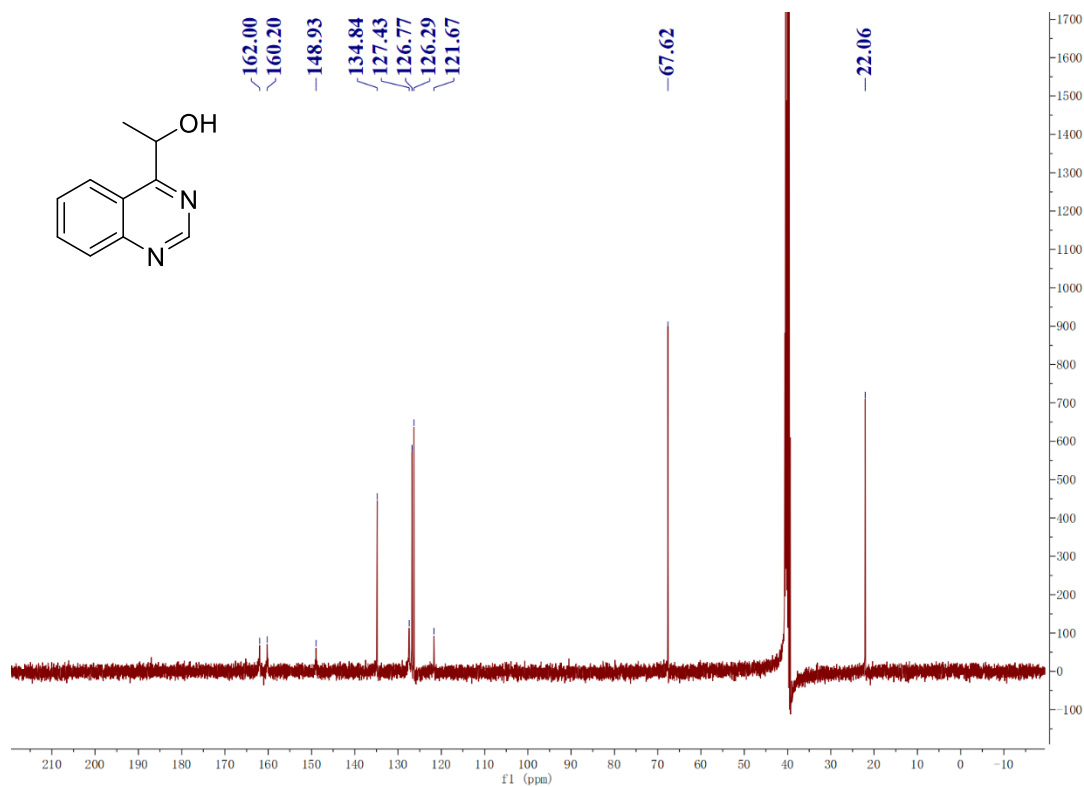

**<sup>1</sup>H NMR (600 MHz, CDCl<sub>3</sub>) of 4a**

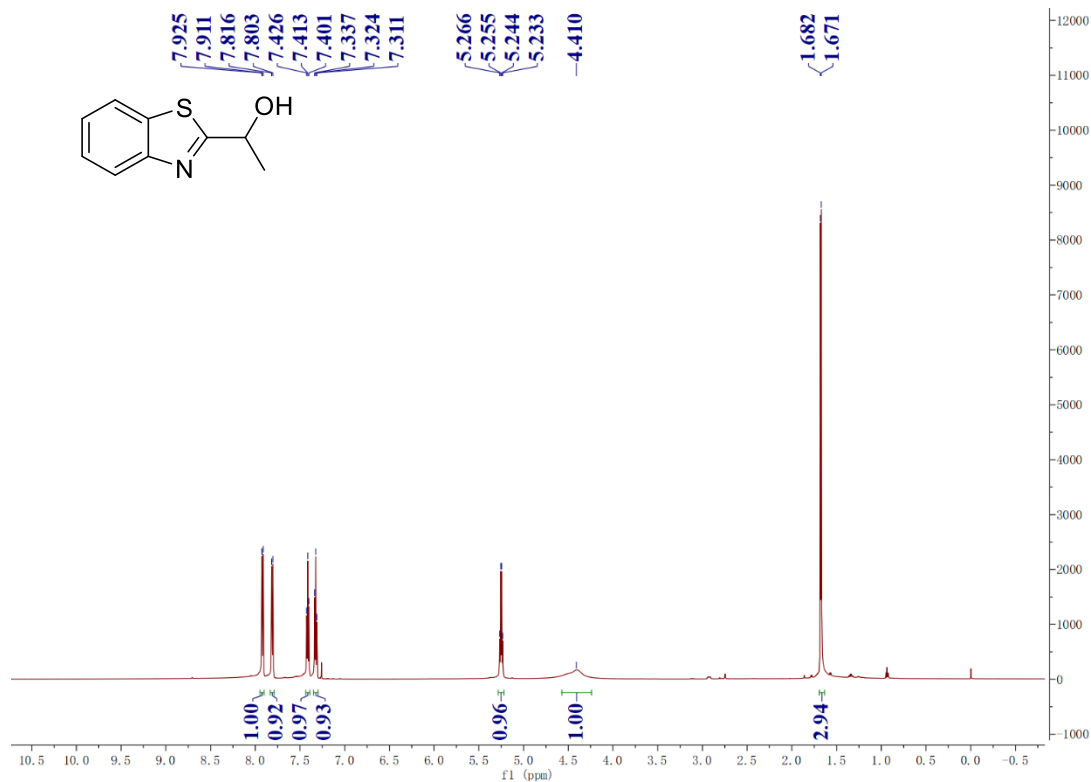

**<sup>13</sup>C NMR (151 MHz, CDCl<sub>3</sub>) of 4a**

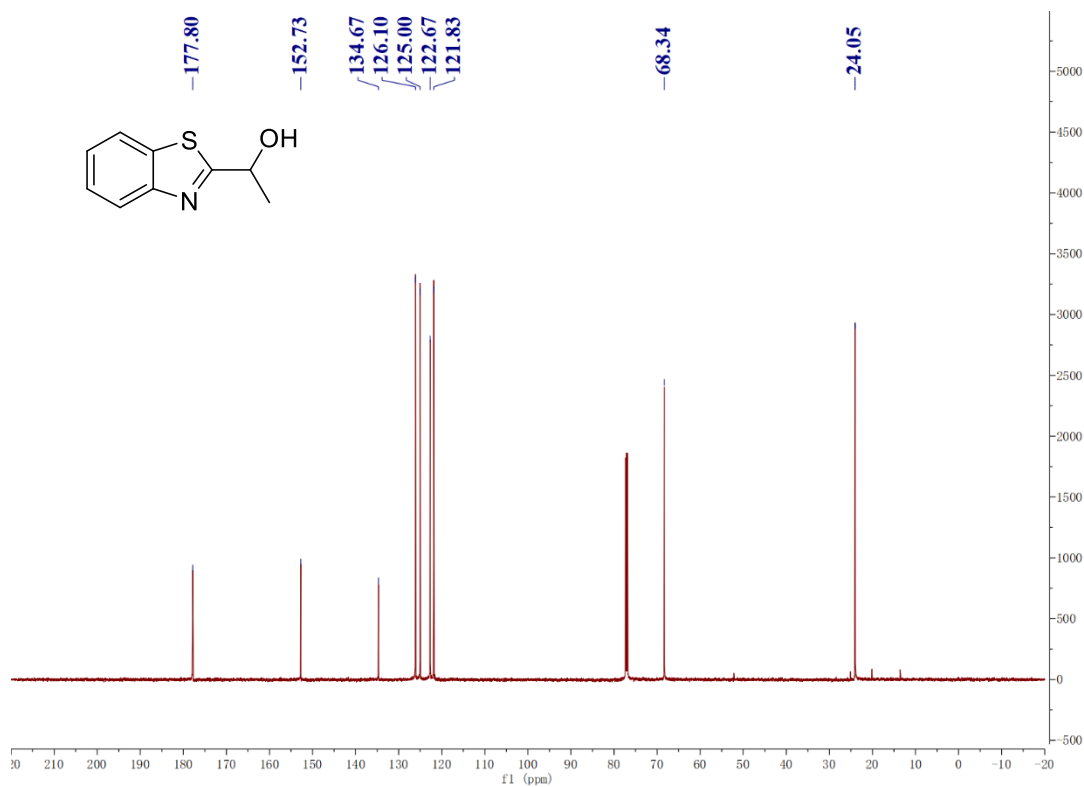

**<sup>1</sup>H NMR (600 MHz, CDCl<sub>3</sub>) of 4a'**

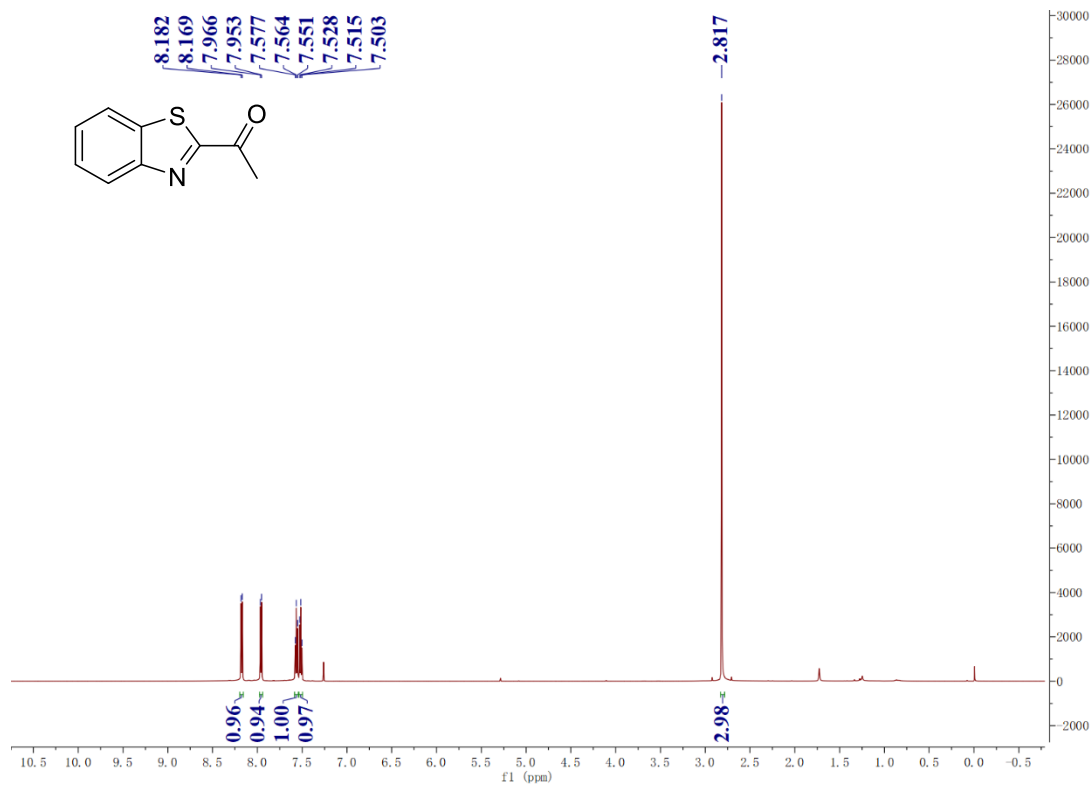

**<sup>13</sup>C NMR (151 MHz, CDCl<sub>3</sub>) of 4a'**

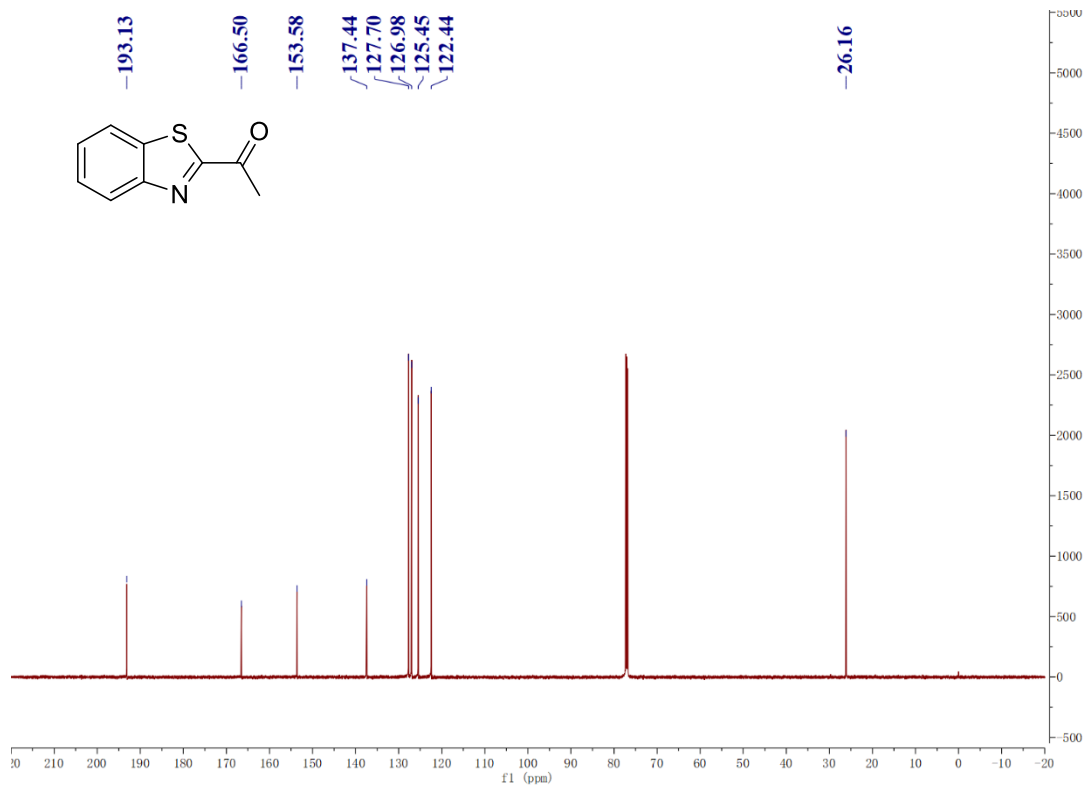

**<sup>1</sup>H NMR (600 MHz, CDCl<sub>3</sub>) of 4b**

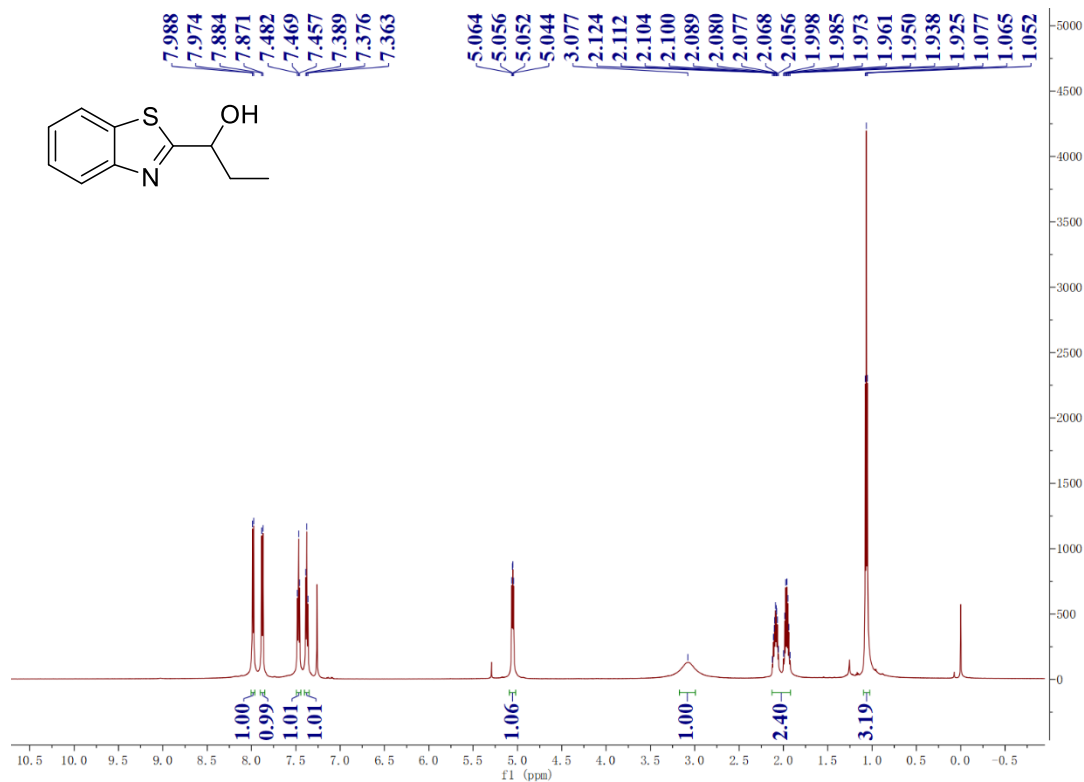

**<sup>13</sup>C NMR (151 MHz, CDCl<sub>3</sub>) of 4b**

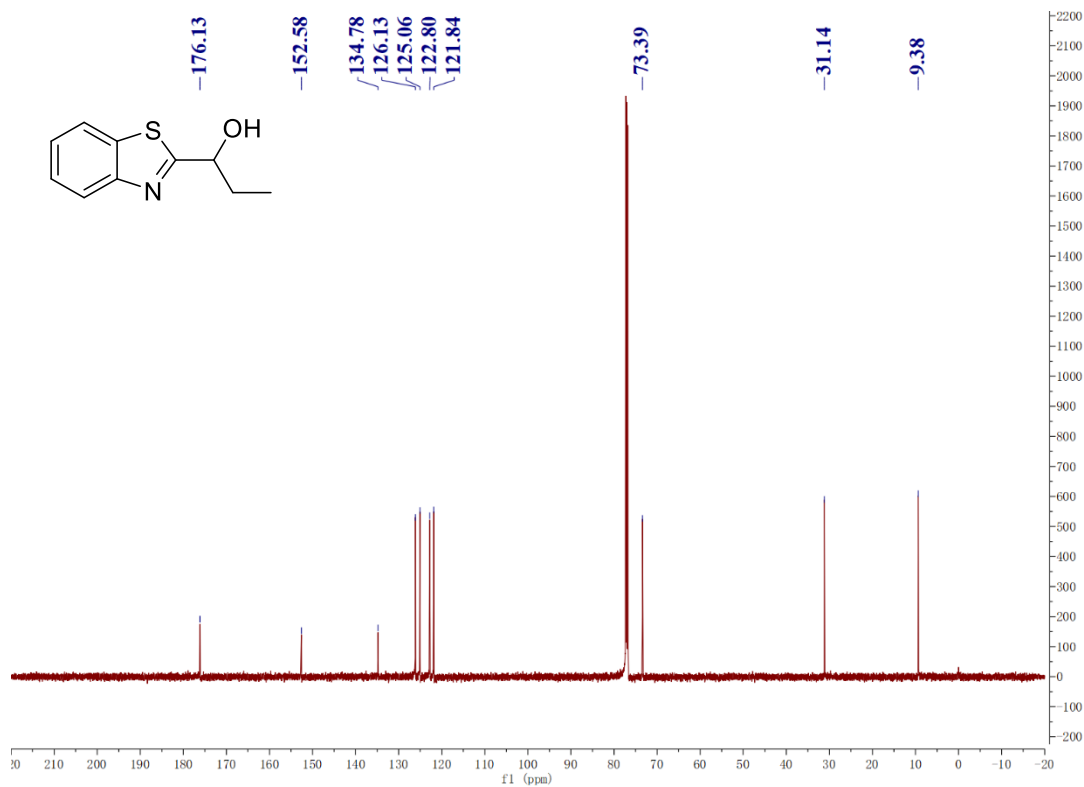

**<sup>1</sup>H NMR (600 MHz, CDCl<sub>3</sub>) of 4b'**

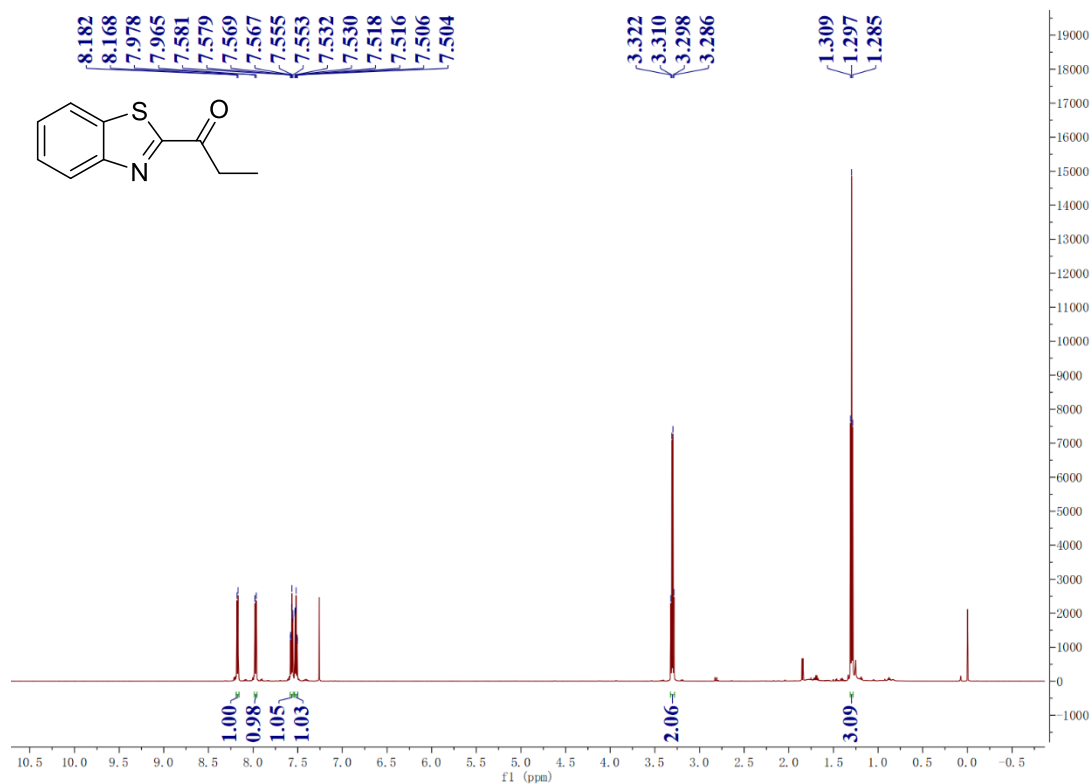

**<sup>13</sup>C NMR (151 MHz, CDCl<sub>3</sub>) of 4b'**

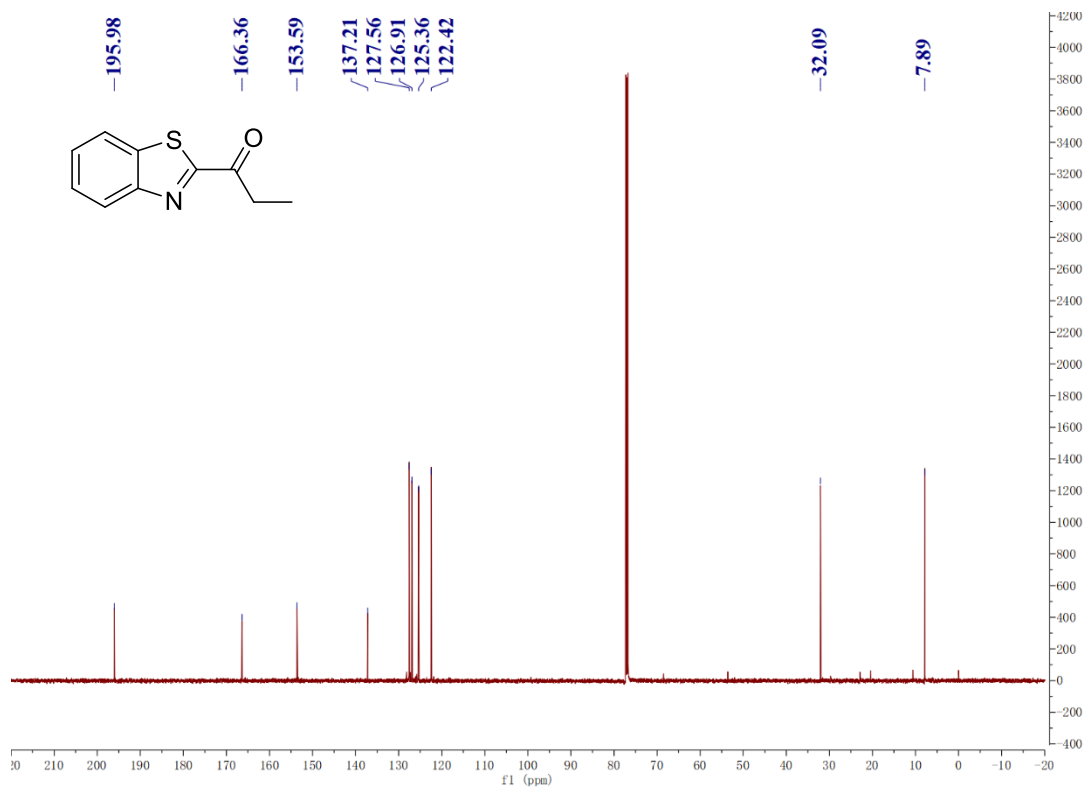

**<sup>1</sup>H NMR (400 MHz, CDCl<sub>3</sub>) of 4c**

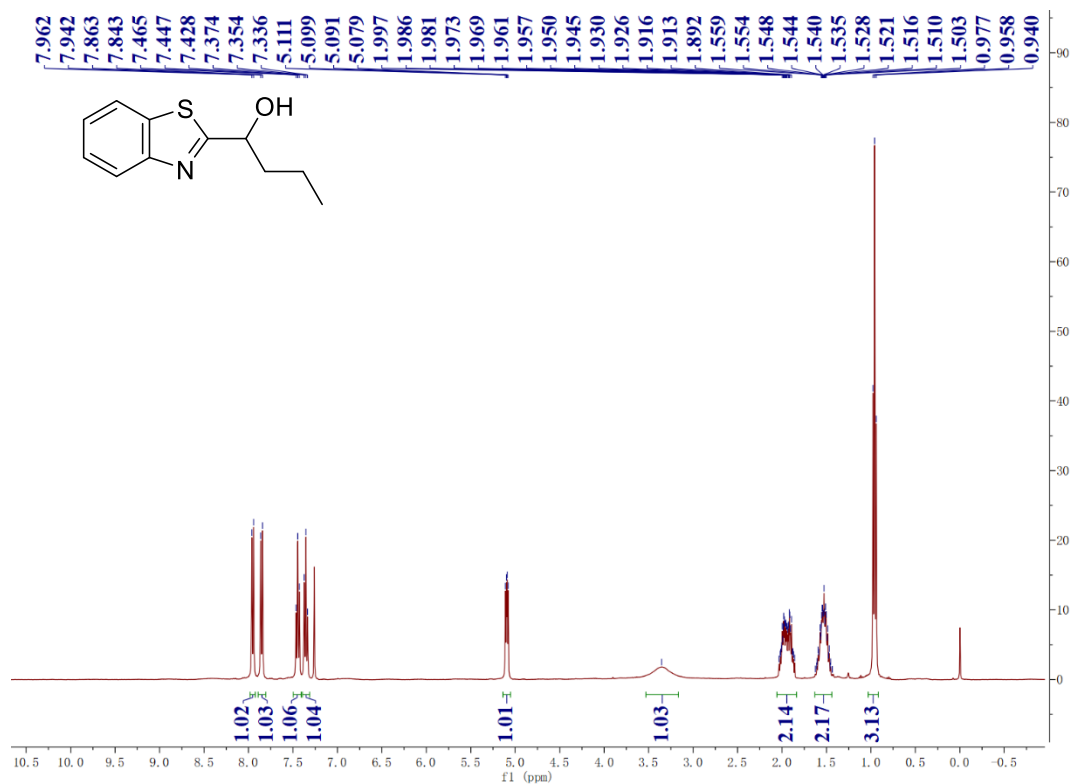

**<sup>13</sup>C NMR (101 MHz, CDCl<sub>3</sub>) of 4c**

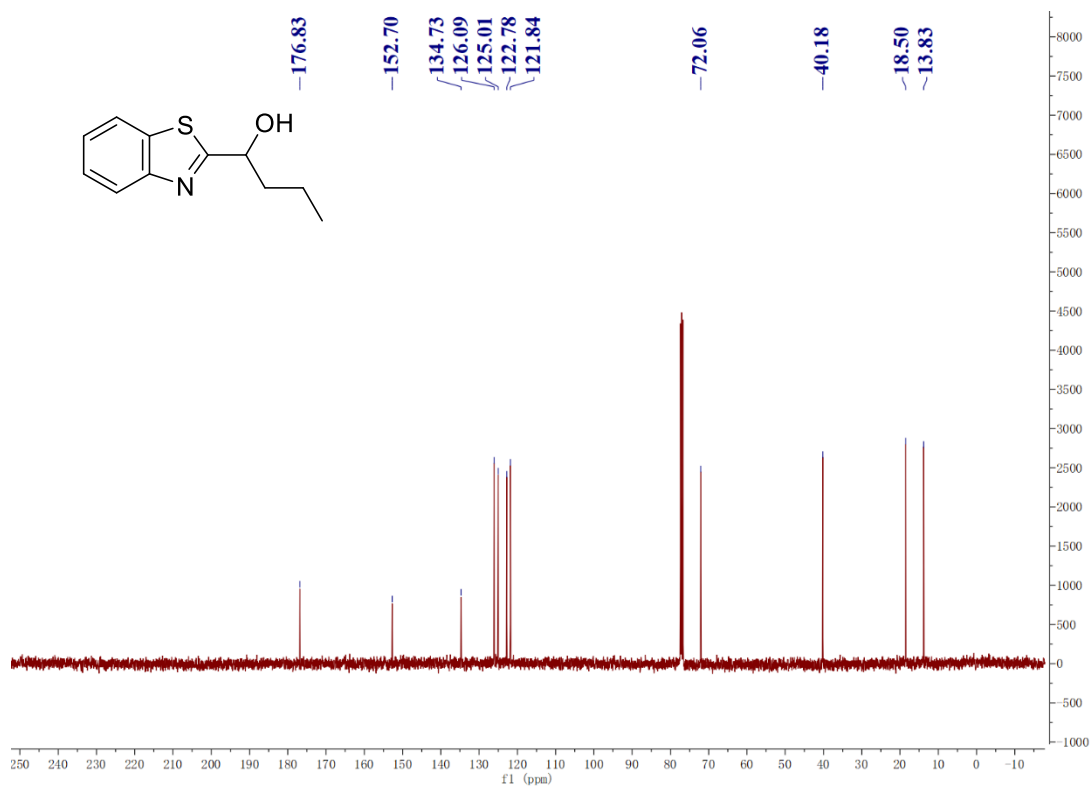



**<sup>1</sup>H NMR (400 MHz, CDCl<sub>3</sub>) of 4c'**

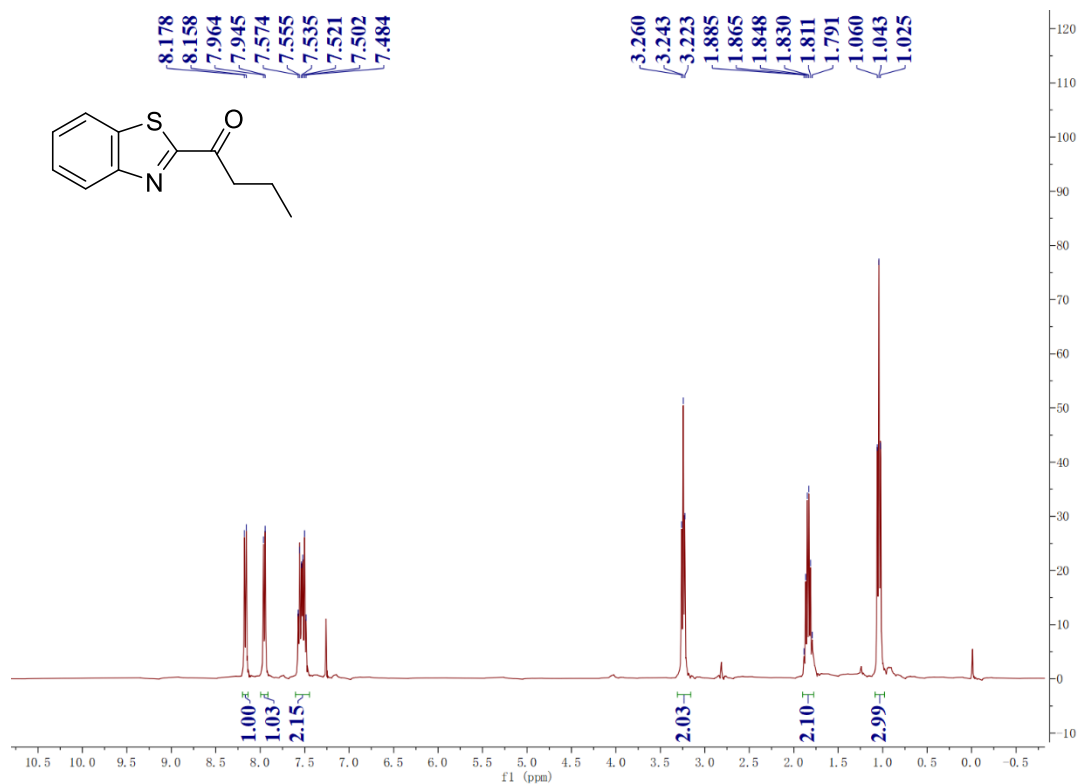

**<sup>13</sup>C NMR (101 MHz, CDCl<sub>3</sub>) of 4c'**

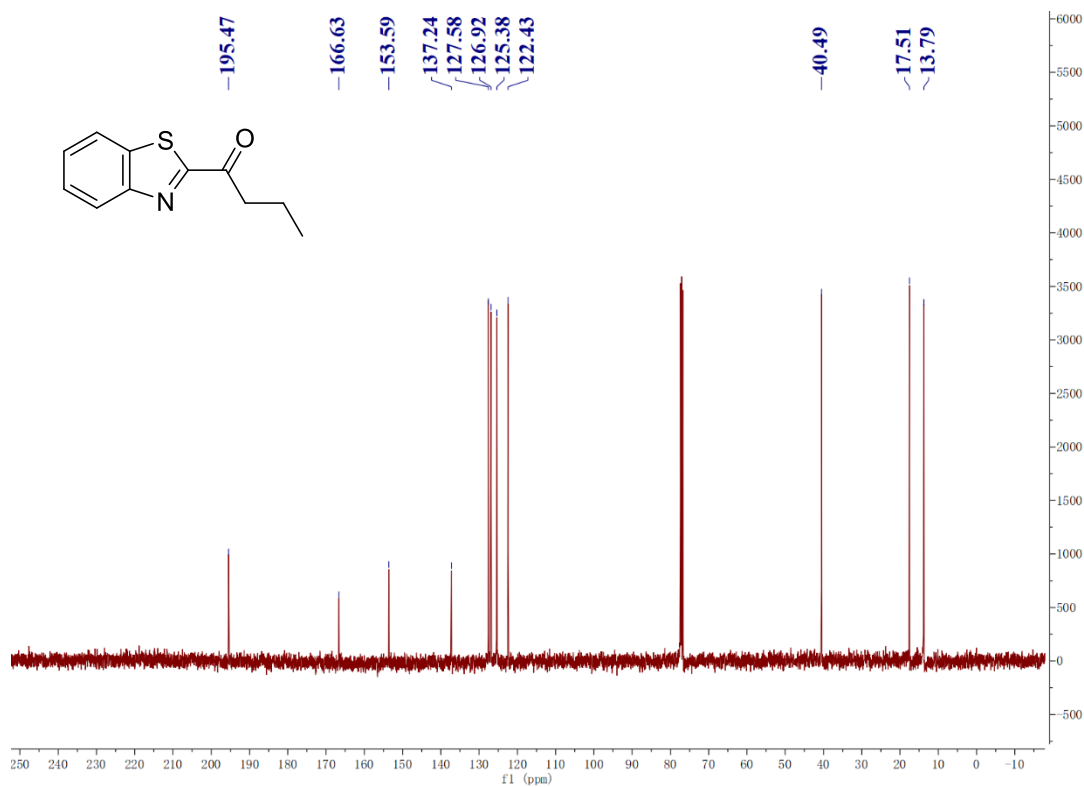

**<sup>1</sup>H NMR (600 MHz, CDCl<sub>3</sub>) of 4d**

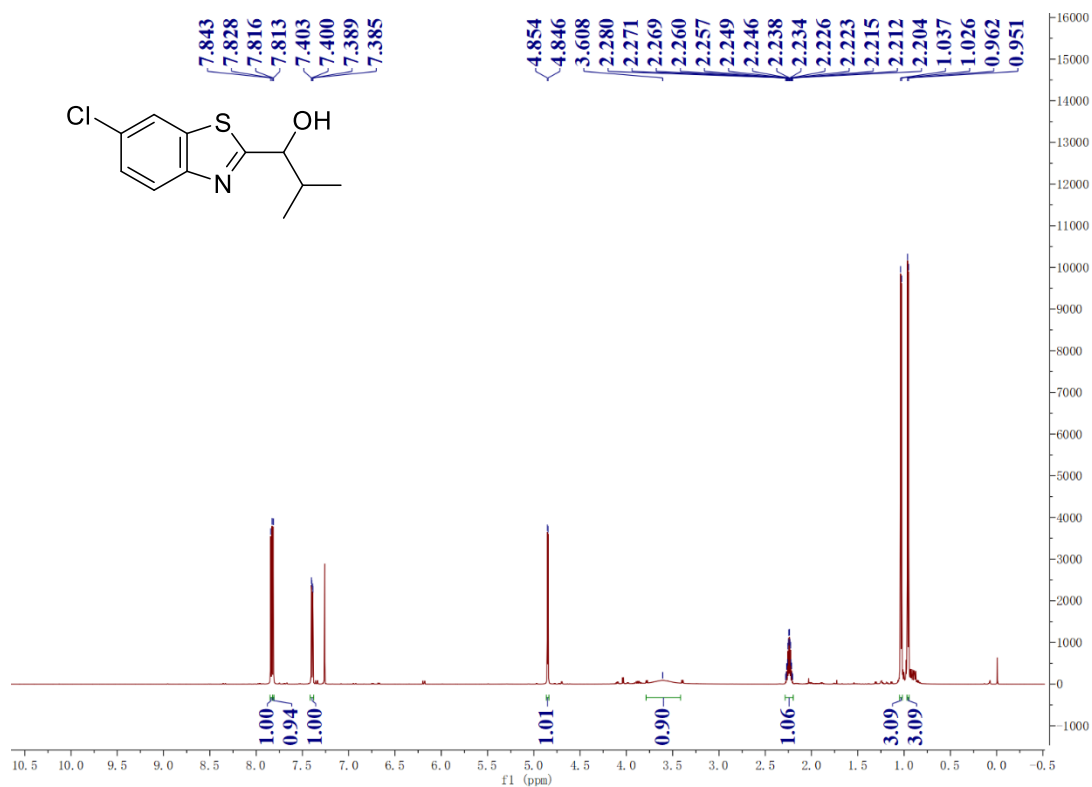

**<sup>13</sup>C NMR (151 MHz, CDCl<sub>3</sub>) of 4d**

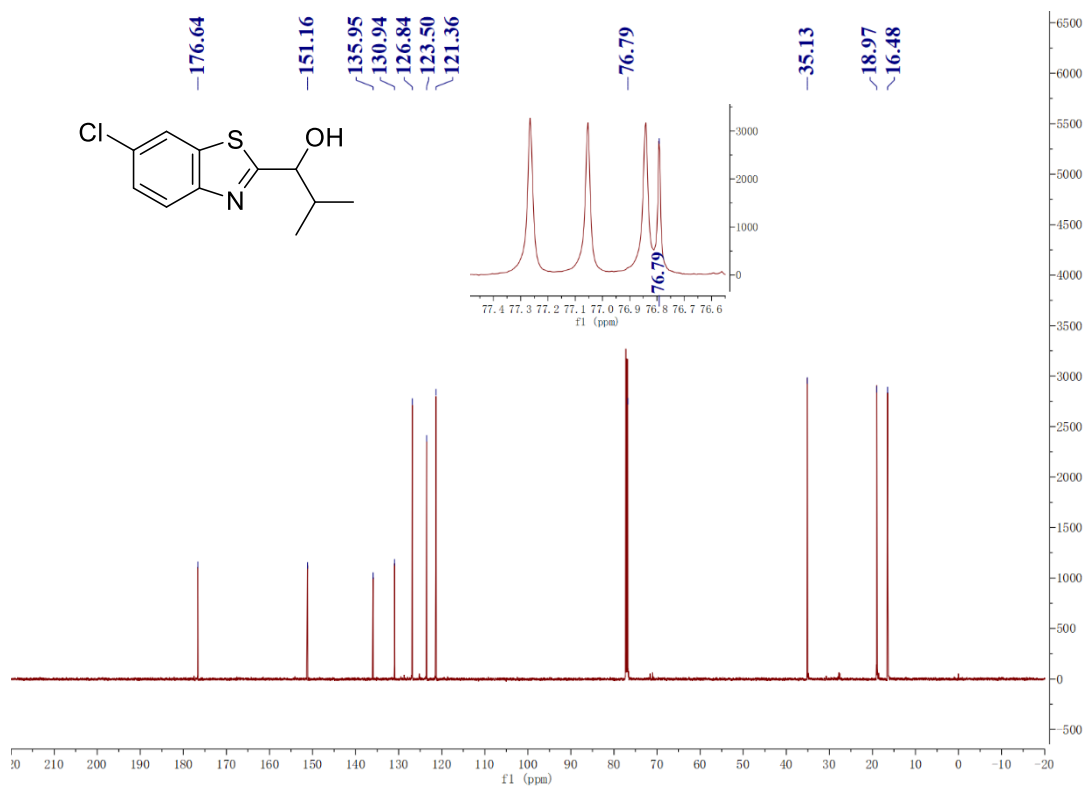

**<sup>1</sup>H NMR (600 MHz, CDCl<sub>3</sub>) of 4d'**

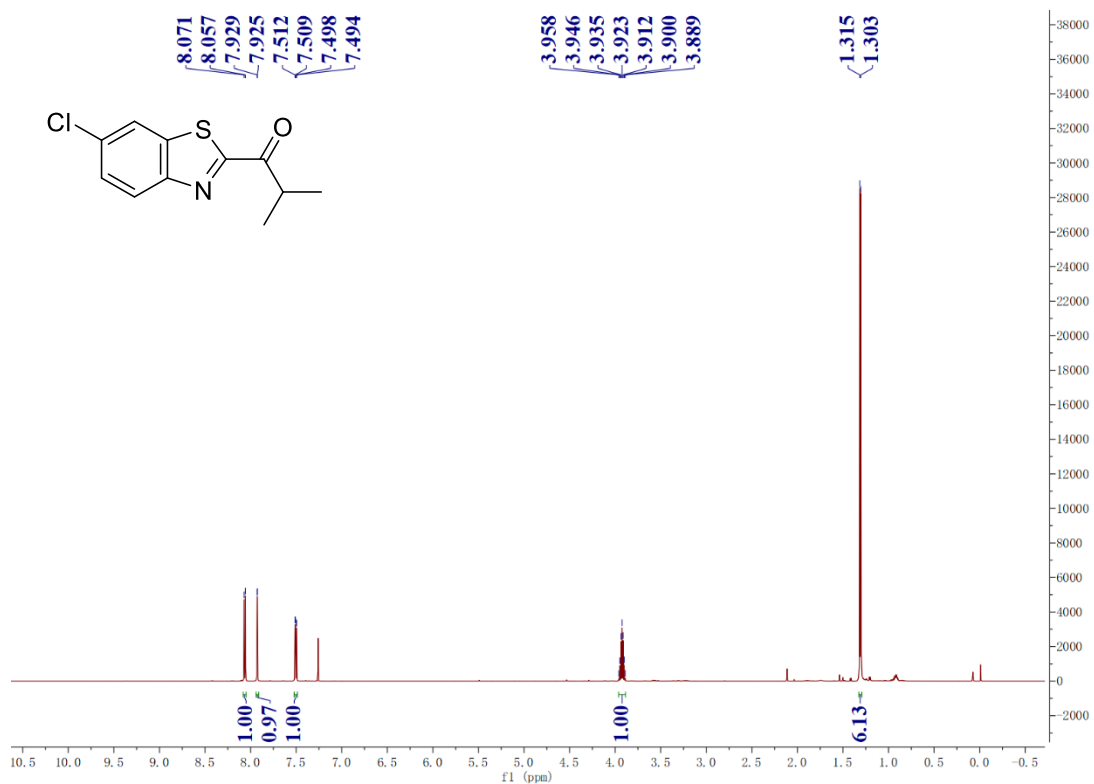

**<sup>13</sup>C NMR (151 MHz, CDCl<sub>3</sub>) of 4d'**

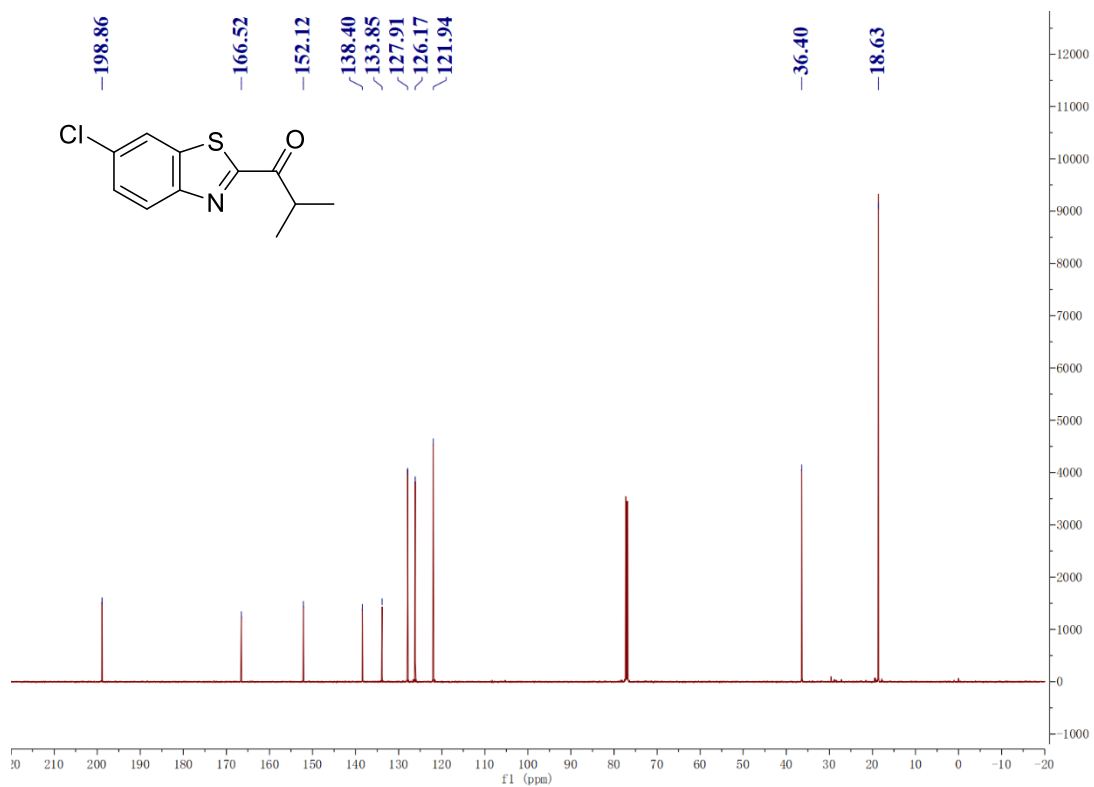

**<sup>1</sup>H NMR (600 MHz, CDCl<sub>3</sub>) of 4e**

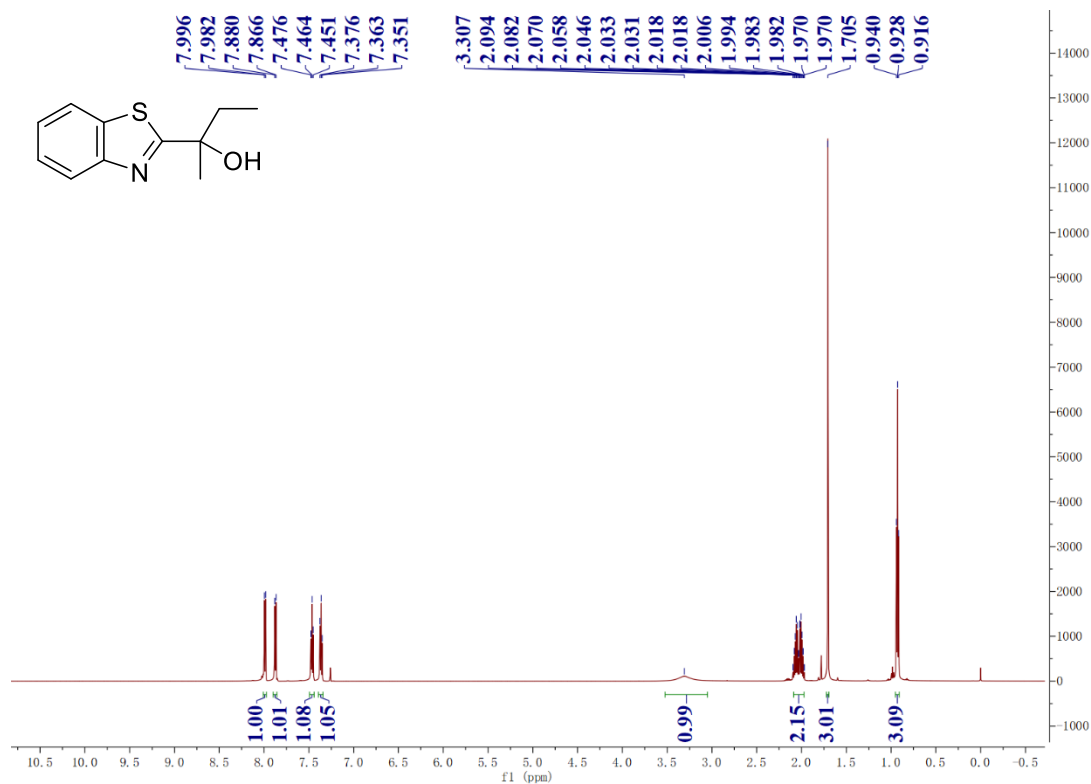

**<sup>13</sup>C NMR (151 MHz, CDCl<sub>3</sub>) of 4e**

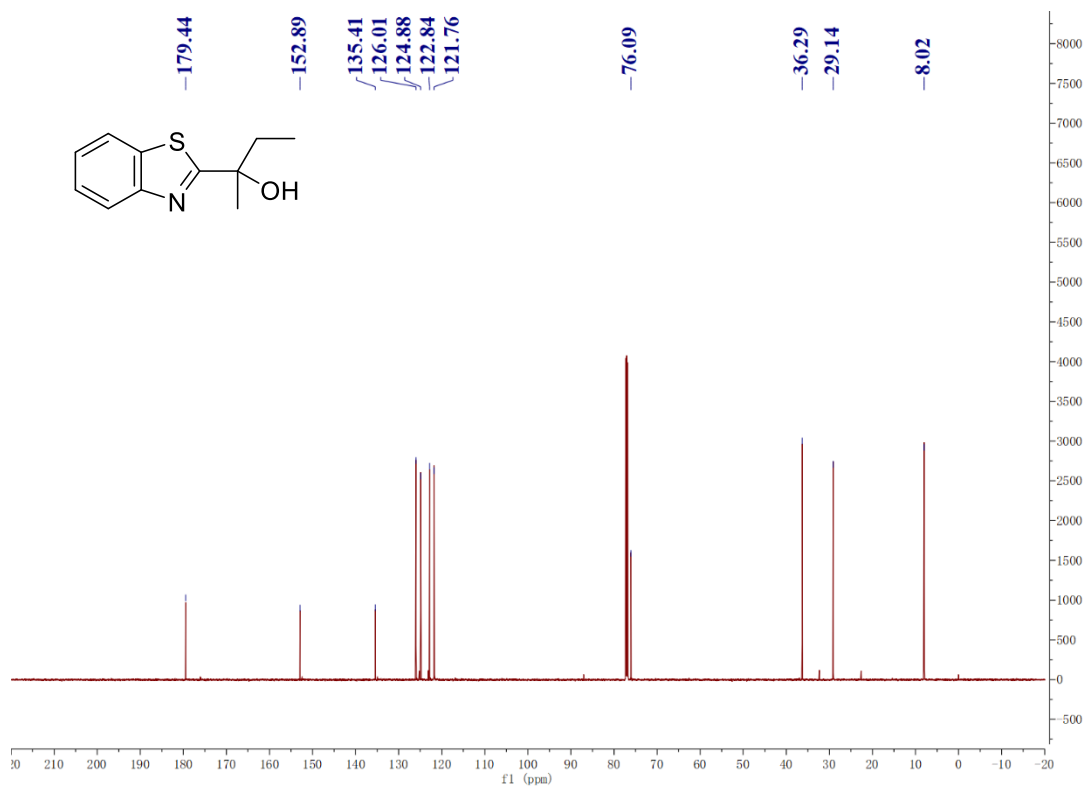

**<sup>1</sup>H NMR (400 MHz, CDCl<sub>3</sub>) of 4e'**

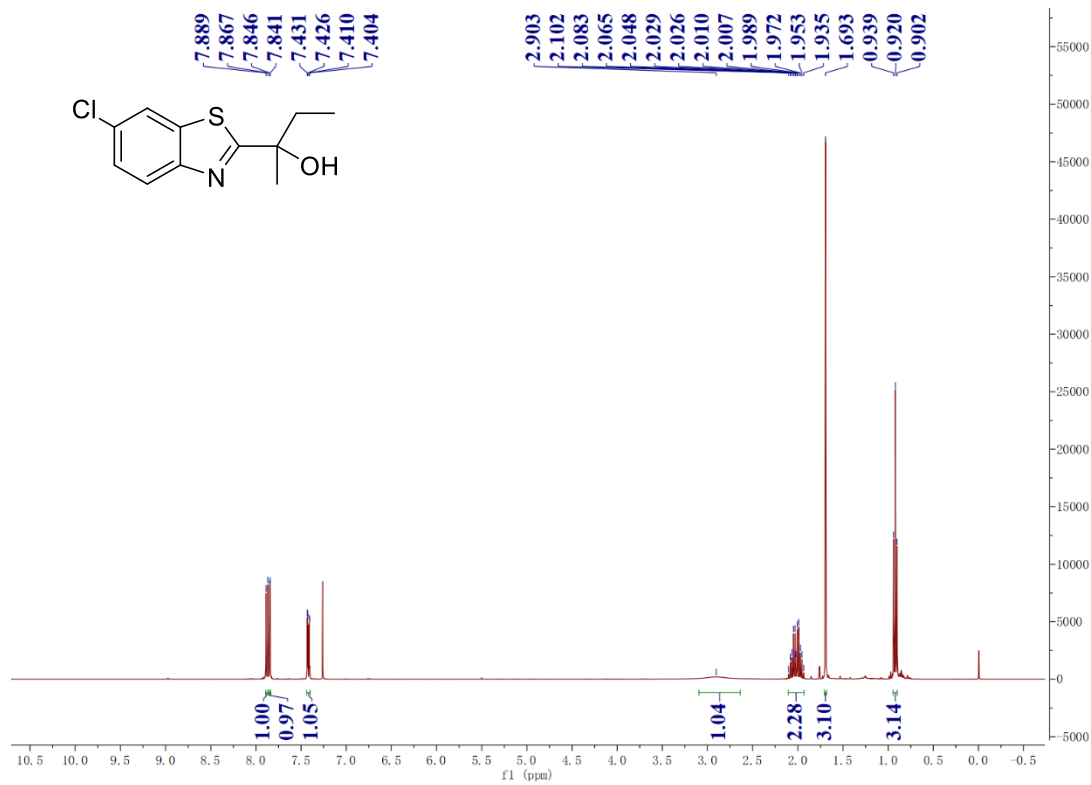

**<sup>13</sup>C NMR (101 MHz, CDCl<sub>3</sub>) of 4e'**

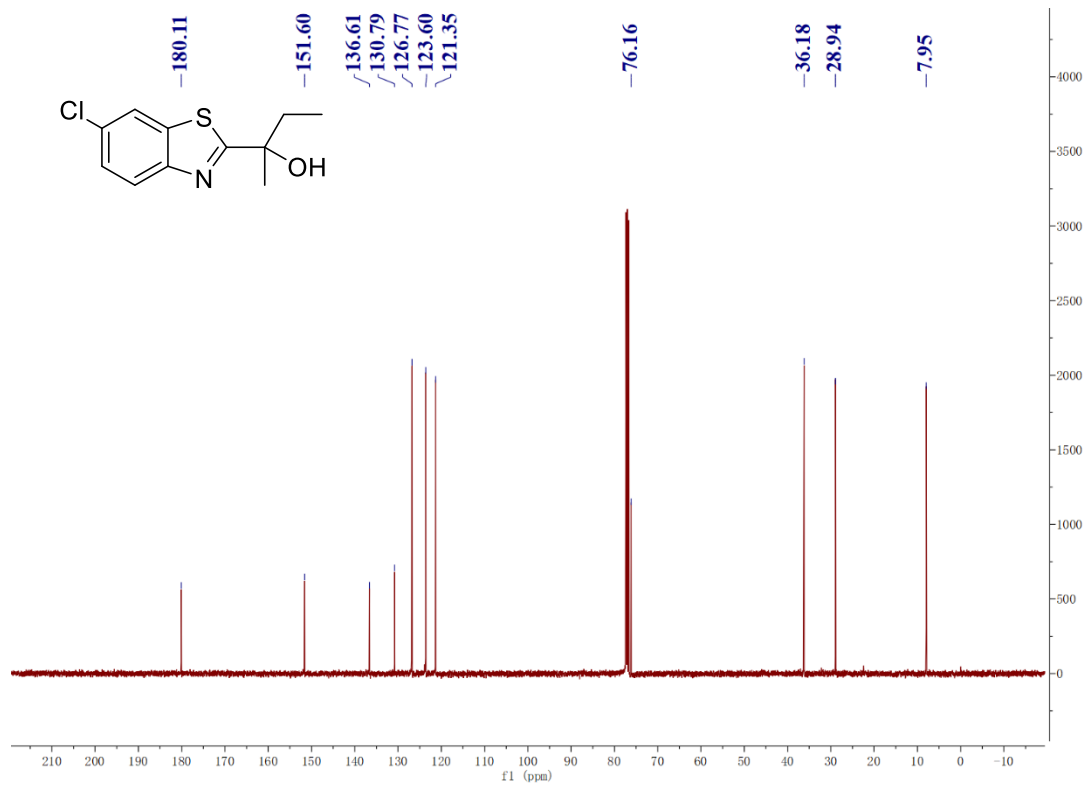

**<sup>1</sup>H NMR (600 MHz, CDCl<sub>3</sub>) of 4f**

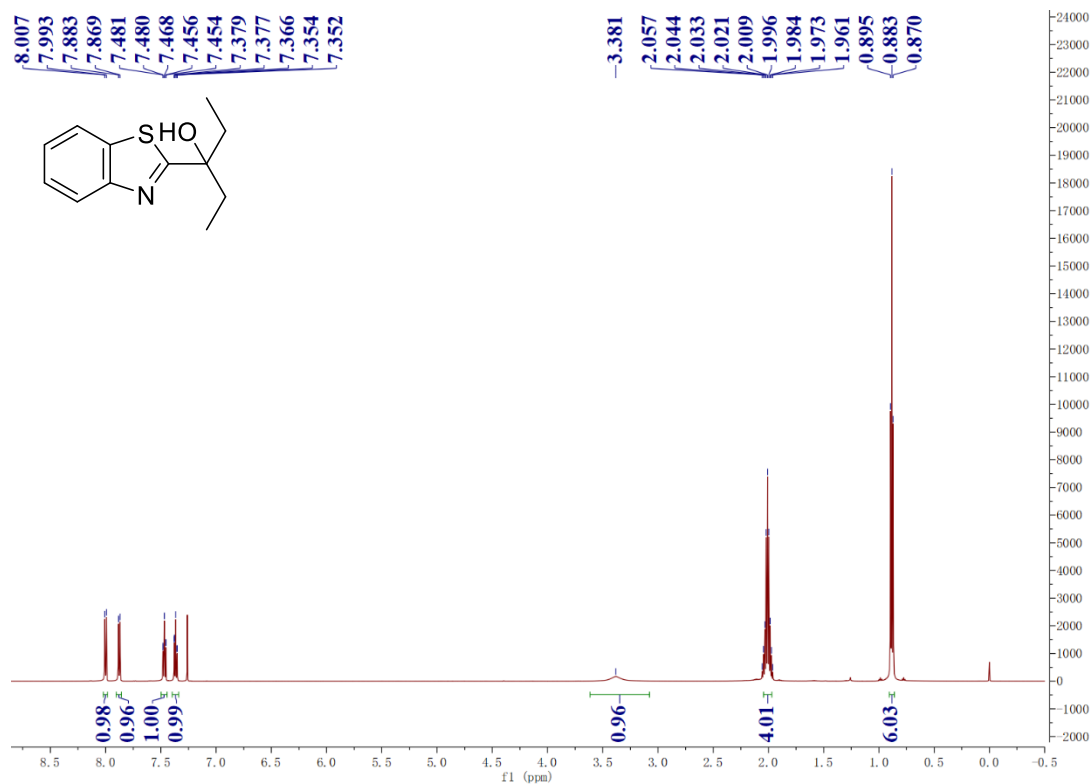

**<sup>13</sup>C NMR (151 MHz, CDCl<sub>3</sub>) of 4f**

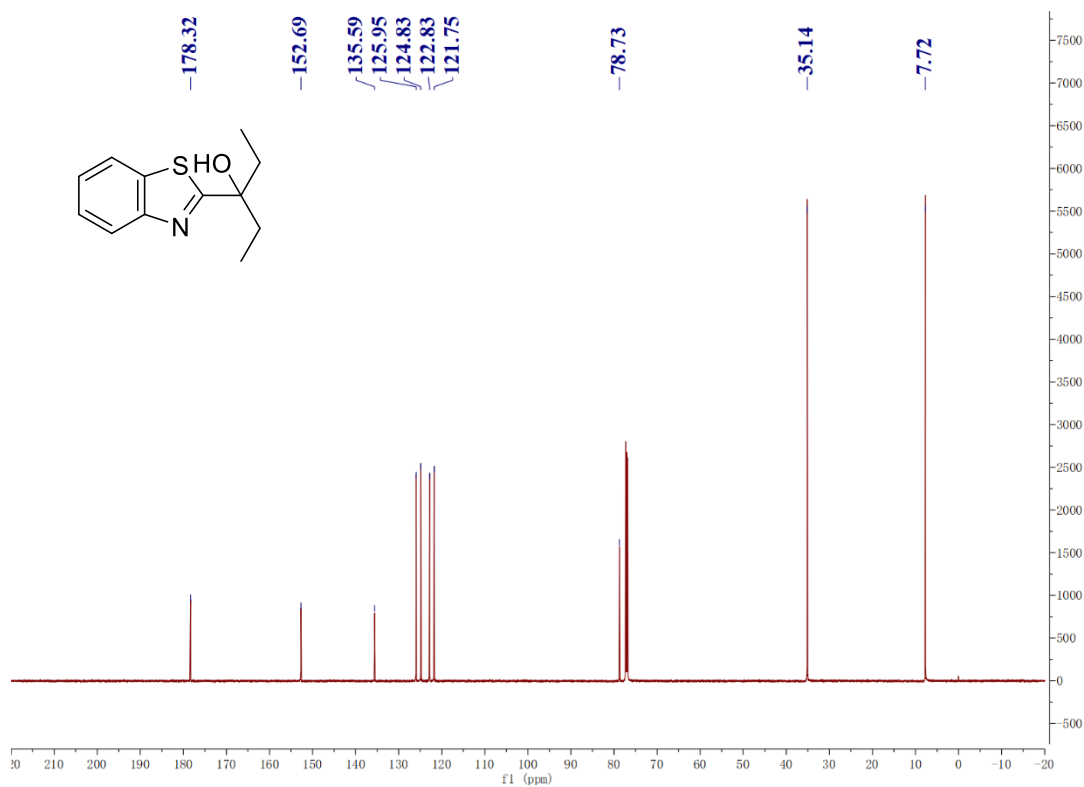

**<sup>1</sup>H NMR (600 MHz, CDCl<sub>3</sub>) of 4g**

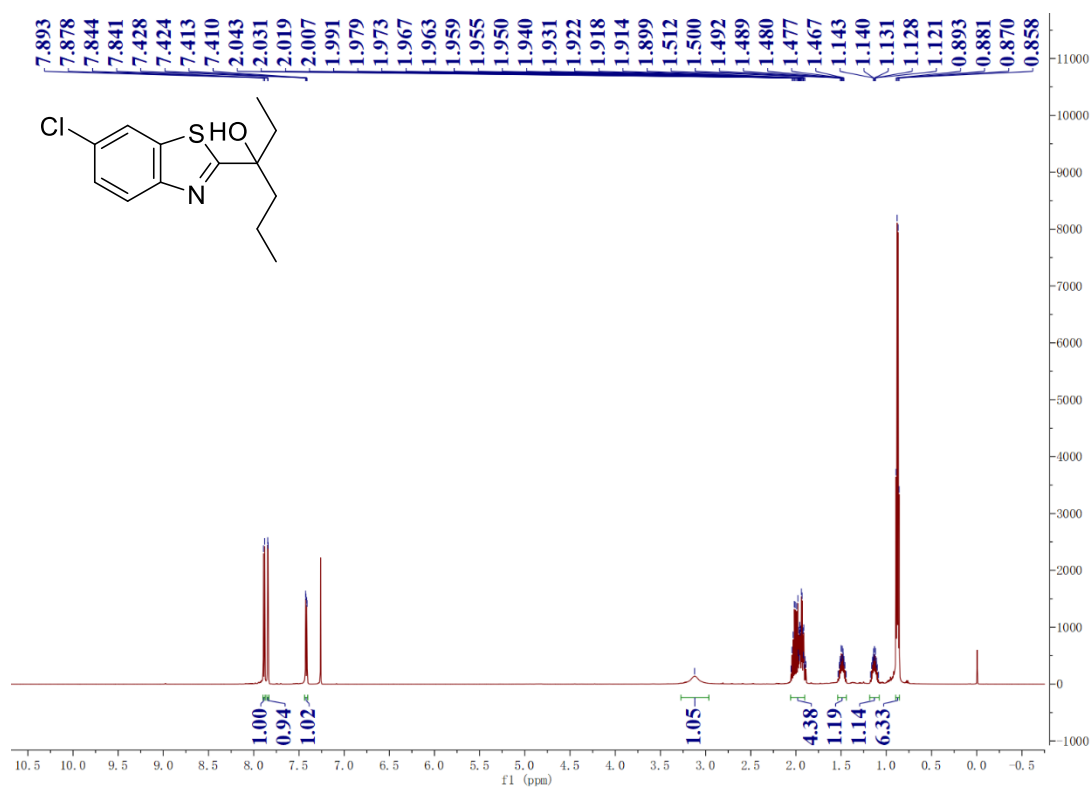

**<sup>13</sup>C NMR (151 MHz, CDCl<sub>3</sub>) of 4g**

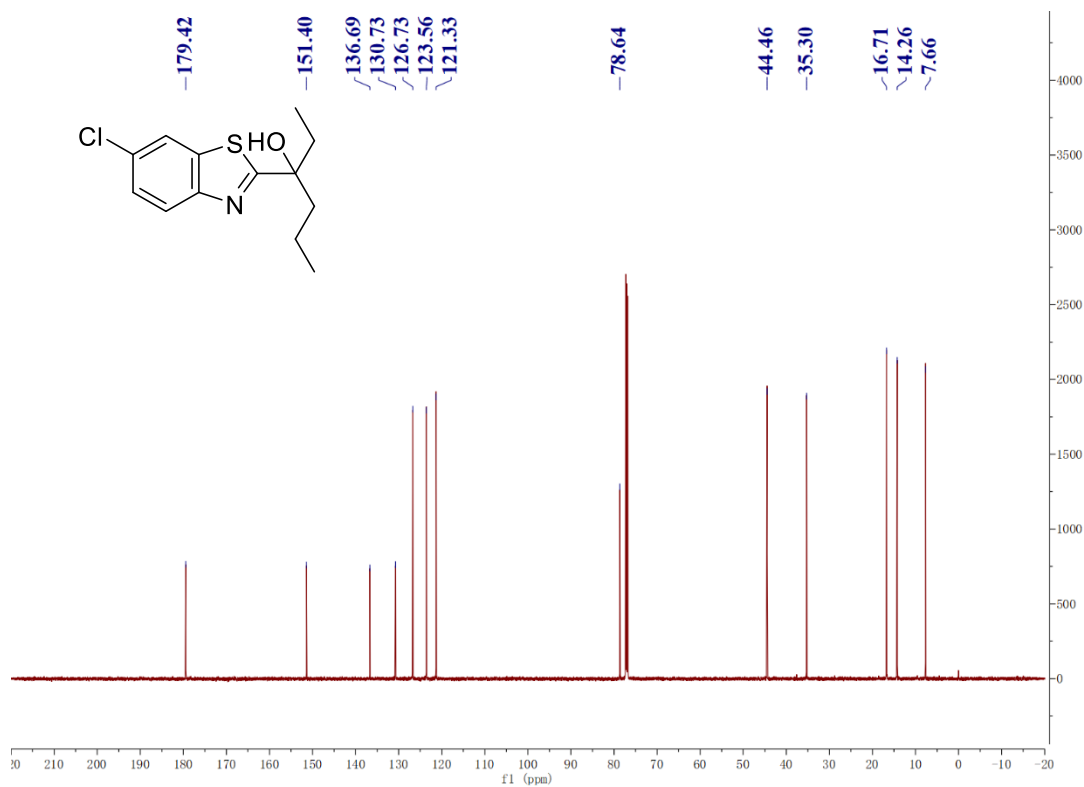

### <sup>1</sup>H NMR (400 MHz, CDCl<sub>3</sub>) of 4h

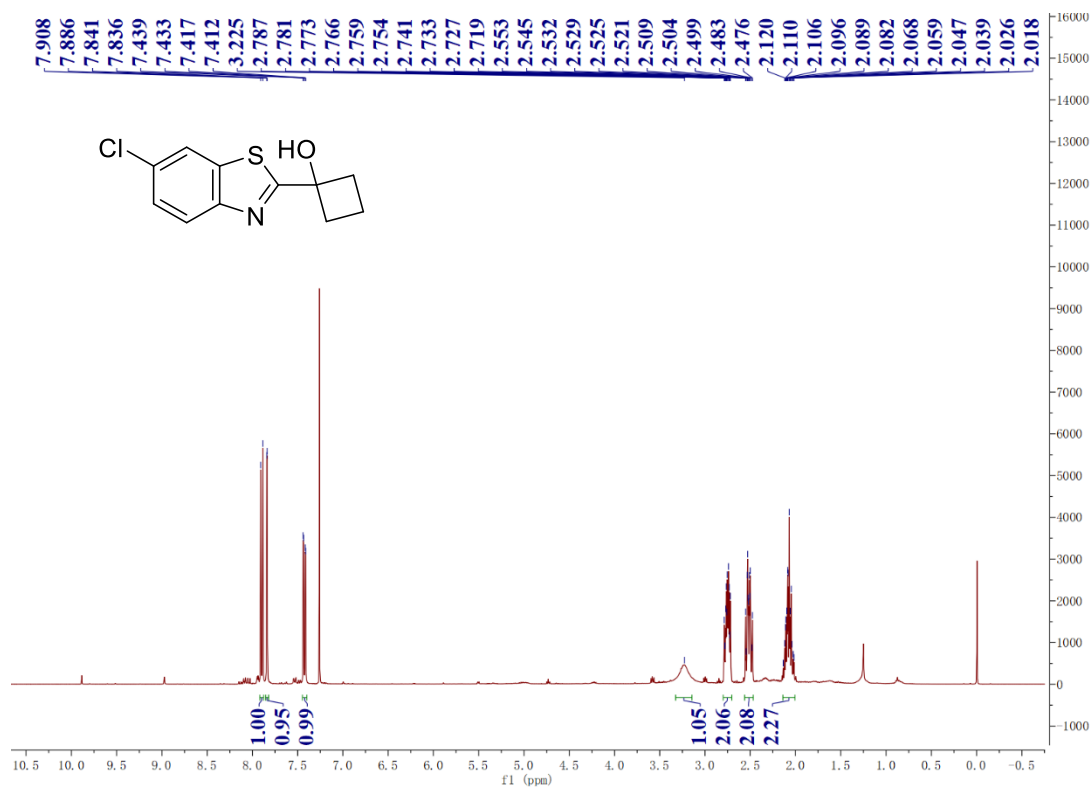

### <sup>13</sup>C NMR (151 MHz, CDCl<sub>3</sub>) of 4h

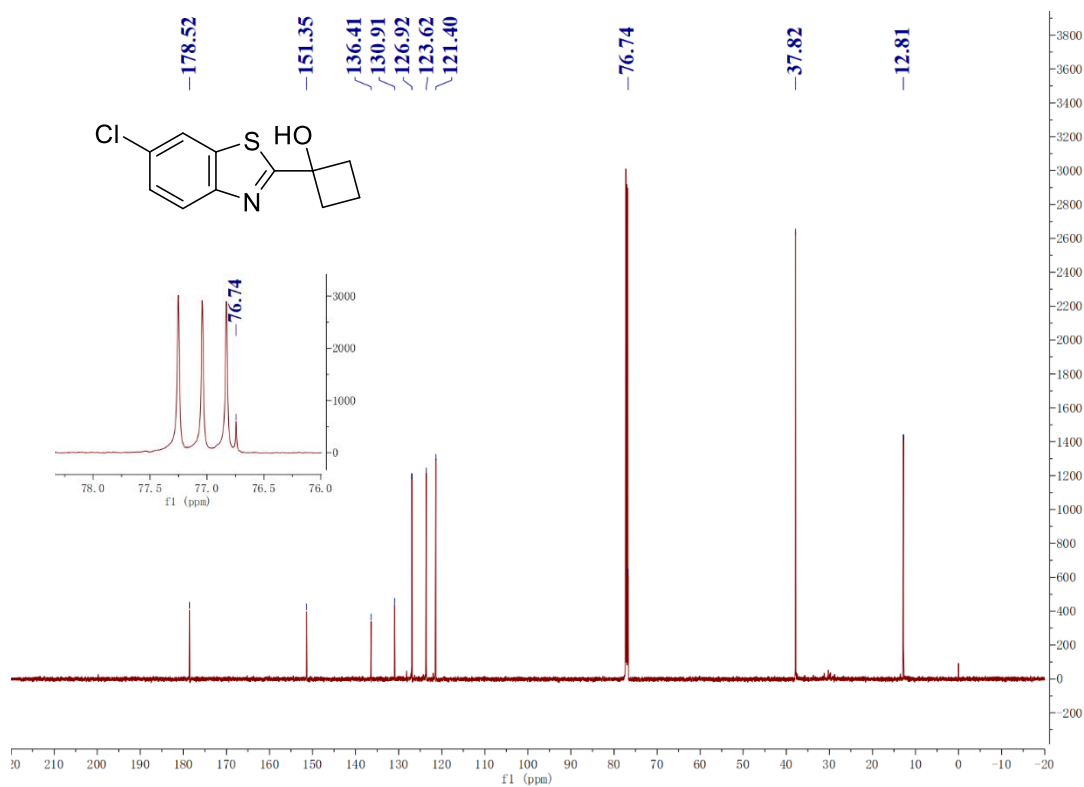



**<sup>1</sup>H NMR (600 MHz, CDCl<sub>3</sub>) of 4i**

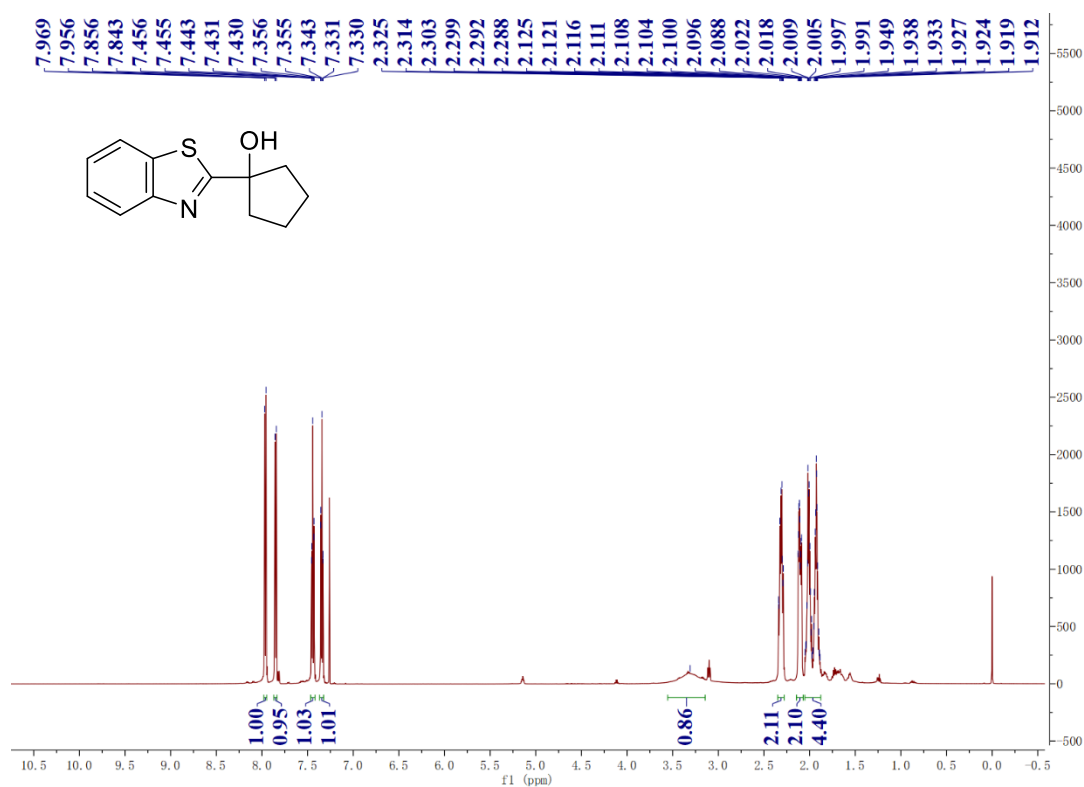

**<sup>13</sup>C NMR (151 MHz, CDCl<sub>3</sub>) of 4i**

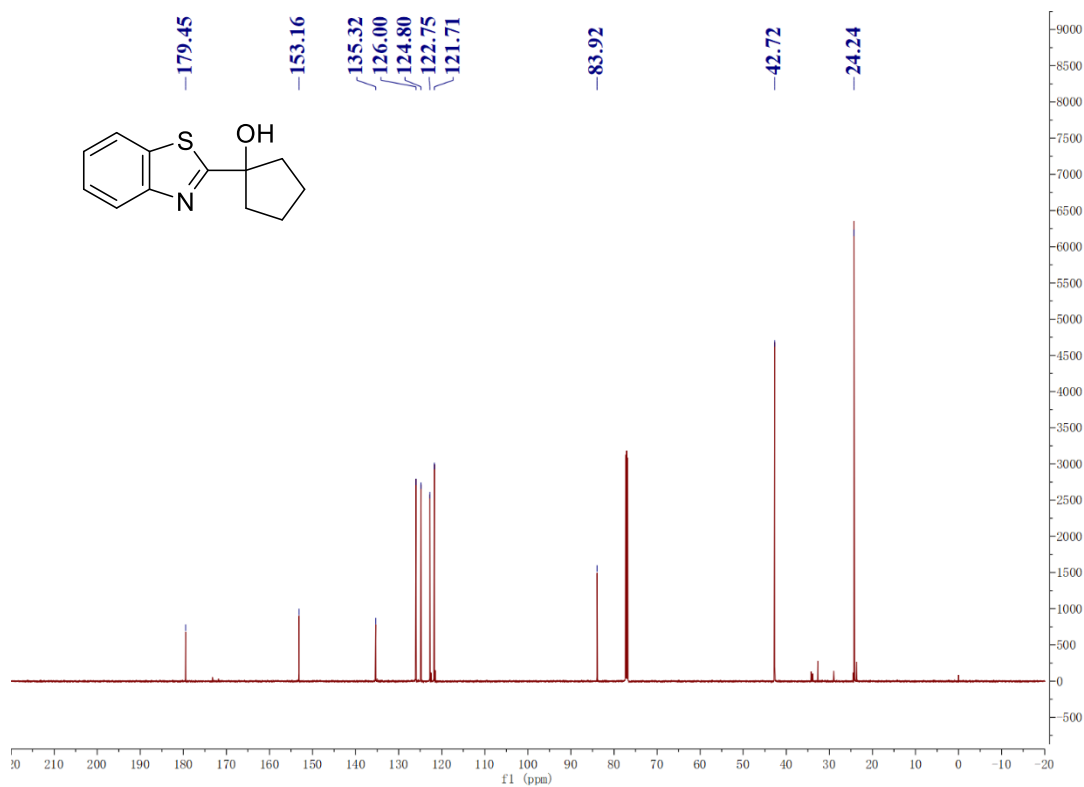

### <sup>1</sup>H NMR (600 MHz, CDCl<sub>3</sub>) of 4j

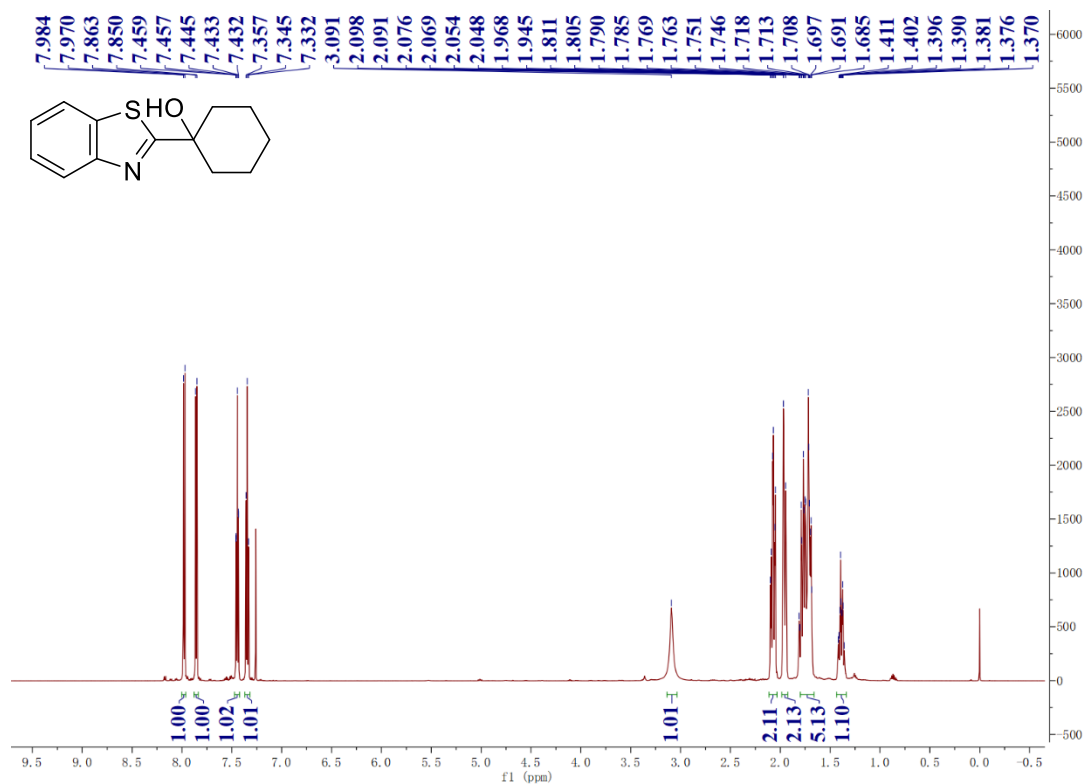

### <sup>13</sup>C NMR (151 MHz, CDCl<sub>3</sub>) of 4j

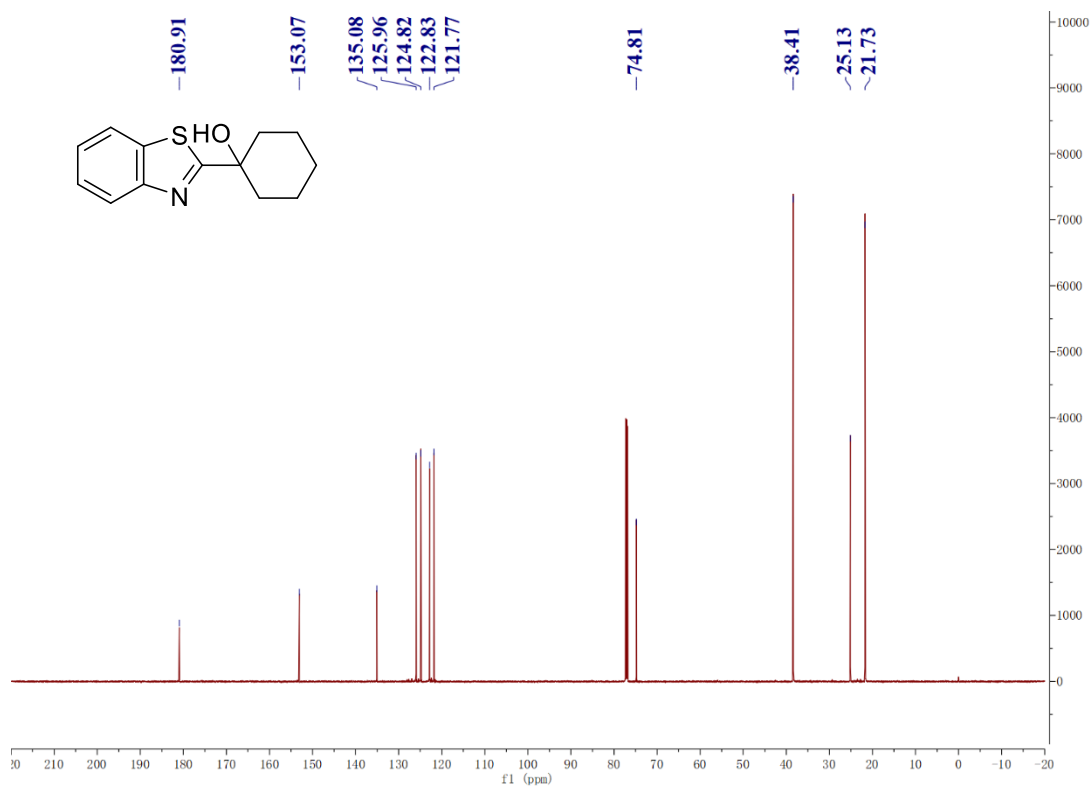

**<sup>1</sup>H NMR (400 MHz, CDCl<sub>3</sub>) of 4k**

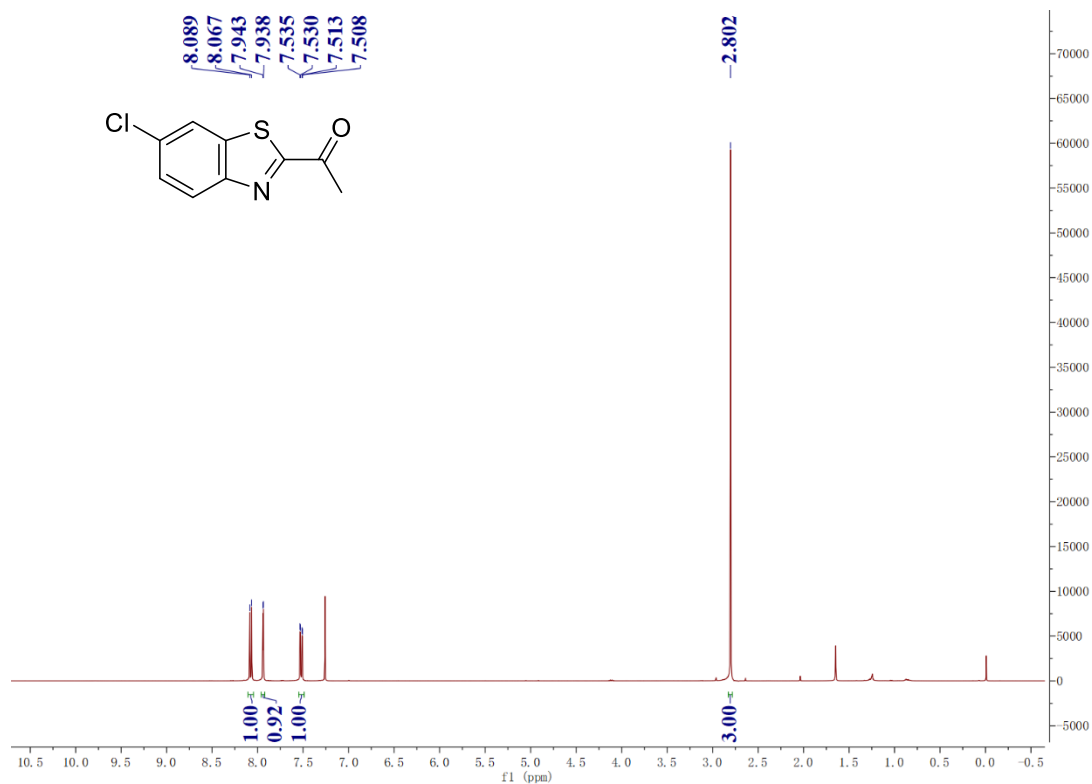

**<sup>13</sup>C NMR (101 MHz, CDCl<sub>3</sub>) of 4k**

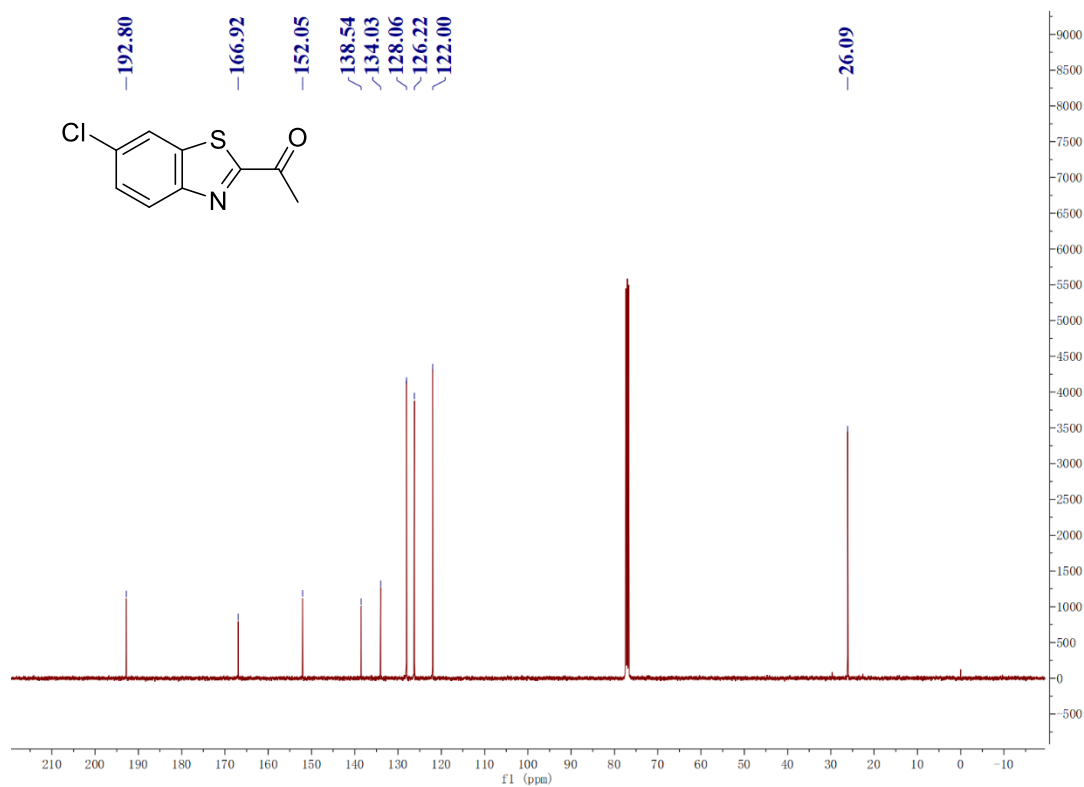

### <sup>1</sup>H NMR (600 MHz, CDCl<sub>3</sub>) of 4l

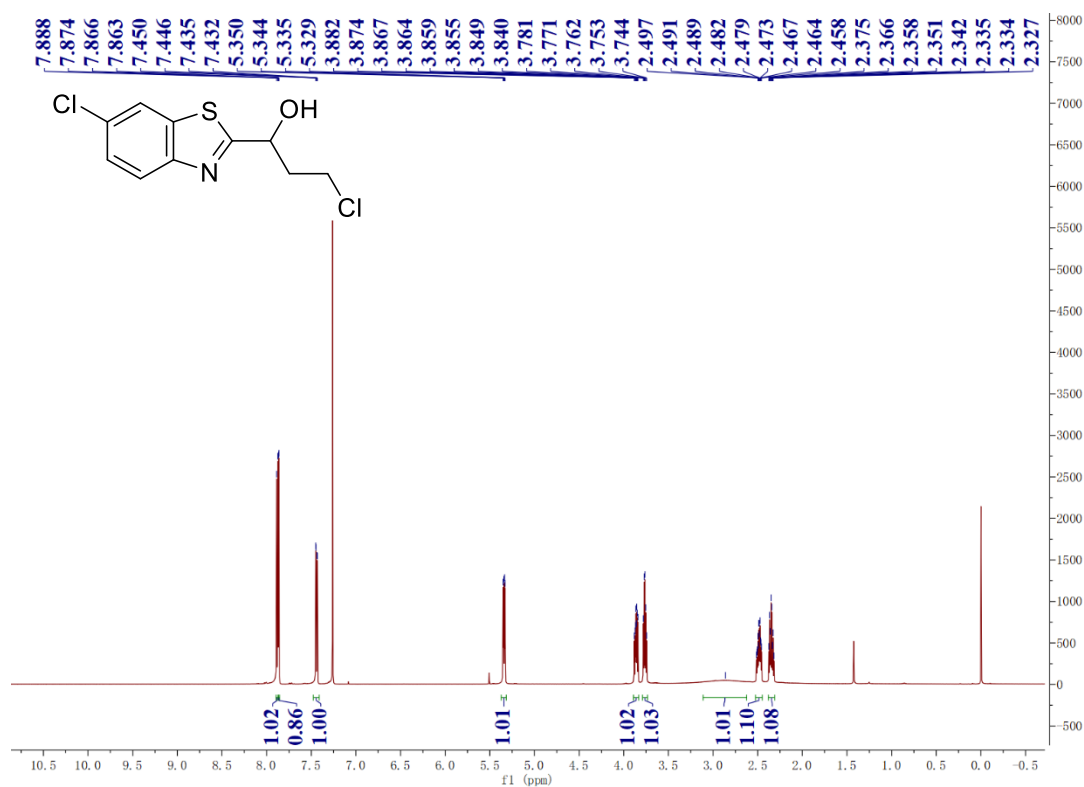

### <sup>13</sup>C NMR (151 MHz, CDCl<sub>3</sub>) of 4l

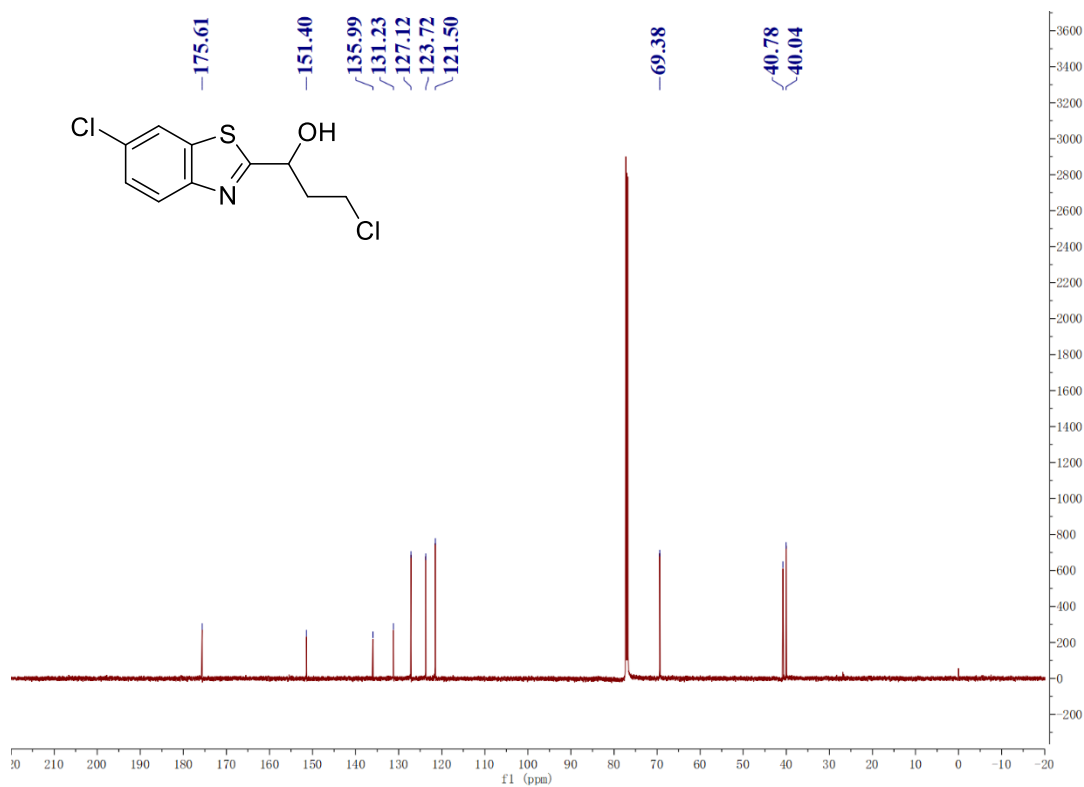

**<sup>1</sup>H NMR (600 MHz, DMSO-*d*<sub>6</sub>) of 4m**

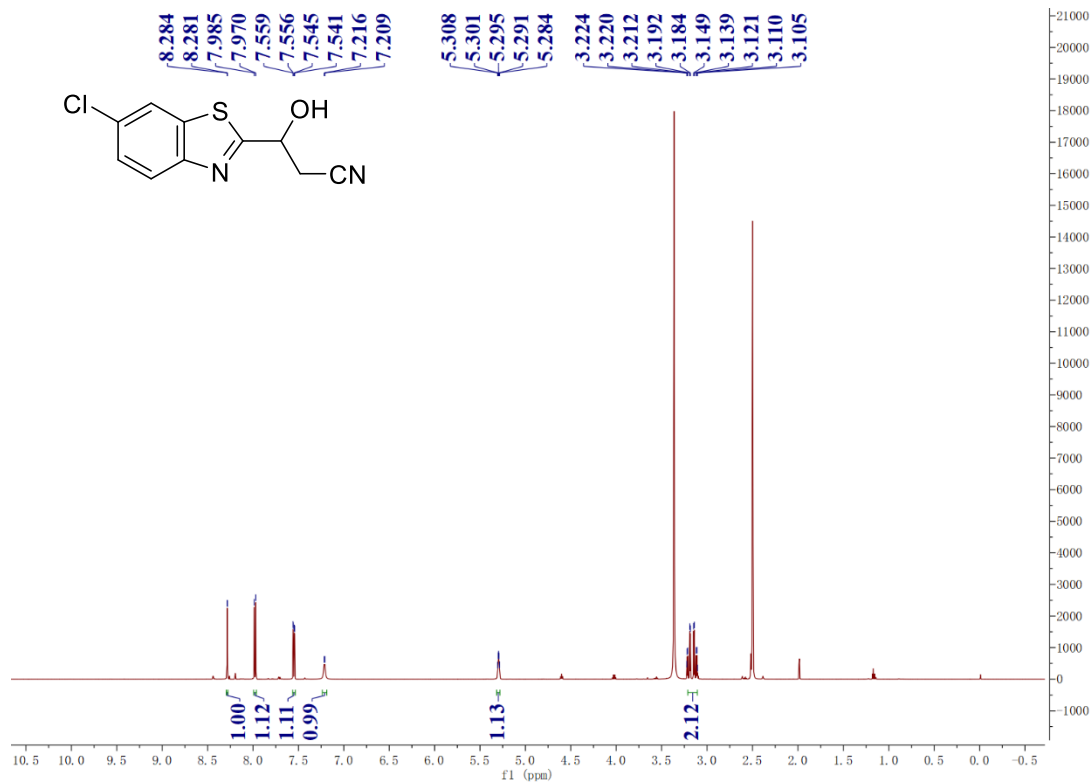

**<sup>13</sup>C NMR (151 MHz, DMSO-*d*<sub>6</sub>) of 4m**

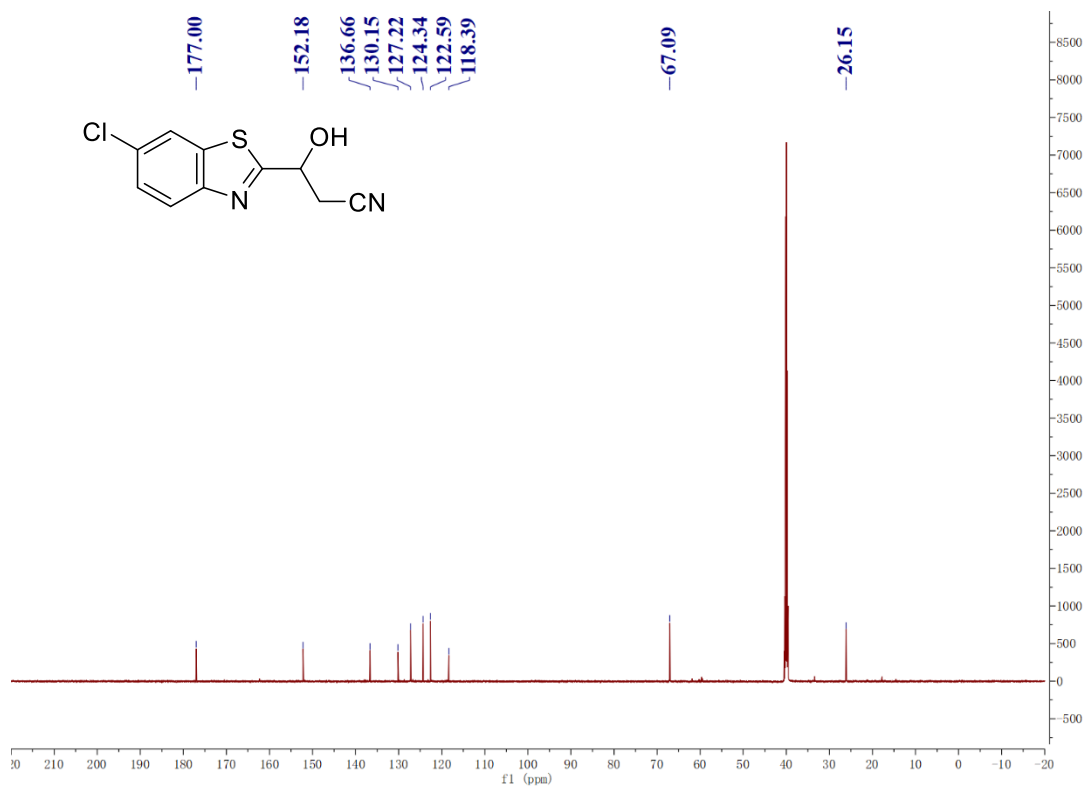

**<sup>1</sup>H NMR (600 MHz, CDCl<sub>3</sub>) of 6a**

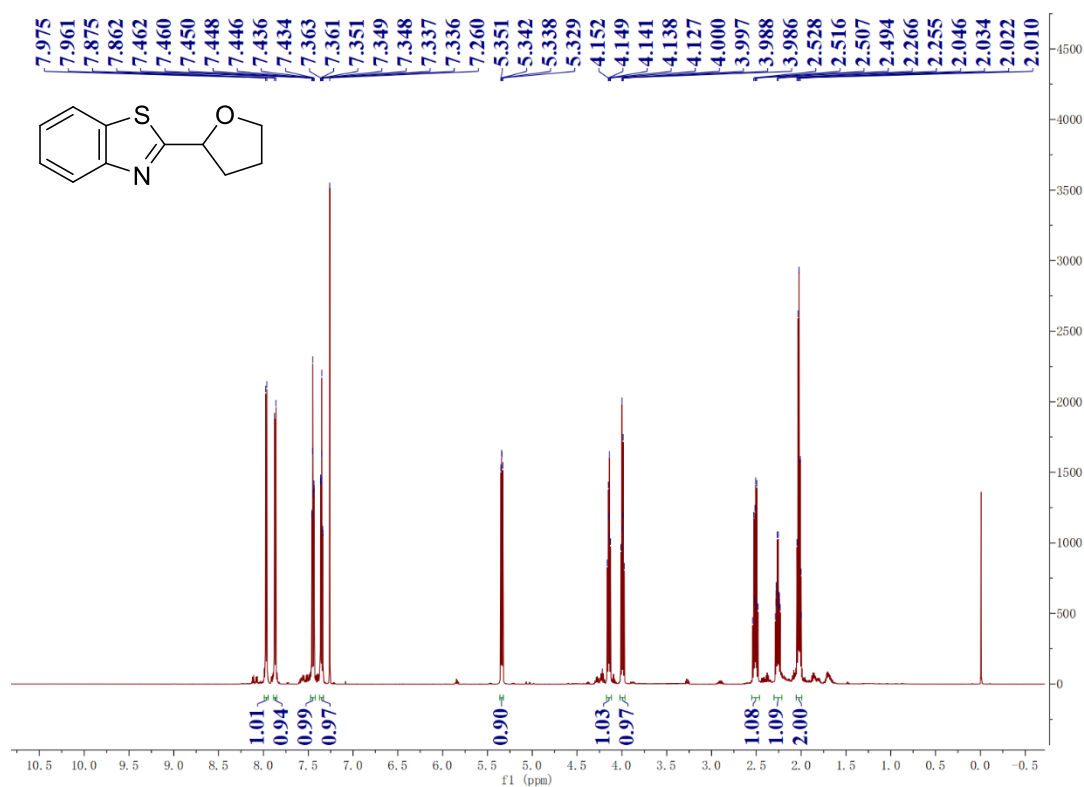

**<sup>13</sup>C NMR (151 MHz, CDCl<sub>3</sub>) of 6a**

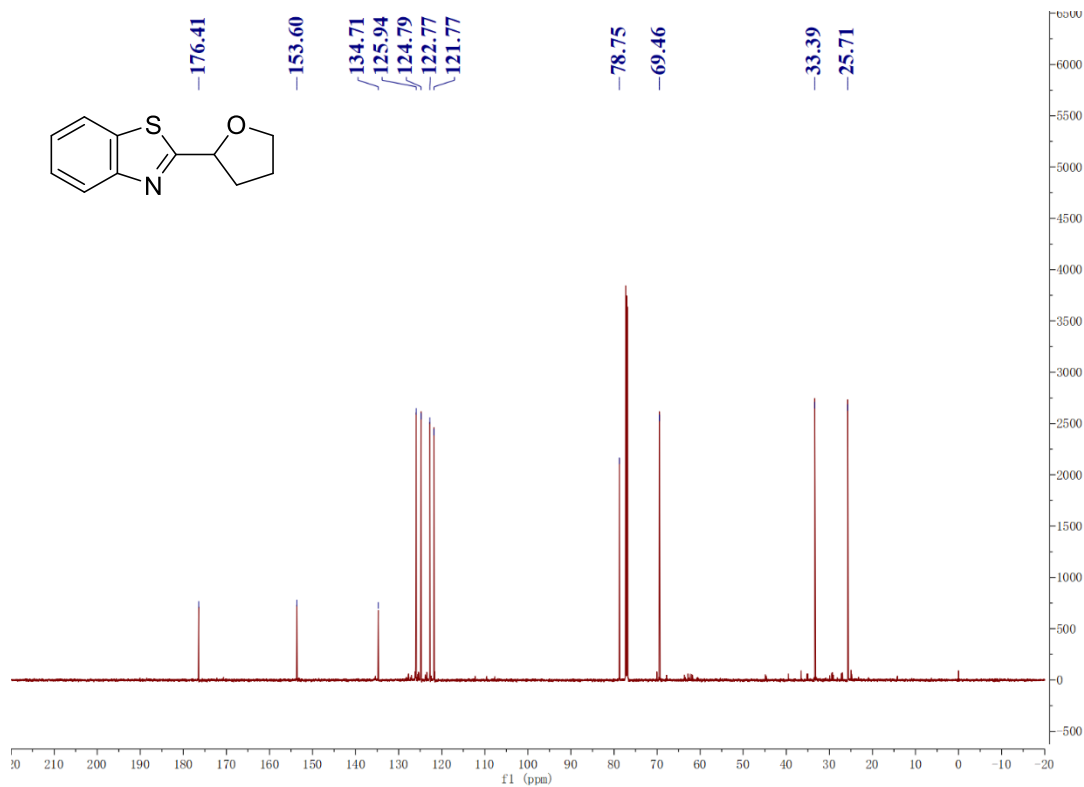

### <sup>1</sup>H NMR (400 MHz, CDCl<sub>3</sub>) of 6b

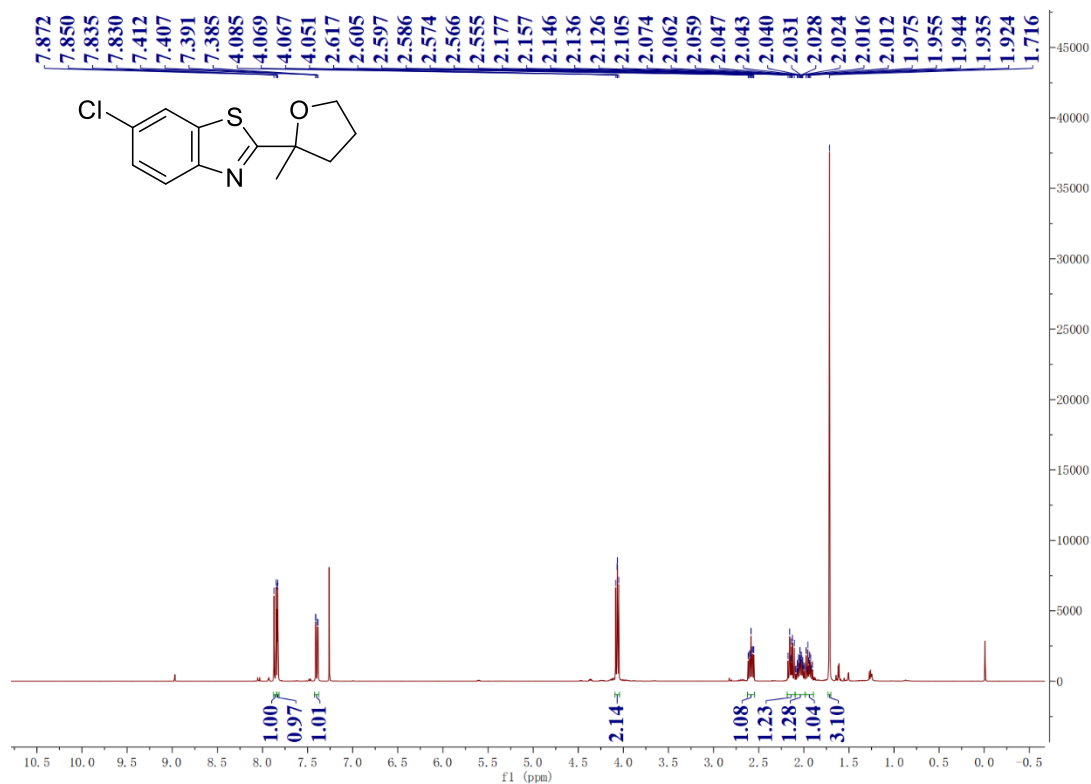

### <sup>13</sup>C NMR (101 MHz, CDCl<sub>3</sub>) of 6b

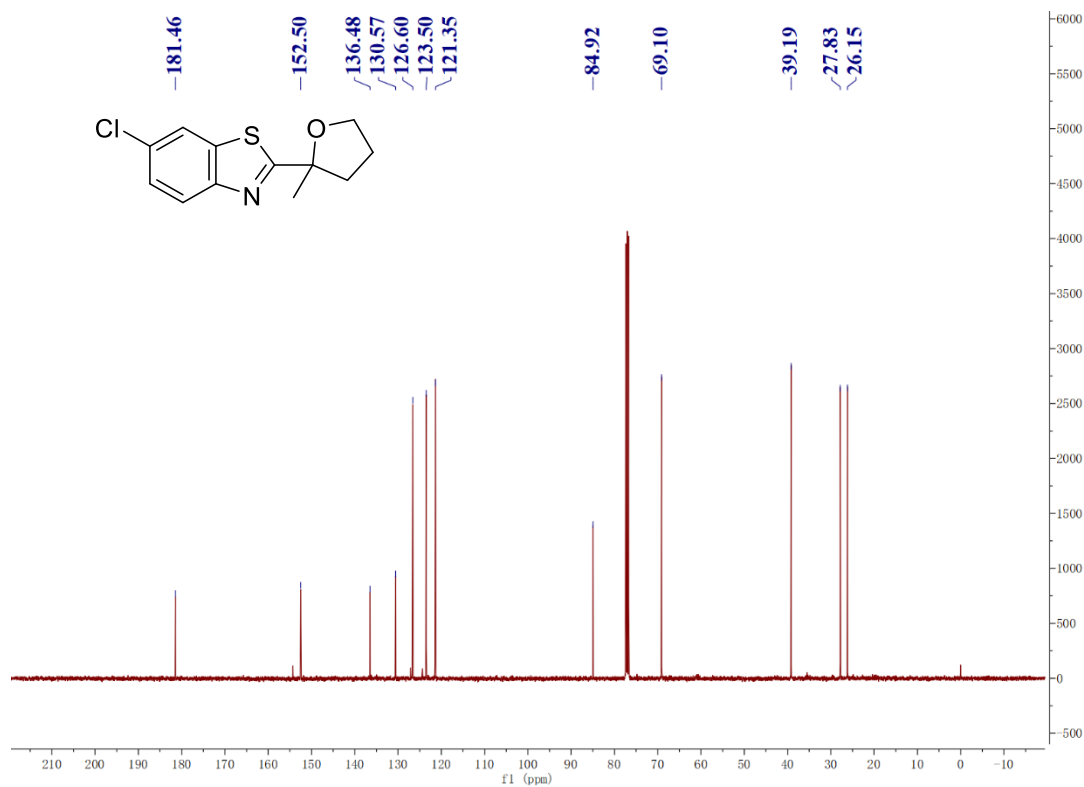

**<sup>1</sup>H NMR (600 MHz, CDCl<sub>3</sub>) of 6c**

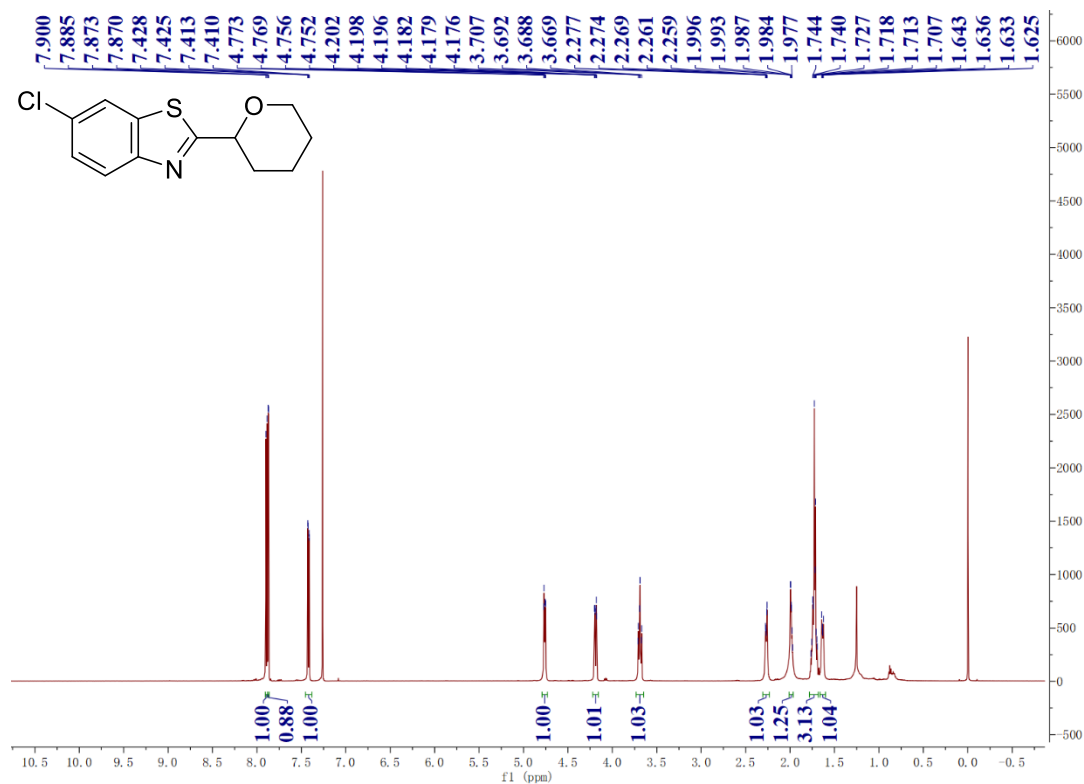

**<sup>13</sup>C NMR (151 MHz, CDCl<sub>3</sub>) of 6c**

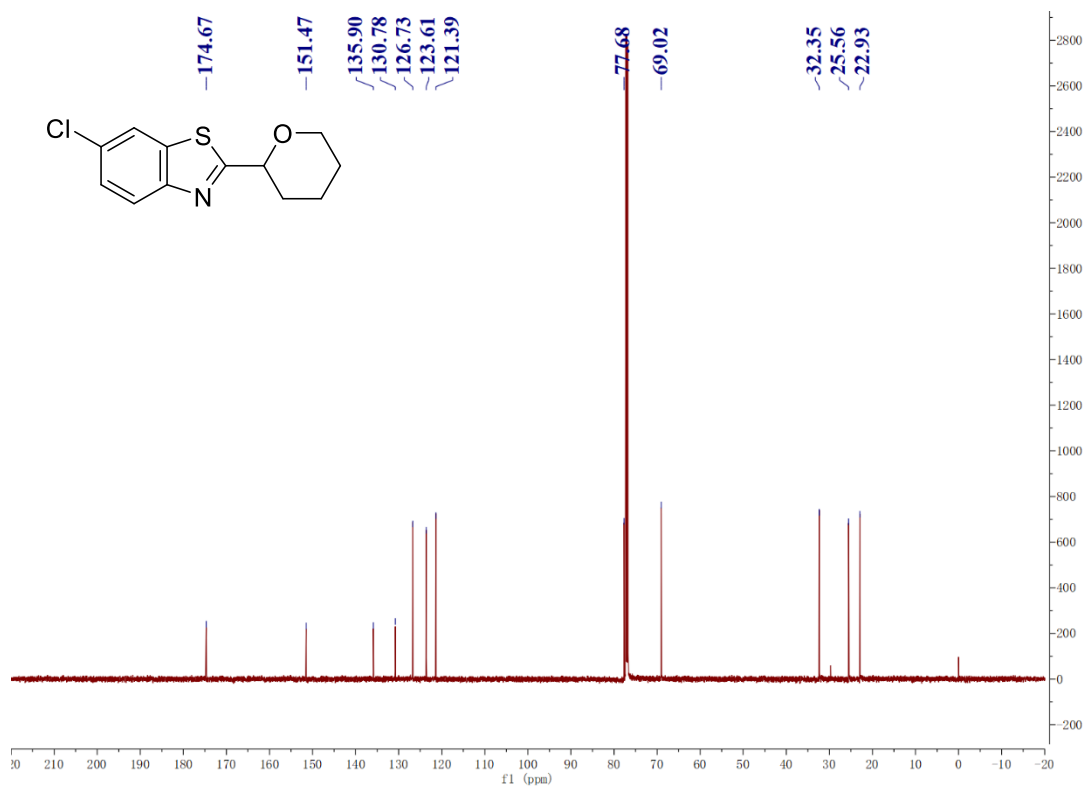



**<sup>1</sup>H NMR (600 MHz, CDCl<sub>3</sub>) of 6d**

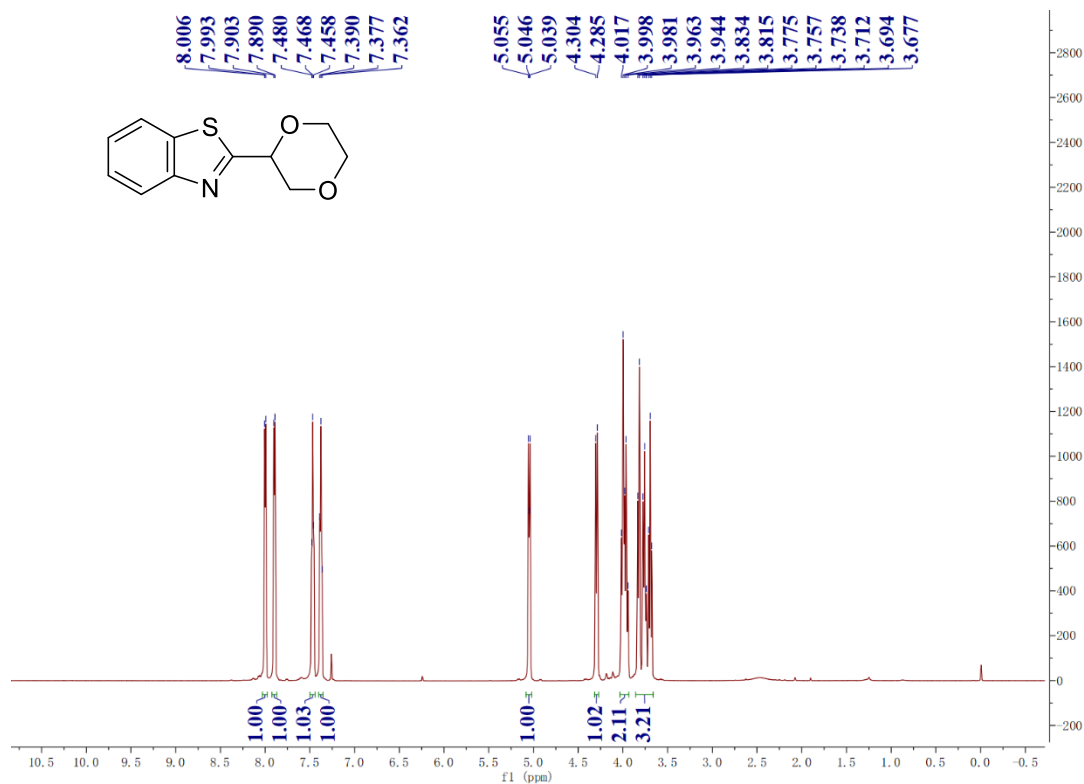

**<sup>13</sup>C NMR (151 MHz, CDCl<sub>3</sub>) of 6d**

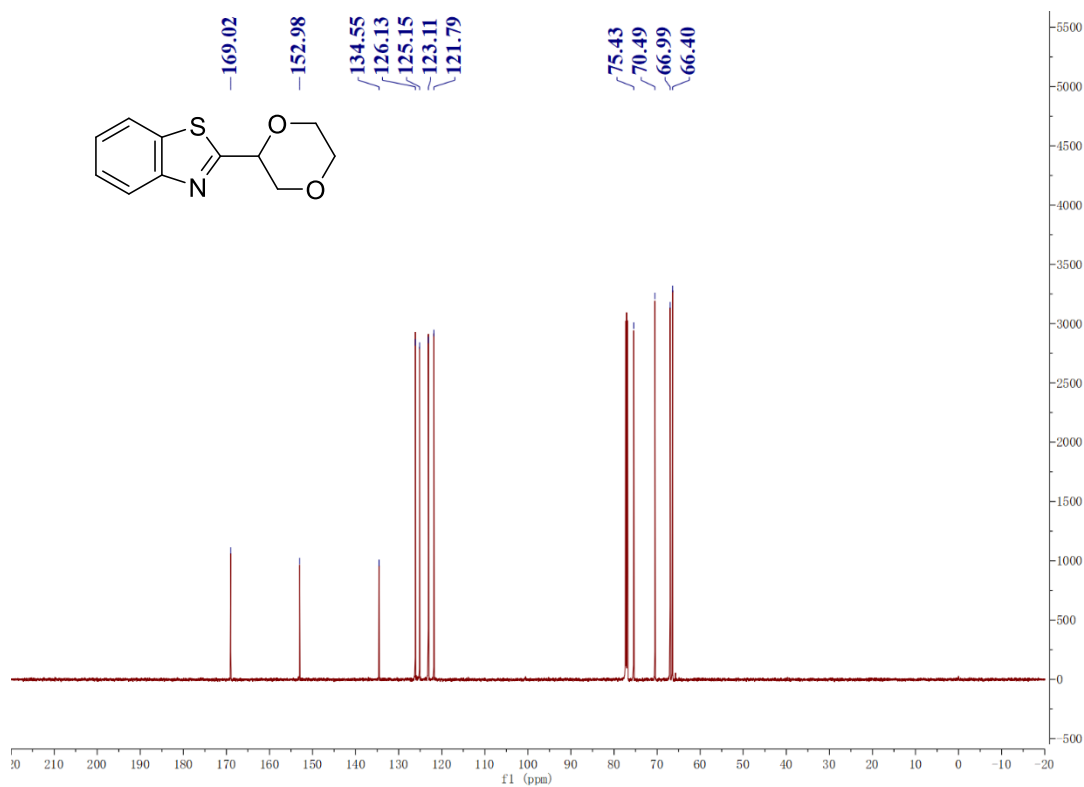

**<sup>1</sup>H NMR (400 MHz, CDCl<sub>3</sub>) of 6d'**

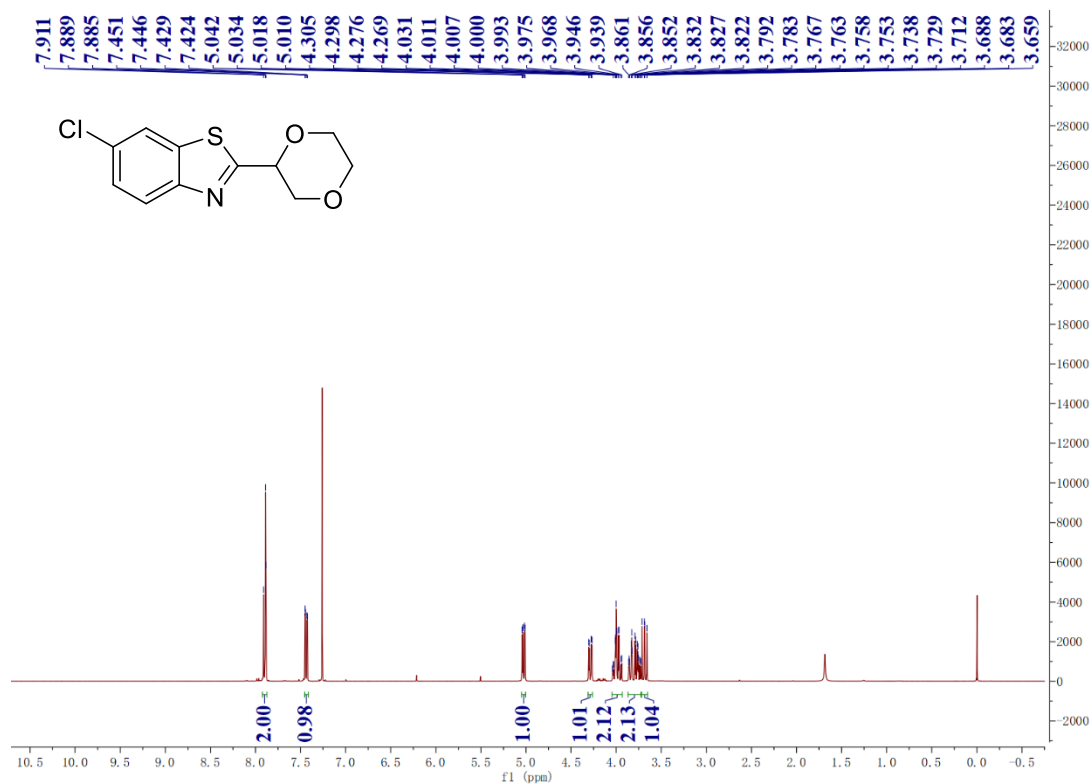

**<sup>13</sup>C NMR (101 MHz, CDCl<sub>3</sub>) of 6d'**

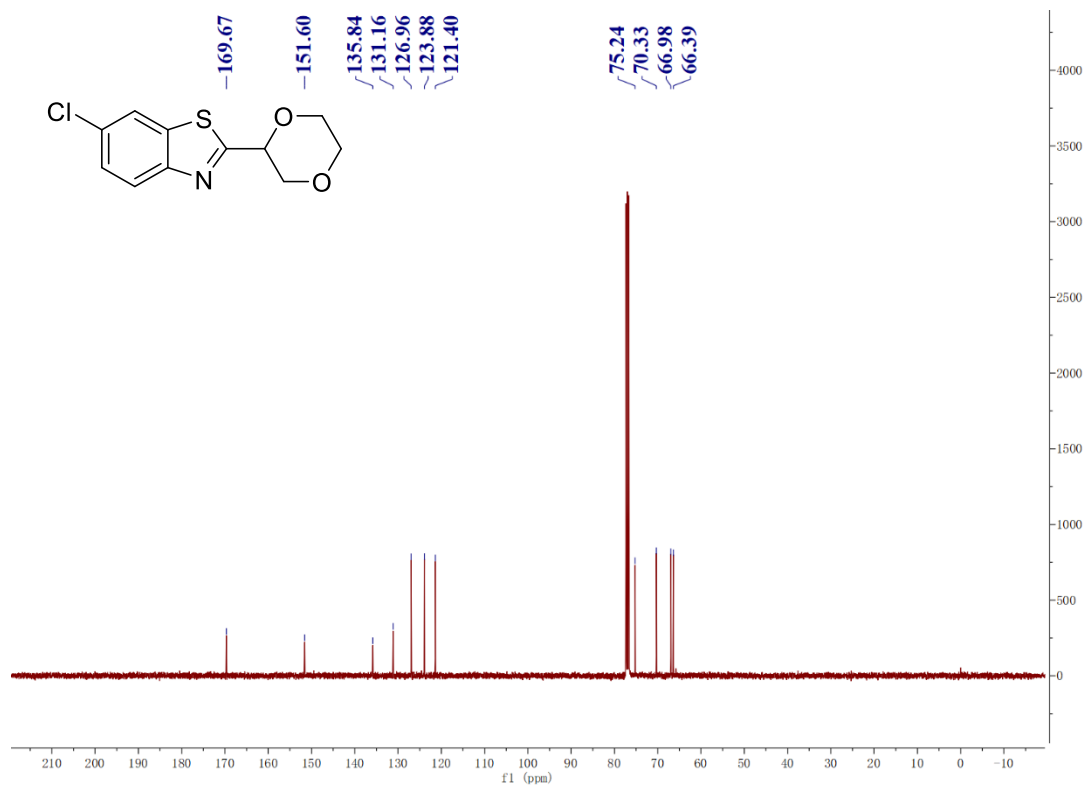

**<sup>1</sup>H NMR (600 MHz, CDCl<sub>3</sub>) of 6e**

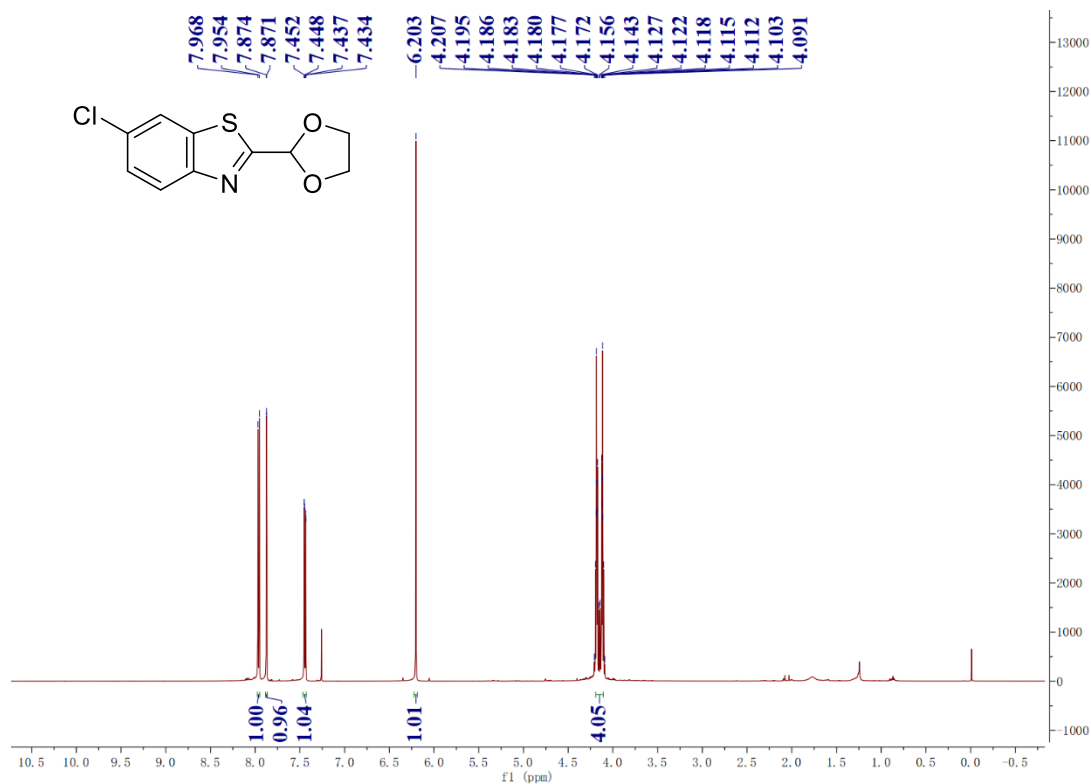

**<sup>13</sup>C NMR (151 MHz, CDCl<sub>3</sub>) of 6e**

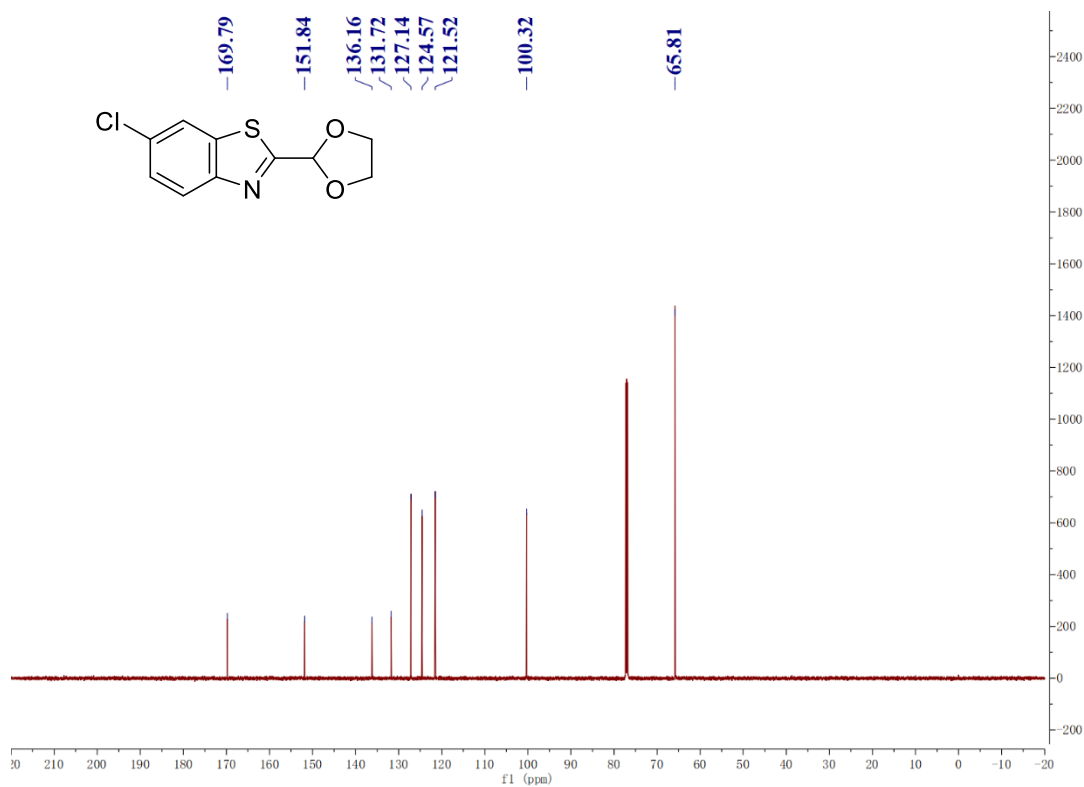

**<sup>1</sup>H NMR (400 MHz, CDCl<sub>3</sub>) of 6f**

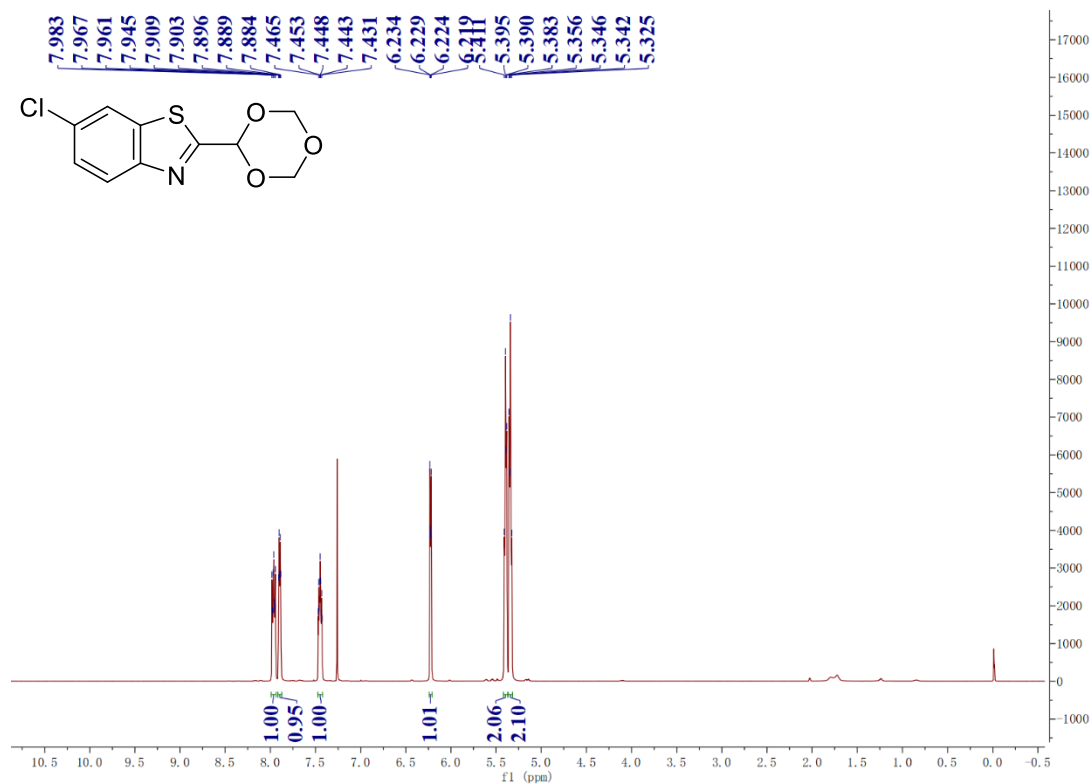

**<sup>13</sup>C NMR (151 MHz, CDCl<sub>3</sub>) of 6f**

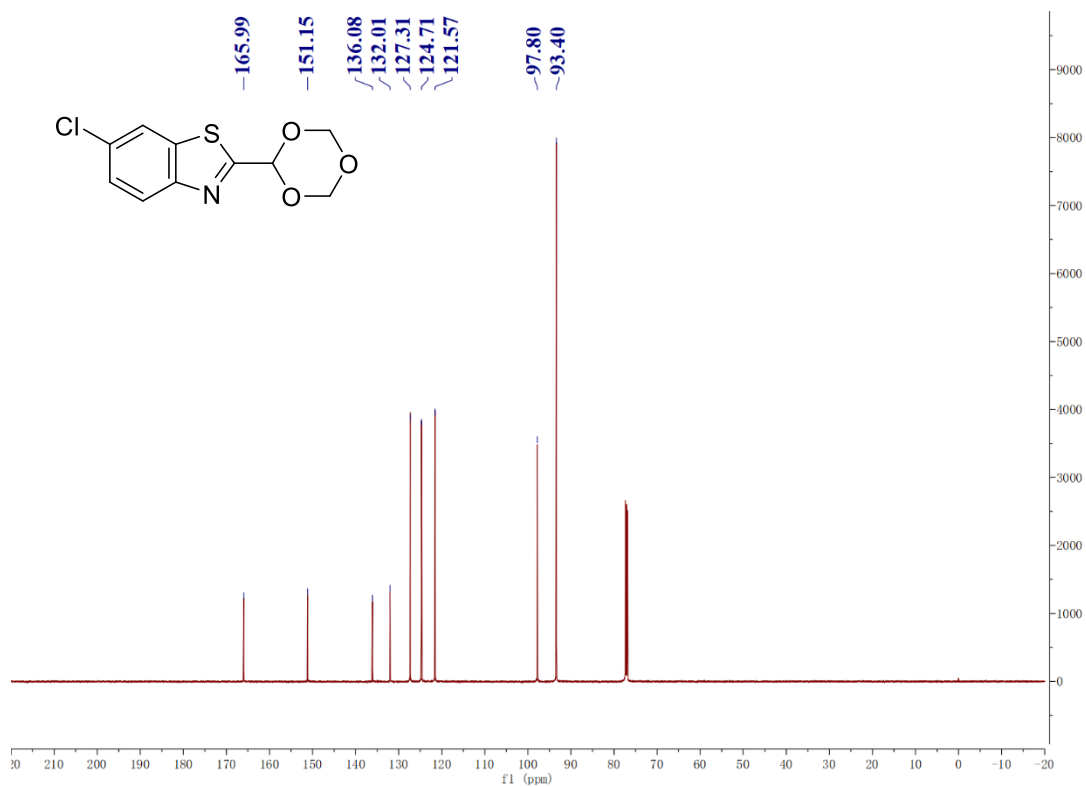

**<sup>1</sup>H NMR (600 MHz, CDCl<sub>3</sub>) of 6g**

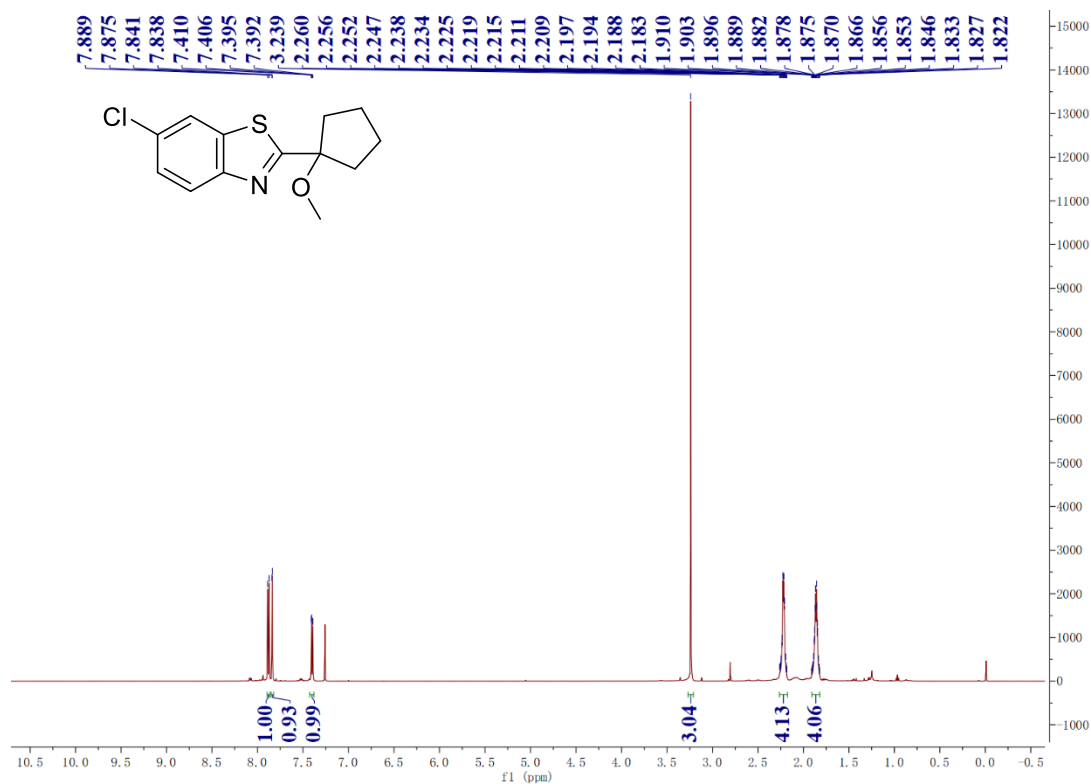

**<sup>13</sup>C NMR (151 MHz, CDCl<sub>3</sub>) of 6g**

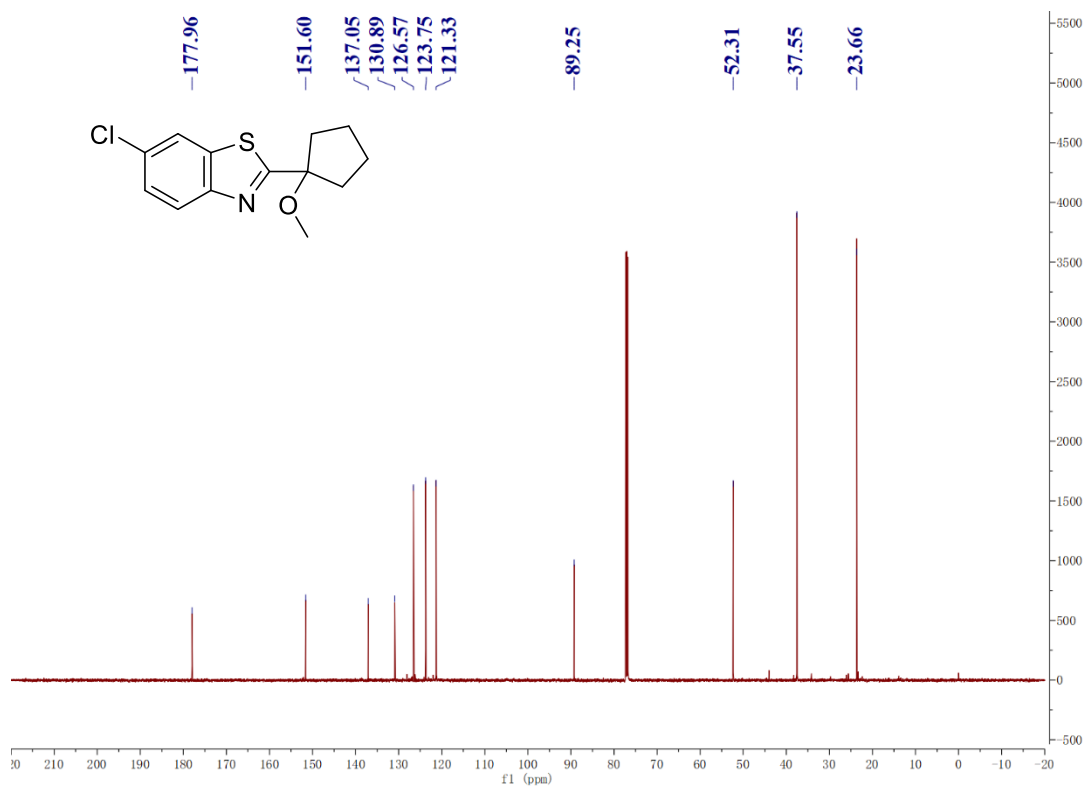

**<sup>1</sup>H NMR (600 MHz, CDCl<sub>3</sub>) of 6h**

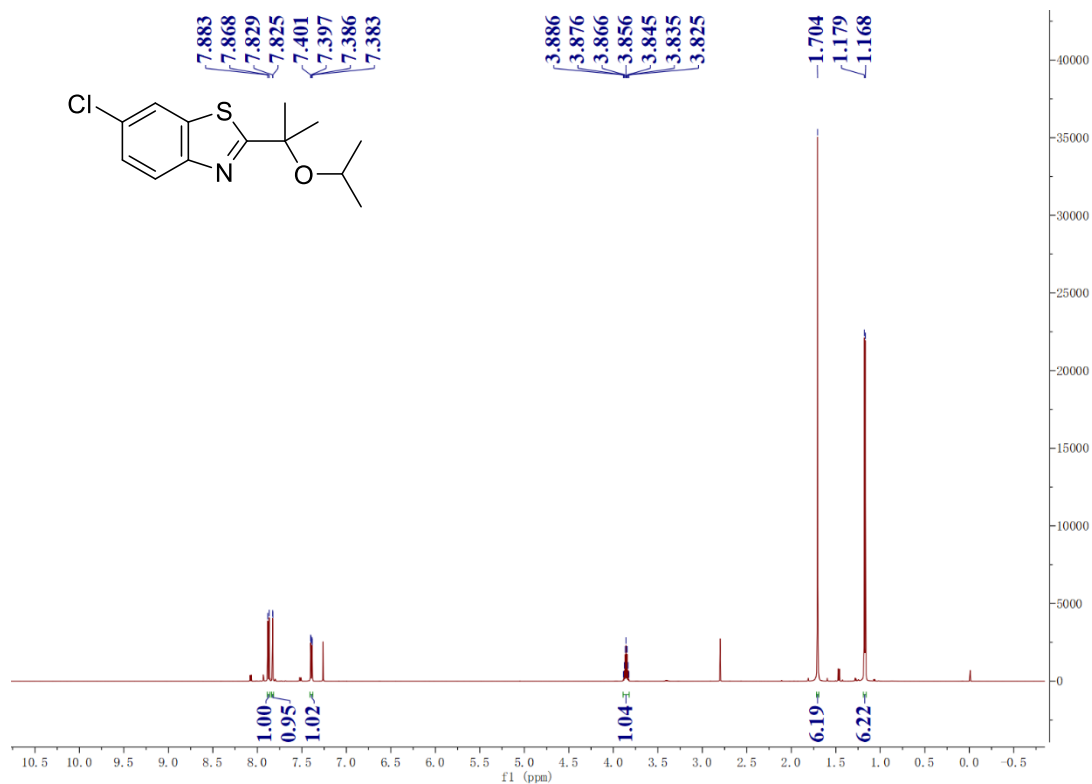

**<sup>13</sup>C NMR (151 MHz, CDCl<sub>3</sub>) of 6h**

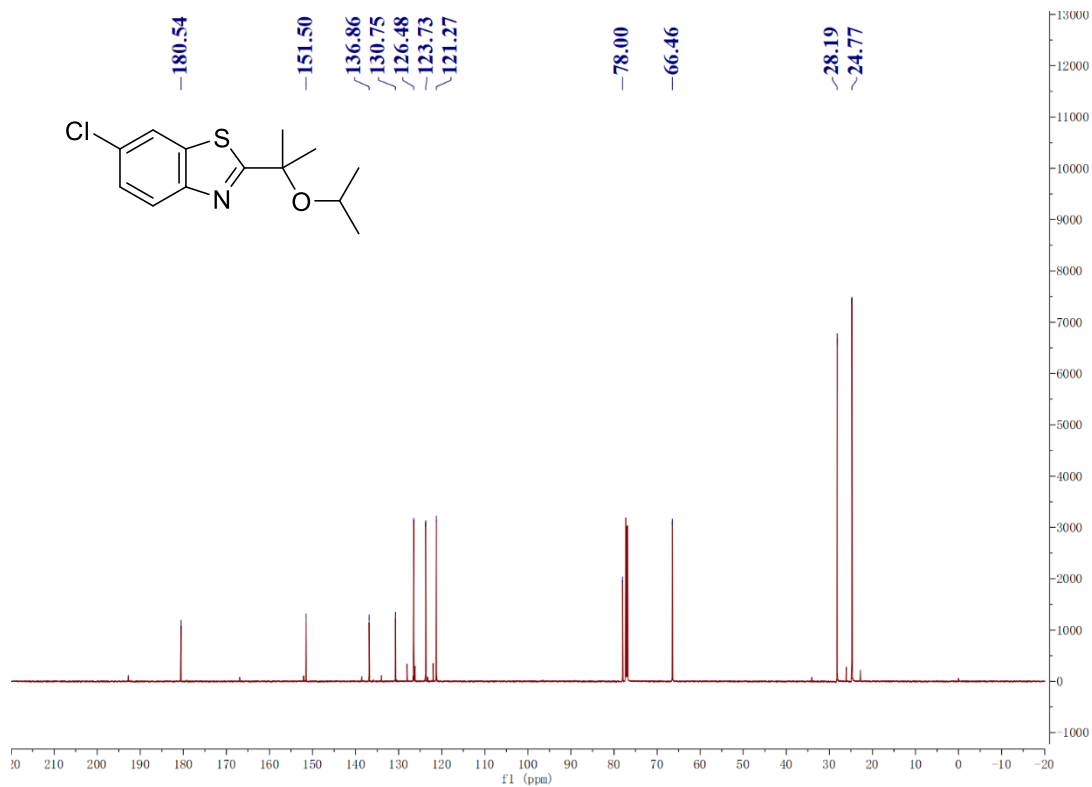

**<sup>1</sup>H NMR (400 MHz, CDCl<sub>3</sub>) of 8a**

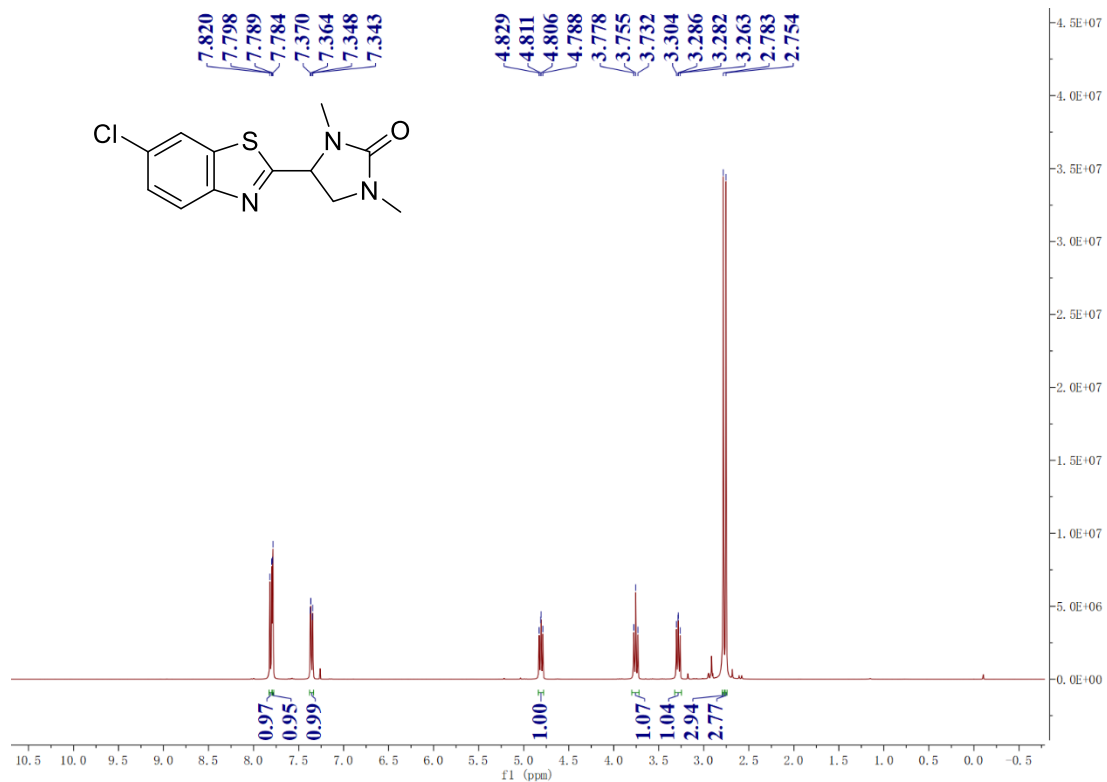

**<sup>13</sup>C NMR (101 MHz, CDCl<sub>3</sub>) of 8a**

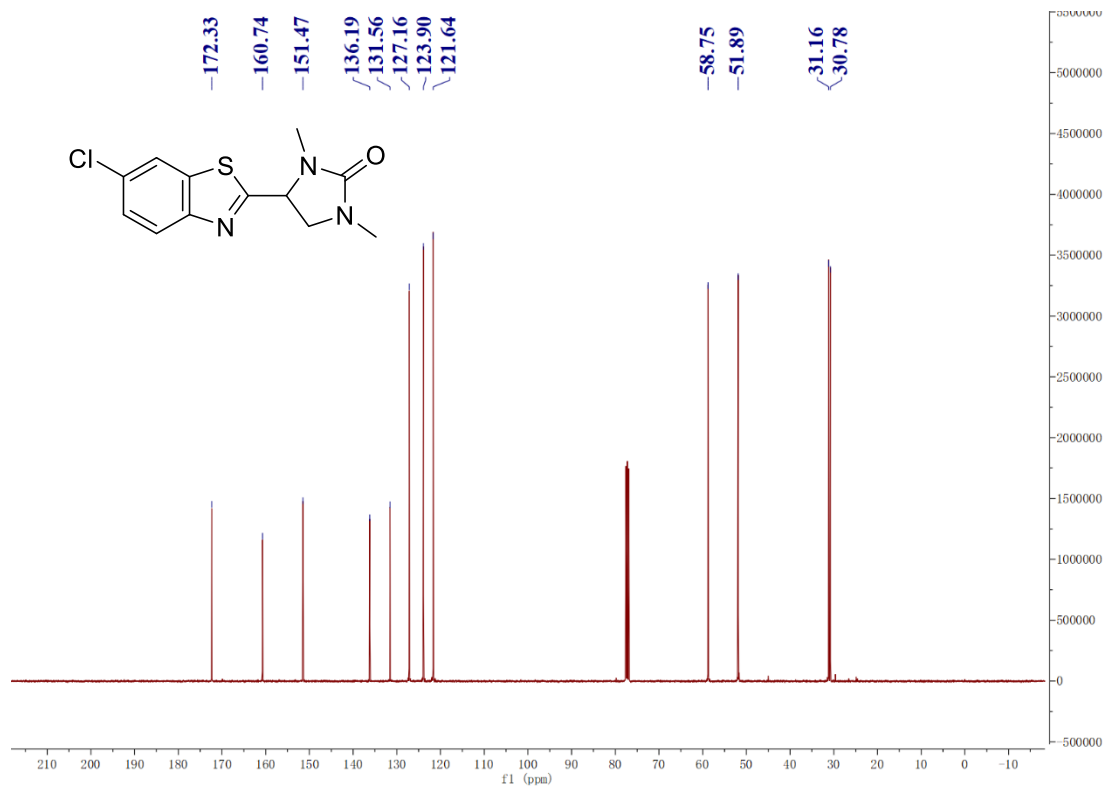

**<sup>1</sup>H NMR (400 MHz, CDCl<sub>3</sub>) of 8b**

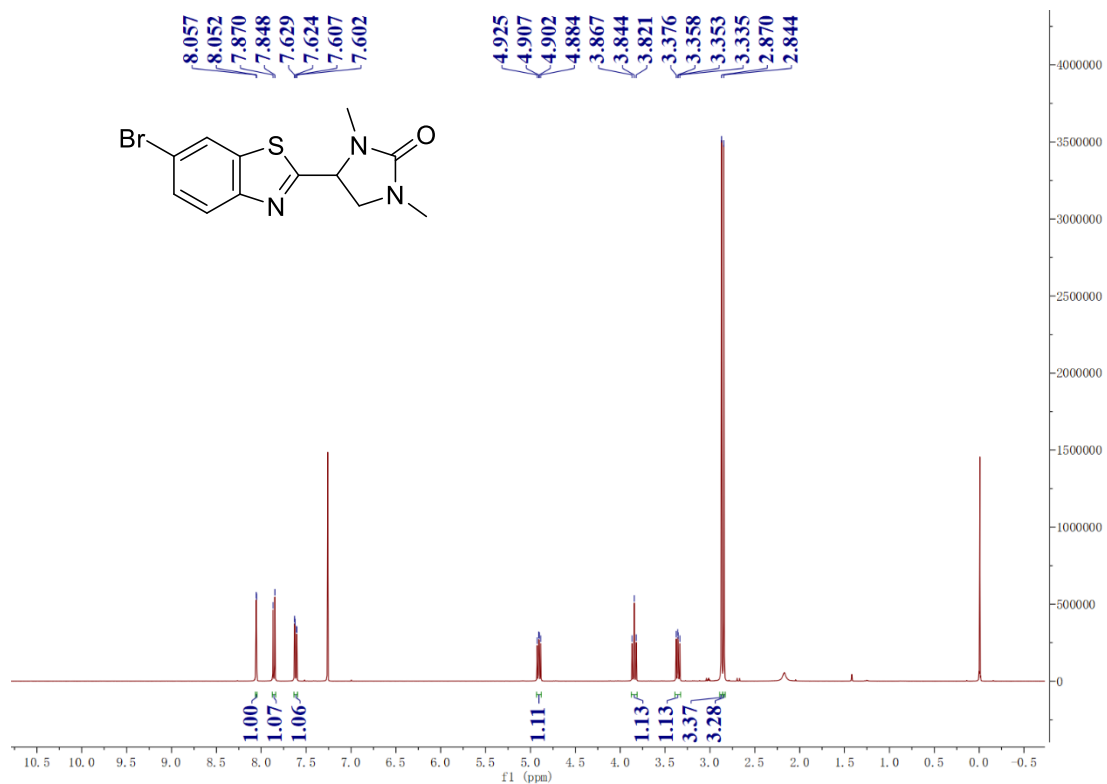

**<sup>13</sup>C NMR (101 MHz, CDCl<sub>3</sub>) of 8b**

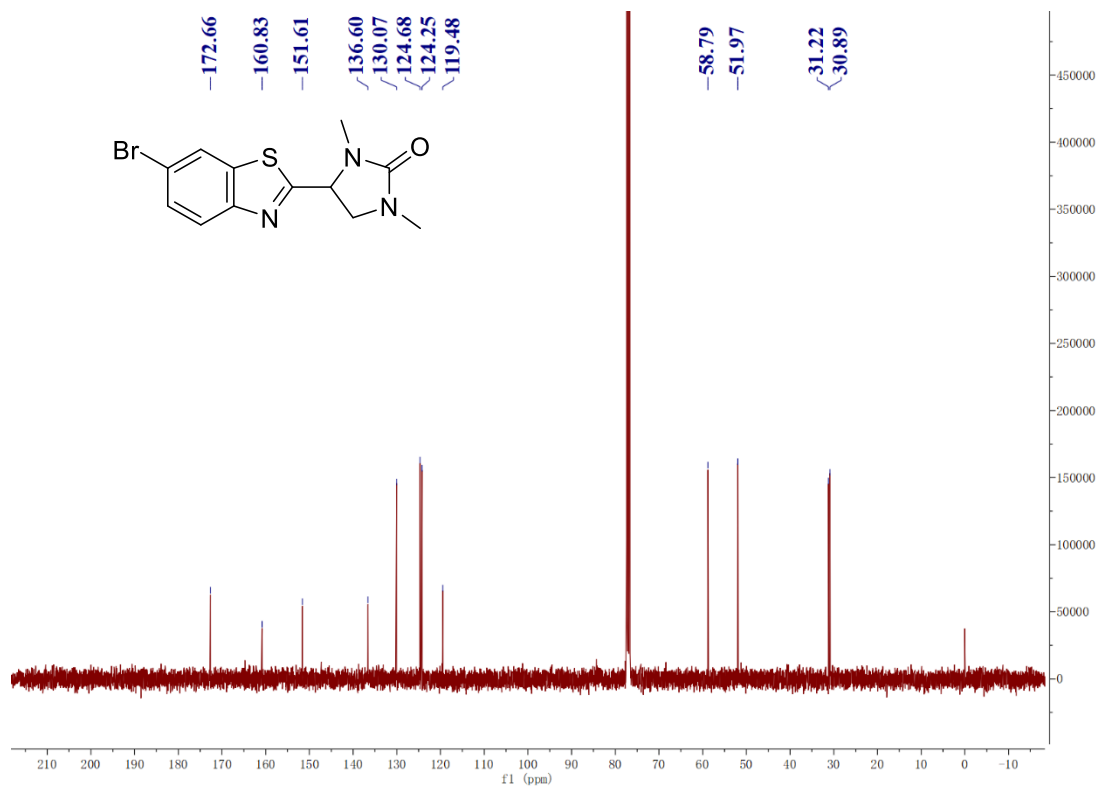



**<sup>1</sup>H NMR (600 MHz, CDCl<sub>3</sub>) of 8c**

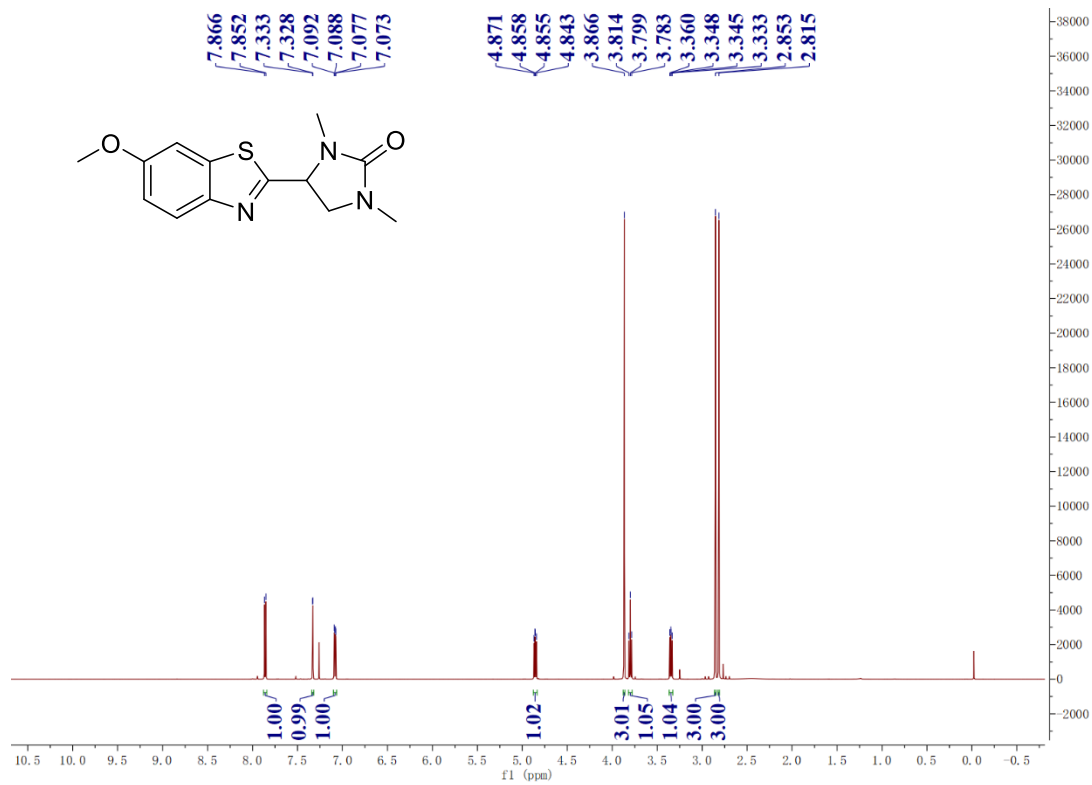

**<sup>13</sup>C NMR (151 MHz, CDCl<sub>3</sub>) of 8c**

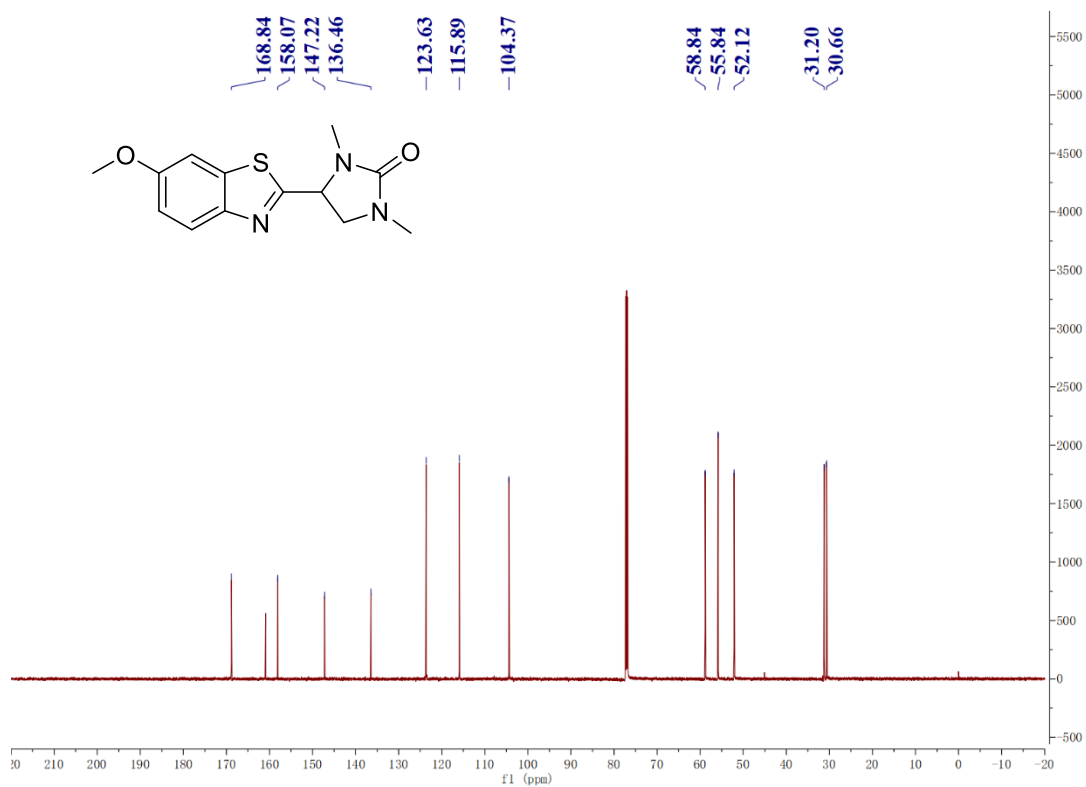

### $^1\text{H}$ NMR (600 MHz, $\text{CDCl}_3$ ) of 8d

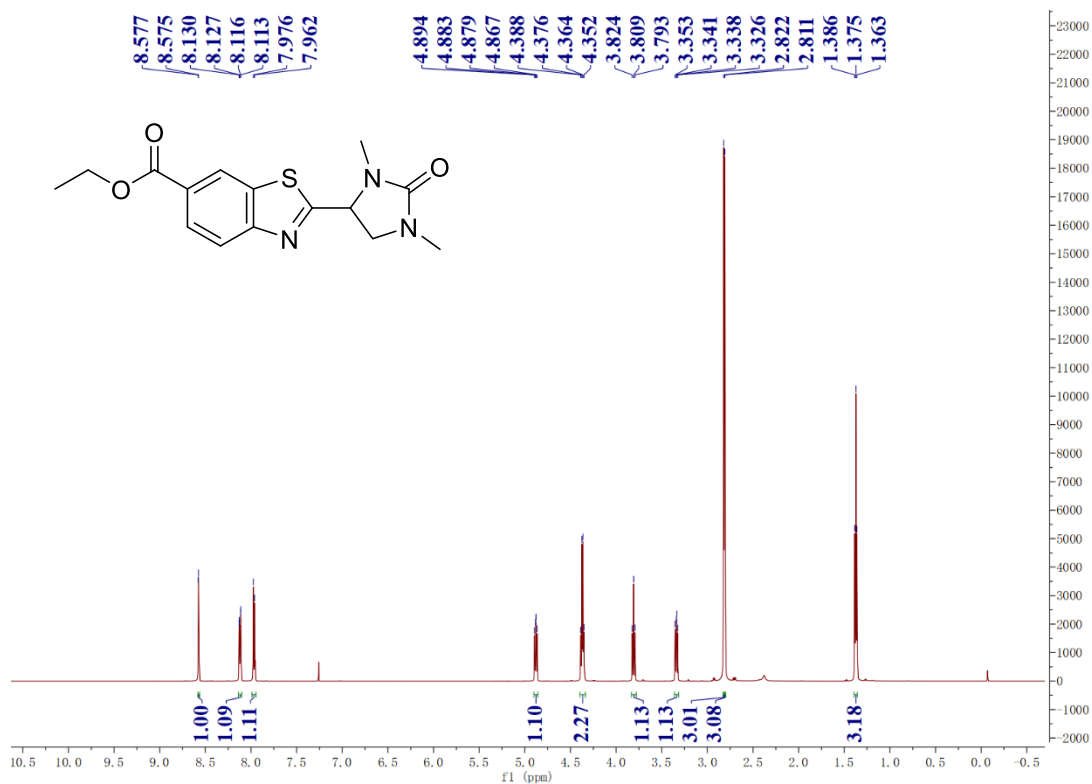

### $^{13}\text{C}$ NMR (151 MHz, $\text{CDCl}_3$ ) of 8d

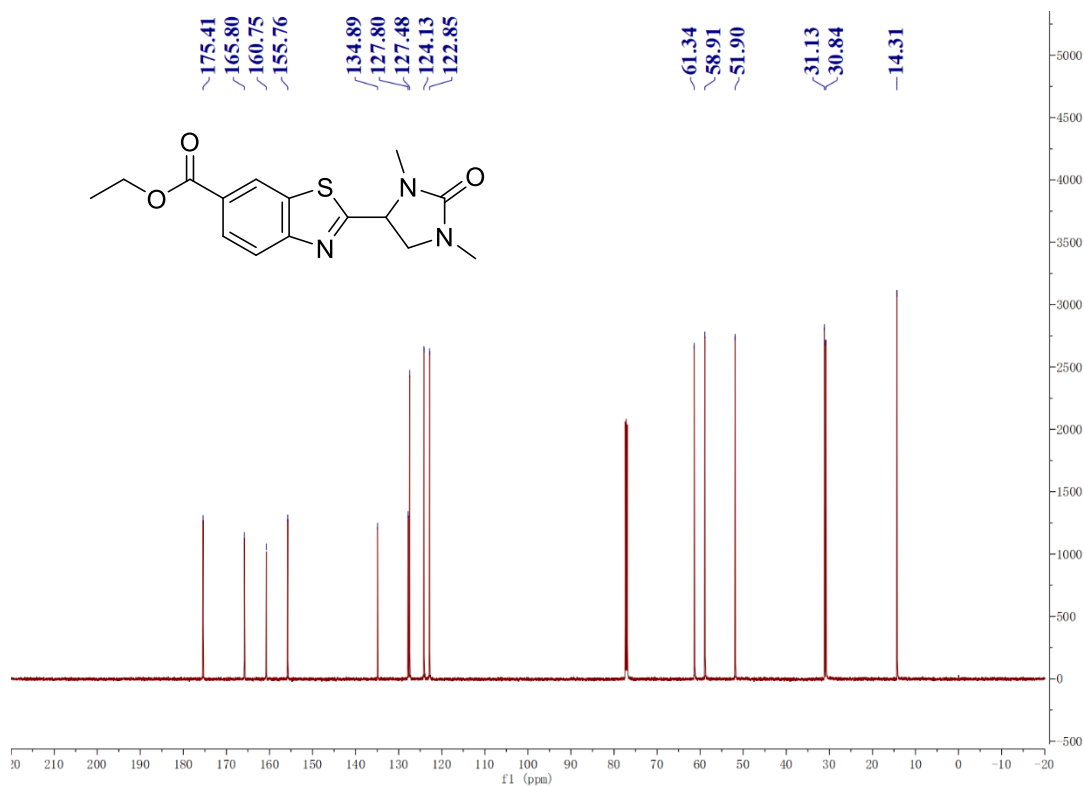

**<sup>1</sup>H NMR (600 MHz, CDCl<sub>3</sub>) of 8e**

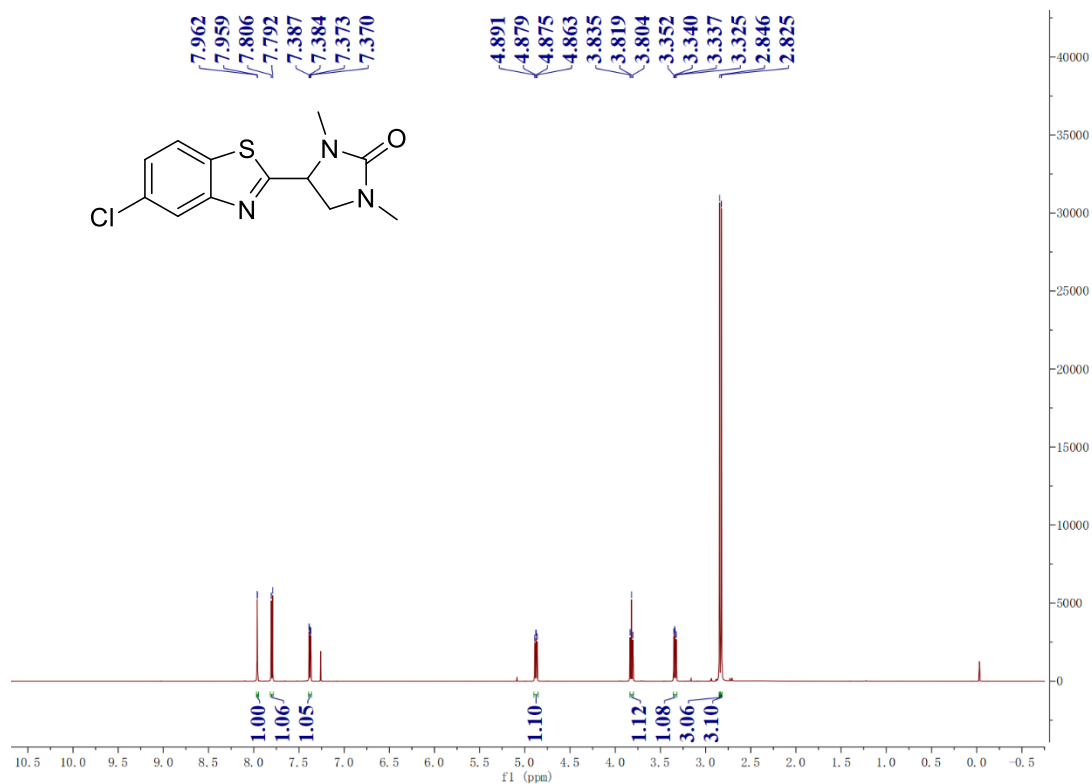

**<sup>13</sup>C NMR (151 MHz, CDCl<sub>3</sub>) of 8e**

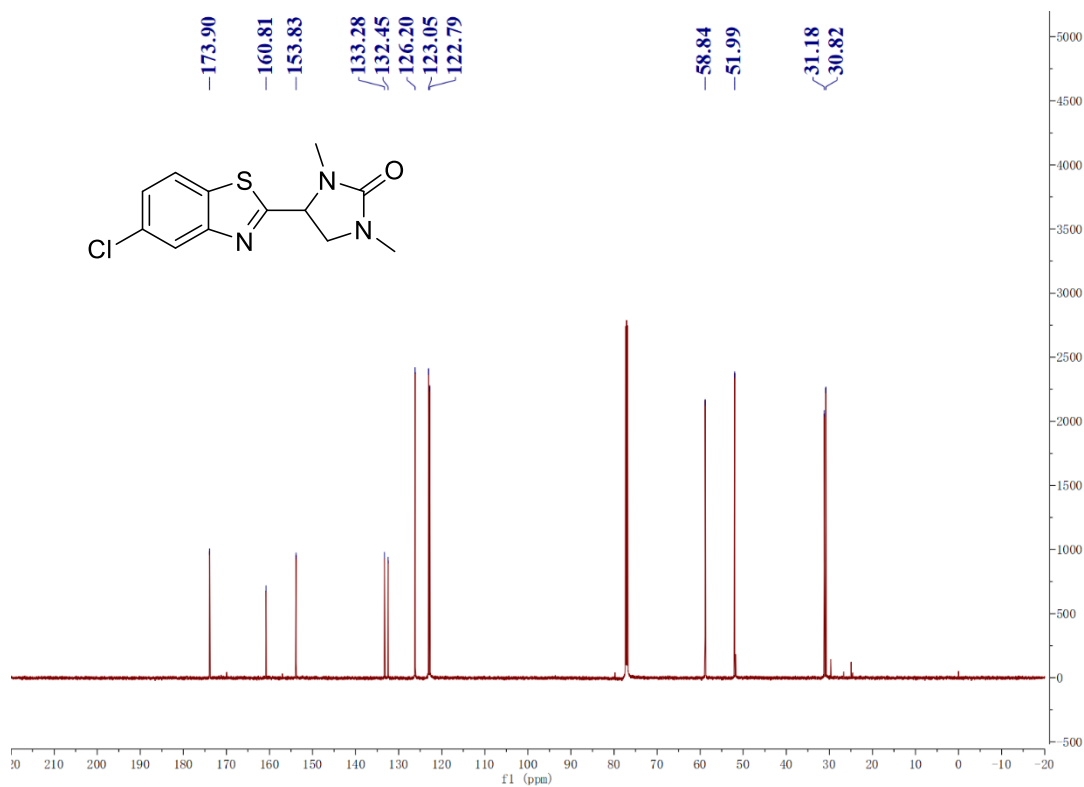

**<sup>1</sup>H NMR (600 MHz, CDCl<sub>3</sub>) of 8f**

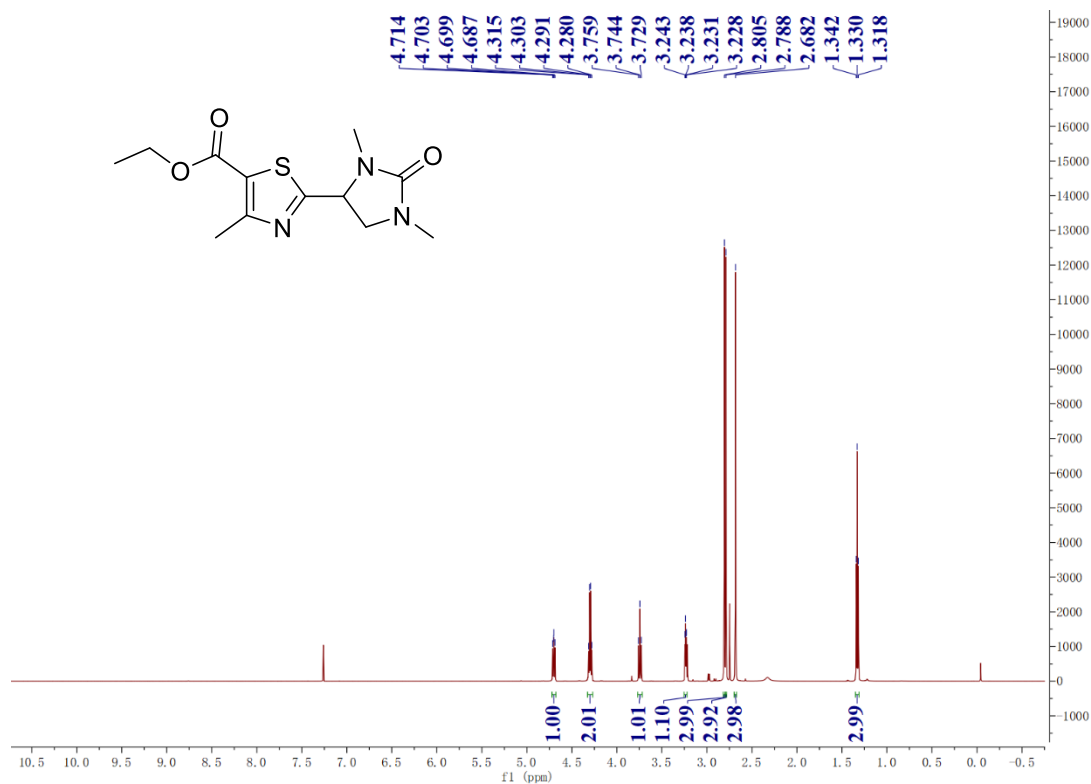

**<sup>13</sup>C NMR (151 MHz, CDCl<sub>3</sub>) of 8f**

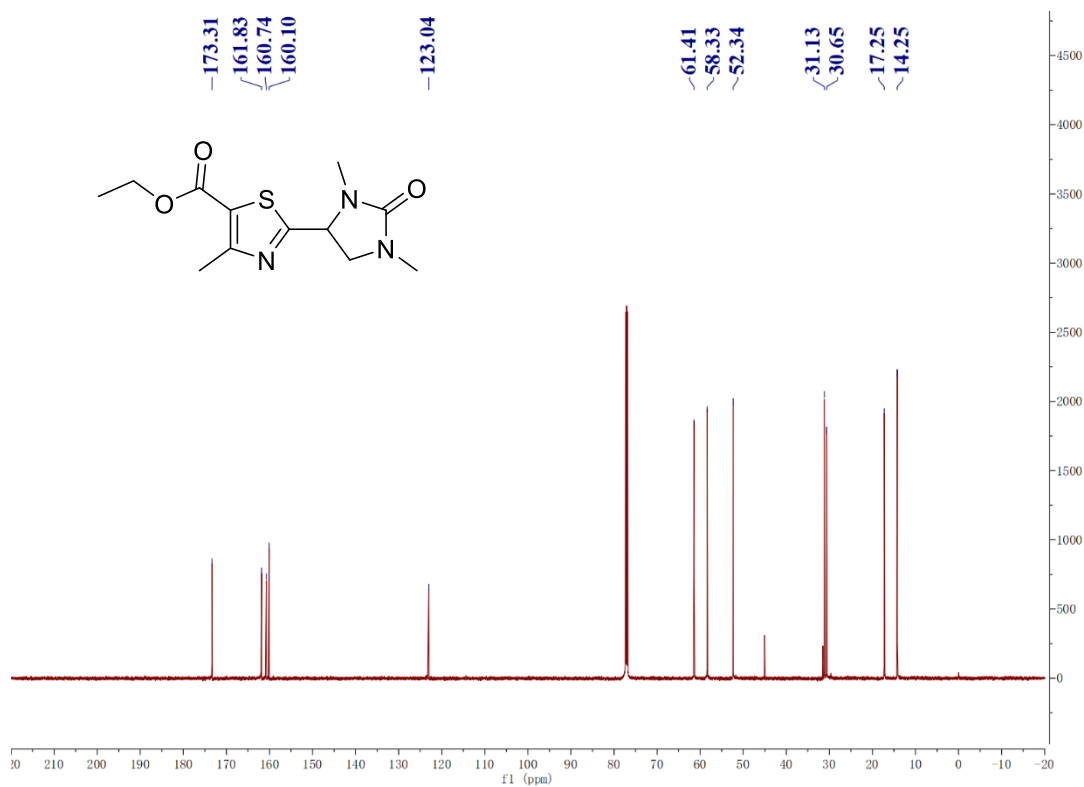

**<sup>1</sup>H NMR (600 MHz, CDCl<sub>3</sub>) of 8g**

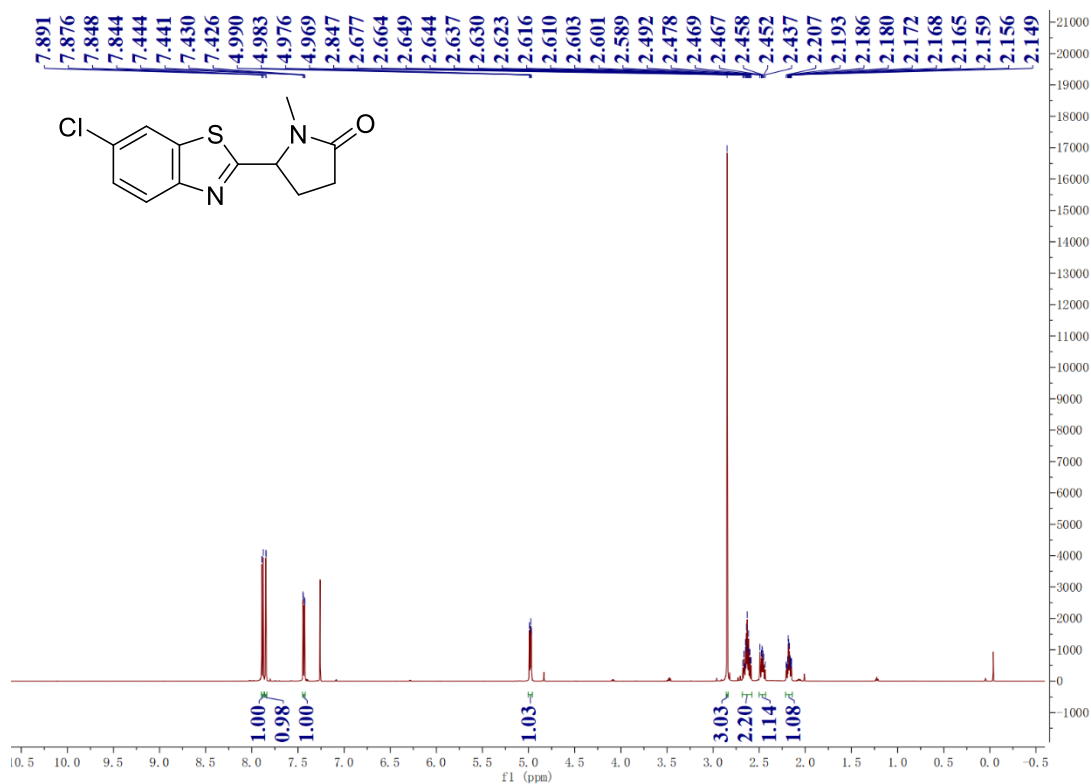

**<sup>13</sup>C NMR (151 MHz, CDCl<sub>3</sub>) of 8g**

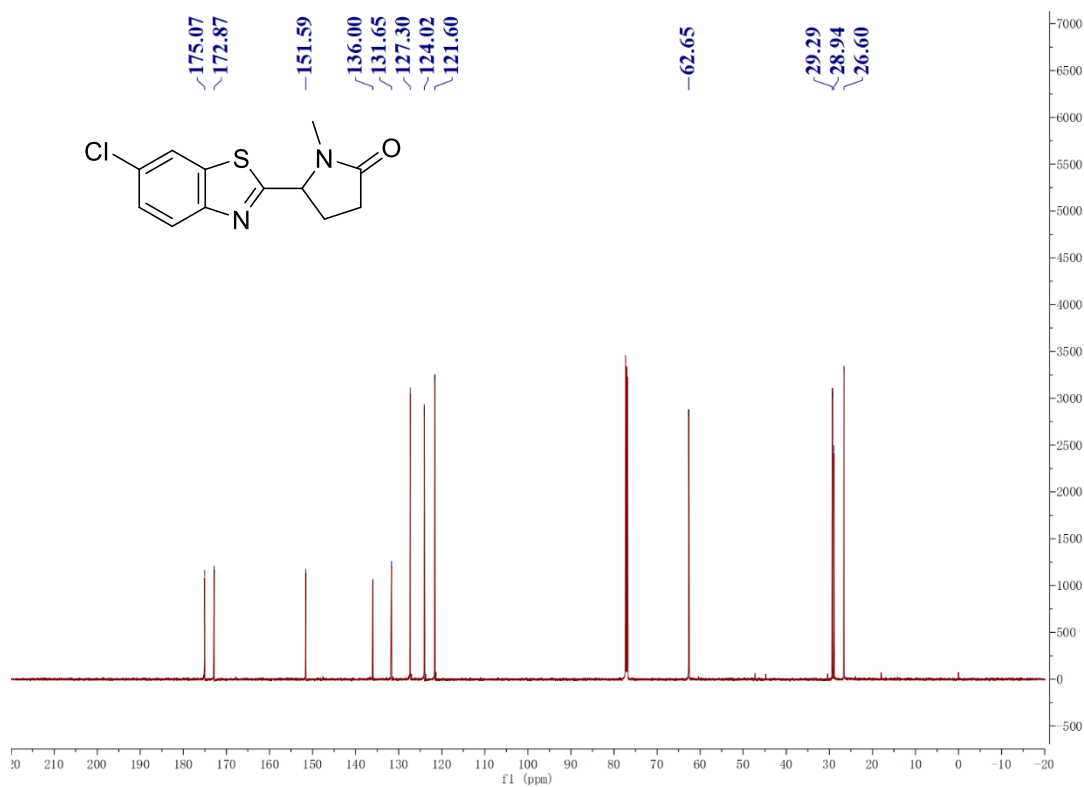

**<sup>1</sup>H NMR (600 MHz, CDCl<sub>3</sub>) of 8h**

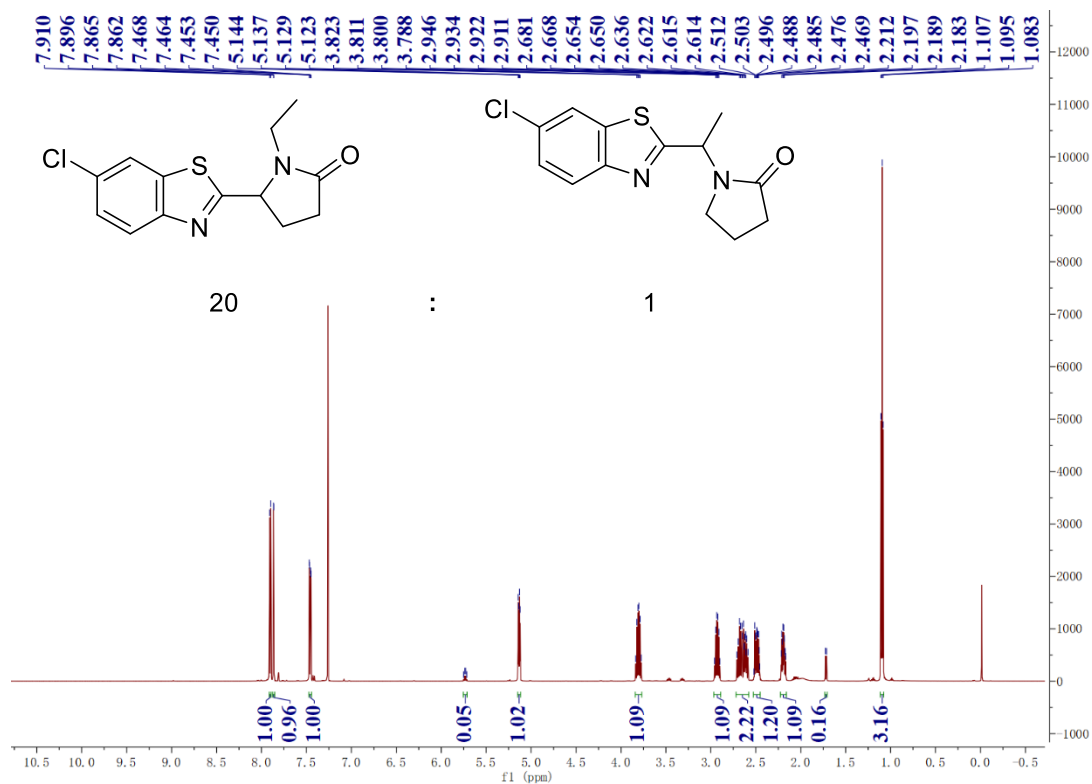

**<sup>13</sup>C NMR (151 MHz, CDCl<sub>3</sub>) of 8h**

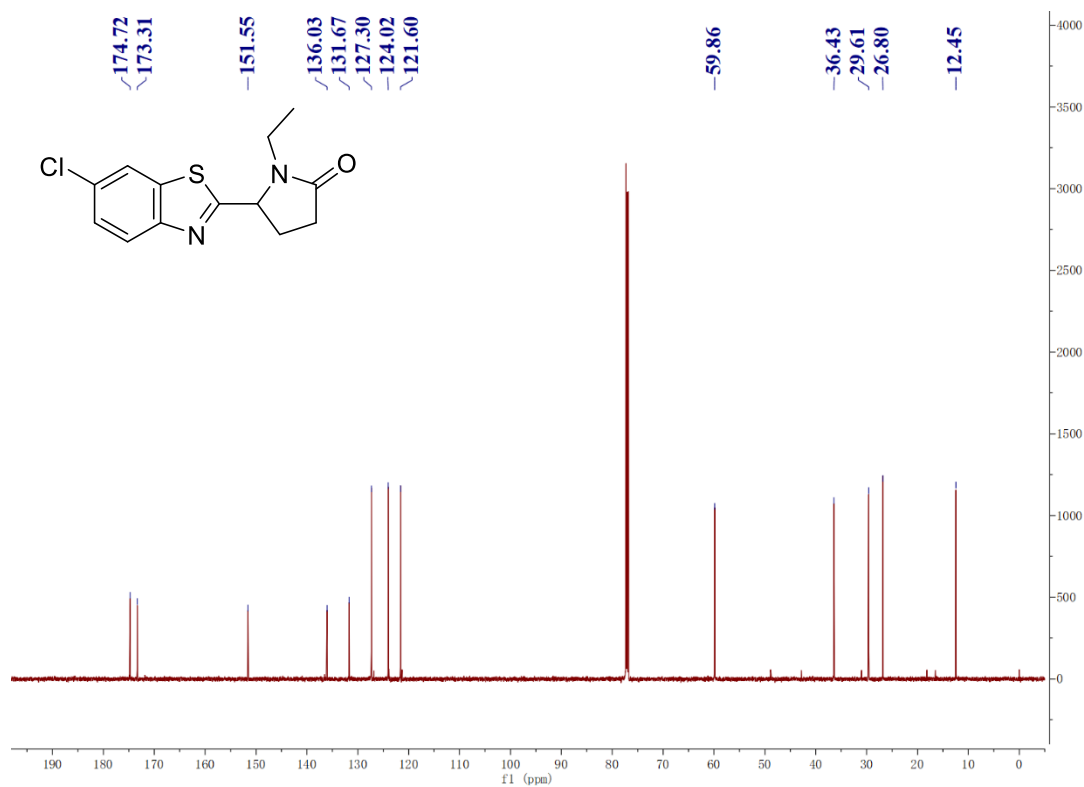

**<sup>1</sup>H NMR (600 MHz, DMSO-*d*<sub>6</sub>) of 8i**

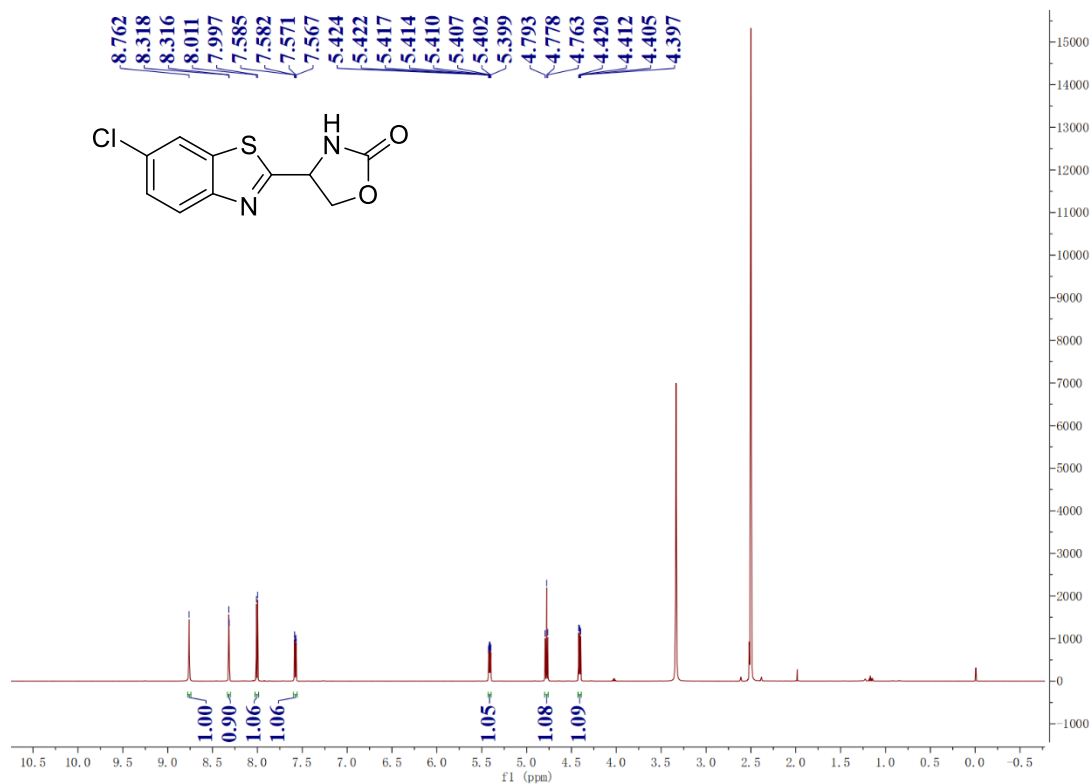

**<sup>13</sup>C NMR (151 MHz, DMSO-*d*<sub>6</sub>) of 8i**

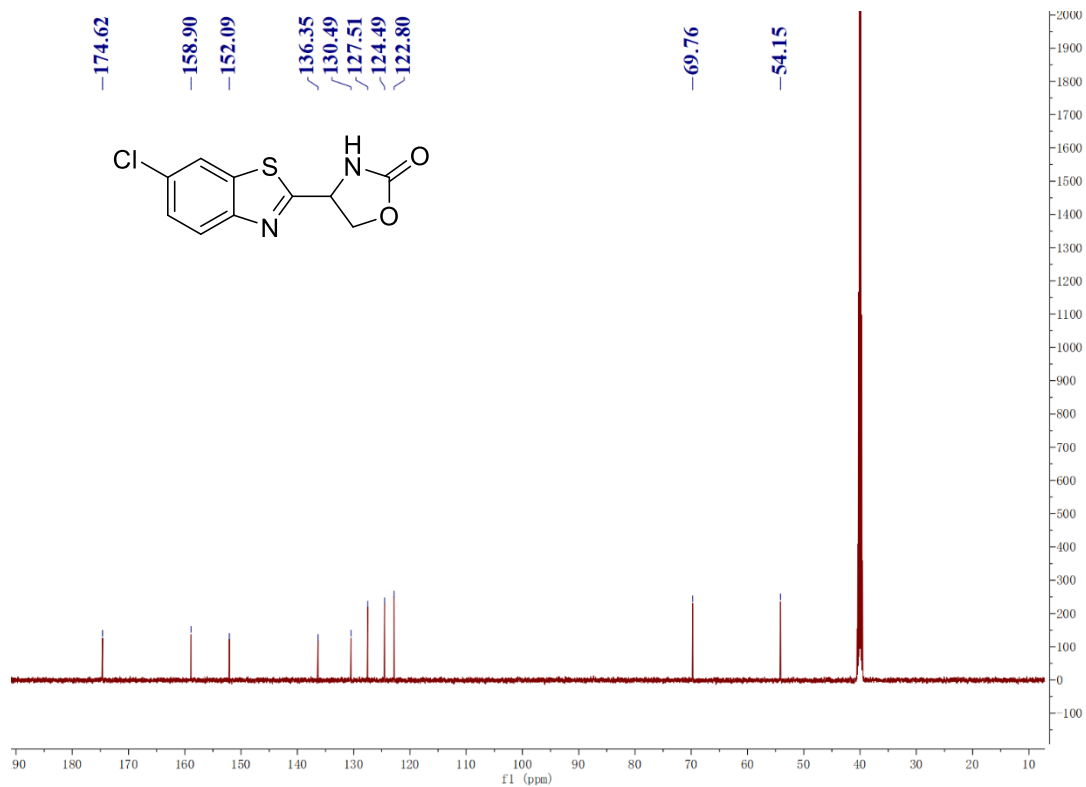

**<sup>1</sup>H NMR (600 MHz, DMSO-*d*<sub>6</sub>) of 8j**

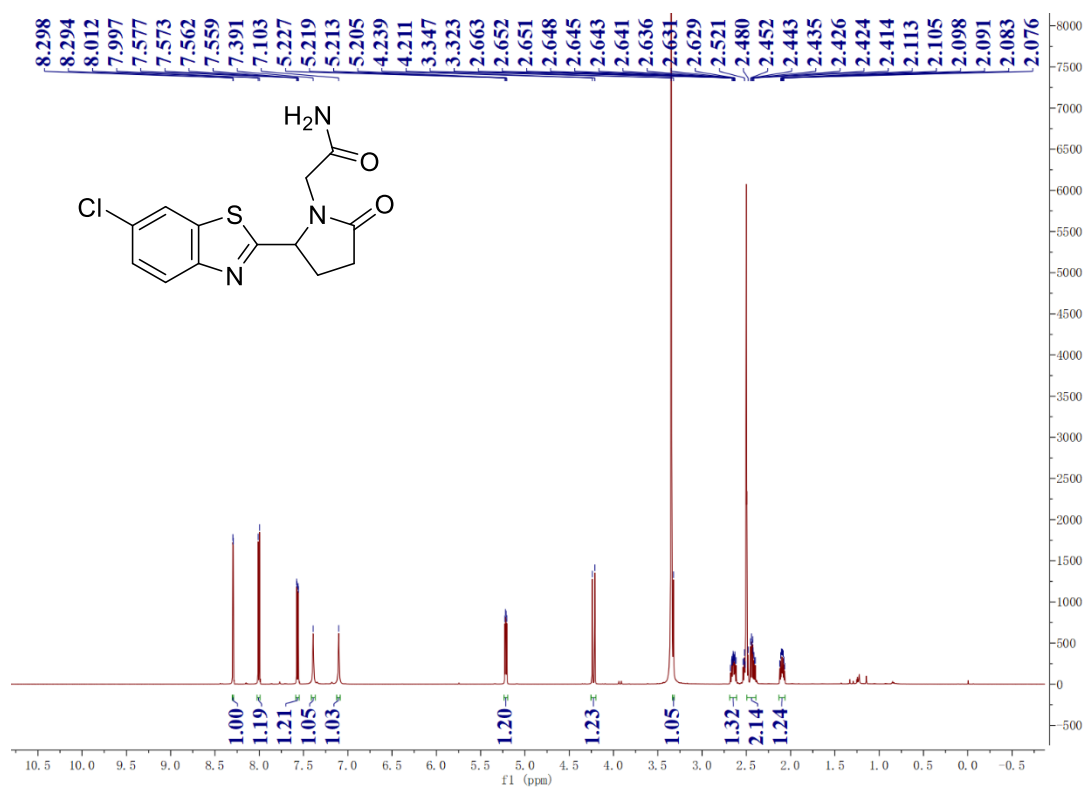

**<sup>13</sup>C NMR (151 MHz, DMSO-*d*<sub>6</sub>) of 8j**

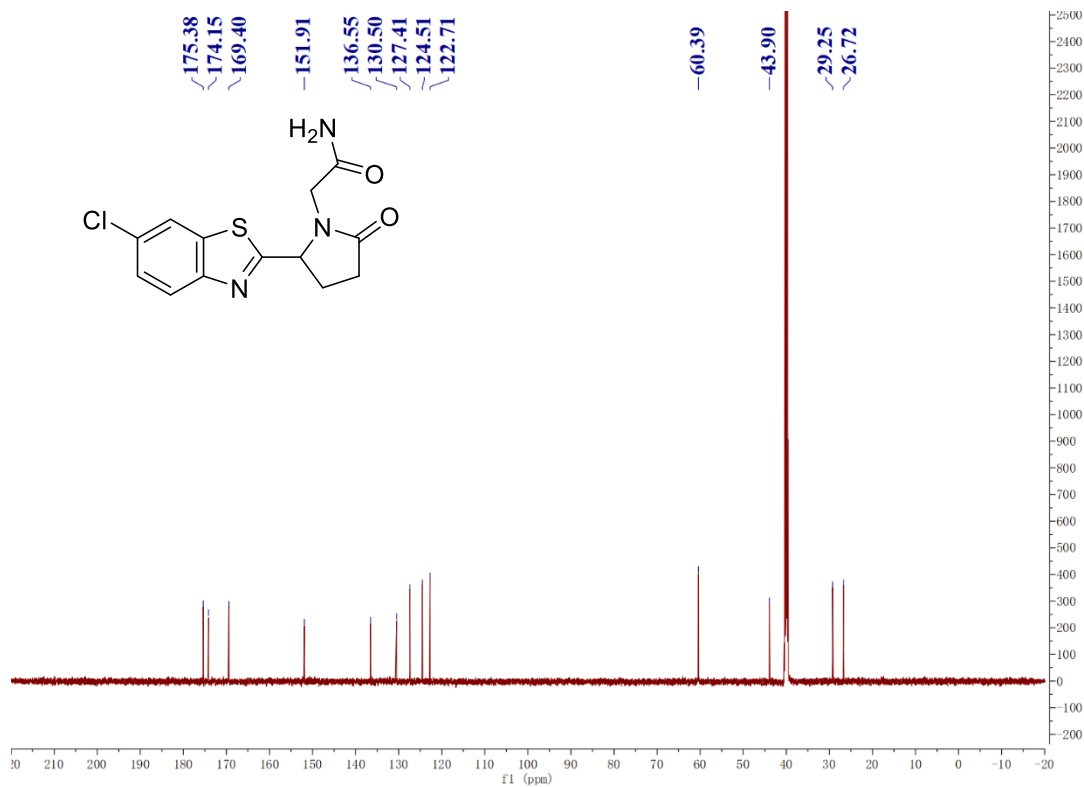



**<sup>1</sup>H NMR (600 MHz, CDCl<sub>3</sub>) of 8k and 8k'**

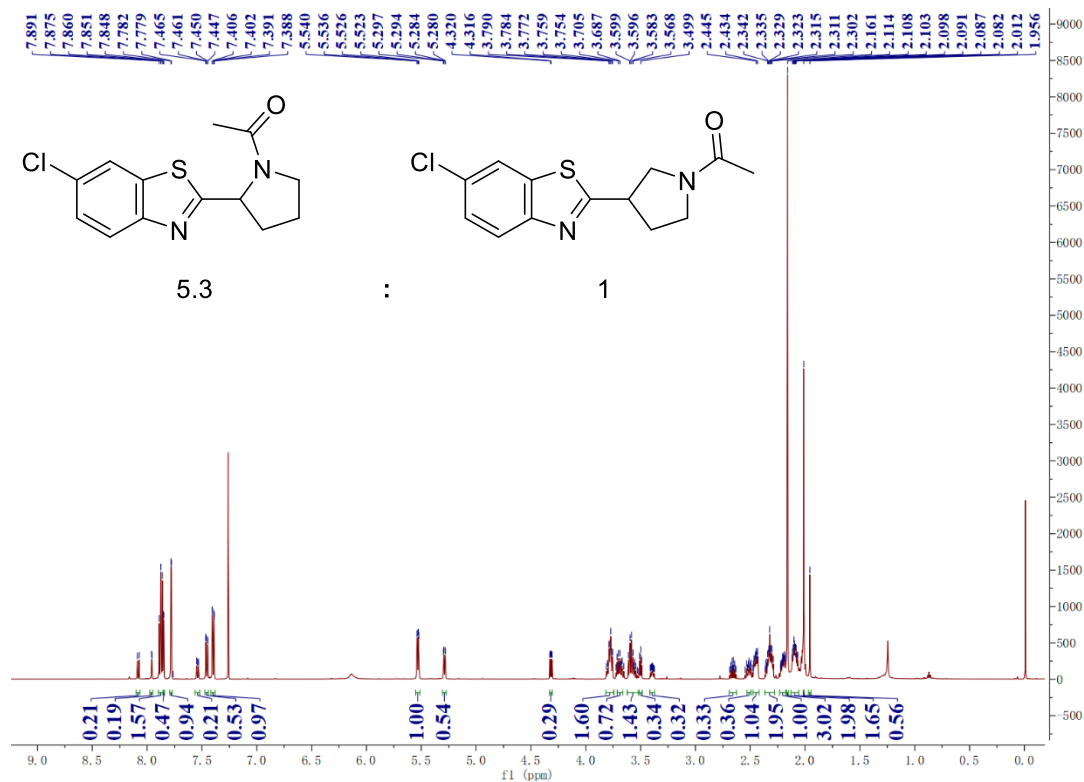

**<sup>13</sup>C NMR (151 MHz, CDCl<sub>3</sub>) of 8k and 8k'**

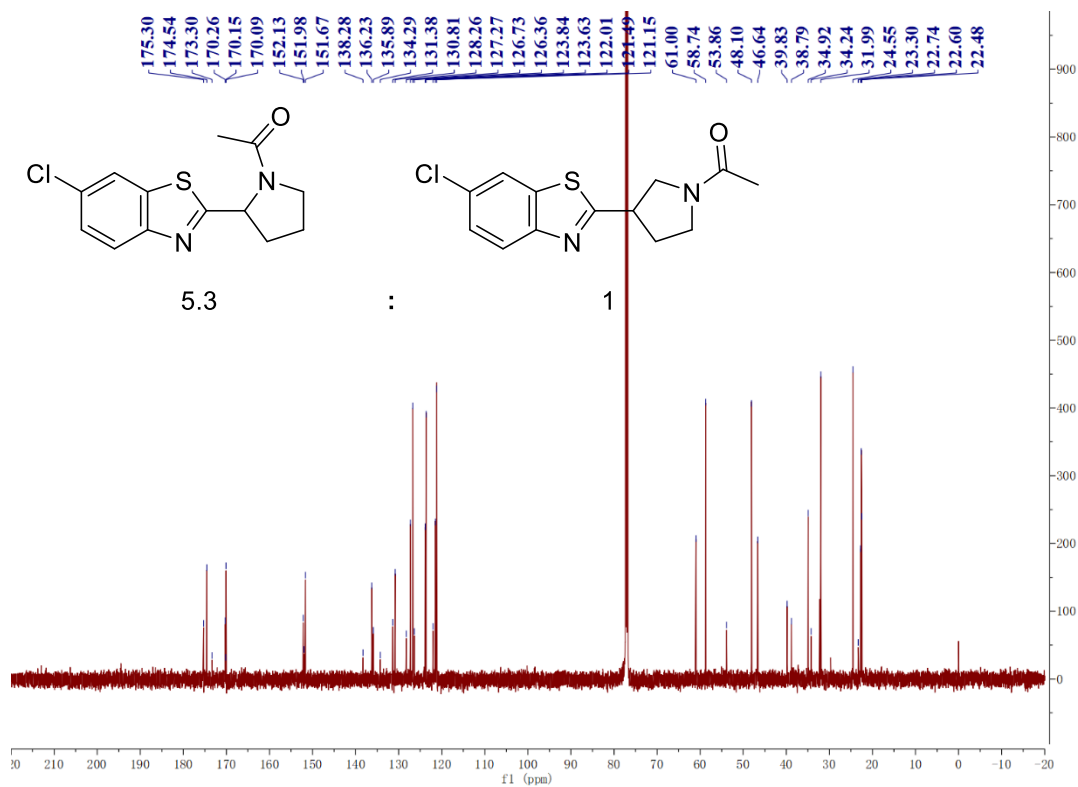

**<sup>1</sup>H NMR (600 MHz, CDCl<sub>3</sub>) of 81**

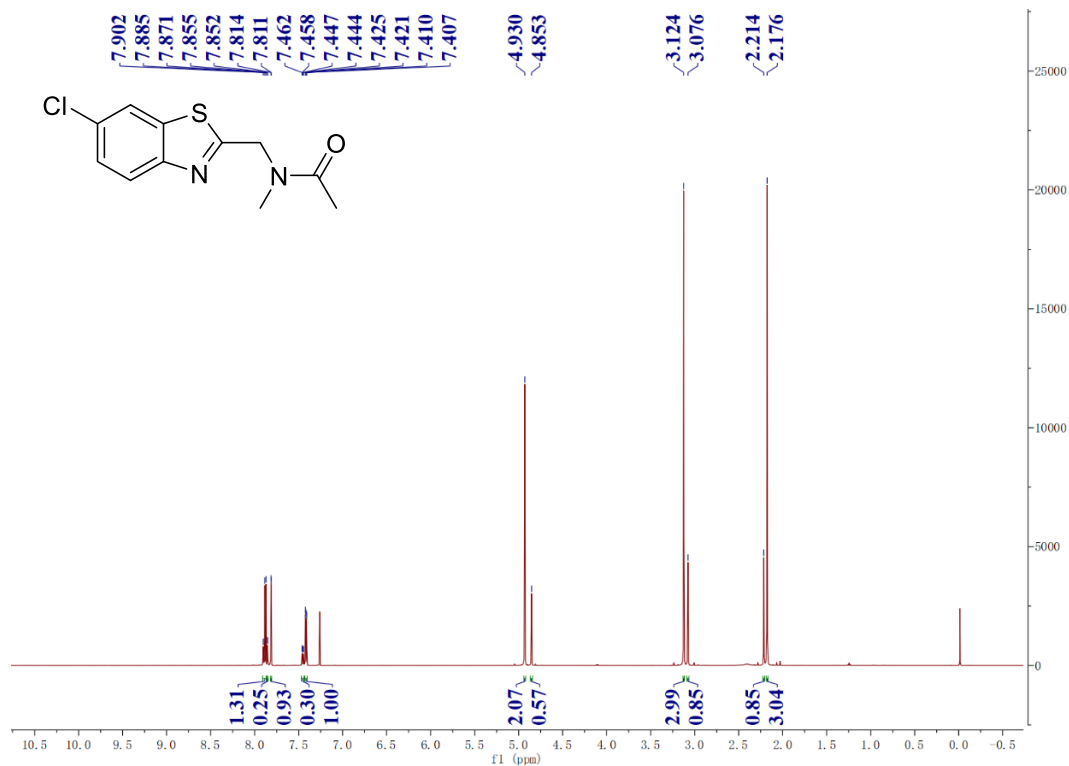

**<sup>13</sup>C NMR (151 MHz, CDCl<sub>3</sub>) of 81**

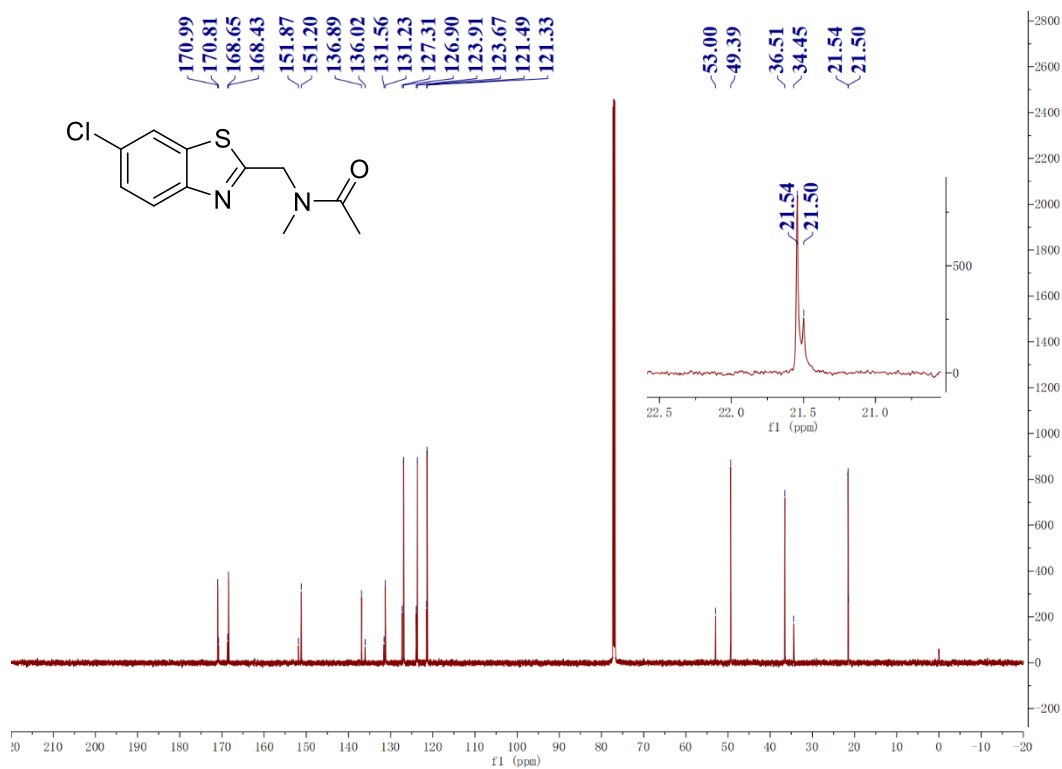

### <sup>1</sup>H NMR (600 MHz, CDCl<sub>3</sub>) of 10a

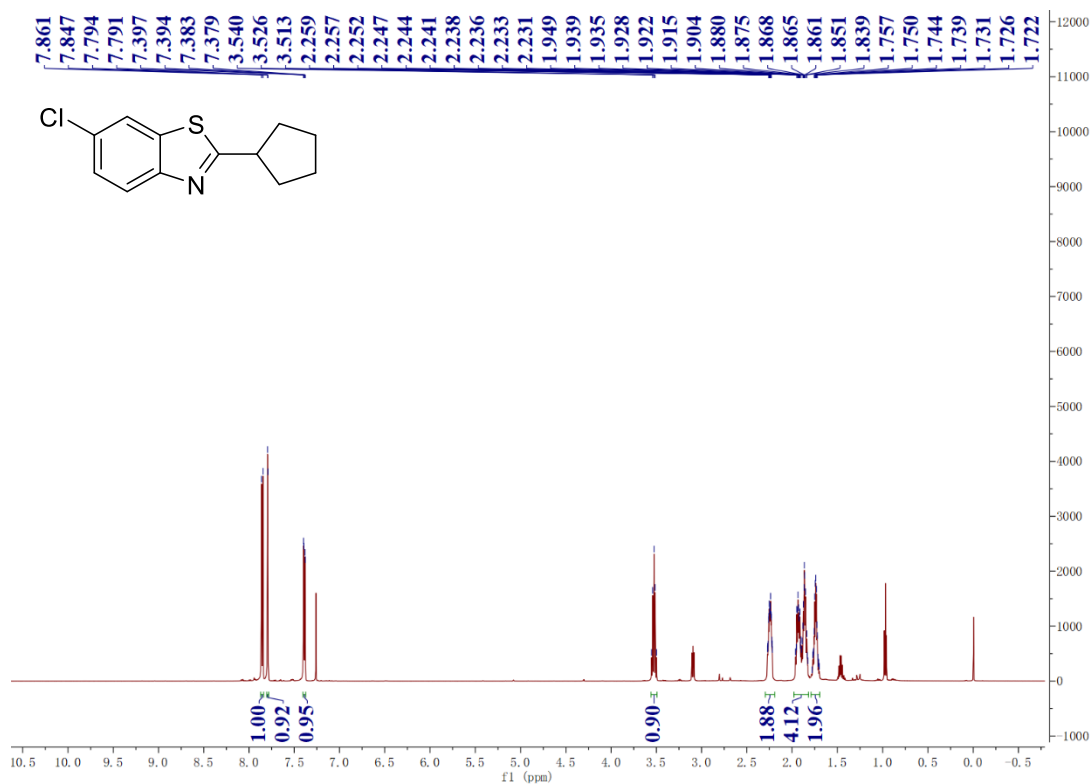

### <sup>13</sup>C NMR (151 MHz, CDCl<sub>3</sub>) of 10a

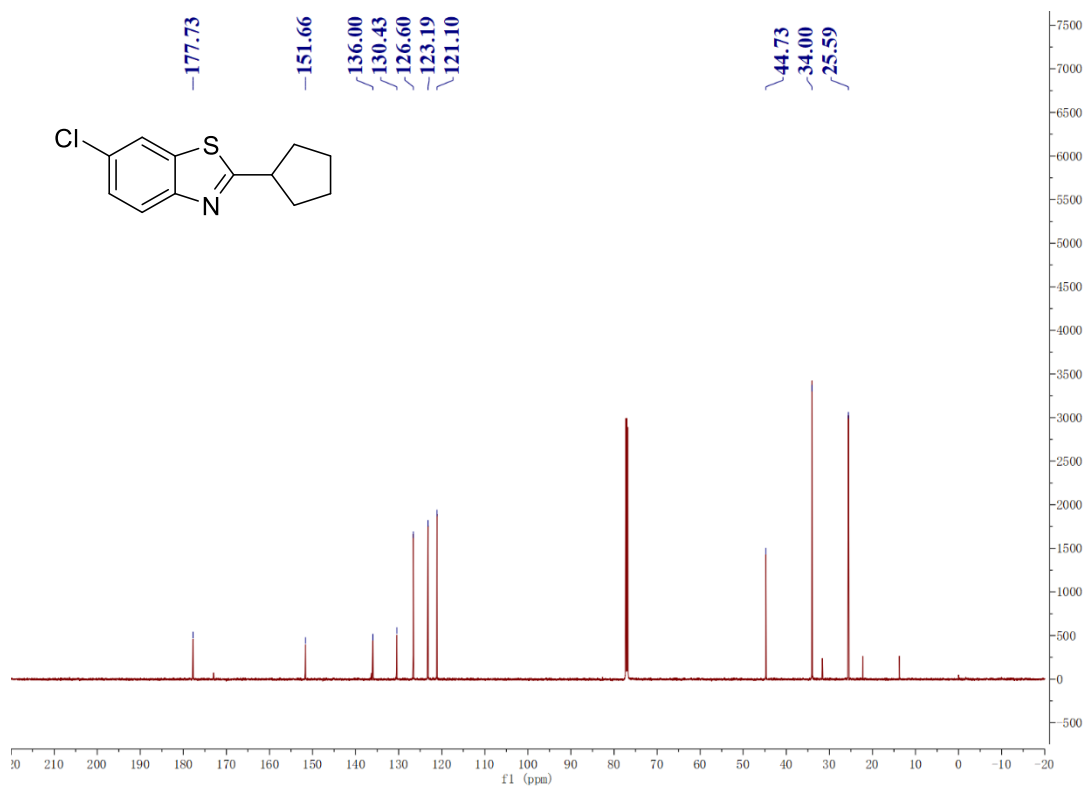

**<sup>1</sup>H NMR (600 MHz, CDCl<sub>3</sub>) of 10b**

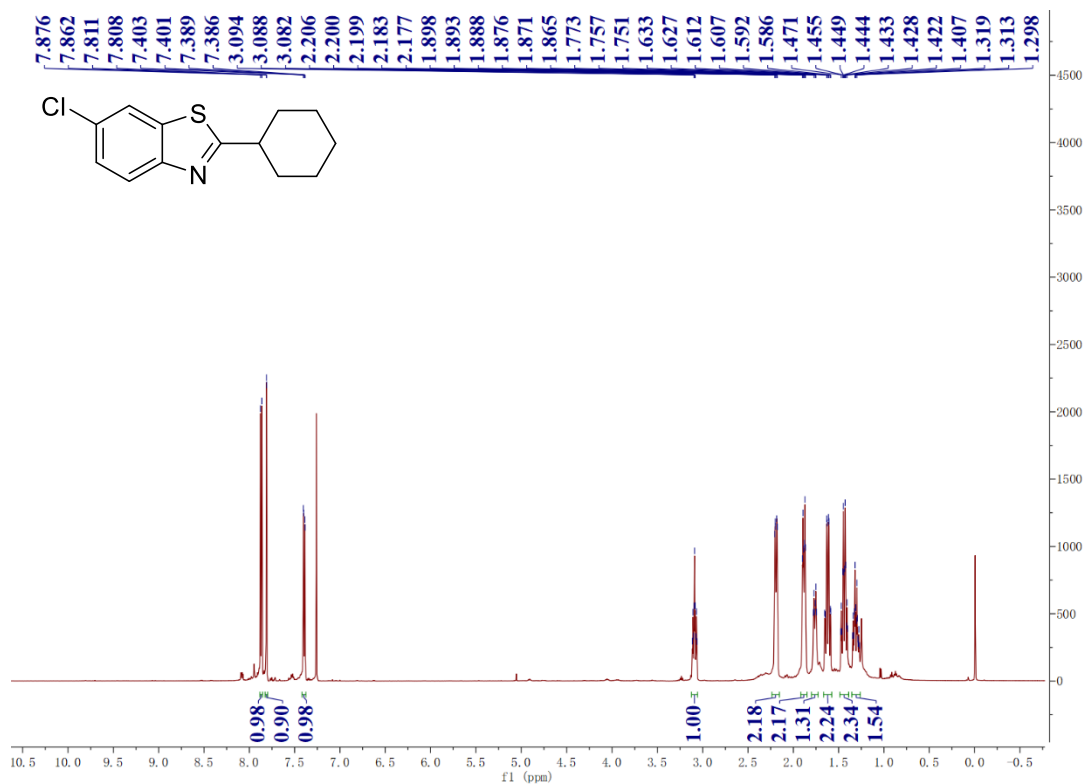

**<sup>13</sup>C NMR (151 MHz, CDCl<sub>3</sub>) of 10b**

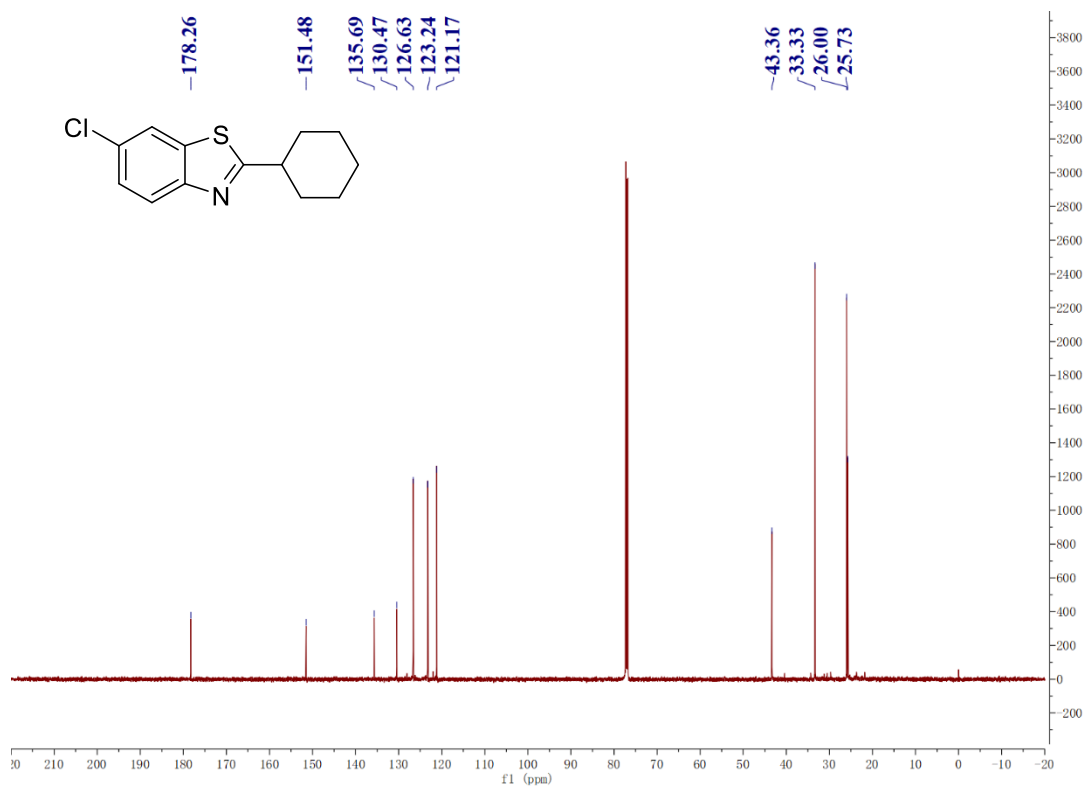

**<sup>1</sup>H NMR (600 MHz, CDCl<sub>3</sub>) of 10c**

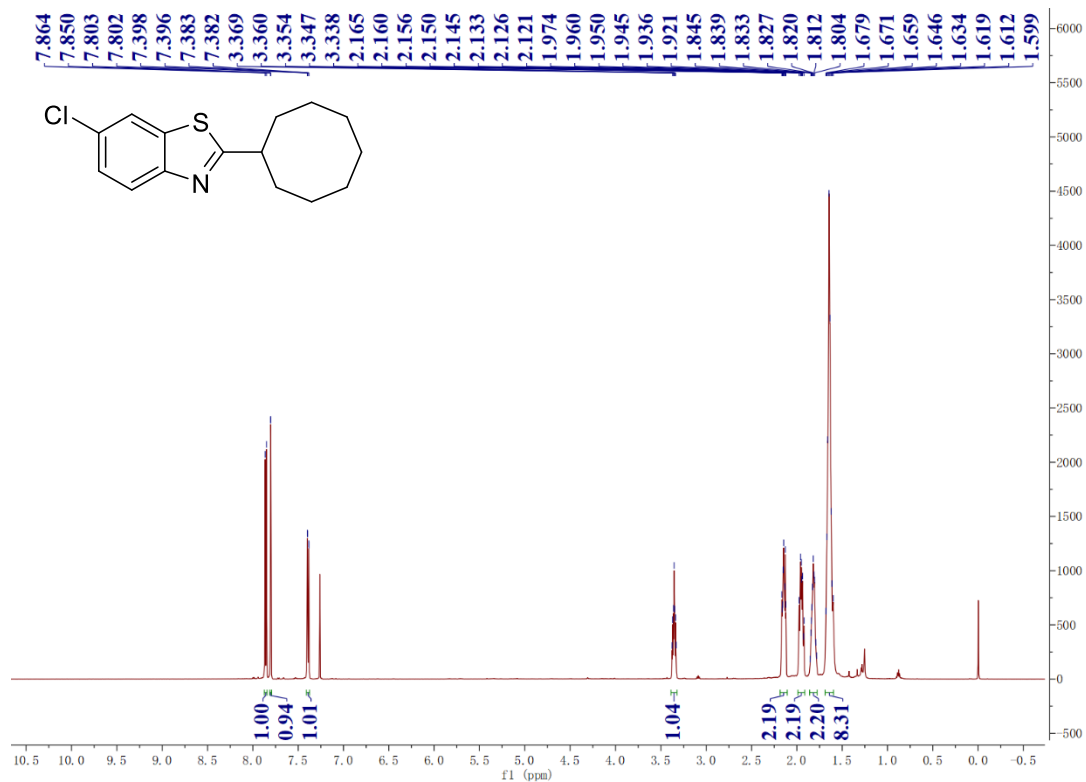

**<sup>13</sup>C NMR (151 MHz, CDCl<sub>3</sub>) of 10c**

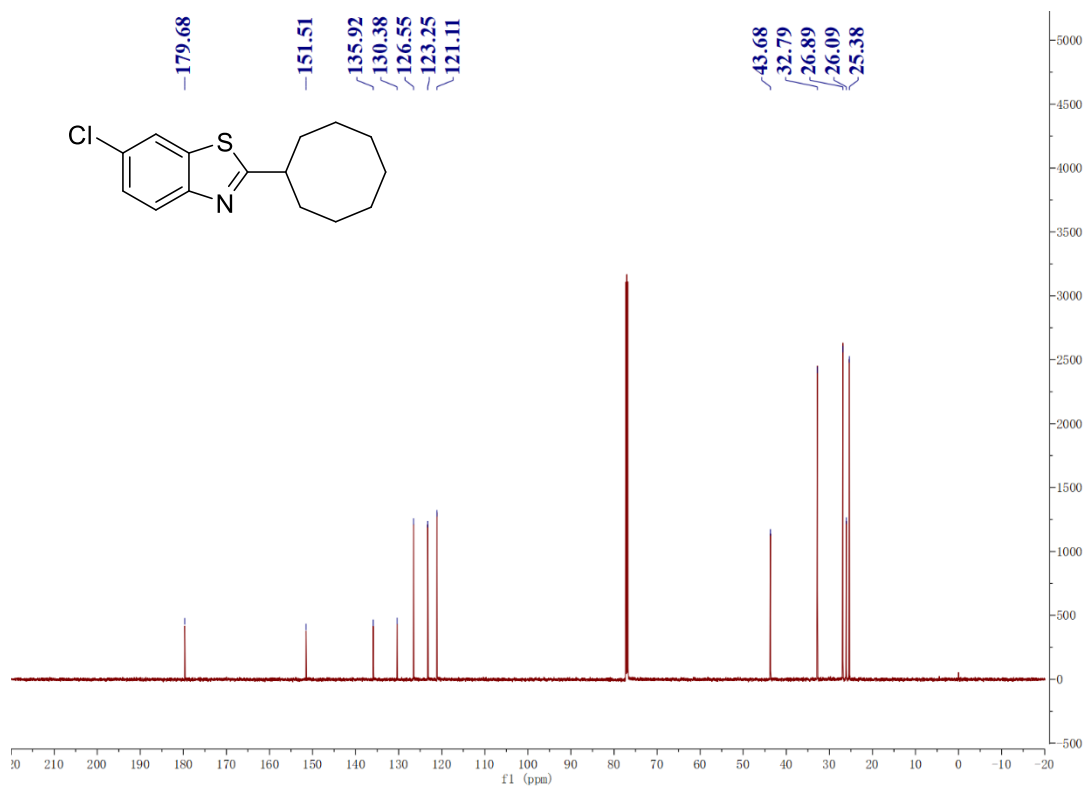

**<sup>1</sup>H NMR (400 MHz, CDCl<sub>3</sub>) of 10d**

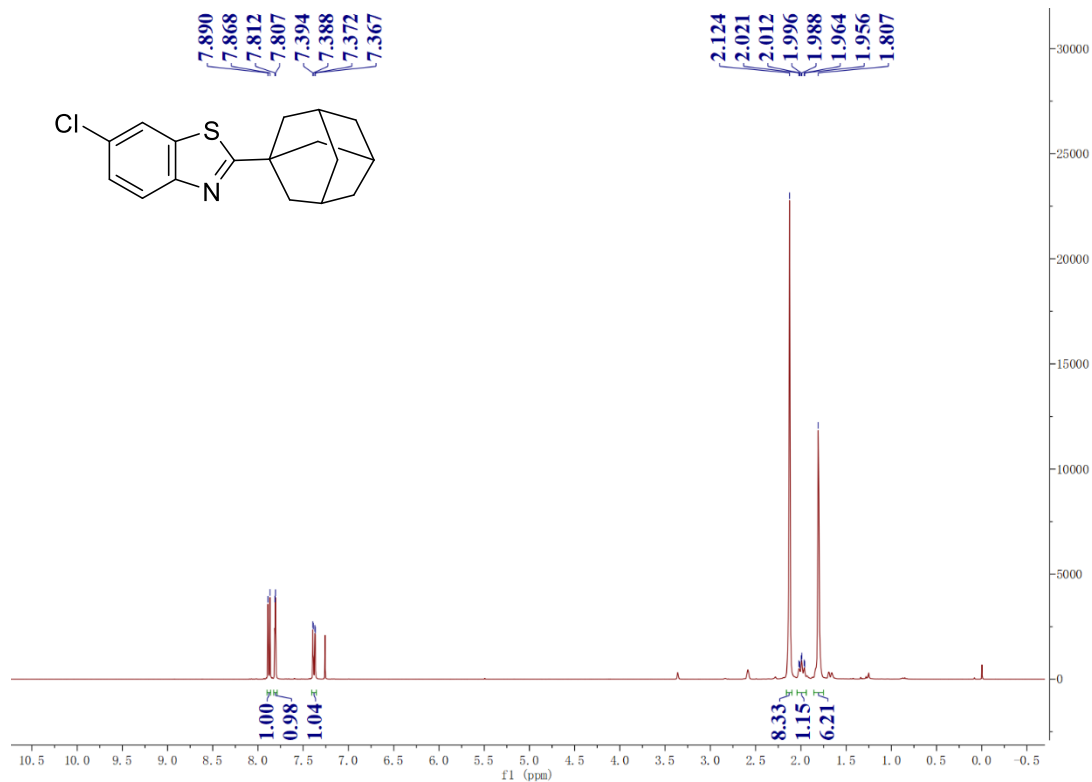

**<sup>13</sup>C NMR (101 MHz, CDCl<sub>3</sub>) of 10d**

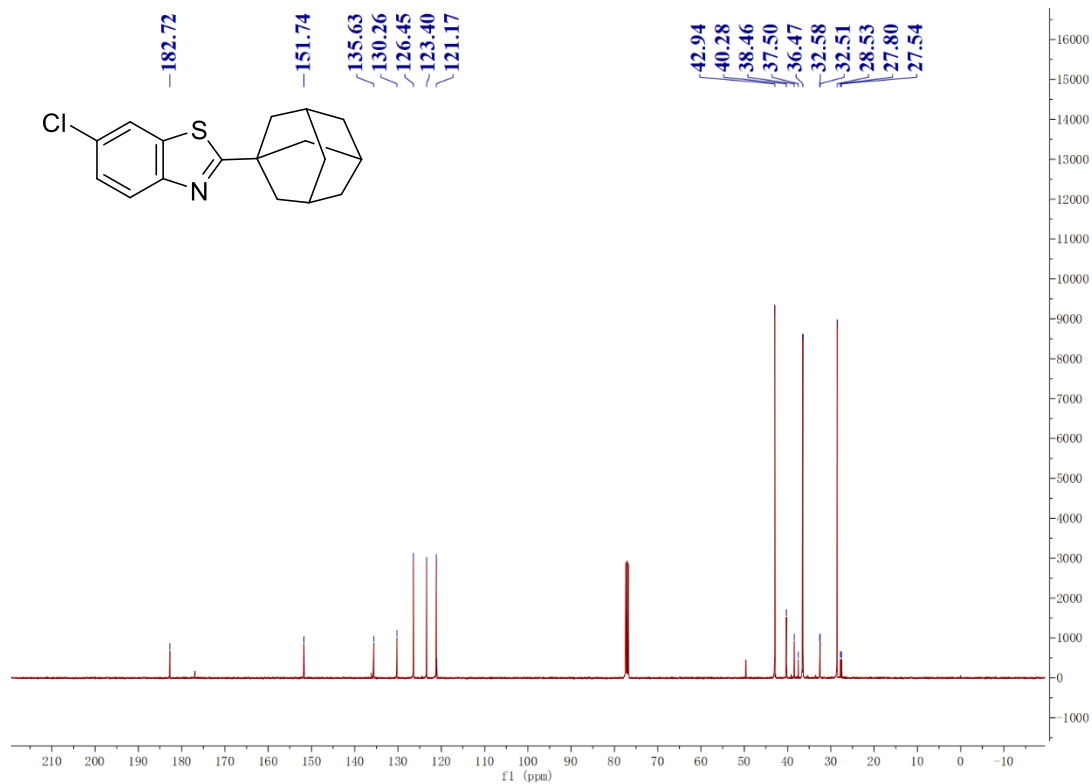

**<sup>1</sup>H NMR (400 MHz, CDCl<sub>3</sub>) of 11a**

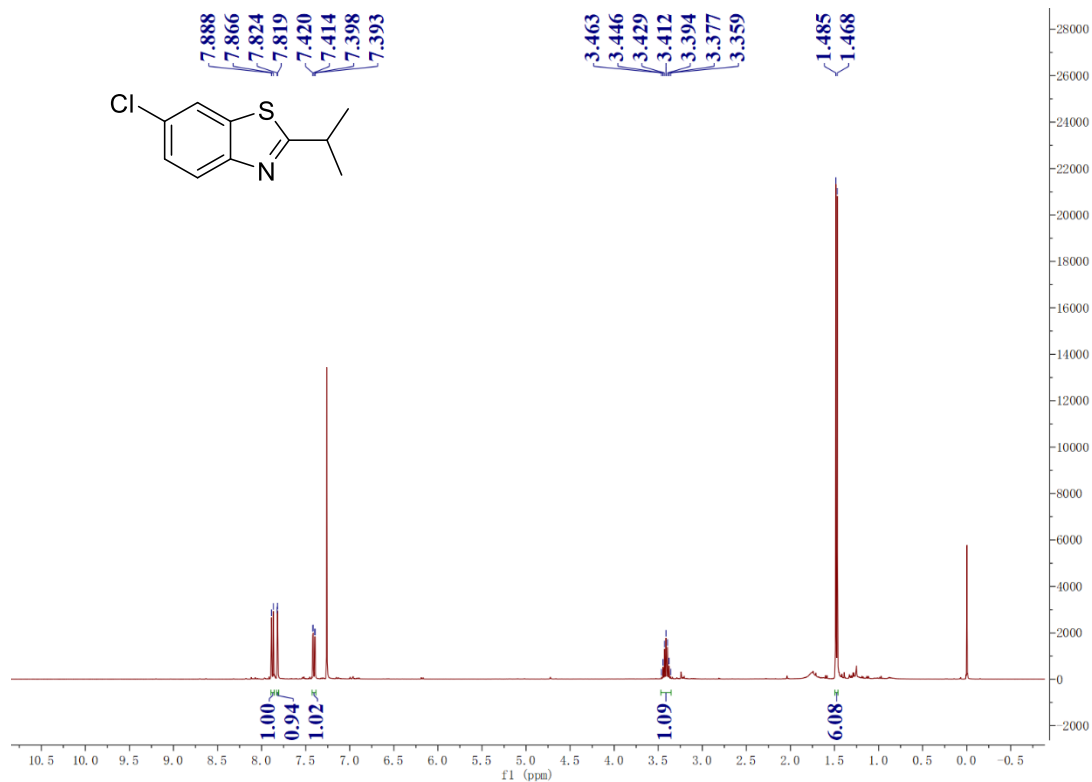

**<sup>13</sup>C NMR (151 MHz, CDCl<sub>3</sub>) of 11a**

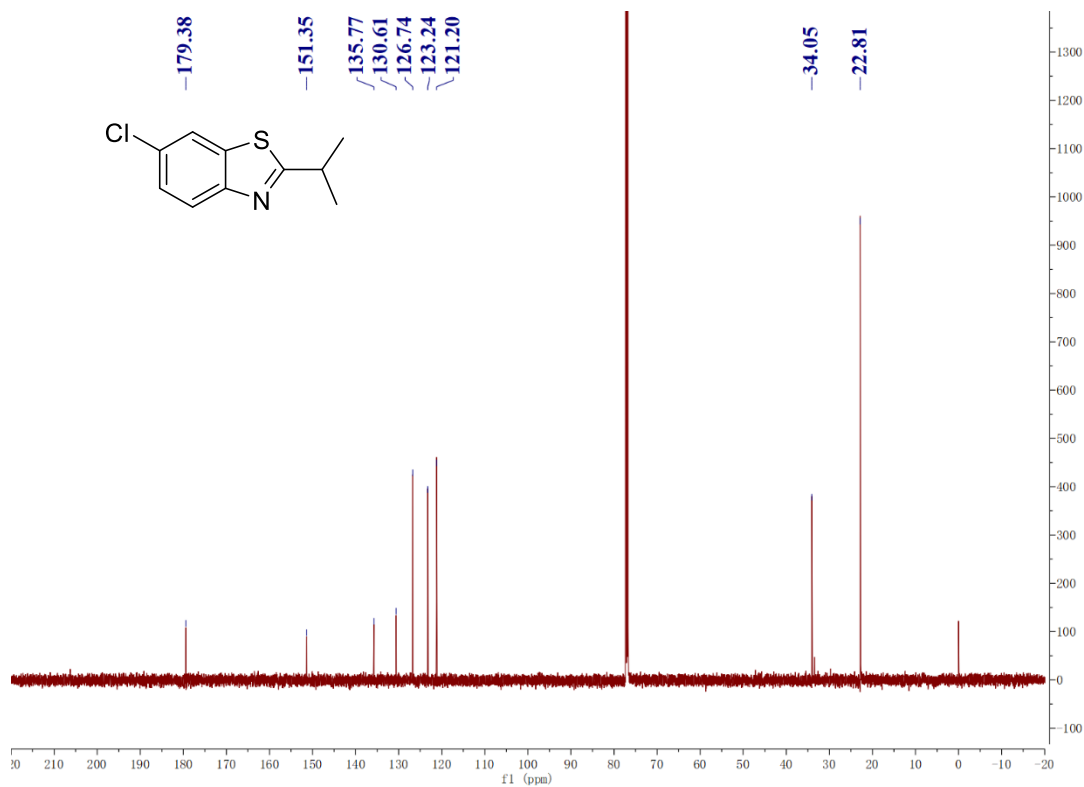

**<sup>1</sup>H NMR (600 MHz, CDCl<sub>3</sub>) of 11b**

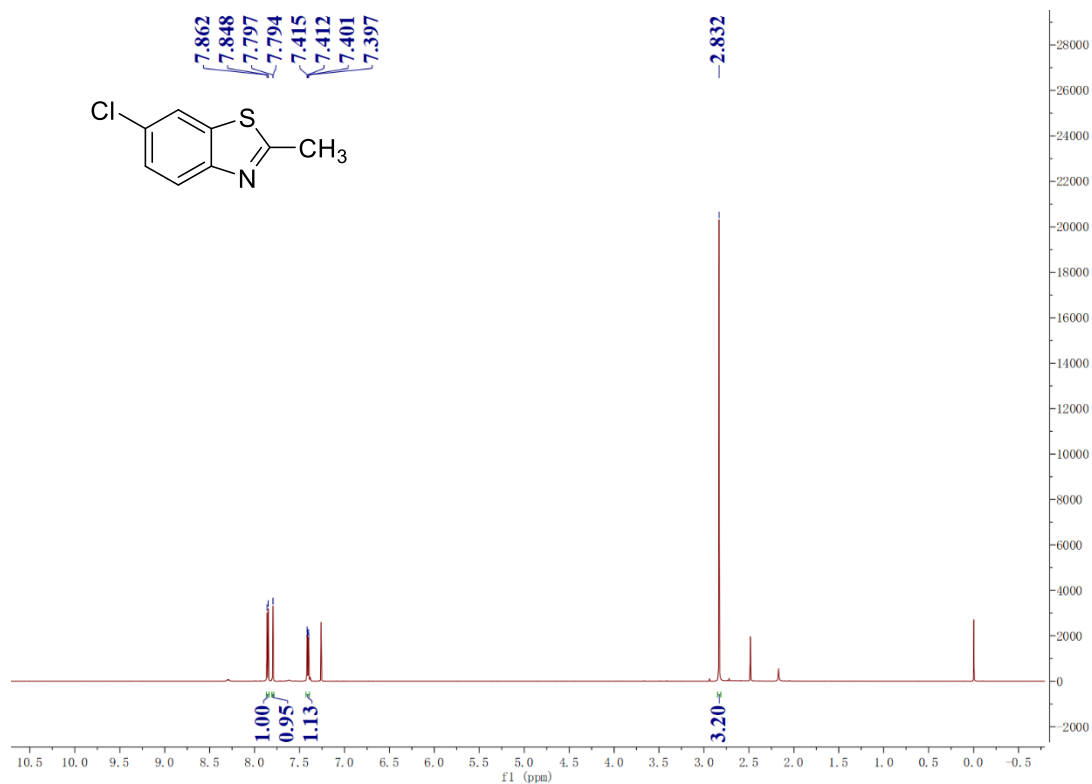

**<sup>13</sup>C NMR (151 MHz, CDCl<sub>3</sub>) of 11b**

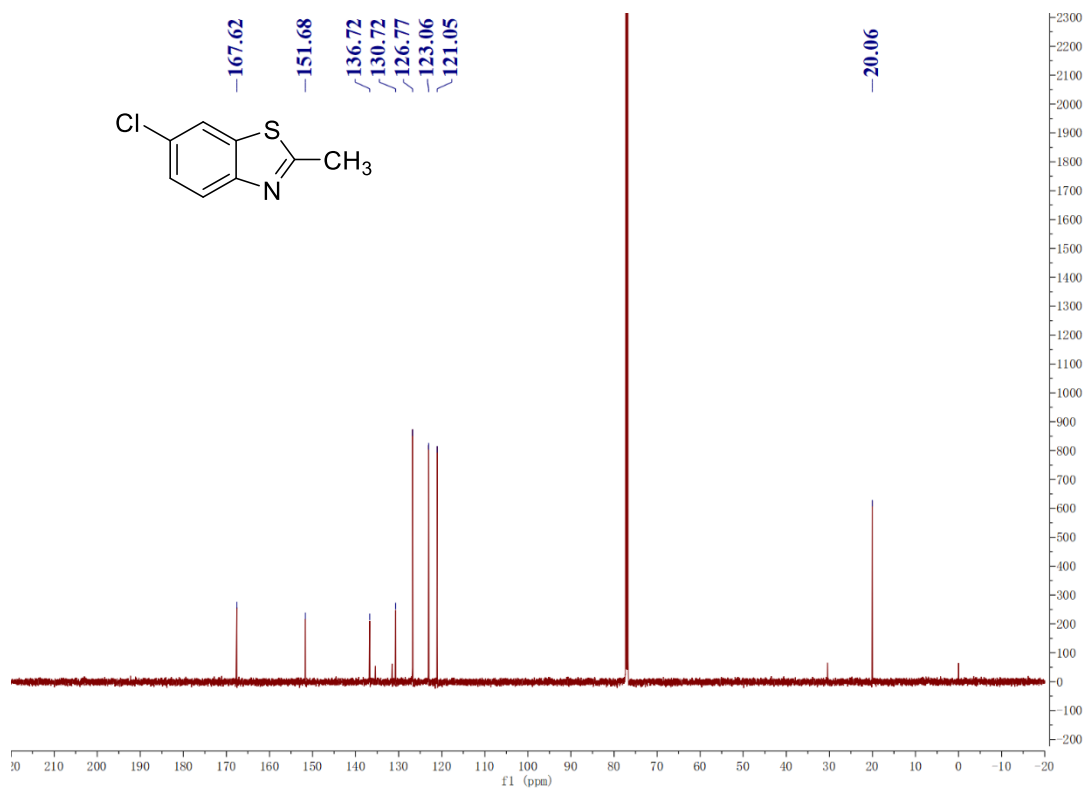



**<sup>1</sup>H NMR (600 MHz, CDCl<sub>3</sub>) of 11c**

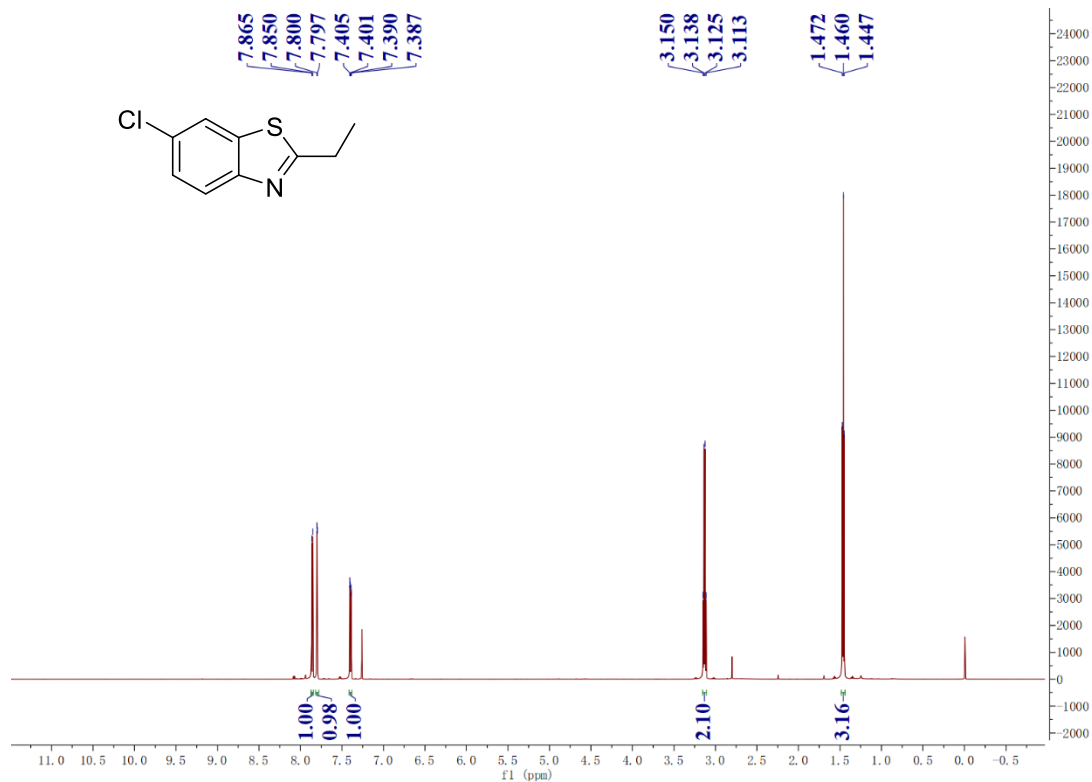

**<sup>13</sup>C NMR (151 MHz, CDCl<sub>3</sub>) of 11c**

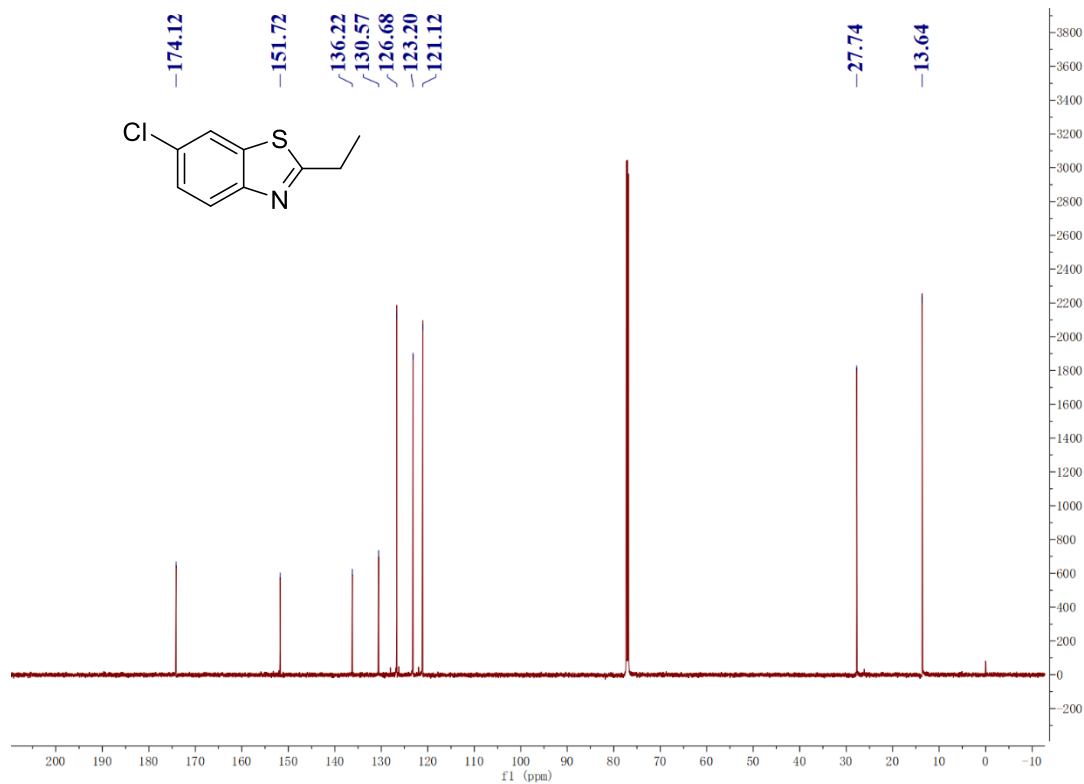

**<sup>1</sup>H NMR (600 MHz, CDCl<sub>3</sub>) of 11d**

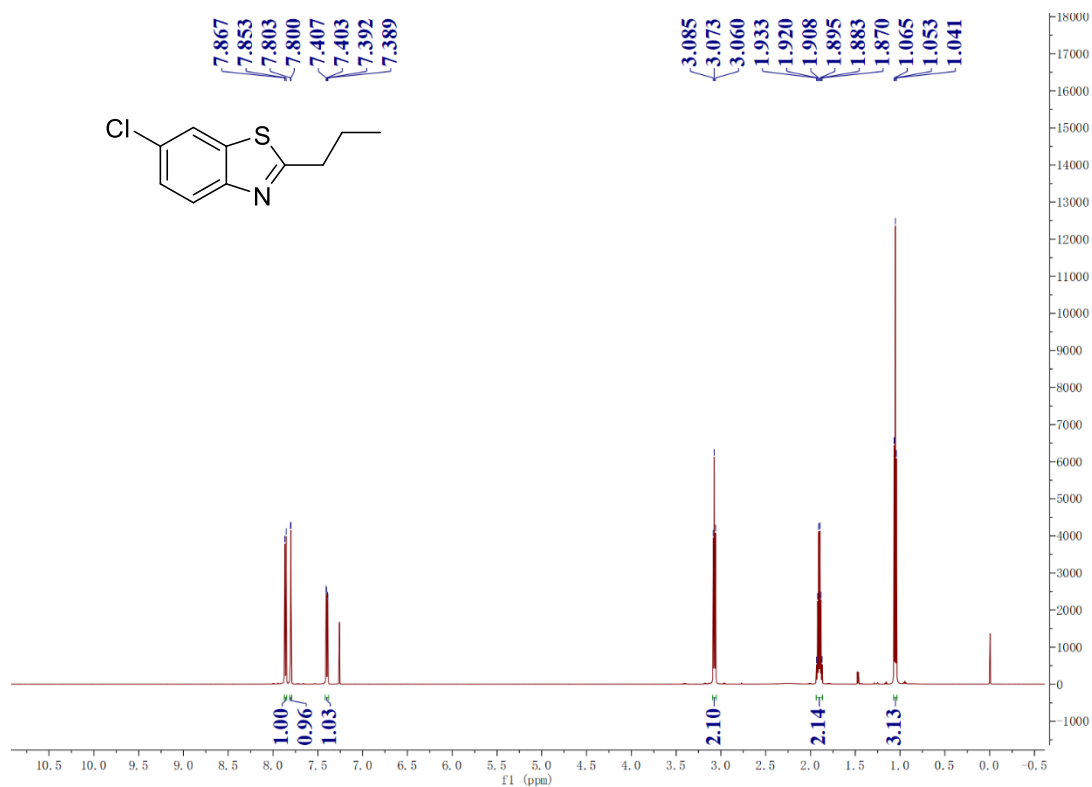

**<sup>13</sup>C NMR (151 MHz, CDCl<sub>3</sub>) of 11d**

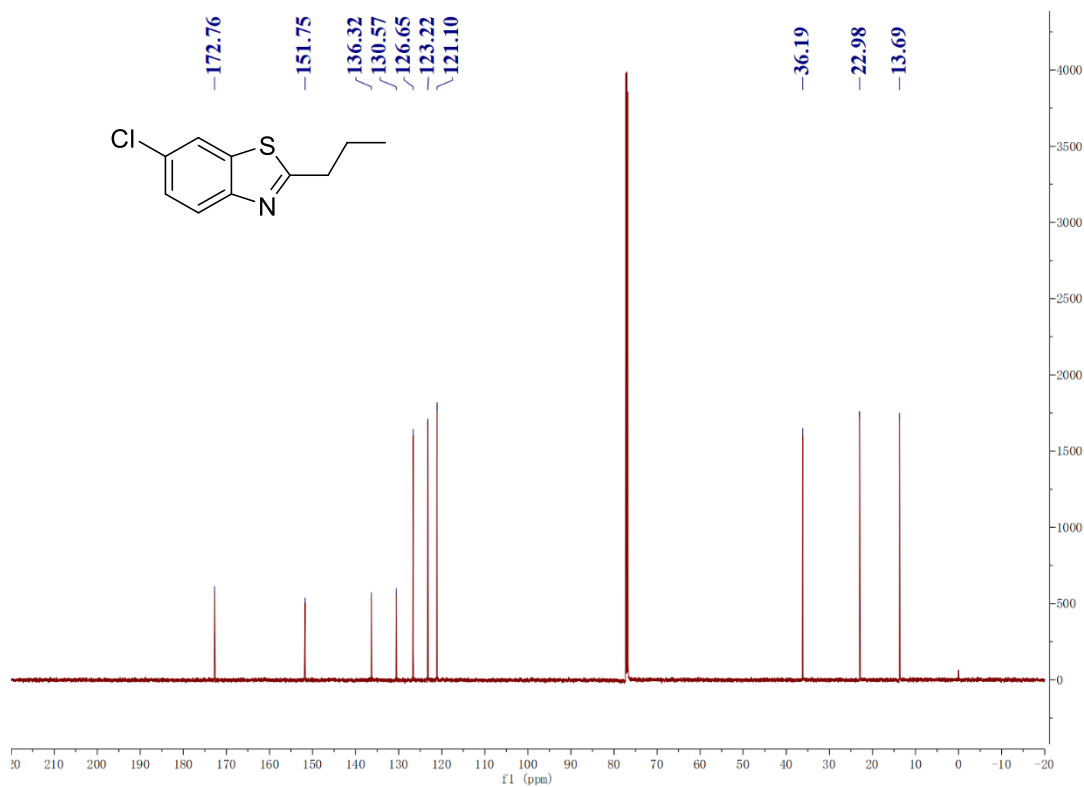

**<sup>1</sup>H NMR (600 MHz, CDCl<sub>3</sub>) of 11e**

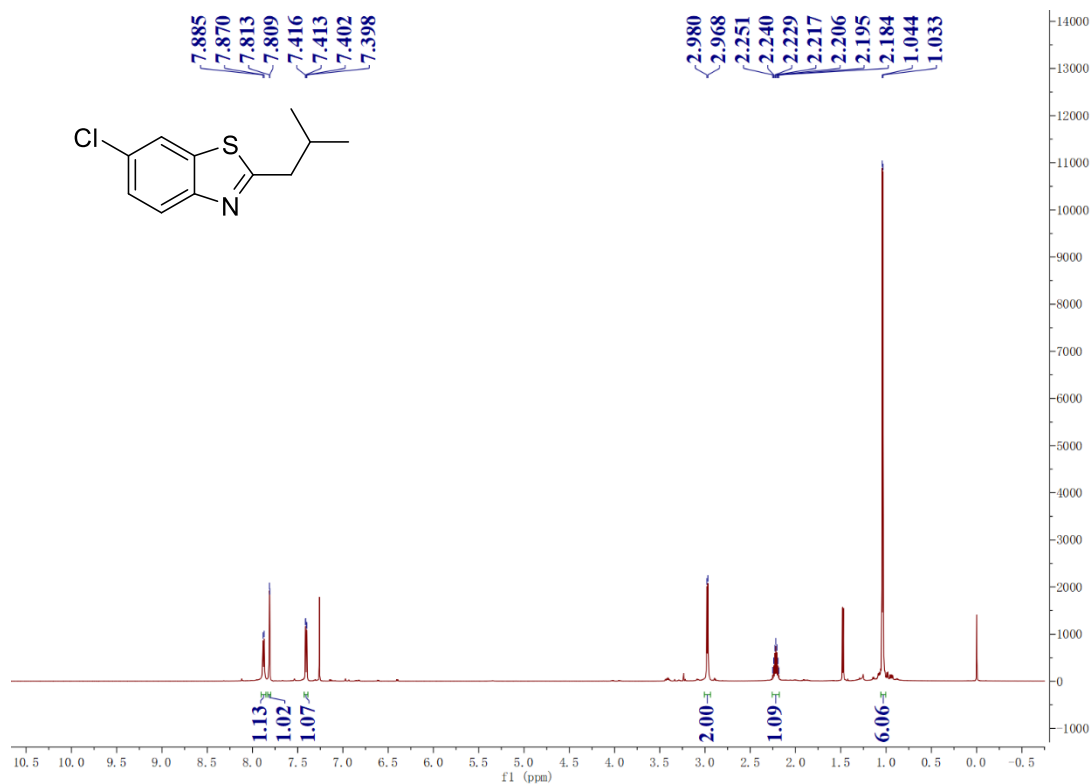

**<sup>13</sup>C NMR (151 MHz, CDCl<sub>3</sub>) of 11e**

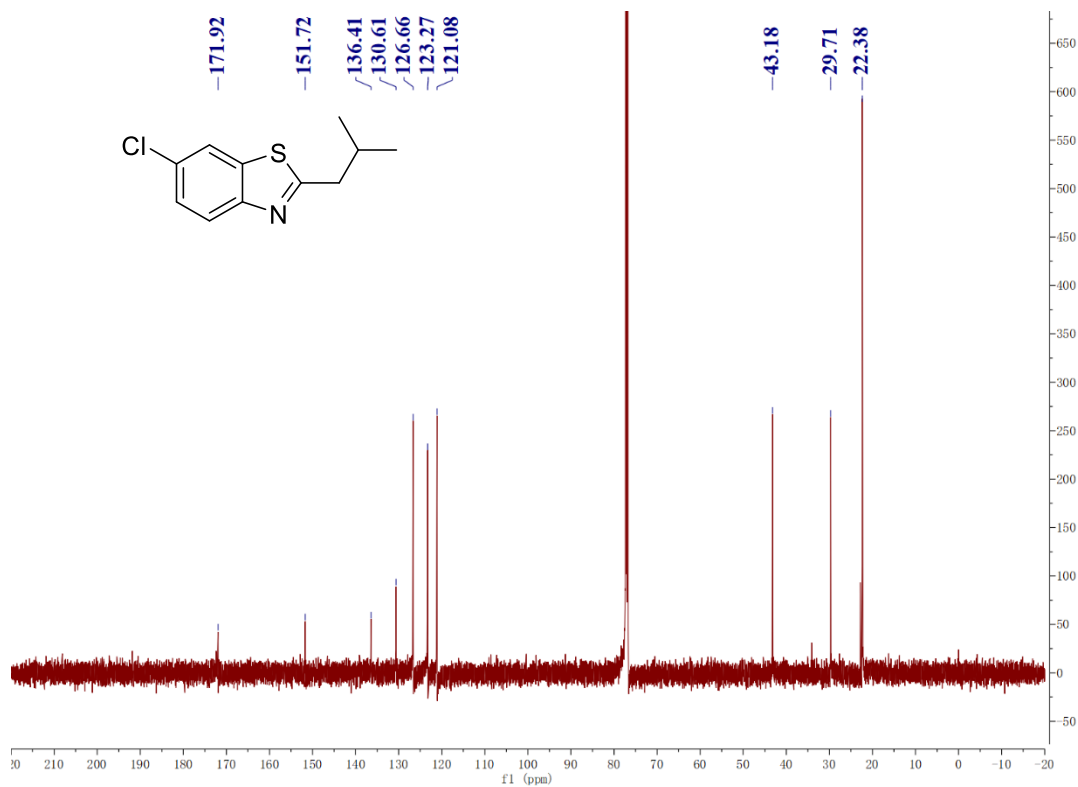

**<sup>1</sup>H NMR (600 MHz, CDCl<sub>3</sub>) of 11f**

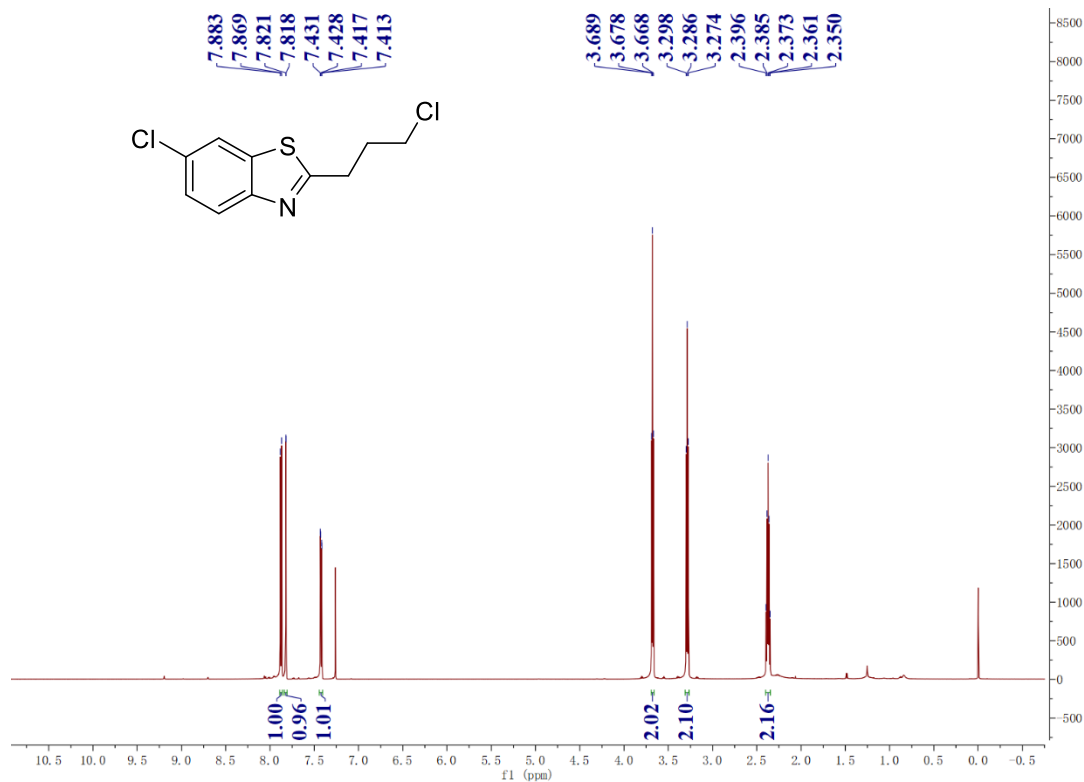

**<sup>13</sup>C NMR (151 MHz, CDCl<sub>3</sub>) of 11f**

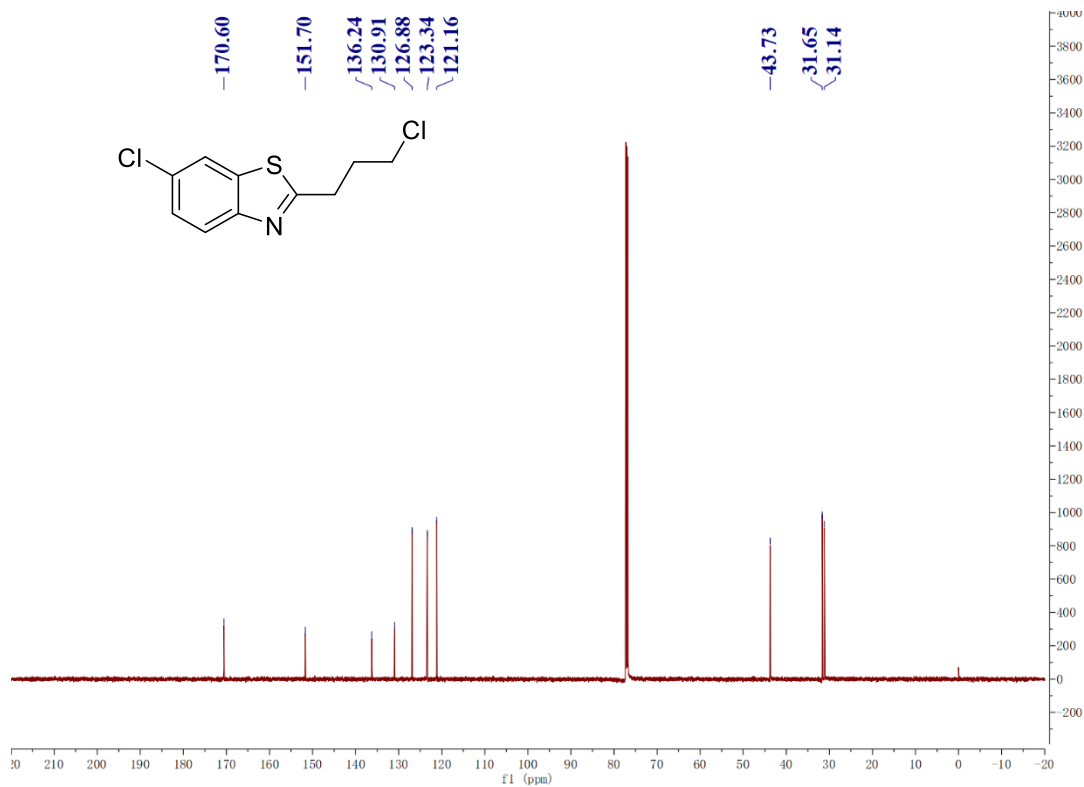

**<sup>1</sup>H NMR (600 MHz, CDCl<sub>3</sub>) of 11g**

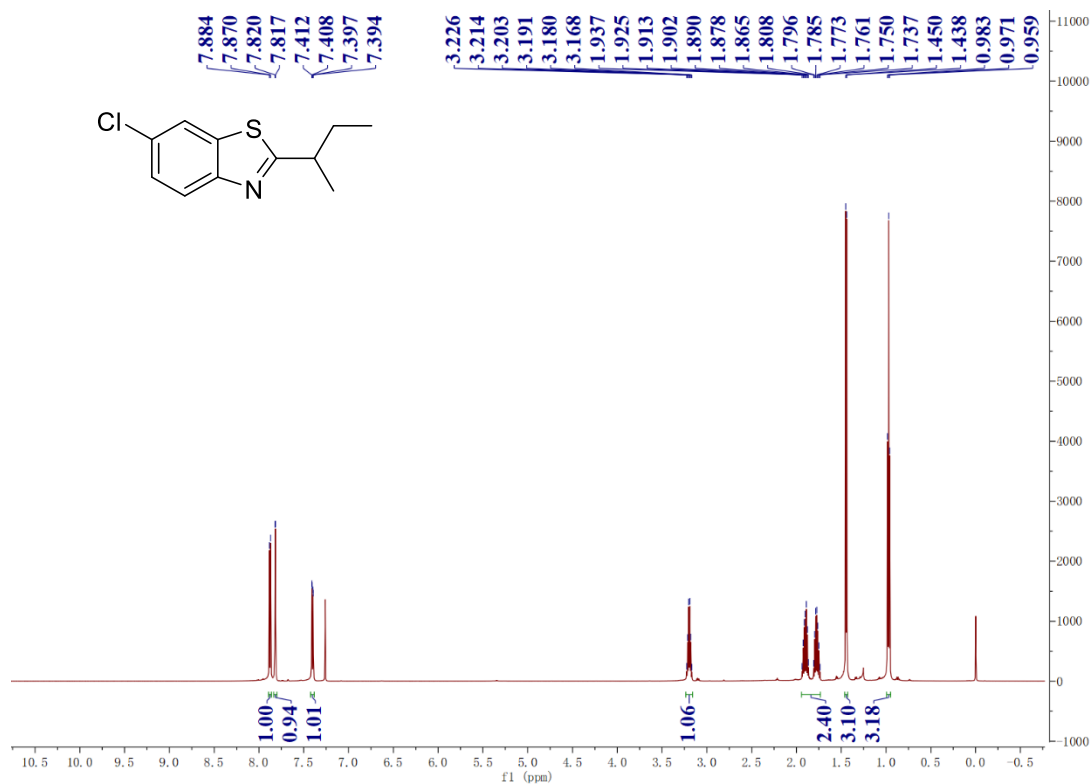

**<sup>13</sup>C NMR (151 MHz, CDCl<sub>3</sub>) of 11g**

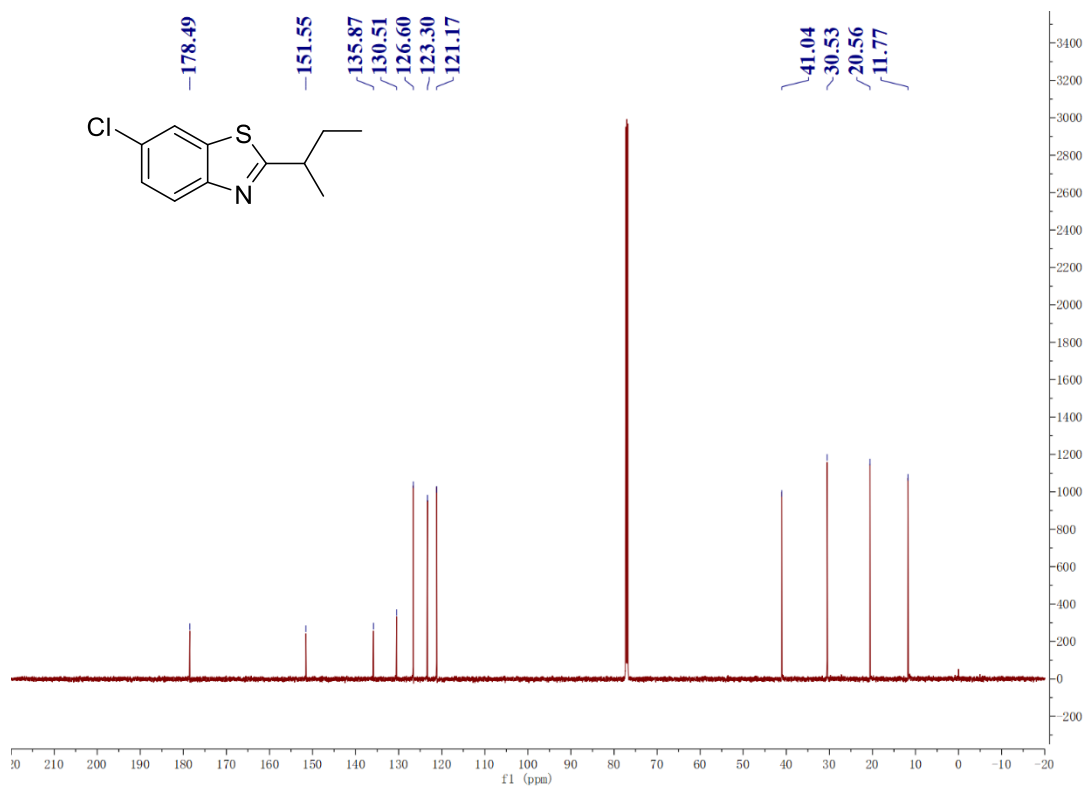

### <sup>1</sup>H NMR (400 MHz, CDCl<sub>3</sub>) of 11i and 11i'

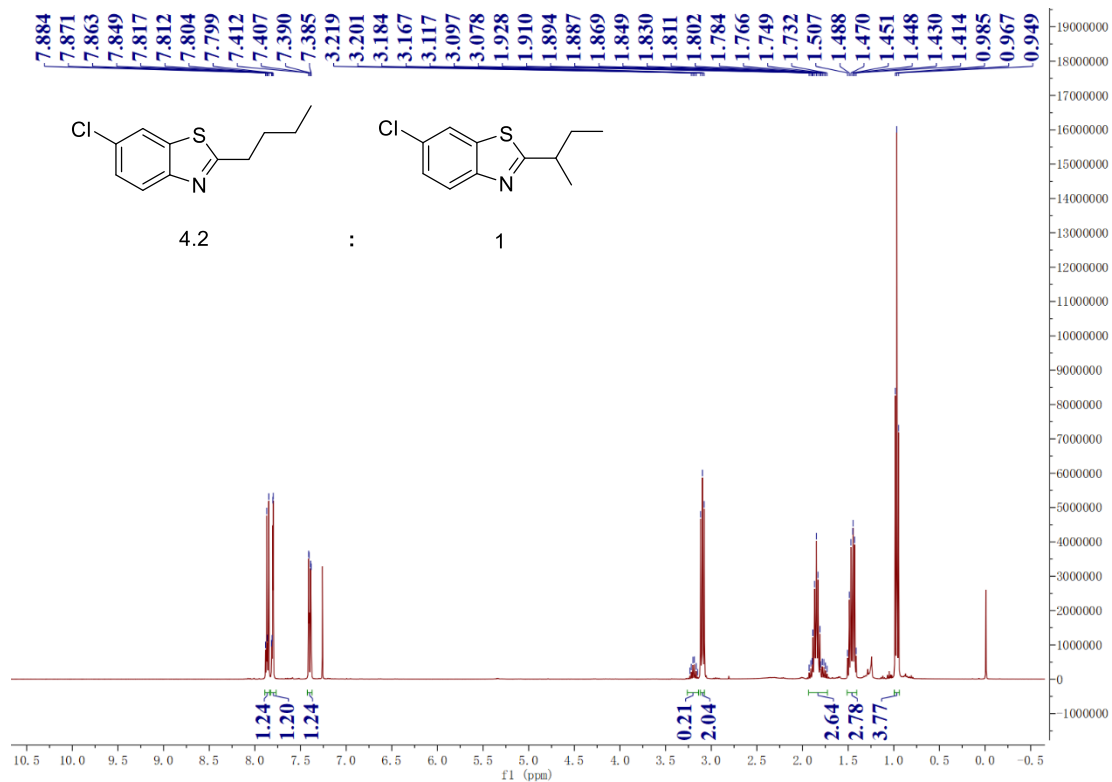

### <sup>13</sup>C NMR (101 MHz, CDCl<sub>3</sub>) of 11i and 11i'

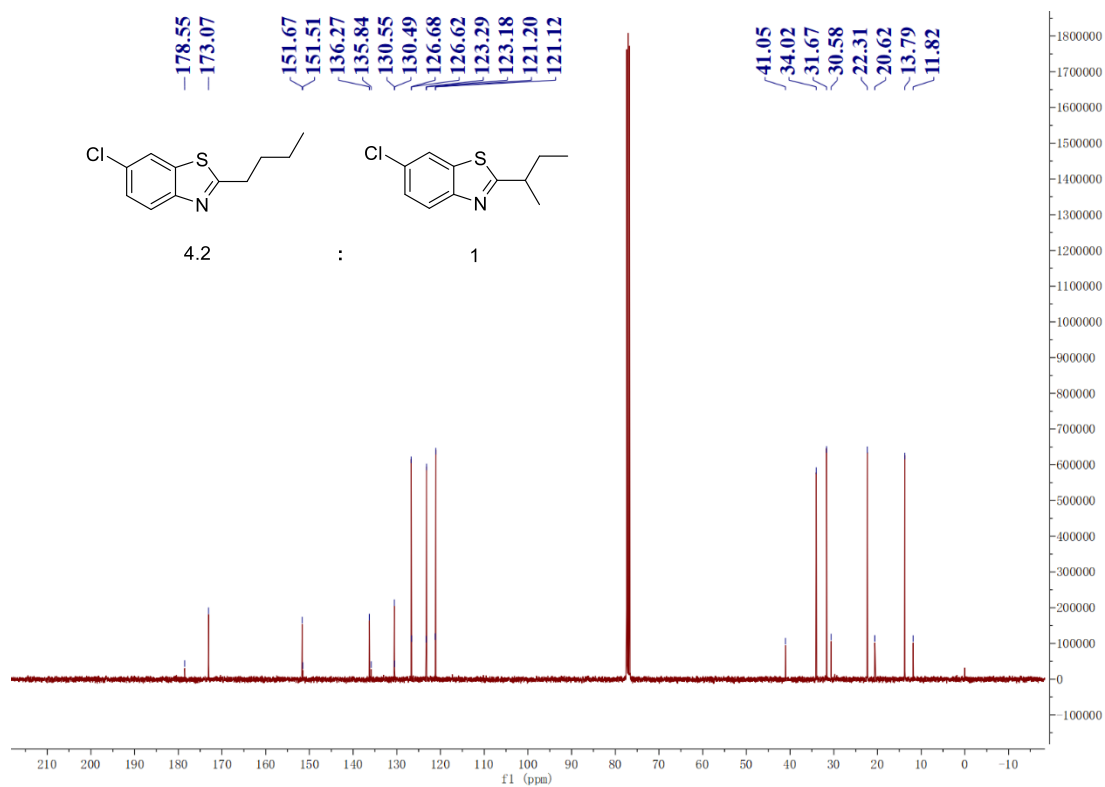

**<sup>1</sup>H NMR (400 MHz, CDCl<sub>3</sub>) of 11j and 11j'**

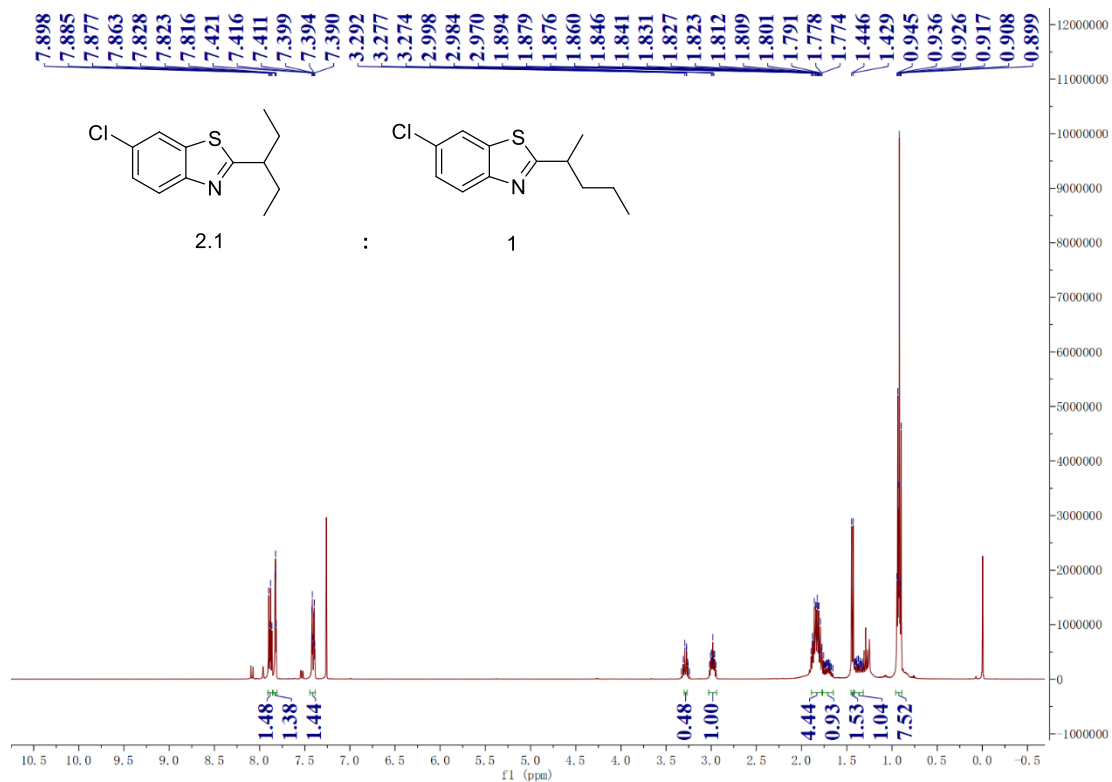

**<sup>13</sup>C NMR (101 MHz, CDCl<sub>3</sub>) of 11j and 11j'**

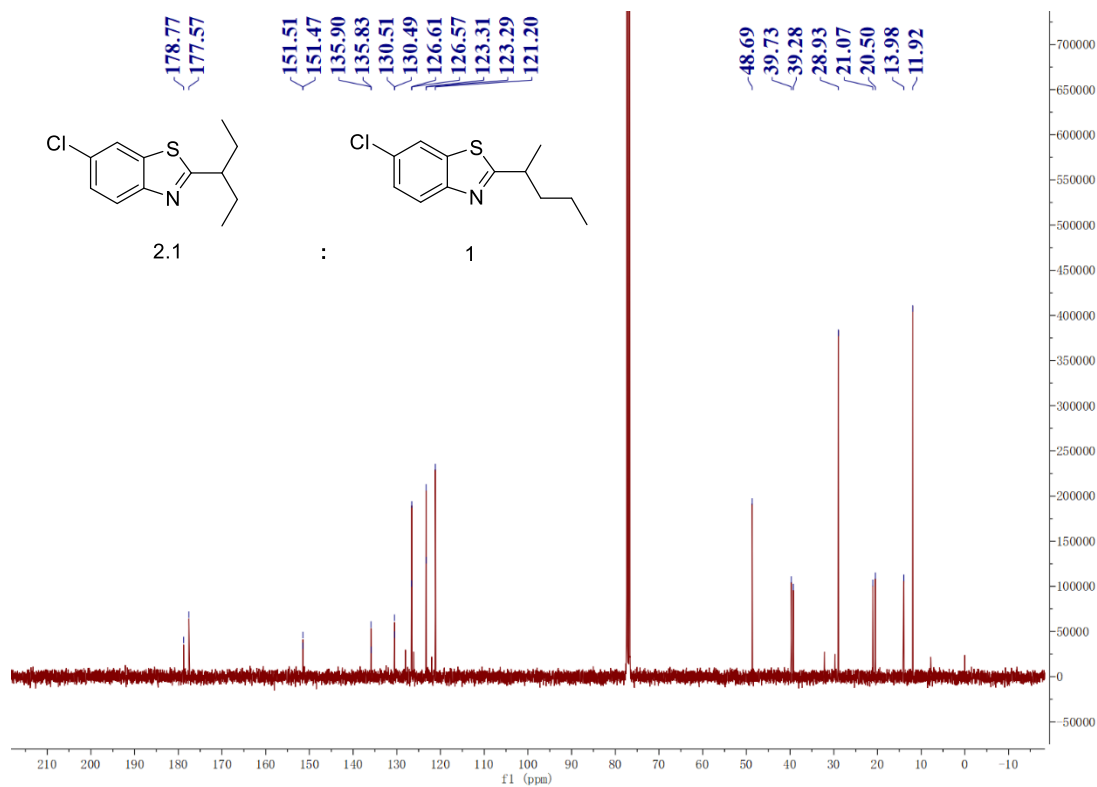

**<sup>1</sup>H NMR (400 MHz, CDCl<sub>3</sub>) of 11k and 11k'**

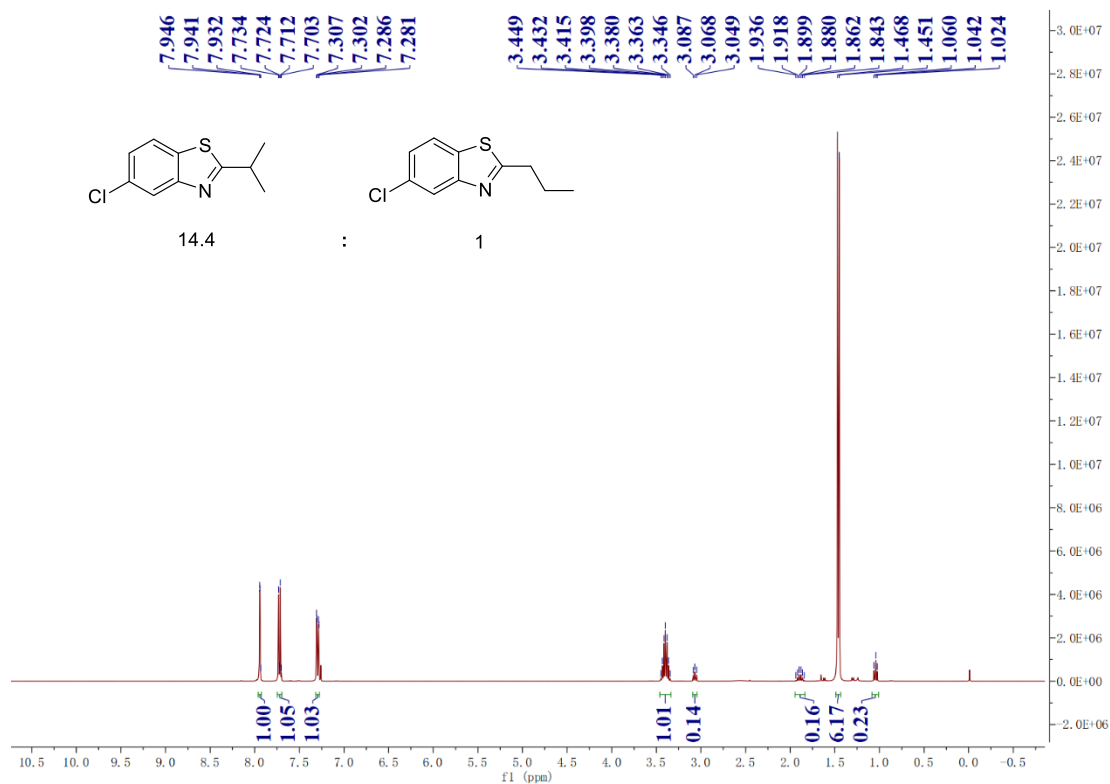

**<sup>13</sup>C NMR (101 MHz, CDCl<sub>3</sub>) of 11k and 11k'**

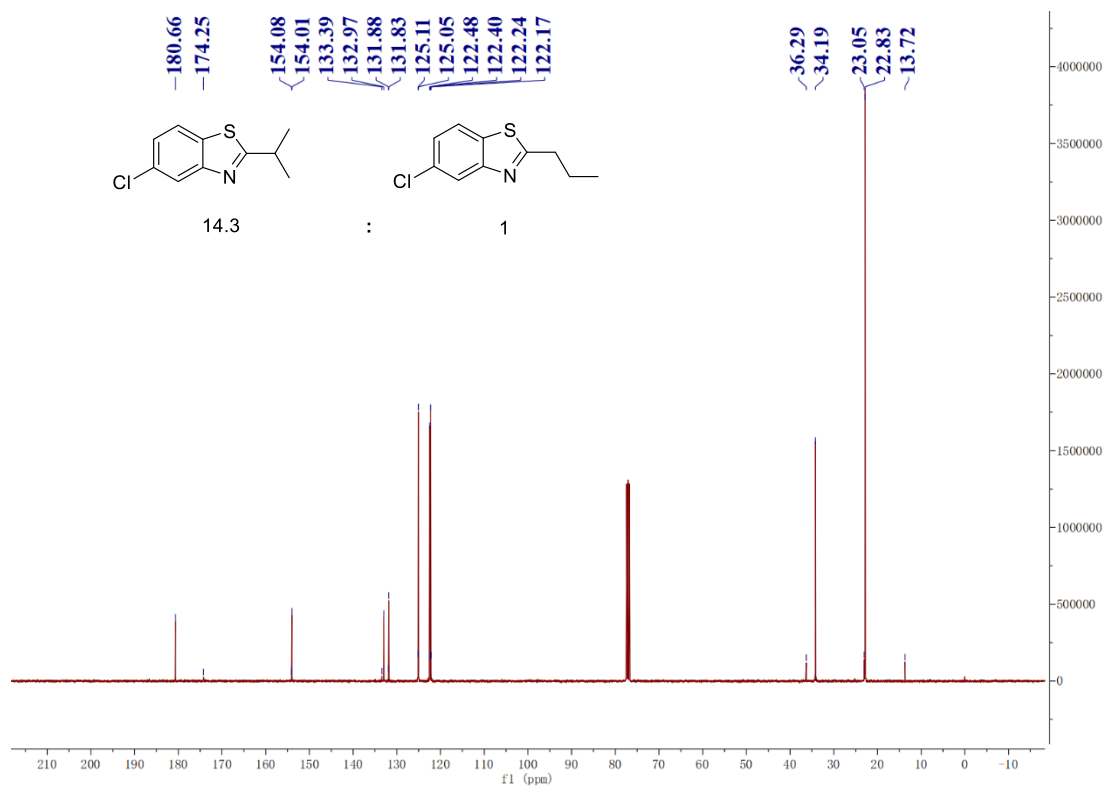



**<sup>1</sup>H NMR (600 MHz, CDCl<sub>3</sub>) of 16**

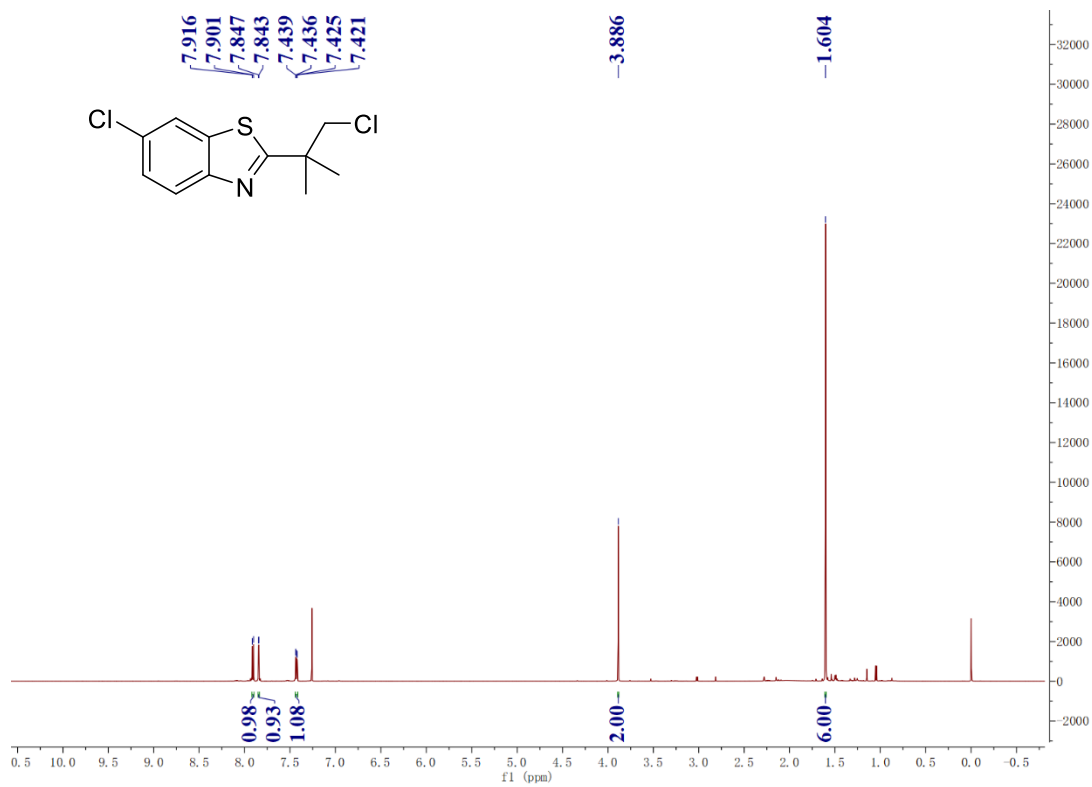

**<sup>13</sup>C NMR (151 MHz, CDCl<sub>3</sub>) of 16**

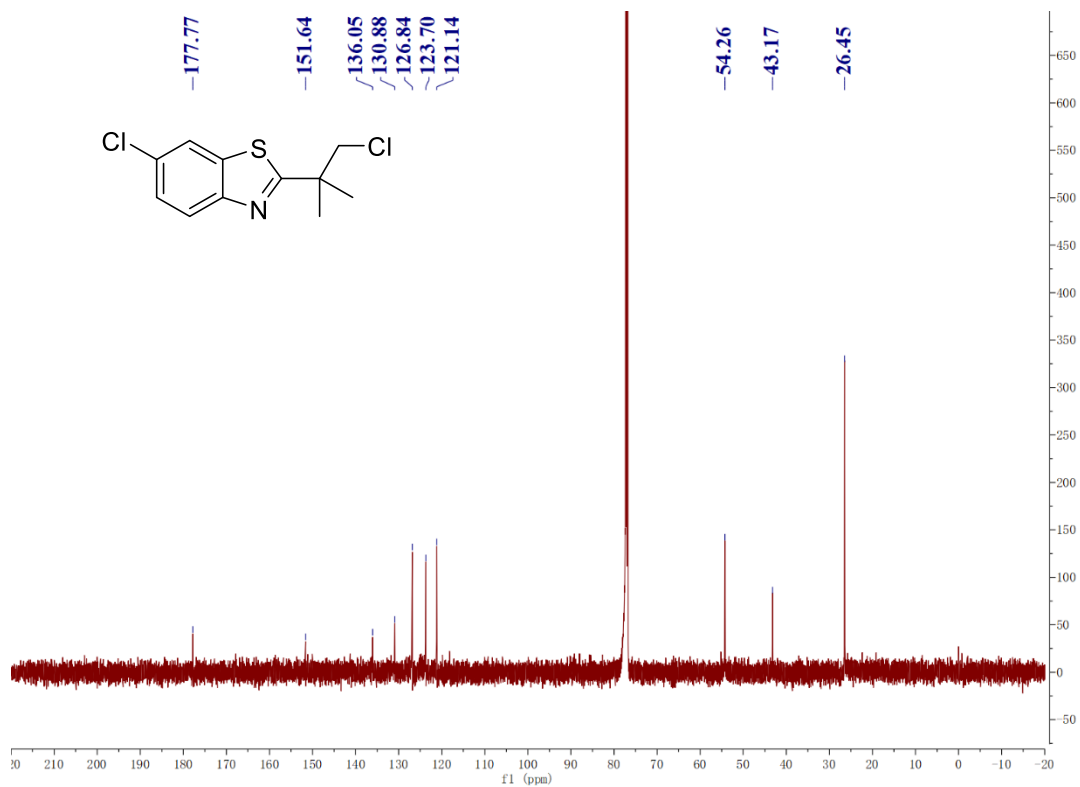

**<sup>1</sup>H NMR (600 MHz, CDCl<sub>3</sub>) of 3a-d<sub>6</sub>**

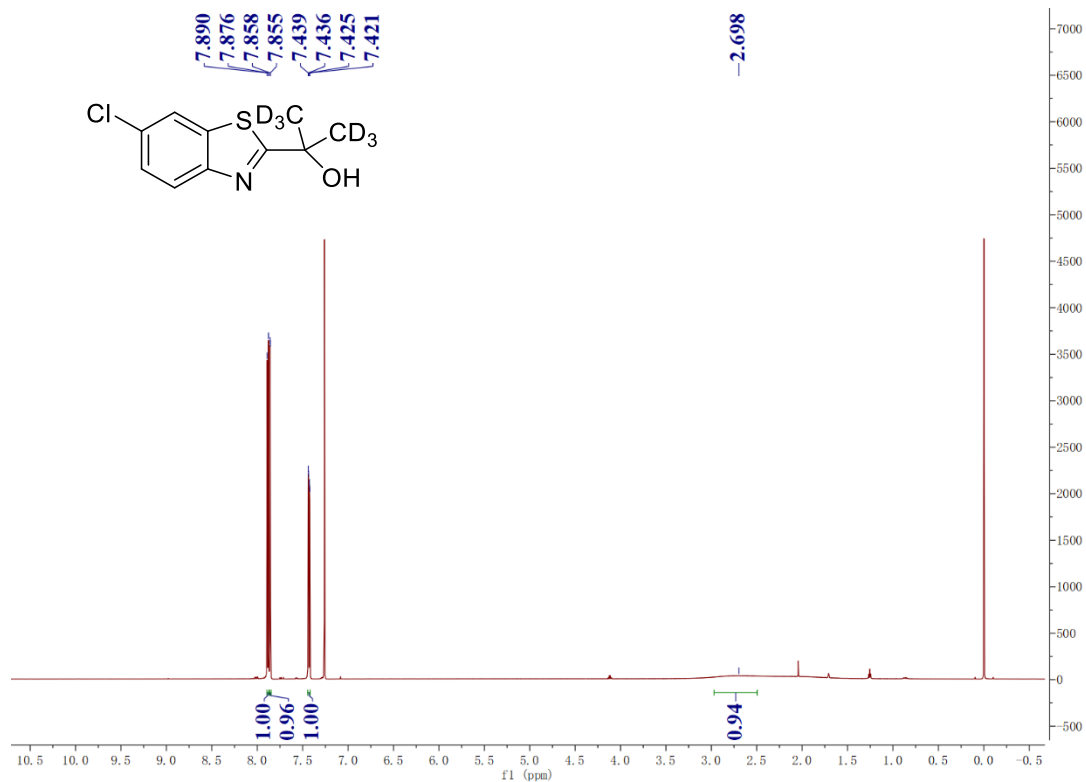

**<sup>13</sup>C NMR (151 MHz, CDCl<sub>3</sub>) of 3a-d<sub>6</sub>**

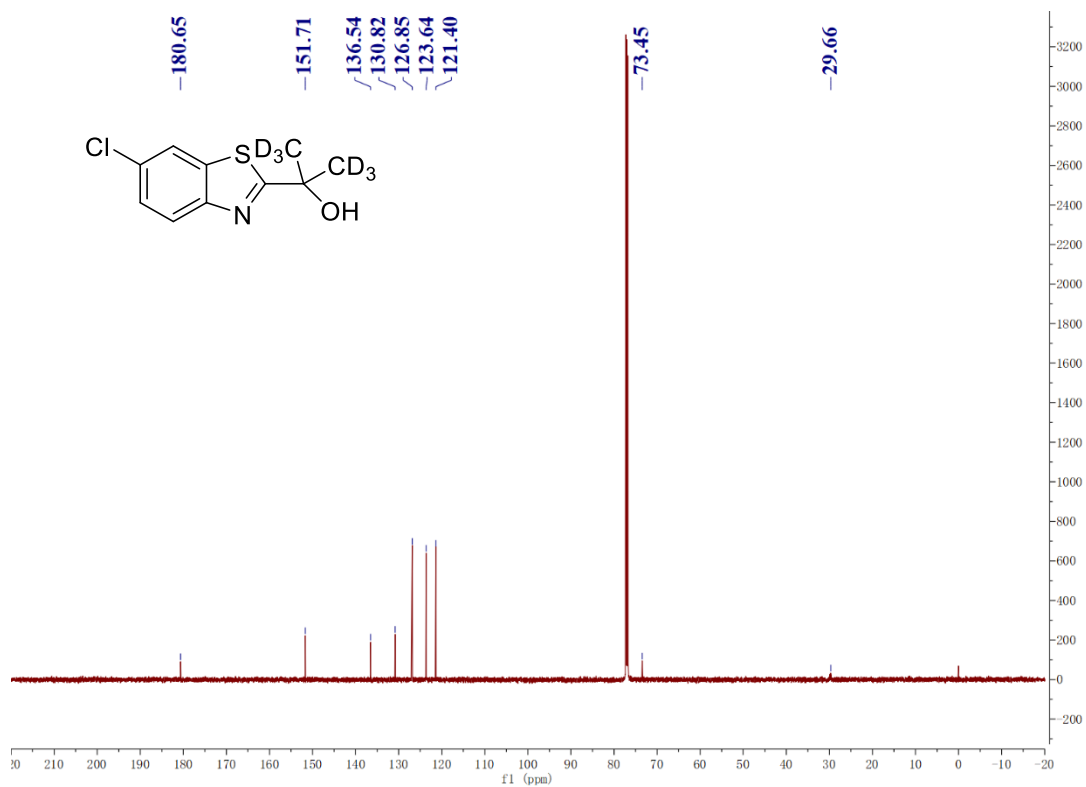

## 7. HRMS spectra

+MS, 0.4min #23

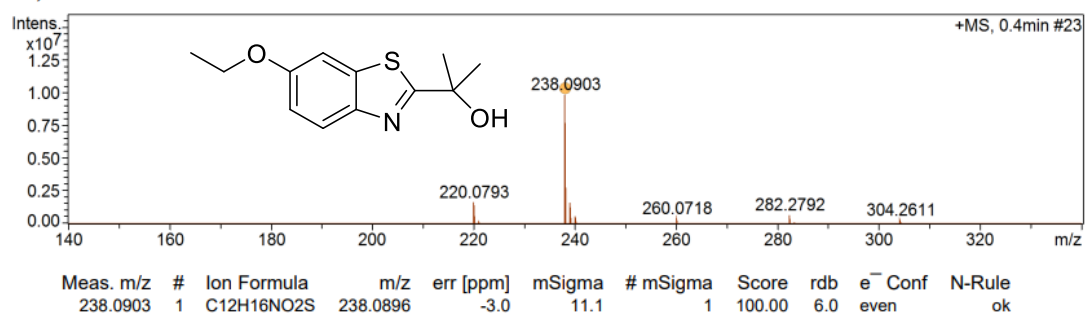

### HRMS spectra of 3d

+MS, 0.3min #19

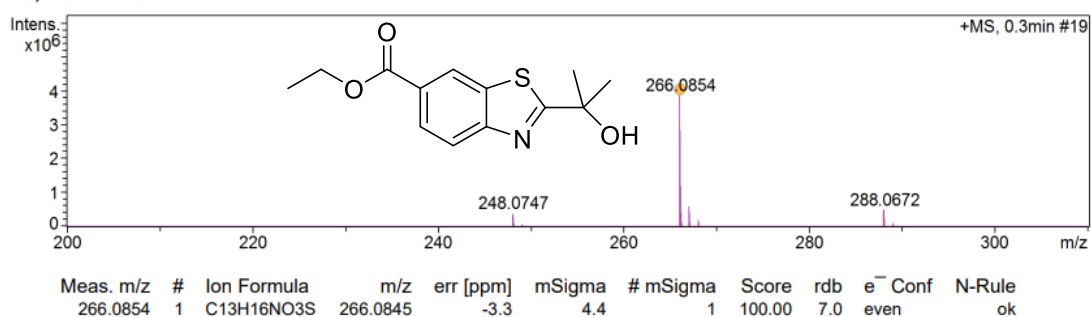

### HRMS spectra of 3h

+MS, 0.3min #20

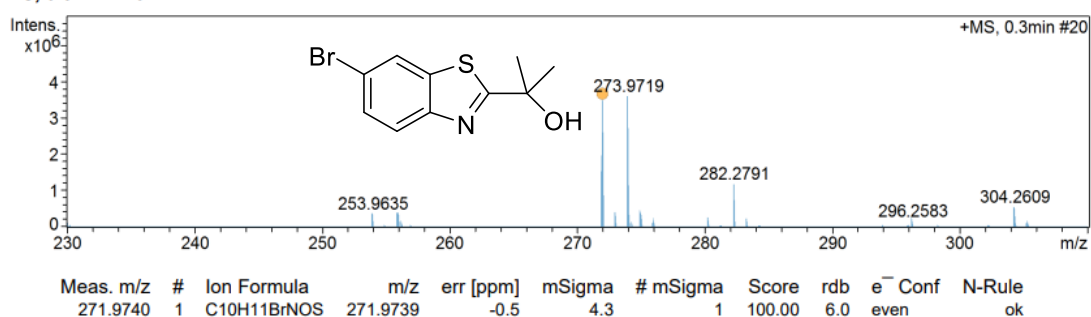

### HRMS spectra of 3j

**+MS, 0.4min #21**

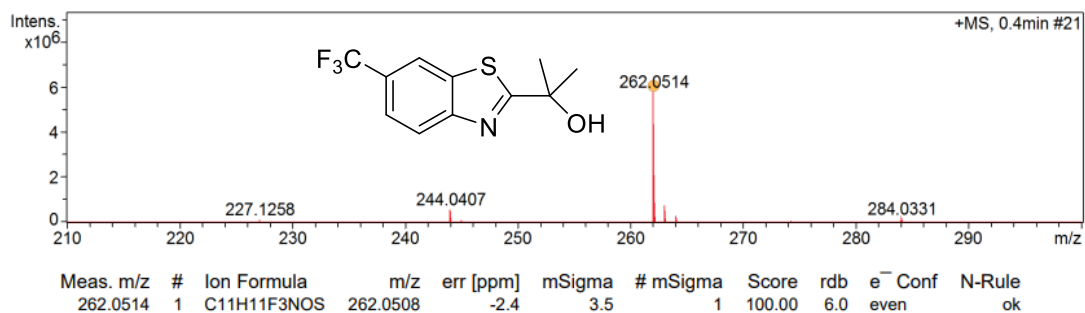

**HRMS spectra of 3k**

**+MS, 0.4min #21**

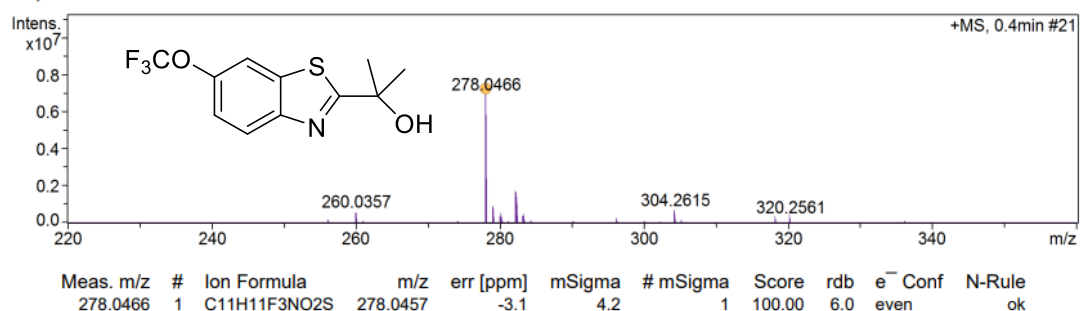

**HRMS spectra of 3i**

**+MS, 0.4min #21**

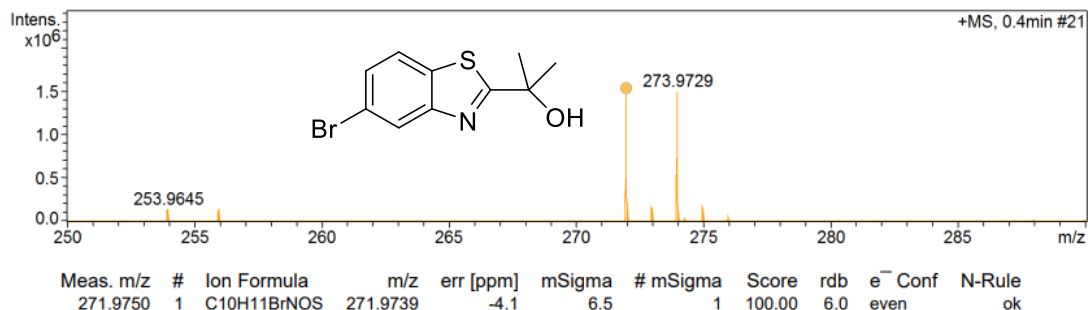

**HRMS spectra of 3n**

**+MS, 0.4min #22**

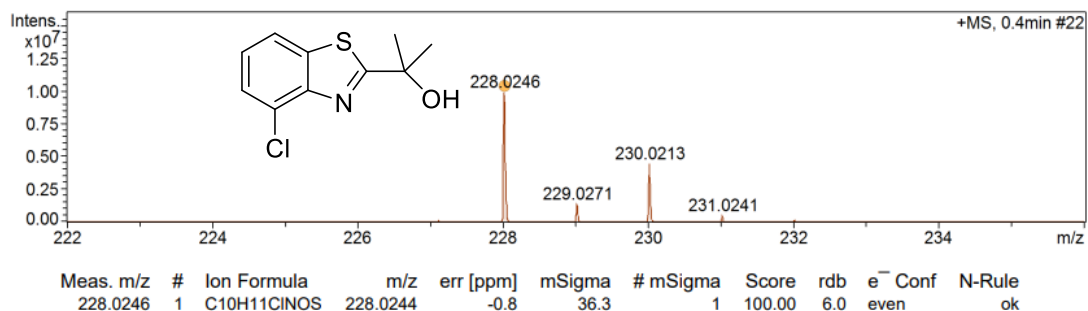

**HRMS spectra of 3o**

**+MS, 0.7min #40**

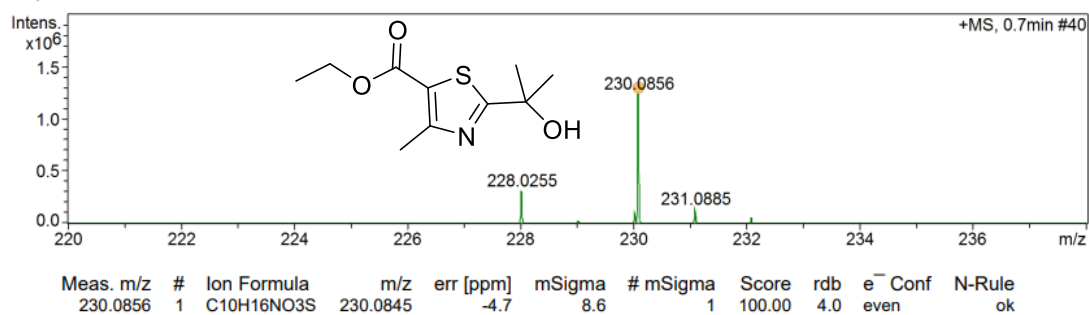

**HRMS spectra of 3r**

**+MS, 0.4min #21**

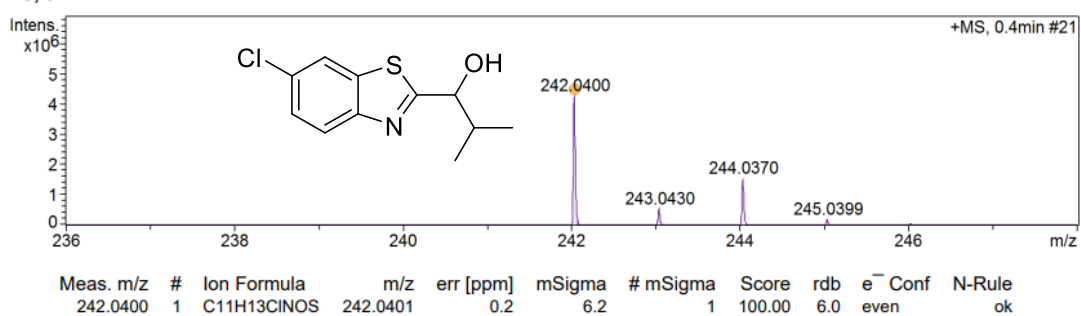

**HRMS spectra of 4d**

**+MS, 0.2min #13**

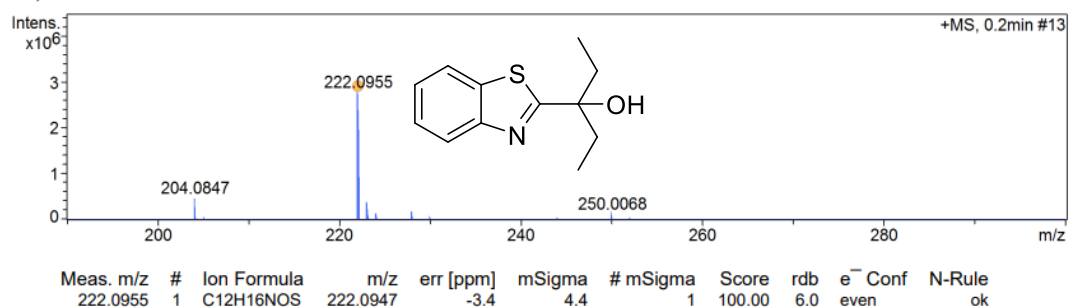

**HRMS spectra of 4f**

**+MS, 0.4min #21**

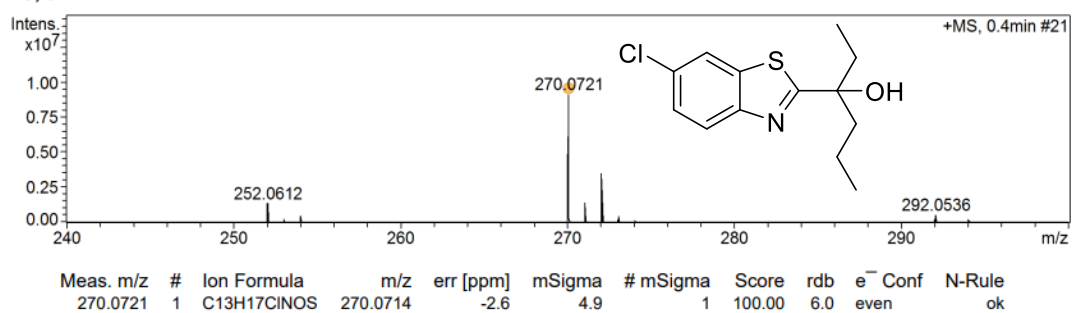

**HRMS spectra of 4g**

**+MS, 0.3min #20**

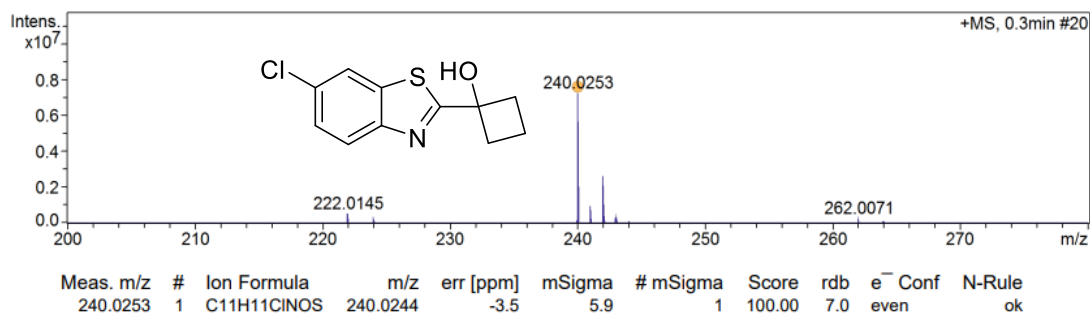

**HRMS spectra of 4h**

**+MS, 0.3min #19**

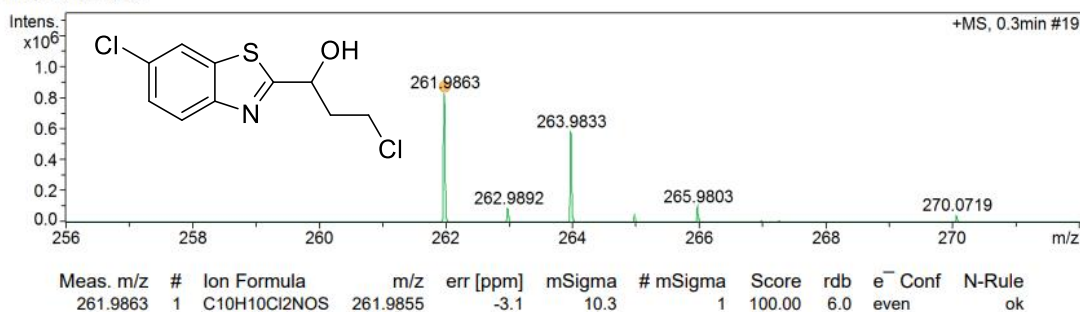

**HRMS spectra of 4l**

**+MS, 0.4min #26**

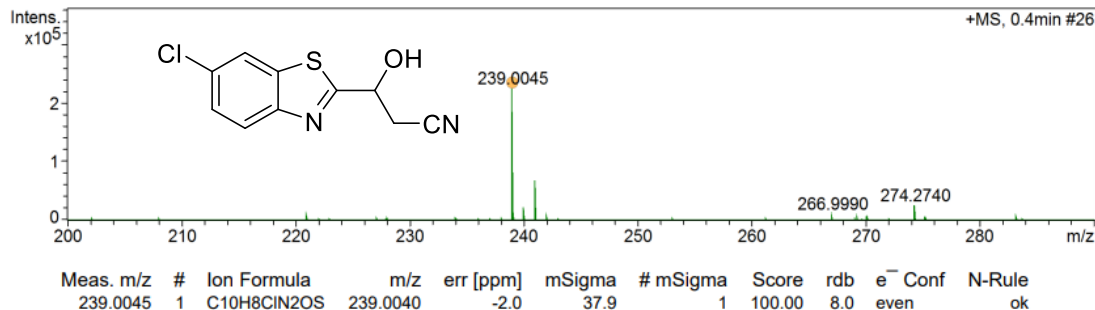

**HRMS spectra of 4m**

**+MS, 0.2min #13**

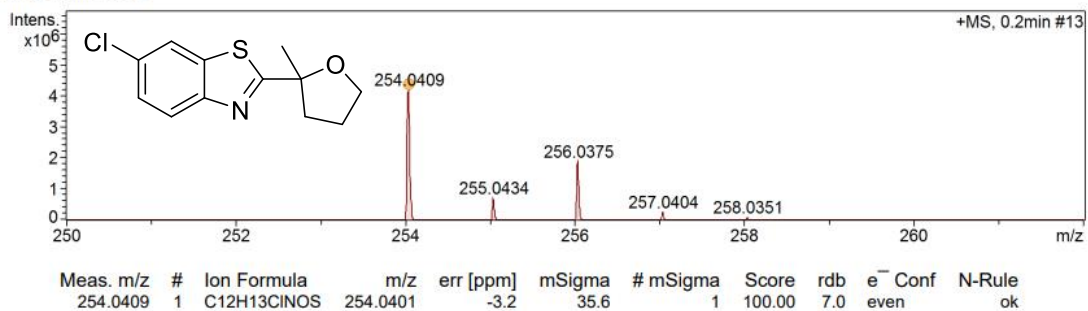

**HRMS spectra of 6b**

**+MS, 0.4min #23**

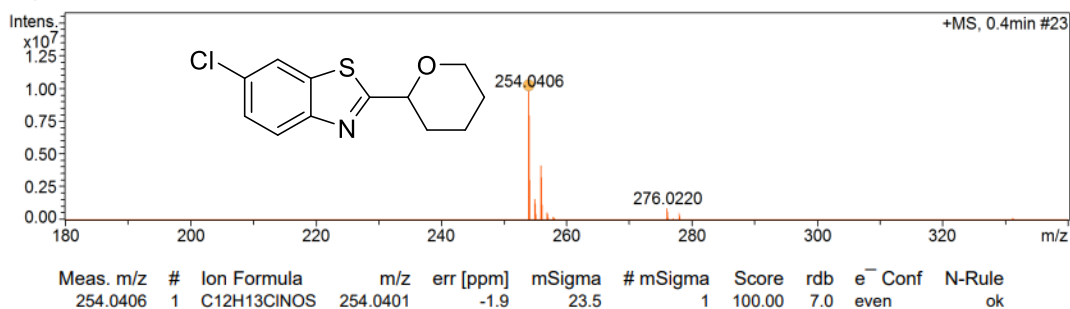

**HRMS spectra of 6c**

**+MS, 0.3min #19**

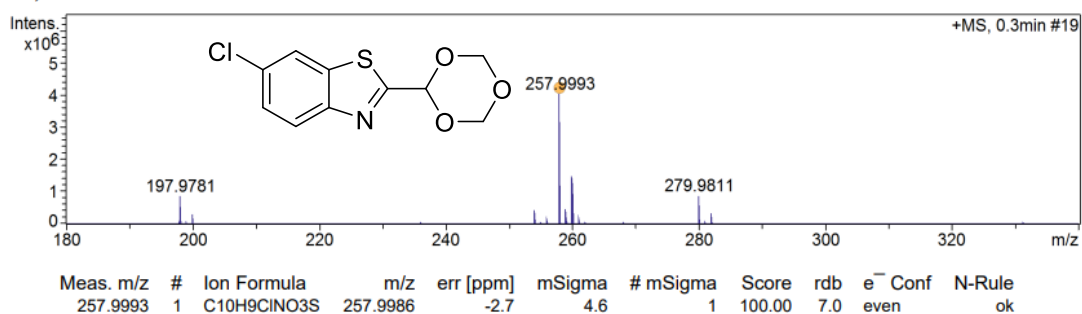

**HRMS spectra of 6f**

**+MS, 0.4min #21**

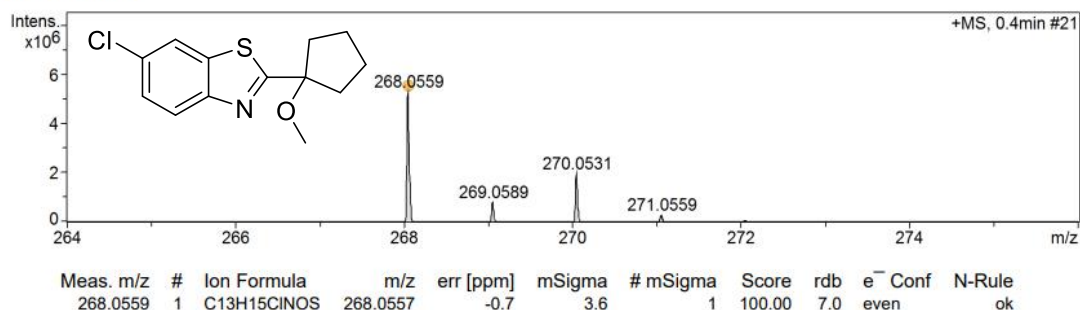

**HRMS spectra of 6g**

**+MS, 0.4min #22**

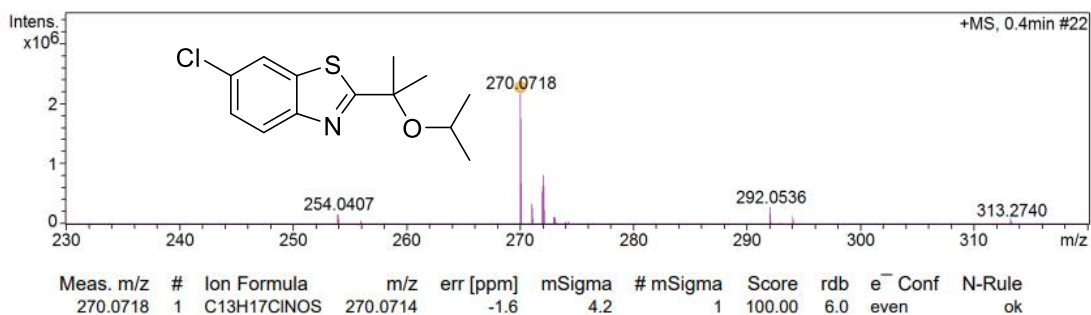

**HRMS spectra of 6h**

**+MS, 0.4min #22**

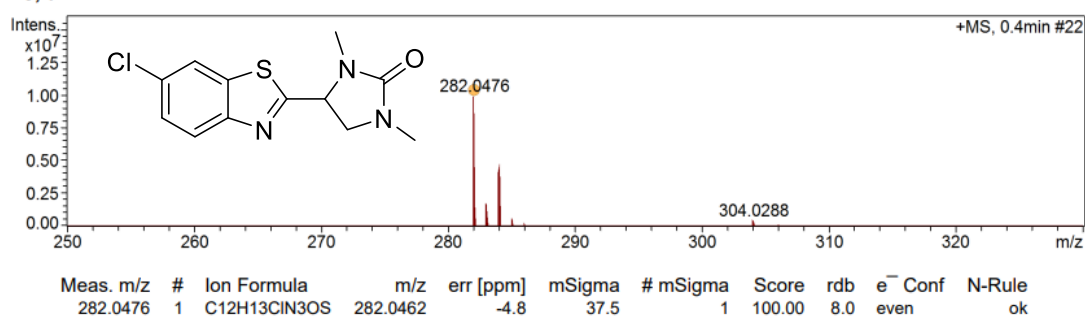

**HRMS spectra of 8a**

**+MS, 0.3min #20**

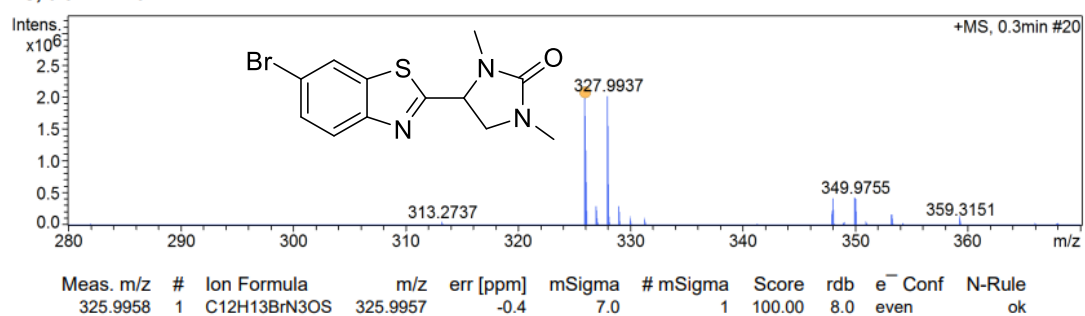

**HRMS spectra of 8b**

**+MS, 0.3min #20**

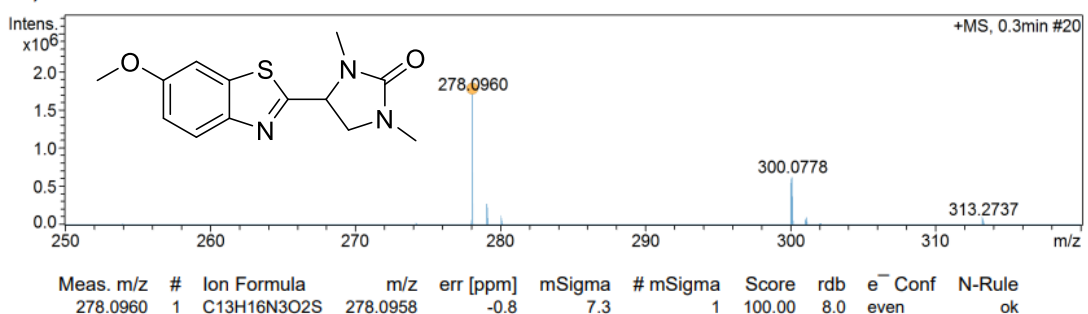

**HRMS spectra of 8c**

**+MS, 0.3min #20**

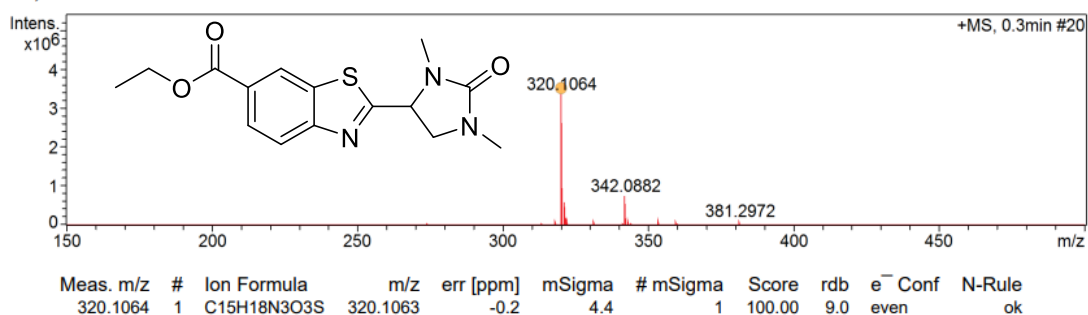

**HRMS spectra of 8d**



**+MS, 0.3min #18**

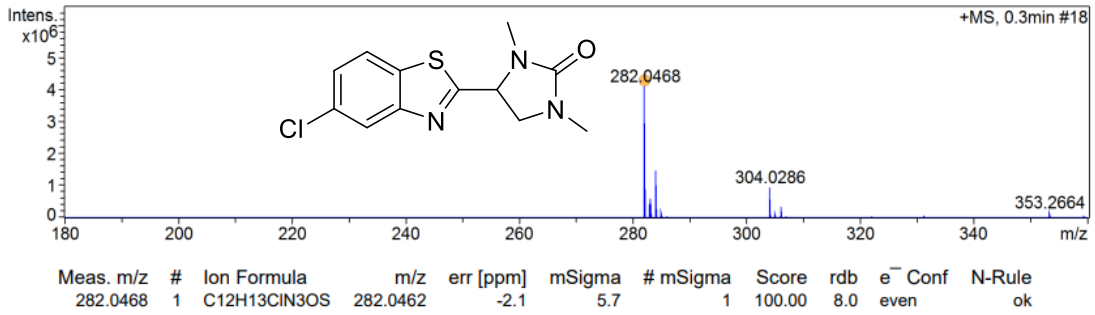

**HRMS spectra of 8e**

**+MS, 0.4min #21**

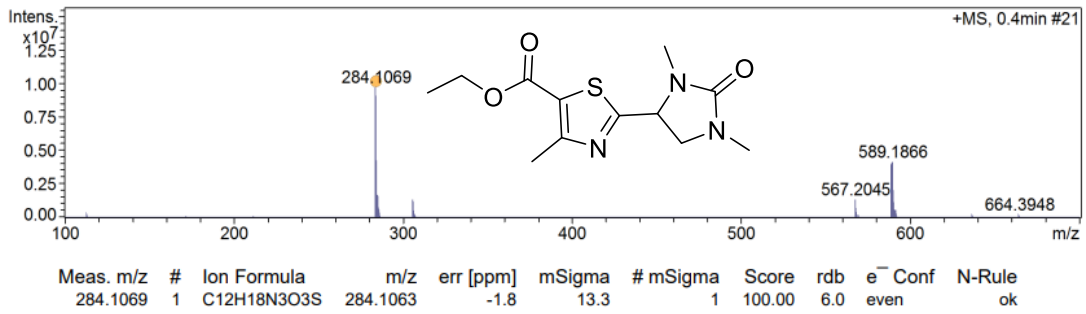

**HRMS spectra of 8f**

**+MS, 0.3min #19**

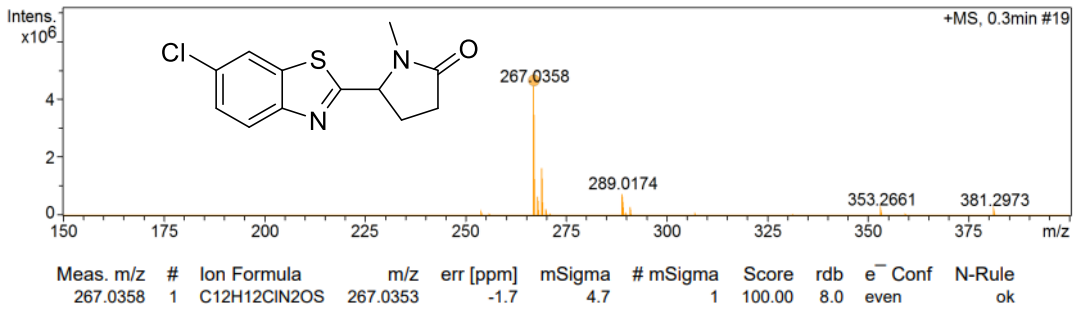

**HRMS spectra of 8g**

**+MS, 0.4min #21**

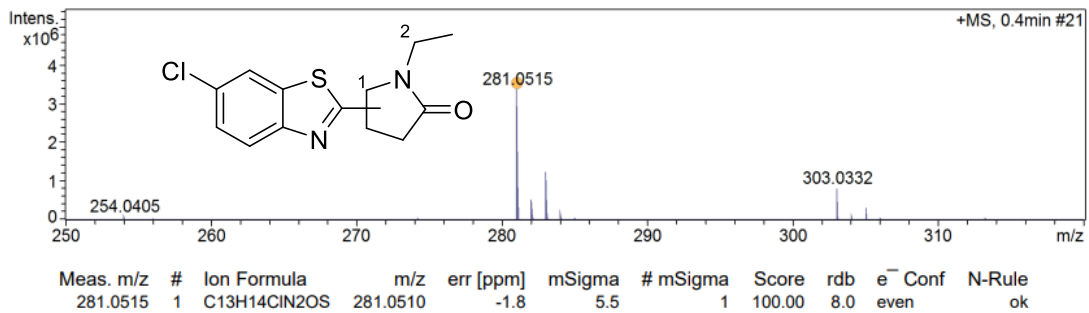

**HRMS spectra of 8h**

**+MS, 0.4min #23**

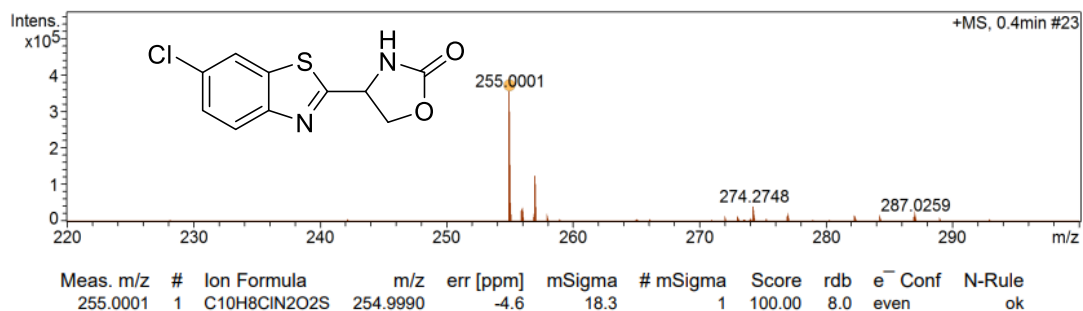

**HRMS spectra of 8i**

**+MS, 0.3min #20**

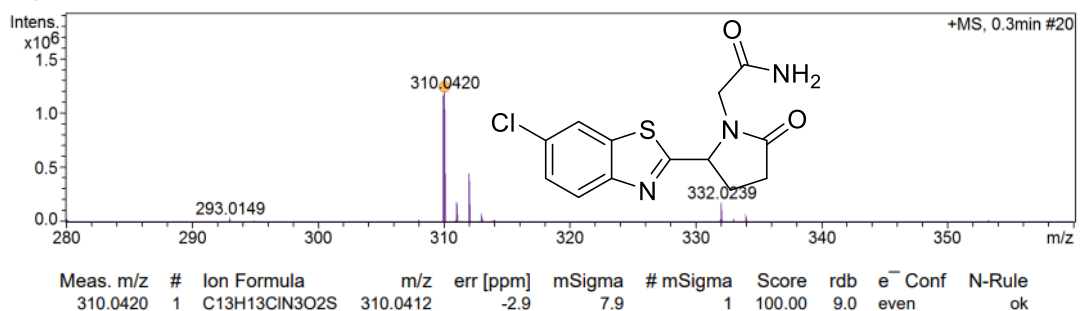

**HRMS spectra of 8j**

**+MS, 0.4min #21**

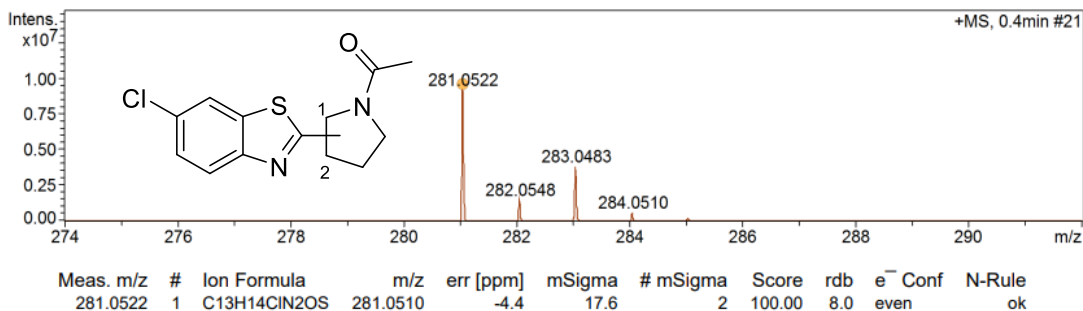

**HRMS spectra of 8k**

**+MS, 0.2min #12**

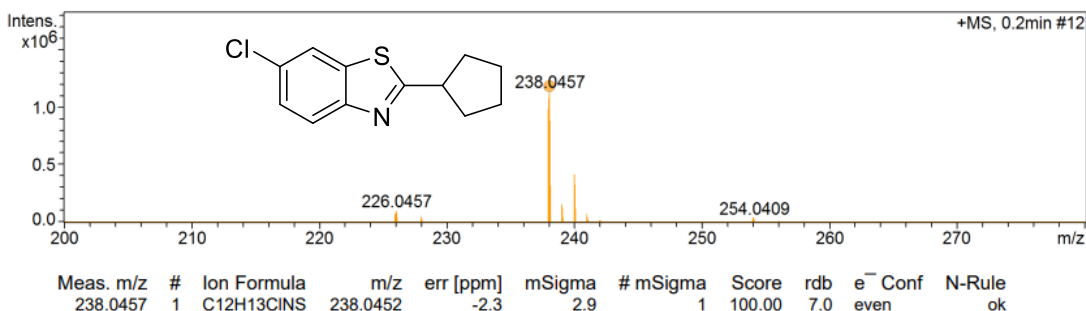

**HRMS spectra of 10a**

**+MS, 0.3min #18**

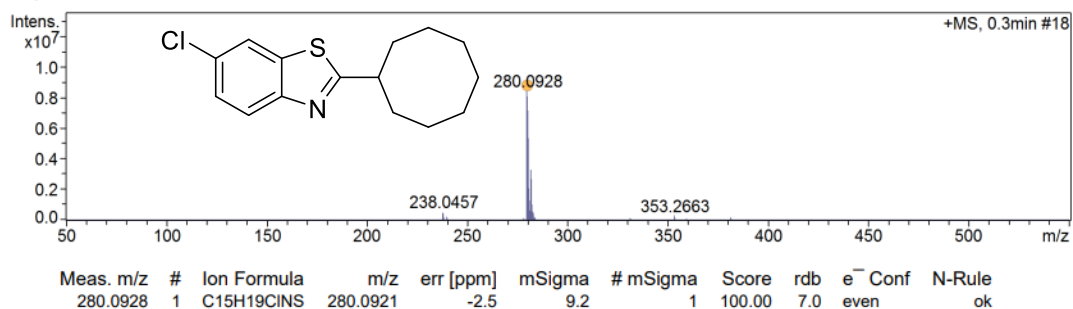

**HRMS spectra of 10c**

**+MS, 0.3min #20**

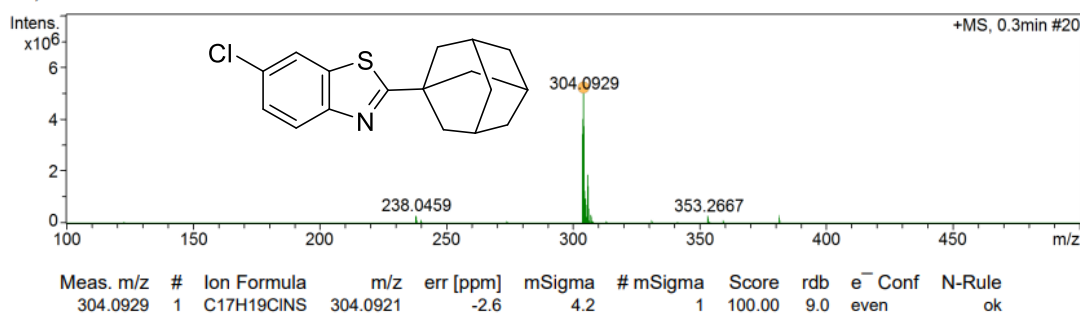

**HRMS spectra of 10d**

**+MS, 0.4min #22**

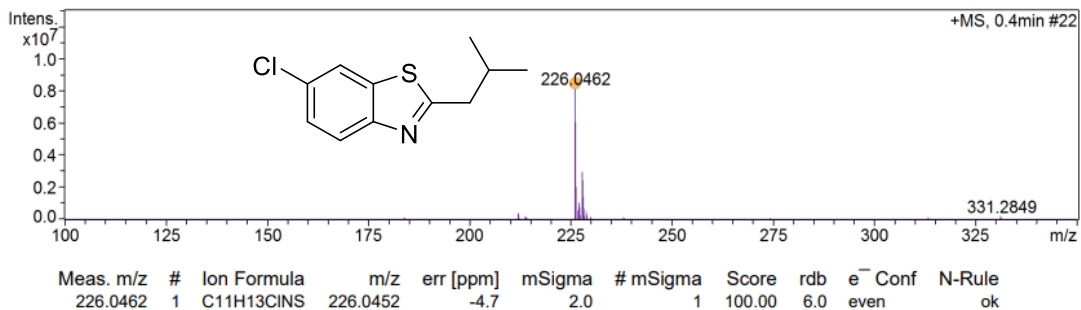

**HRMS spectra of 11e**

**+MS, 0.3min #20**

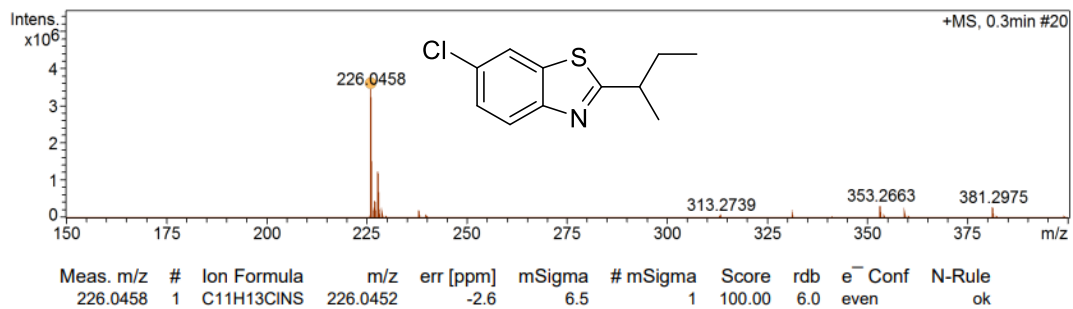

**HRMS spectra of 11g**

**+MS, 0.2min #13**

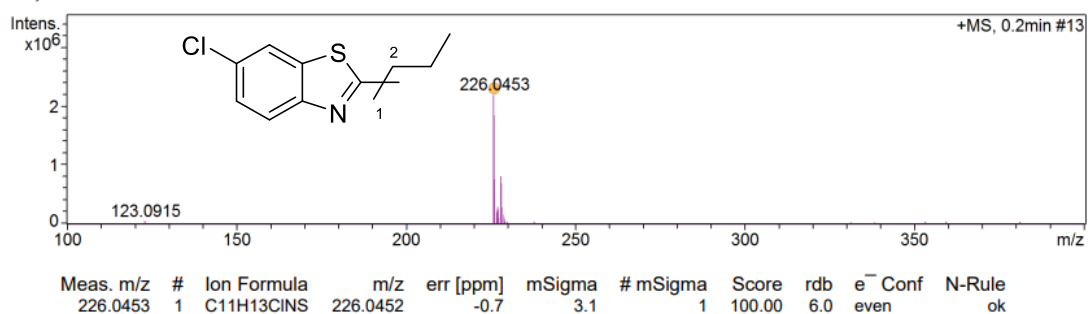

**HRMS spectra of 11i and 11i'**

**+MS, 0.8min #46**

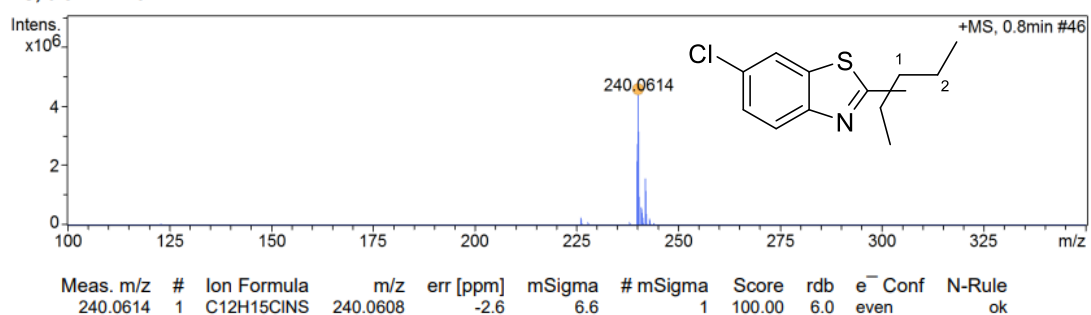

**HRMS spectra of 11j and 11j'**

**+MS, 0.2min #13**

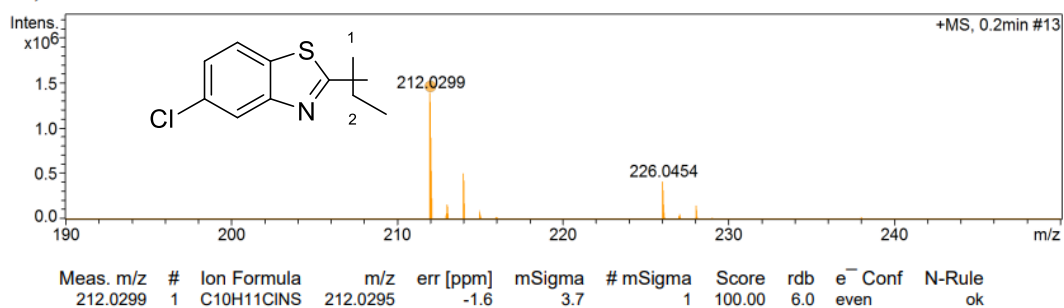

**HRMS spectra of 11k and 11k'**

**+MS, 0.4min #21**

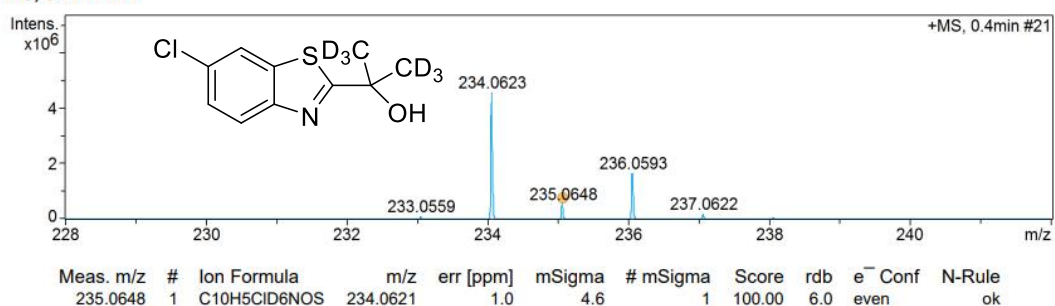

**HRMS spectra of 3a-d<sub>6</sub>**

+MS, 0.6min #38

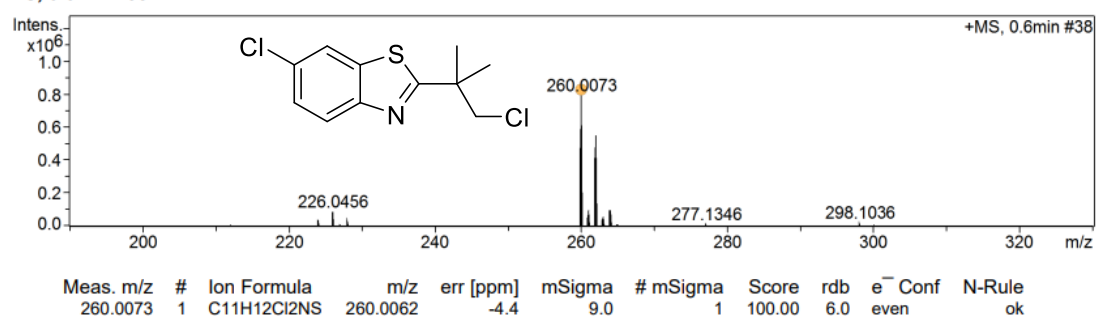

HRMS spectra of 16
